# Supplementary material for: The Role of Insulin-like Peptide in Maintaining Hemolymph Glucose Homeostasis in the Pacific White Shrimp Litopenaeus vannamei
Source: MDPI journal article supplement (doi:10.3390/ijms23063268), 2022-03-17
Supplement: s1 [file s1]

## LCQ-ADVANTAGE Instrument Method

Creator: Administrator

Last modified: 10/5/2015 by Administrator

MS Run Time (min): 100.00

Sequence override of method parameters not enabled.

Divert Valve: not used during run

Contact Closure: not used during run

MS Detector Settings:

Segment 1 Information

Duration (min): 5.00

Number of Scan Events: 1

Tune Method: msms\_sera\_settings\_

Scan Event Details:

1: + c o(150.0-2000.0)

Segment 2 Information

Duration (min): 5.00

Number of Scan Events: 1

Tune Method: Sera\_MSMS

Scan Event Details:

1: + c (506.0)->o(135.0-2000.0)  
MS/MS: CE 35.0% IsoW 1.5

Segment 3 Information

Duration (min): 5.00

Number of Scan Events: 1

Tune Method: Sera\_MSMS

Scan Event Details:

1: + c (521.0)->o(140.0-2000.0)  
MS/MS: CE 35.0% IsoW 1.5

Segment 4 Information

Duration (min): 5.00

Number of Scan Events: 1

Tune Method: Sera\_MSMS

Scan Event Details:

1: + c (525.0)->o(140.0-2000.0)  
MS/MS: CE 35.0% IsoW 1.5

Segment 5 Information

Duration (min): 5.00

Number of Scan Events: 1

Tune Method: Sera\_MSMS

Scan Event Details:

1: + c (528.0)->o(145.0-2000.0)  
MS/MS: CE 35.0% IsoW 1.5

Segment 6 Information

Duration (min): 5.00

Number of Scan Events: 1

Tune Method: Sera\_MSMS

Scan Event Details:

1: + c (541.0)->o(145.0-2000.0)  
MS/MS: CE 35.0% IsoW 1.5

Segment 7 Information

Duration (min): 5.00

Number of Scan Events: 1

Tune Method: Sera\_MSMS

Scan Event Details:

1: + c (549.0)->o(150.0-2000.0)  
MS/MS: CE 35.0% IsoW 1.5

Segment 8 Information

Duration (min): 5.00

Number of Scan Events: 1

Tune Method: Sera\_MSMS

Scan Event Details:

1: + c (558.0)->o(150.0-2000.0)  
MS/MS: CE 35.0% IsoW 1.5

Segment 9 Information

Duration (min): 5.00

Number of Scan Events: 1

Tune Method: Sera\_MSMS

Scan Event Details:

1: + c (559.0)->o(150.0-2000.0)  
MS/MS: CE 35.0% IsoW 1.5

Segment 10 Information

Duration (min): 5.00

Number of Scan Events: 1

Tune Method: Sera\_MSMS

Scan Event Details:

1: + c (584.0)->o(160.0-2000.0)  
MS/MS: CE 35.0% IsoW 1.5

Segment 11 Information

Duration (min): 5.00

Number of Scan Events: 1

Tune Method: Sera\_MSMS

Scan Event Details:

1: + c (603.0)->o(165.0-2000.0)  
MS/MS: CE 35.0% IsoW 1.5

Segment 12 Information

Duration (min): 5.00

Number of Scan Events: 1

Tune Method: Sera\_MSMS

Scan Event Details:

1: + c (618.0)->o(170.0-2000.0)  
MS/MS: CE 35.0% IsoW 1.5

Segment 13 Information

Duration (min): 5.00

Number of Scan Events: 1

Tune Method: Sera\_MSMS  
Scan Event Details:  
1: + c ·(638.0)->o(175.0-2000.0)  
MS/MS: CE 35.0% IsoW 1.5

Segment 14 Information  
Duration (min): 5.00  
Number of Scan Events: 1  
Tune Method: Sera\_MSMS  
Scan Event Details:  
1: + c ·(649.0)->o(175.0-2000.0)  
MS/MS: CE 35.0% IsoW 1.5

Segment 15 Information  
Duration (min): 5.00  
Number of Scan Events: 1  
Tune Method: Sera\_MSMS  
Scan Event Details:  
1: + c ·(665.0)->o(180.0-2000.0)  
MS/MS: CE 35.0% IsoW 1.5

Segment 16 Information  
Duration (min): 5.00  
Number of Scan Events: 1  
Tune Method: Sera\_MSMS  
Scan Event Details:  
1: + c ·(683.0)->o(185.0-2000.0)  
MS/MS: CE 35.0% IsoW 1.5

Segment 17 Information  
Duration (min): 5.00  
Number of Scan Events: 1  
Tune Method: Sera\_MSMS  
Scan Event Details:  
1: + c ·(733.0)->o(200.0-2000.0)  
MS/MS: CE 35.0% IsoW 1.5

Segment 18 Information  
Duration (min): 5.00  
Number of Scan Events: 1  
Tune Method: Sera\_MSMS  
Scan Event Details:  
1: + c ·(761.0)->o(205.0-2000.0)  
MS/MS: CE 35.0% IsoW 1.5

Segment 19 Information  
Duration (min): 5.00  
Number of Scan Events: 1  
Tune Method: Sera\_MSMS  
Scan Event Details:  
1: + c ·(763.0)->o(210.0-2000.0)  
MS/MS: CE 35.0% IsoW 1.5

Segment 20 Information  
Duration (min): 5.00

Number of Scan Events: 1  
Tune Method: Sera\_MSMS  
Scan Event Details:  
1: + c o(150.0-2000.0)
