# Supplementary material for: The Role of Insulin-like Peptide in Maintaining Hemolymph Glucose Homeostasis in the Pacific White Shrimp Litopenaeus vannamei
Source: MDPI journal article supplement (doi:10.3390/ijms23063268), 2022-03-17
Supplement: s1 [file s1]

| LCQ-ADVANTAGE Machine Status Log          |         |
|-------------------------------------------|---------|
| API SOURCE                                |         |
| Source Voltage (kV):                      | 1.71    |
| Source Current (uA):                      | 0.19    |
| Source Thermocouple OK:                   | No      |
| Source Temp (C):                          | 0       |
| Sheath Gas Flow Rate (l):                 | -0.15   |
| Aux/Sweep Gas Flow Rate(l):               | -0.16   |
| Capillary RTD OK:                         | Yes     |
| Capillary Voltage (V):                    | -10.4   |
| Capillary Temp (C):                       | 195.2   |
| Tube Lens Voltage (V, set point):         | -105    |
|                                           |         |
| VACUUM                                    |         |
| Vacuum OK:                                | Yes     |
| Ion Gauge Pressure OK:                    | Yes     |
| Ion Gauge Status:                         | On      |
| Ion Gauge (x10e-5 Torr):                  | 1.15    |
| Convectron Pressure OK:                   | Yes     |
| Convectron Gauge (Torr):                  | 0.86    |
|                                           |         |
| TURBO PUMP                                |         |
| Status:                                   | Running |
| Life (hours):                             | 86746   |
| Speed (rpm):                              | 60000   |
| Power (Watts):                            | 37      |
|                                           |         |
| ION OPTICS                                |         |
| Multipole 1 Offset (V):                   | -3.95   |
| Lens Voltage (V):                         | -19.62  |
| Multipole 2 Offset (V):                   | -5.27   |
| Multipole RF Amplitude (Vp-p, set point): | 460     |
| Coarse Trap DC Offset (V):                | -9.52   |
| Fine Trap DC Offset (V):                  | -9.63   |
|                                           |         |
| MAIN RF                                   |         |
| Reference Sine Wave OK:                   | Yes     |
| Standing Wave Ratio OK:                   | Yes     |
| Main RF DAC (steps):                      | 63      |
| Main RF Detected (V):                     | -0.08   |
| RF Detector Temp (C):                     | 32.91   |
| Main RF Modulation (V):                   | 0       |
| Main RF Amplifier (Vp-p):                 | 8.74    |
| RF Generator Temp (C):                    | 35.69   |

| LCQ-ADVANTAGE Machine Status Log |           |
|----------------------------------|-----------|
|                                  |           |
| ION DETECTION SYSTEM             |           |
| Dynode Voltage (kV):             | -14.85    |
| Multiplier Actual (V):           | -1217.25  |
|                                  |           |
| POWER SUPPLIES                   |           |
| +5V Supply Voltage (V):          | 5.05      |
| -15V Supply Voltage (V):         | -14.99    |
| +15V Supply Voltage (V):         | 14.74     |
| +24V Supply Voltage (V):         | 23.63     |
| -28V Supply Voltage (V):         | -27.95    |
| +28V Supply Voltage (V):         | 28.45     |
| +28V Supply Current (Amps):      | 1.14      |
| +35V Supply Voltage (V):         | 36.04     |
| +36V Supply Voltage (V):         | 35.97     |
| -150V Supply Voltage (V):        | -157.11   |
| +150V Supply Voltage (V):        | 156.23    |
| -205V Supply Voltage (V):        | -212.49   |
| +205V Supply Voltage (V):        | 210.51    |
| Ambient Temp (C):                | 22.17     |
|                                  |           |
| INSTRUMENT STATUS                |           |
| Instrument:                      | On        |
| Analysis:                        | Acquiring |
|                                  |           |
| SYRINGE PUMP                     |           |
| Status:                          | Ready     |
|                                  |           |
| DIGITAL INPUTS                   |           |
| READY IN is active:              | No        |
| START IN is active:              | No        |
| Divert/Inject valve:             | Inject    |
