# Supplementary material for: The Role of Insulin-like Peptide in Maintaining Hemolymph Glucose Homeostasis in the Pacific White Shrimp Litopenaeus vannamei
Source: MDPI journal article supplement (doi:10.3390/ijms23063268), 2022-03-17
Supplement: s1 [file s1]

**Supplementary SA: Supplementary Information Word Files.** **File SA1:** Author comments concerning the Ovarian data previously published; **File SA2:** Patient samples utilized for MSMS; **File SA3:** Binary LOOCV test metrics; **File SA4:** Concerning Files uploaded to JPost repository; **File SA5:** LCQ-ADVANTAGE Instrument Method for MSMS example; **File SA6:** LCQ-ADVANTAGE Machine Status Log MSMS example).

**Supplementary SB: Supplementary Information Excel Files.** **File SB1:** Sera as used in LOOCV Figures; **File SB2:** Master peak areas for each patient De-identified; **File SB3:** LOOCV Significant peaks by test and figure; **File SB4:** LOOCV results of sera MS peaks; **File SB5:** Peak list for MSMS analysis of sera).

Figure S1. LOOCV Analysis of Randomized Groups.

Figure S2. LOOCV Analysis of Stages I or III Ovarian and Endometrial Cancers.

Table S1. Gene IDs and Names of proteins.

Supplementary SA: Supplementary Information Word Files. **File SA1:** Author comments concerning the Ovarian data previously published; **File SA2:** Patient samples utilized for MSMS; **File SA3:** Binary LOOCV test metrics; **File SA4:** Concerning Files uploaded to JPost repository; **File SA5:** LCQ-ADVANTAGE Instrument Method for MSMS example; **File SA6:** LCQ-ADVANTAGE Machine Status Log MSMS example).

Supplementary SB: Supplementary Information Excel Files. **File SB1:** Sera as used in LOOCV Figures; **File SB2:** Master peak areas for each patient De-identified; **File SB3:** LOOCV Significant peaks by test and figure; **File SB4:** LOOCV results of sera MS peaks; **File SB5:** Peak list for MSMS analysis of sera).
