# Supplementary material for: The Role of Insulin-like Peptide in Maintaining Hemolymph Glucose Homeostasis in the Pacific White Shrimp Litopenaeus vannamei
Source: MDPI journal article supplement (doi:10.3390/ijms23063268), 2022-03-17
Supplement: s1 [file s1]

| Patient samples utilized for MS/MS |                             |                            |
|------------------------------------|-----------------------------|----------------------------|
| test                               | pathology                   | deidentified<br>PATIENT ID |
| 12V34                              | Endometrial Cancer I & II   | 37                         |
| 12V34                              | Endometrial Cancer I & II   | 42                         |
| 12V34                              | Endometrial Cancer I & II   | 46                         |
| 12V34                              | Endometrial Cancer I & II   | 48                         |
| 12V34                              | Endometrial Cancer I & II   | 51                         |
| 12V34                              | Endometrial Cancer III & IV | 60                         |
| 12V34                              | Endometrial Cancer III & IV | 63                         |
| 12V34                              | Endometrial Cancer III & IV | 67                         |
| 12V34                              | Endometrial Cancer III & IV | 68                         |
| 12V34                              | Endometrial Cancer III & IV | 70                         |
| 12VBN                              | Endometrial Cancer I & II   | 36                         |
| 12VBN                              | Endometrial Cancer I & II   | 39                         |
| 12VBN                              | Endometrial Cancer I & II   | 40                         |
| 12VBN                              | Endometrial Cancer I & II   | 44                         |
| 12VBN                              | Endometrial Cancer I & II   | 45                         |
| 12VBN                              | Benign gynecology           | 81                         |
| 12VBN                              | Benign gynecology           | 84                         |
| 12VBN                              | Benign gynecology           | 88                         |
| 12VBN                              | Benign gynecology           | 90                         |
| 12VBN                              | Benign gynecology           | 93                         |
| 34VBN                              | Endometrial Cancer III & IV | 60                         |
| 34VBN                              | Endometrial Cancer III & IV | 66                         |
| 34VBN                              | Endometrial Cancer III & IV | 67                         |
| 34VBN                              | Endometrial Cancer III & IV | 68                         |
| 34VBN                              | Endometrial Cancer III & IV | 72                         |
| 34VBN                              | Benign gynecology           | 75                         |
| 34VBN                              | Benign gynecology           | 77                         |
| 34VBN                              | Benign gynecology           | 80                         |
| 34VBN                              | Benign gynecology           | 84                         |
| 34VBN                              | Benign gynecology           | 87                         |
