# Supplementary material for: The Role of Insulin-like Peptide in Maintaining Hemolymph Glucose Homeostasis in the Pacific White Shrimp Litopenaeus vannamei
Source: MDPI journal article supplement (doi:10.3390/ijms23063268), 2022-03-17
Supplement: s1 [file s1]

Table : Patient Characteristics by Group Analyzed

| Figure | Test Metrics<br>(group 1 vs. group 2)                                                                 | % LOOCV<br>Mean<br>(SD)<br>group 1 | % LOOCV<br>Mean<br>(SD)<br>group 2 | True<br>Positive<br>group 1 | False<br>Positive<br>group 2 | True<br>Negative<br>group 2 | False<br>Negative<br>group 1 | N                                                                                                                           |
|--------|-------------------------------------------------------------------------------------------------------|------------------------------------|------------------------------------|-----------------------------|------------------------------|-----------------------------|------------------------------|-----------------------------------------------------------------------------------------------------------------------------|
| 2      | Endometrial Cancer Stages I, II, III & IV vs.<br>Abnormal Endometrium Non-Cancer; ROC(area=0.95)      | 50.0<br>(6.0)                      | 28.0<br>(4.8)                      | 39/40<br>(98%)              | 0/20<br>(0%)                 | 20/20<br>(100%)             | 1/40<br>(2%)                 | Endometrial Cancer Stages I, II, III & IV, N=40<br>Abnormal Endometrium Non-Cancer, N=20                                    |
| 3      | Endometrial Cancer Stages I & II vs.<br>Abnormal Endometrium Non-Cancer; ROC(area=1.0)                | 58.5<br>(5.3)                      | 34.3<br>(4.9)                      | 20/20<br>(100%)             | 0/20<br>(0%)                 | 20/20<br>(100%)             | 0/20<br>(0%)                 | Endometrial Cancer Stages I & II, N=20<br>Abnormal Endometrium Non-Cancer, N=20                                             |
| 4      | Endometrial Cancer Stages III & IV vs.<br>Abnormal Endometrial Not-Cancer; ROC(area=1.0)              | 59.9<br>(4.5)                      | 41.0<br>(4.2)                      | 20/20<br>(100%)             | 0/20<br>(0%)                 | 20/20<br>(100%)             | 0/20<br>(0%)                 | Endometrial Cancer Stages III & IV, N=20<br>Abnormal Endometrial Not-Cancer, N=20                                           |
| 5      | Endometrial Cancer Stages I & II vs.<br>Endometrial Cancer Stages III & IV; ROC(area=1.0)             | 60.1<br>(5.9)                      | 36.7<br>(5.6)                      | 20/20<br>(100%)             | 0/20<br>(0%)                 | 20/20<br>(100%)             | 0/20<br>(0%)                 | Endometrial Cancer Stages I & II, N=20<br>Endometrial Cancer Stages III & IV, N=20                                          |
| 6      | Ovarian Cancer Stages I, II, III & IV vs.<br>Endometrial Cancer Stages I, II, III & IV; ROC(area=1.0) | 69.9<br>(6.5)                      | 42.0<br>(4.3)                      | 0/35<br>(100%)              | 0/20<br>(0%)                 | 35/35<br>(100\$)            | 0/20<br>(0%)                 | Ovarian Cancer Stages: I, N=16; II, N=4; III,N=12; IV,N=2<br>Endometrial Cancer Stages I, N=19; II, N=1; III, N=19; IV, N=1 |

Table : Significance Between Tested Groups

| Cohen's<br><i>d</i> | Figure | Test Metrics                                                                           | Sensitivity | Efficiency/<br>{accuracy} | True<br>Positive<br>Rate | False<br>Positive<br>Rate | Specificity | <i>P</i> -value | Random<br>database<br><i>P</i> -value | ROC<br>(Area) | Selection<br>Frequency<br>Minimum | # peaks  | m/Z range |
|---------------------|--------|----------------------------------------------------------------------------------------|-------------|---------------------------|--------------------------|---------------------------|-------------|-----------------|---------------------------------------|---------------|-----------------------------------|----------|-----------|
| 4.0                 | 2      | Endometrial Cancer Stages I, II, III & IV vs.<br>Abnormal Endometrium Non-Cancer       | 0.98        | 0.98                      | 0.98                     | 0                         | 1.0         | 6.6 x 10 -20    | 0.014                                 | 0.95          | 0.50                              | 96-104   | 400-1800  |
| 4.7                 | 3      | Endometrial Cancer Stages I, II, III & IV vs.<br>Abnormal Endometrium Non-Cancer       | 1.0         | 1.0                       | 1.0                      | 0.0                       | 1.0         | 8.8 x 10 -18    | 0.03                                  | 1.0           | 0.75                              | 111-1119 | 400-2000  |
| 3.9                 | 4      | Endometrial Cancer Stages III & IV vs.<br>Abnormal Endometrial Not-Cancer              | 1.0         | 1.0                       | 1.0                      | 0.0                       | 1.0         | 1.6 x 10 -16    | 0.05                                  | 1.0           | 0.40                              | 113-124  | 500-2000  |
| 4.0                 | 5      | Endometrial Cancer Stages I & II vs.<br>Endometrial Cancer Stages III & IV             | 1.0         | 1.0                       | 1.0                      | 0.0                       | 1.0         | 8.9 x 10 -16    | 0.026                                 | 1.0           | 0.50                              | 93-102   | 450-1800  |
| 5.0                 | 6      | Ovarian Cancer Stages I, II, III & IV vs.<br>Endometrial Cancer Stages I, II, III & IV | 1.0         | 1.0                       | 1.0                      | 0.0                       | 1.0         | 6.8 x 10-29     | 0.21                                  | 1.0           | 0.98                              | 351      | 400-2000  |

Table: Patient Characteristics

| Groups                               | Age (Range) SD      | BMI (Range) SD      | Tobacco<br>History | ETOH<br>History | Diabetes | HTN | CAD | Arthritis | NSAIDs | ASA | Metformin | Insulin |
|--------------------------------------|---------------------|---------------------|--------------------|-----------------|----------|-----|-----|-----------|--------|-----|-----------|---------|
| Abnormal Endometrium (control), N=20 | 57.0 (50 - 64) 5.1  | 35.3 (22 - 54) 8.1  | 4                  | 6               | 1        | 10  | 1   | 1         | 3      | 2   | 0         | 0       |
| Endometrial Cancer, N=40             | 57.9 (31 - 77) 8.4  | 35.2 (21 - 48) 6.7  | 13                 | 6               | 6        | 21  | 1   | 7         | 14     | 4   | 2         | 1       |
| Stage I, N=19                        | 55.8 (51 - 61) 2.6  | 36.6 (24 - 48) 6.0  | 6                  | 3               | 3        | 11  | 1   | 1         | 5      | 4   | 1         | 0       |
| Stage II, N=1                        | 57.0 (57 - 57) na   | 21.0 (21 -20) na    | 1                  | 0               | 0        | 1   | 0   | 1         | 1      | 0   | 0         | 0       |
| Stage III, N=19                      | 61.1 (31 - 77) 10.5 | 34.2 (22 - 45) 6.5  | 6                  | 3               | 3        | 9   | 0   | 4         | 8      | 3   | 1         | 1       |
| Stage IV, N=1                        | 40.0 (40 -40) na    | 42.0 (42 - 42) na   | 0                  | 0               | 0        | 0   | 0   | 1         | 0      | 0   | 0         | 0       |
| Ovarian Cancer, N=34                 | 60.6 (35 - 78) 9.9  | 29.0 (18 - 53) 9.2  | 8                  | 7               | 4        | 16  | 3   | 3         | 8      | 5   | 1         | 0       |
| Stage I, N=16                        | 58.8 (45 - 73) 7.5  | 31.7 (18 - 53) 10.3 | 6                  | 6               | 3        | 8   | 2   | 3         | 6      | 2   | 1         | 0       |
| Stage II, N=4                        | 72.3 (67 - 76) 3.8  | 24.0 (19 - 27) 3.8  | 2                  | 0               | 0        | 2   | 0   | 0         | 0      | 0   | 0         | 0       |
| Stage III, N=12                      | 59.7 (35 - 78) 11.3 | 26.0 (18 - 43) 7.0  | 0                  | 1               | 0        | 4   | 0   | 0         | 2      | 2   | 0         | 0       |
| Stage IV, N=2                        | 57.5 (45 - 70) 17.7 | 35.5 (25 - 46) 14.8 | 0                  | 0               | 1        | 2   | 1   | 0         | 0      | 1   | 0         | 0       |
