# Supplementary material for: The Role of Insulin-like Peptide in Maintaining Hemolymph Glucose Homeostasis in the Pacific White Shrimp Litopenaeus vannamei
Source: Int J Mol Sci. 2022 Mar 17;23(6):3268. doi: 10.3390/ijms23063268 (PMC8948857; doi:10.3390/ijms23063268)
Supplement: Supplementary file 1 [file ijms-23-03268-s001.zip]

Archive with 15 entries (15 files):
- Supplemental Figure S1.tif
- Supplemental Figure S2.tif
- Supplemental Table S1.xls
- Supplementary SA. File SA1. Author comments concerning the Ovarian data previously published.pdf
- Supplementary SA. File SA2. Patient samples utilized for MSMS.pdf
- Supplementary SA. File SA3. Binary LOOCV test metrics.pdf
- Supplementary SA. File SA4. Concerning Files uploaded to JPost repository.pdf
- Supplementary SA. File SA5. LCQ-ADVANTAGE Instrument Method for MSMS example.pdf
- Supplementary SA. File SA6. LCQ-ADVANTAGE Machine Status Log MSMS example.pdf
- Supplementary SB. File SB1. Sera as used in LOOCV Figures.xlsx
- Supplementary SB. File SB2. Master peak areas for each patient De-identified.xlsx
- Supplementary SB. File SB3. LOOCV Significant peaks by test and figure.xlsx
- Supplementary SB. File SB4. LOOCV results of sera MS peaks.xlsx
- Supplementary SB. File SB5. Peak list for MSMS analysis of sera.xlsx
- Supplementary.pdf
