# Supplementary material for: The Role of Insulin-like Peptide in Maintaining Hemolymph Glucose Homeostasis in the Pacific White Shrimp Litopenaeus vannamei
Source: Int J Mol Sci. 2022 Mar 17;23(6):3268. doi: 10.3390/ijms23063268 (PMC8948857; doi:10.3390/ijms23063268)
Supplement: Supplementary file 1 [file ijms-23-03268-s001.zip › Supplemental Table S1.xls]

## Sheet: Sheet0
Abbreviation	Entrez Gene Name	Location	Function
ABCG5	ATP binding cassette subfamily G member 5	Plasma Membrane	transporter
ACLY	ATP citrate lyase	Cytoplasm	enzyme
ADAM33	ADAM metallopeptidase domain 33	Plasma Membrane	peptidase
ADAMTS16	ADAM metallopeptidase with thrombospondin type 1 motif 16	Extracellular Space	other
ADAMTS8	ADAM metallopeptidase with thrombospondin type 1 motif 8	Extracellular Space	peptidase
AEBP1	AE binding protein 1	Nucleus	peptidase
AGL	amylo-alpha-1, 6-glucosidase, 4-alpha-glucanotransferase	Cytoplasm	enzyme
AKAP13	A-kinase anchoring protein 13	Cytoplasm	other
ALAS1	5'-aminolevulinate synthase 1	Cytoplasm	enzyme
ALDH18A1	aldehyde dehydrogenase 18 family member A1	Cytoplasm	kinase
ALOX12	arachidonate 12-lipoxygenase, 12S type	Cytoplasm	enzyme
ALOX12B	arachidonate 12-lipoxygenase, 12R type	Cytoplasm	enzyme
ANKRD11	ankyrin repeat domain 11	Nucleus	other
ANKRD50	ankyrin repeat domain 50	Other	other
ANKS1A	ankyrin repeat and sterile alpha motif domain containing 1A	Cytoplasm	other
ANXA6	annexin A6	Plasma Membrane	ion channel
ARHGAP44	Rho GTPase activating protein 44	Cytoplasm	other
ARHGEF5	Rho guanine nucleotide exchange factor 5	Cytoplasm	other
ASH1L	ASH1 like histone lysine methyltransferase	Nucleus	transcription regulator
BAZ2B	bromodomain adjacent to zinc finger domain 2B	Extracellular Space	other
BDP1	B double prime 1, subunit of RNA polymerase III transcription initiation factor IIIB	Nucleus	transcription regulator
BMS1P19	BMS1 pseudogene 19	Other	other
BRCA1	BRCA1 DNA repair associated	Nucleus	transcription regulator
C1orf56	chromosome 1 open reading frame 56	Other	other
C1R	complement C1r	Extracellular Space	peptidase
CACNA1A	calcium voltage-gated channel subunit alpha1 A	Plasma Membrane	ion channel
CACNA1E	calcium voltage-gated channel subunit alpha1 E	Plasma Membrane	ion channel
CASP8	caspase 8	Nucleus	peptidase
CBL	Cbl proto-oncogene	Nucleus	transcription regulator
CCR6	C-C motif chemokine receptor 6	Plasma Membrane	G-protein coupled receptor
CD7	CD7 molecule	Plasma Membrane	other
CDAN1	codanin 1	Nucleus	other
CDH23	cadherin related 23	Plasma Membrane	transporter
CDK5RAP2	CDK5 regulatory subunit associated protein 2	Cytoplasm	other
CEP164	centrosomal protein 164	Cytoplasm	other
CFAP221	cilia and flagella associated protein 221	Extracellular Space	other
CFAP54	cilia and flagella associated protein 54	Cytoplasm	other
CFH	complement factor H	Extracellular Space	other
CHD6	chromodomain helicase DNA binding protein 6	Nucleus	enzyme
CHPF	chondroitin polymerizing factor	Cytoplasm	enzyme
CLEC16A	C-type lectin domain containing 16A	Cytoplasm	other
CLEC17A	C-type lectin domain containing 17A	Plasma Membrane	other
CLEC20A	C-type lectin domain containing 20A	Other	other
CLIP3	CAP-Gly domain containing linker protein 3	Plasma Membrane	other
CNOT6	CCR4-NOT transcription complex subunit 6	Nucleus	enzyme
CNTN6	contactin 6	Plasma Membrane	enzyme
COL4A3	collagen type IV alpha 3 chain	Extracellular Space	other
CR1	complement C3b/C4b receptor 1 (Knops blood group)	Plasma Membrane	transmembrane receptor
CRACDL	CRACD like	Other	other
CSF3R	colony stimulating factor 3 receptor	Plasma Membrane	transmembrane receptor
CSMD3	CUB and Sushi multiple domains 3	Plasma Membrane	enzyme
CTRL	chymotrypsin like	Extracellular Space	peptidase
CUBN	cubilin	Plasma Membrane	transmembrane receptor
DCAF10	DDB1 and CUL4 associated factor 10	Nucleus	other
DCHS1	dachsous cadherin-related 1	Plasma Membrane	other
DENND4B	DENN domain containing 4B	Extracellular Space	other
DEPDC5	DEP domain containing 5, GATOR1 subcomplex subunit	Cytoplasm	other
DGKA	diacylglycerol kinase alpha	Cytoplasm	kinase
DHX34	DExH-box helicase 34	Other	enzyme
DISP3	dispatched RND transporter family member 3	Cytoplasm	other
DMBT1	deleted in malignant brain tumors 1	Plasma Membrane	transmembrane receptor
DMXL1	Dmx like 1	Extracellular Space	other
DMXL2	Dmx like 2	Cytoplasm	other
DNAH1	dynein axonemal heavy chain 1	Extracellular Space	other
DNAH14	dynein axonemal heavy chain 14	Other	other
DNAH8	dynein axonemal heavy chain 8	Cytoplasm	enzyme
DNAJC5B	DnaJ heat shock protein family (Hsp40) member C5 beta	Other	transporter
DNER	delta/notch like EGF repeat containing	Plasma Membrane	transmembrane receptor
ECE2	endothelin converting enzyme 2	Plasma Membrane	peptidase
ECPAS	Ecm29 proteasome adaptor and scaffold	Cytoplasm	other
EGF	epidermal growth factor	Extracellular Space	growth factor
EGFEM1P	EGF like and EMI domain containing 1, pseudogene	Other	other
ELMOD1	ELMO domain containing 1	Other	other
ELP1	elongator acetyltransferase complex subunit 1	Cytoplasm	other
EMILIN1	elastin microfibril interfacer 1	Extracellular Space	other
EP400	E1A binding protein p400	Nucleus	other
ERBIN	erbb2 interacting protein	Cytoplasm	other
EYS	eyes shut homolog	Cytoplasm	other
F2RL1	F2R like trypsin receptor 1	Plasma Membrane	G-protein coupled receptor
FAM170A	family with sequence similarity 170 member A	Nucleus	other
FAM189A1	family with sequence similarity 189 member A1	Other	other
FAT3	FAT atypical cadherin 3	Plasma Membrane	other
FAT4	FAT atypical cadherin 4	Cytoplasm	other
FBN1	fibrillin 1	Extracellular Space	other
FBN3	fibrillin 3	Extracellular Space	other
FCGBP	Fc fragment of IgG binding protein	Extracellular Space	other
FCN1	ficolin 1	Extracellular Space	other
FGFR1	fibroblast growth factor receptor 1	Plasma Membrane	kinase
FHOD1	formin homology 2 domain containing 1	Cytoplasm	other
FLNB	filamin B	Cytoplasm	other
FLVCR2	FLVCR heme transporter 2	Plasma Membrane	transporter
FRAS1	Fraser extracellular matrix complex subunit 1	Extracellular Space	other
FUT10	fucosyltransferase 10	Cytoplasm	enzyme
GGT7	gamma-glutamyltransferase 7	Plasma Membrane	enzyme
GLI1	GLI family zinc finger 1	Nucleus	transcription regulator
GPR21	G protein-coupled receptor 21	Plasma Membrane	G-protein coupled receptor
GPRIN3	GPRIN family member 3	Other	other
GRIA4	glutamate ionotropic receptor AMPA type subunit 4	Plasma Membrane	ion channel
GRIN3B	glutamate ionotropic receptor NMDA type subunit 3B	Plasma Membrane	ion channel
GSC	goosecoid homeobox	Nucleus	transcription regulator
HAUS6	HAUS augmin like complex subunit 6	Cytoplasm	other
HERC1	HECT and RLD domain containing E3 ubiquitin protein ligase family member 1	Cytoplasm	other
HERC2	HECT and RLD domain containing E3 ubiquitin protein ligase 2	Cytoplasm	enzyme
HHLA1	HERV-H LTR-associating 1	Other	other
HSPBP1	HSPA (Hsp70) binding protein 1	Cytoplasm	other
HSPG2	heparan sulfate proteoglycan 2	Extracellular Space	enzyme
HUWE1	HECT, UBA and WWE domain containing E3 ubiquitin protein ligase 1	Nucleus	transcription regulator
IFT81	intraflagellar transport 81	Extracellular Space	other
IGH	immunoglobulin heavy locus	Other	other
IGHA1	immunoglobulin heavy constant alpha 1	Extracellular Space	other
IGSF10	immunoglobulin superfamily member 10	Extracellular Space	other
IGSF23	immunoglobulin superfamily member 23	Other	other
INHBE	inhibin subunit beta E	Extracellular Space	growth factor
INSR	insulin receptor	Plasma Membrane	kinase
IRX2	iroquois homeobox 2	Nucleus	transcription regulator
ISLR	immunoglobulin superfamily containing leucine rich repeat	Extracellular Space	other
ITGB2	integrin subunit beta 2	Plasma Membrane	transmembrane receptor
JAG2	jagged canonical Notch ligand 2	Extracellular Space	growth factor
KCNK5	potassium two pore domain channel subfamily K member 5	Plasma Membrane	ion channel
KIF26A	kinesin family member 26A	Cytoplasm	other
KIF2C	kinesin family member 2C	Nucleus	other
KIF4A	kinesin family member 4A	Nucleus	other
KLK15	kallikrein related peptidase 15	Extracellular Space	peptidase
KNL1	kinetochore scaffold 1	Nucleus	other
KPRP	keratinocyte proline rich protein	Cytoplasm	other
KRAS	KRAS proto-oncogene, GTPase	Cytoplasm	enzyme
LAMA1	laminin subunit alpha 1	Extracellular Space	other
LAMA2	laminin subunit alpha 2	Extracellular Space	other
LAMA5	laminin subunit alpha 5	Extracellular Space	other
LAMB2	laminin subunit beta 2	Extracellular Space	enzyme
LAMB4	laminin subunit beta 4	Other	other
LCE4A	late cornified envelope 4A	Other	other
LGI1	leucine rich glioma inactivated 1	Plasma Membrane	other
LIMD1	LIM domain containing 1	Nucleus	transcription regulator
LMF1	lipase maturation factor 1	Cytoplasm	other
LOC145845	uncharacterized LOC145845	Other	other
LPXN	leupaxin	Cytoplasm	transcription regulator
LRRC47	leucine rich repeat containing 47	Other	other
LTBP4	latent transforming growth factor beta binding protein 4	Extracellular Space	growth factor
LY75	lymphocyte antigen 75	Plasma Membrane	transmembrane receptor
LYPLA2	lysophospholipase 2	Cytoplasm	enzyme
LZTS2	leucine zipper tumor suppressor 2	Cytoplasm	other
MACROH2A1	macroH2A.1 histone	Nucleus	other
MAGEE1	MAGE family member E1	Plasma Membrane	other
MAGI2	membrane associated guanylate kinase, WW and PDZ domain containing 2	Plasma Membrane	enzyme
MAP4	microtubule associated protein 4	Cytoplasm	other
MAPKBP1	mitogen-activated protein kinase binding protein 1	Cytoplasm	other
MAST4	microtubule associated serine/threonine kinase family member 4	Other	kinase
MDFI	MyoD family inhibitor	Cytoplasm	other
MED20	mediator complex subunit 20	Nucleus	transcription regulator
MEGF10	multiple EGF like domains 10	Plasma Membrane	transmembrane receptor
MEGF11	multiple EGF like domains 11	Other	other
MEI1	meiotic double-stranded break formation protein 1	Other	other
MGAM2	maltase-glucoamylase 2 (putative)	Other	other
MLLT6	MLLT6, PHD finger containing	Nucleus	transcription regulator
MT1G	metallothionein 1G	Nucleus	other
MT-CO1	cytochrome c oxidase subunit I	Cytoplasm	enzyme
MT-CO2	cytochrome c oxidase subunit II	Cytoplasm	enzyme
MT-CYB	cytochrome b	Cytoplasm	enzyme
MT-ND1	NADH dehydrogenase subunit 1	Cytoplasm	enzyme
MT-ND5	NADH dehydrogenase subunit 5	Cytoplasm	enzyme
MT-ND5	NADH dehydrogenase subunit 5	Cytoplasm	enzyme
MUC16	mucin 16, cell surface associated	Cytoplasm	other
MUC17	mucin 17, cell surface associated	Plasma Membrane	other
MUC19	mucin 19, oligomeric	Cytoplasm	other
MUC2	mucin 2, oligomeric mucus/gel-forming	Extracellular Space	other
MUC3A	mucin 3A, cell surface associated	Other	other
MUC4	mucin 4, cell surface associated	Plasma Membrane	other
MUC5AC	mucin 5AC, oligomeric mucus/gel-forming	Cytoplasm	peptidase
MUC5B	mucin 5B, oligomeric mucus/gel-forming	Extracellular Space	peptidase
MUC6	mucin 6, oligomeric mucus/gel-forming	Extracellular Space	other
MXRA5	matrix remodeling associated 5	Extracellular Space	other
MYCBP2	MYC binding protein 2	Nucleus	enzyme
NACA	nascent polypeptide associated complex subunit alpha	Cytoplasm	transcription regulator
NAV2	neuron navigator 2	Nucleus	enzyme
NAV3	neuron navigator 3	Nucleus	other
NBEA	neurobeachin	Cytoplasm	other
NDUFAF3	NADH:ubiquinone oxidoreductase complex assembly factor 3	Nucleus	other
NEK2	NIMA related kinase 2	Cytoplasm	kinase
NEURL4	neuralized E3 ubiquitin protein ligase 4	Other	other
NFATC4	nuclear factor of activated T cells 4	Nucleus	transcription regulator
NFIX	nuclear factor I X	Nucleus	transcription regulator
NHSL2	NHS like 2	Other	other
NIBAN3	niban apoptosis regulator 3	Other	other
NOTCH3	notch receptor 3	Plasma Membrane	transcription regulator
NOTCH4	notch receptor 4	Plasma Membrane	transcription regulator
NOX1	NADPH oxidase 1	Cytoplasm	enzyme
NPAT	nuclear protein, coactivator of histone transcription	Nucleus	transcription regulator
NRG1	neuregulin 1	Plasma Membrane	growth factor
NTM	neurotrimin	Plasma Membrane	other
NTN4	netrin 4	Extracellular Space	other
NUMA1	nuclear mitotic apparatus protein 1	Nucleus	other
NUP214	nucleoporin 214	Nucleus	transporter
NUP98	nucleoporin 98 and 96 precursor	Nucleus	transporter
OBSCN	obscurin, cytoskeletal calmodulin and titin-interacting RhoGEF	Cytoplasm	kinase
OTOG	otogelin	Extracellular Space	enzyme
OVOS2	alpha-2-macroglobulin like 1 pseudogene	Extracellular Space	other
PAN3	poly(A) specific ribonuclease subunit PAN3	Cytoplasm	enzyme
PAPPA	pappalysin 1	Extracellular Space	peptidase
PAX7	paired box 7	Nucleus	transcription regulator
PCDHA11	protocadherin alpha 11	Plasma Membrane	other
PCDHGB5	protocadherin gamma subfamily B, 5	Cytoplasm	other
PCLO	piccolo presynaptic cytomatrix protein	Cytoplasm	transporter
PCSK5	proprotein convertase subtilisin/kexin type 5	Extracellular Space	peptidase
PCSK5	proprotein convertase subtilisin/kexin type 5	Extracellular Space	peptidase
PDE3B	phosphodiesterase 3B	Cytoplasm	enzyme
PDHX	pyruvate dehydrogenase complex component X	Cytoplasm	enzyme
PDLIM3	PDZ and LIM domain 3	Cytoplasm	other
PKHD1L1	PKHD1 like 1	Extracellular Space	other
PLAC8	placenta associated 8	Nucleus	other
PLB1	phospholipase B1	Cytoplasm	enzyme
PLCG1	phospholipase C gamma 1	Cytoplasm	enzyme
PLEKHA1	pleckstrin homology domain containing A1	Cytoplasm	other
PLEKHG1	pleckstrin homology and RhoGEF domain containing G1	Extracellular Space	other
PLXNB3	plexin B3	Plasma Membrane	transmembrane receptor
POSTN	periostin	Extracellular Space	other
POT1	protection of telomeres 1	Nucleus	other
POU2F2	POU class 2 homeobox 2	Nucleus	transcription regulator
PPFIBP2	PPFIA binding protein 2	Nucleus	phosphatase
PPP3R1	protein phosphatase 3 regulatory subunit B, alpha	Cytoplasm	phosphatase
PRG4	proteoglycan 4	Extracellular Space	other
PTPN22	protein tyrosine phosphatase non-receptor type 22	Cytoplasm	phosphatase
PTPN5	protein tyrosine phosphatase non-receptor type 5	Plasma Membrane	phosphatase
PTPRS	protein tyrosine phosphatase receptor type S	Plasma Membrane	phosphatase
PURA	purine rich element binding protein A	Nucleus	transcription regulator
RABEPK	Rab9 effector protein with kelch motifs	Cytoplasm	other
RASA1	RAS p21 protein activator 1	Cytoplasm	transporter
RBM23	RNA binding motif protein 23	Nucleus	other
RELN	reelin	Extracellular Space	peptidase
RIC1	RIC1 homolog, RAB6A GEF complex partner 1	Cytoplasm	other
RIMS1	regulating synaptic membrane exocytosis 1	Plasma Membrane	other
RNF111	ring finger protein 111	Nucleus	enzyme
RNF19A	ring finger protein 19A, RBR E3 ubiquitin protein ligase	Nucleus	enzyme
RNF19B	ring finger protein 19B	Cytoplasm	enzyme
RNF43	ring finger protein 43	Plasma Membrane	enzyme
RTL9	retrotransposon Gag like 9	Other	other
RYR2	ryanodine receptor 2	Plasma Membrane	ion channel
SACS	sacsin molecular chaperone	Plasma Membrane	other
SAP30BP	SAP30 binding protein	Nucleus	transcription regulator
SCUBE1	signal peptide, CUB domain and EGF like domain containing 1	Plasma Membrane	transmembrane receptor
SDK2	sidekick cell adhesion molecule 2	Plasma Membrane	other
SELENOI	selenoprotein I	Cytoplasm	enzyme
SELL	selectin L	Plasma Membrane	transmembrane receptor
SFTPC	surfactant protein C	Extracellular Space	other
SGSM2	small G protein signaling modulator 2	Cytoplasm	other
SIGLEC9	sialic acid binding Ig like lectin 9	Plasma Membrane	other
SLC22A13	solute carrier family 22 member 13	Plasma Membrane	transporter
SLC26A5	solute carrier family 26 member 5	Plasma Membrane	transporter
SLC39A4	solute carrier family 39 member 4	Plasma Membrane	transporter
SLC7A11	solute carrier family 7 member 11	Plasma Membrane	transporter
SLCO3A1	solute carrier organic anion transporter family member 3A1	Plasma Membrane	transporter
SLIT3	slit guidance ligand 3	Extracellular Space	other
SLITRK5	SLIT and NTRK like family member 5	Plasma Membrane	other
SMC2	structural maintenance of chromosomes 2	Nucleus	transporter
SMYD4	SET and MYND domain containing 4	Other	other
SOS2	SOS Ras/Rho guanine nucleotide exchange factor 2	Cytoplasm	other
SP2	Sp2 transcription factor	Nucleus	transcription regulator
SS18L1	SS18L1 subunit of BAF chromatin remodeling complex	Nucleus	transcription regulator
SSPOP	SCO-spondin, pseudogene	Cytoplasm	other
STAB1	stabilin 1	Plasma Membrane	transporter
STARD9	StAR related lipid transfer domain containing 9	Cytoplasm	other
SVEP1	sushi, von Willebrand factor type A, EGF and pentraxin domain containing 1	Cytoplasm	other
SYNE2	spectrin repeat containing nuclear envelope protein 2	Nucleus	other
TENM1	teneurin transmembrane protein 1	Plasma Membrane	transmembrane receptor
TENM3	teneurin transmembrane protein 3	Plasma Membrane	other
TENM4	teneurin transmembrane protein 4	Plasma Membrane	other
TGFBR2	transforming growth factor beta receptor 2	Plasma Membrane	kinase
TGFBR3L	transforming growth factor beta receptor 3 like	Other	other
TLN2	talin 2	Nucleus	other
TMEM132A	transmembrane protein 132A	Cytoplasm	other
TMEM59	transmembrane protein 59	Plasma Membrane	peptidase
TNFRSF10D	TNF receptor superfamily member 10d	Plasma Membrane	transmembrane receptor
TNFRSF8	TNF receptor superfamily member 8	Plasma Membrane	transmembrane receptor
TPM1	tropomyosin 1	Cytoplasm	other
TPTE2	transmembrane phosphoinositide 3-phosphatase and tensin homolog 2	Cytoplasm	phosphatase
TRIM33	tripartite motif containing 33	Nucleus	transcription regulator
TTLL7	tubulin tyrosine ligase like 7	Cytoplasm	enzyme
TTN	titin	Cytoplasm	kinase
TVP23B	trans-golgi network vesicle protein 23 homolog B	Other	other
UBAP2	ubiquitin associated protein 2	Cytoplasm	other
UBR4	ubiquitin protein ligase E3 component n-recognin 4	Nucleus	enzyme
USH2A	usherin	Extracellular Space	other
USP3	ubiquitin specific peptidase 3	Cytoplasm	peptidase
USP37	ubiquitin specific peptidase 37	Nucleus	peptidase
USP53	ubiquitin specific peptidase 53	Extracellular Space	enzyme
UTP20	UTP20 small subunit processome component	Nucleus	other
VLDLR	very low density lipoprotein receptor	Plasma Membrane	transporter
VWF	von Willebrand factor	Extracellular Space	other
WAPL	WAPL cohesin release factor	Nucleus	other
WDR62	WD repeat domain 62	Nucleus	other
WDR90	WD repeat domain 90	Cytoplasm	other
WNT6	Wnt family member 6	Extracellular Space	other
ZBTB18	zinc finger and BTB domain containing 18	Nucleus	transcription regulator
ZMYM3	zinc finger MYM-type containing 3	Nucleus	other
ZNF131	zinc finger protein 131	Nucleus	transcription regulator
ZNF841	zinc finger protein 841	Other	other
