# Supplementary material for: The Role of Insulin-like Peptide in Maintaining Hemolymph Glucose Homeostasis in the Pacific White Shrimp Litopenaeus vannamei
Source: Int J Mol Sci. 2022 Mar 17;23(6):3268. doi: 10.3390/ijms23063268 (PMC8948857; doi:10.3390/ijms23063268)
Supplement: Supplementary file 1 [file ijms-23-03268-s001.zip › Supplementary SB. File SB1. Sera as used in LOOCV Figures.xlsx]

## Sheet: De-Identified Patients by LOOCV
de-identified sera/patient number	test group	LOOCV test	Figure		de-identified sera/patient number	test group	LOOCV test	Figure		de-identified sera/patient number	test group	LOOCV test	Figure		de-identified sera/patient number	test group	LOOCV test	Figure		de-identified sera/patient number	test group	LOOCV test	Figure		de-identified sera/patient number	test group	LOOCV test	Figure		de-identified sera/patient number	test group	LOOCV test	Figure
35	Endometrial Cancer Stages I, II, III & IV, N=40	Endometrial Cancer Stages I, II, IIIC & IV vs Benign Gynecology	1C & 1D		35	Endometrial Cancer Stages I & II, N=20	Endometrial Cancer Stages I & II vs Endometrial Cancer Stages IIIC & IV	2C		55	Endometrial Cancer Stages III & IV, N=20	Endometrial Cancer Stages IIIC & IV vs Benign Gynecology	2B		35	Endometrial Cancer Stages I & II, N=20	Endometrial Cancer Stages I & II vs Benign Gynecology	2A		1	Ovarian Cancer Stages I, N=16; II, N=5; III,N=12; IV,N=2	Endometrial Cancer Stages I, II, IIIC & IV vs Ovarian Cancer Stages I, II, III & IV	2D		21	Ovarian Cancer Stages III,N=12; IV,N=2	Ovarian cancer stages III & IV vs Endometrial Cancer Stages III & IV	Supplemental		1	Ovarian Cancer Stages I, N=16; II, N=5	Ovarian cancer stages I & II vs Endometrial Cancer Stages I & II	Supplemental
36	Endometrial Cancer Stages I, II, III & IV, N=40	Endometrial Cancer Stages I, II, IIIC & IV vs Benign Gynecology	1C & 1D		36	Endometrial Cancer Stages I & II, N=20	Endometrial Cancer Stages I & II vs Endometrial Cancer Stages IIIC & IV	2C		56	Endometrial Cancer Stages III & IV, N=20	Endometrial Cancer Stages IIIC & IV vs Benign Gynecology	2B		36	Endometrial Cancer Stages I & II, N=20	Endometrial Cancer Stages I & II vs Benign Gynecology	2A		2	Ovarian Cancer Stages I, N=16; II, N=5; III,N=12; IV,N=2	Endometrial Cancer Stages I, II, IIIC & IV vs Ovarian Cancer Stages I, II, III & IV	2D		22	Ovarian Cancer Stages III,N=12; IV,N=2	Ovarian cancer stages III & IV vs Endometrial Cancer Stages III & IV	Supplemental		2	Ovarian Cancer Stages I, N=16; II, N=5	Ovarian cancer stages I & II vs Endometrial Cancer Stages I & II	Supplemental
37	Endometrial Cancer Stages I, II, III & IV, N=40	Endometrial Cancer Stages I, II, IIIC & IV vs Benign Gynecology	1C & 1D		37	Endometrial Cancer Stages I & II, N=20	Endometrial Cancer Stages I & II vs Endometrial Cancer Stages IIIC & IV	2C		57	Endometrial Cancer Stages III & IV, N=20	Endometrial Cancer Stages IIIC & IV vs Benign Gynecology	2B		37	Endometrial Cancer Stages I & II, N=20	Endometrial Cancer Stages I & II vs Benign Gynecology	2A		3	Ovarian Cancer Stages I, N=16; II, N=5; III,N=12; IV,N=2	Endometrial Cancer Stages I, II, IIIC & IV vs Ovarian Cancer Stages I, II, III & IV	2D		23	Ovarian Cancer Stages III,N=12; IV,N=2	Ovarian cancer stages III & IV vs Endometrial Cancer Stages III & IV	Supplemental		3	Ovarian Cancer Stages I, N=16; II, N=5	Ovarian cancer stages I & II vs Endometrial Cancer Stages I & II	Supplemental
38	Endometrial Cancer Stages I, II, III & IV, N=40	Endometrial Cancer Stages I, II, IIIC & IV vs Benign Gynecology	1C & 1D		38	Endometrial Cancer Stages I & II, N=20	Endometrial Cancer Stages I & II vs Endometrial Cancer Stages IIIC & IV	2C		58	Endometrial Cancer Stages III & IV, N=20	Endometrial Cancer Stages IIIC & IV vs Benign Gynecology	2B		38	Endometrial Cancer Stages I & II, N=20	Endometrial Cancer Stages I & II vs Benign Gynecology	2A		4	Ovarian Cancer Stages I, N=16; II, N=5; III,N=12; IV,N=2	Endometrial Cancer Stages I, II, IIIC & IV vs Ovarian Cancer Stages I, II, III & IV	2D		24	Ovarian Cancer Stages III,N=12; IV,N=2	Ovarian cancer stages III & IV vs Endometrial Cancer Stages III & IV	Supplemental		4	Ovarian Cancer Stages I, N=16; II, N=5	Ovarian cancer stages I & II vs Endometrial Cancer Stages I & II	Supplemental
39	Endometrial Cancer Stages I, II, III & IV, N=40	Endometrial Cancer Stages I, II, IIIC & IV vs Benign Gynecology	1C & 1D		39	Endometrial Cancer Stages I & II, N=20	Endometrial Cancer Stages I & II vs Endometrial Cancer Stages IIIC & IV	2C		59	Endometrial Cancer Stages III & IV, N=20	Endometrial Cancer Stages IIIC & IV vs Benign Gynecology	2B		39	Endometrial Cancer Stages I & II, N=20	Endometrial Cancer Stages I & II vs Benign Gynecology	2A		5	Ovarian Cancer Stages I, N=16; II, N=5; III,N=12; IV,N=2	Endometrial Cancer Stages I, II, IIIC & IV vs Ovarian Cancer Stages I, II, III & IV	2D		25	Ovarian Cancer Stages III,N=12; IV,N=2	Ovarian cancer stages III & IV vs Endometrial Cancer Stages III & IV	Supplemental		5	Ovarian Cancer Stages I, N=16; II, N=5	Ovarian cancer stages I & II vs Endometrial Cancer Stages I & II	Supplemental
40	Endometrial Cancer Stages I, II, III & IV, N=40	Endometrial Cancer Stages I, II, IIIC & IV vs Benign Gynecology	1C & 1D		40	Endometrial Cancer Stages I & II, N=20	Endometrial Cancer Stages I & II vs Endometrial Cancer Stages IIIC & IV	2C		60	Endometrial Cancer Stages III & IV, N=20	Endometrial Cancer Stages IIIC & IV vs Benign Gynecology	2B		40	Endometrial Cancer Stages I & II, N=20	Endometrial Cancer Stages I & II vs Benign Gynecology	2A		6	Ovarian Cancer Stages I, N=16; II, N=5; III,N=12; IV,N=2	Endometrial Cancer Stages I, II, IIIC & IV vs Ovarian Cancer Stages I, II, III & IV	2D		26	Ovarian Cancer Stages III,N=12; IV,N=2	Ovarian cancer stages III & IV vs Endometrial Cancer Stages III & IV	Supplemental		6	Ovarian Cancer Stages I, N=16; II, N=5	Ovarian cancer stages I & II vs Endometrial Cancer Stages I & II	Supplemental
41	Endometrial Cancer Stages I, II, III & IV, N=40	Endometrial Cancer Stages I, II, IIIC & IV vs Benign Gynecology	1C & 1D		41	Endometrial Cancer Stages I & II, N=20	Endometrial Cancer Stages I & II vs Endometrial Cancer Stages IIIC & IV	2C		61	Endometrial Cancer Stages III & IV, N=20	Endometrial Cancer Stages IIIC & IV vs Benign Gynecology	2B		41	Endometrial Cancer Stages I & II, N=20	Endometrial Cancer Stages I & II vs Benign Gynecology	2A		7	Ovarian Cancer Stages I, N=16; II, N=5; III,N=12; IV,N=2	Endometrial Cancer Stages I, II, IIIC & IV vs Ovarian Cancer Stages I, II, III & IV	2D		27	Ovarian Cancer Stages III,N=12; IV,N=2	Ovarian cancer stages III & IV vs Endometrial Cancer Stages III & IV	Supplemental		7	Ovarian Cancer Stages I, N=16; II, N=5	Ovarian cancer stages I & II vs Endometrial Cancer Stages I & II	Supplemental
42	Endometrial Cancer Stages I, II, III & IV, N=40	Endometrial Cancer Stages I, II, IIIC & IV vs Benign Gynecology	1C & 1D		42	Endometrial Cancer Stages I & II, N=20	Endometrial Cancer Stages I & II vs Endometrial Cancer Stages IIIC & IV	2C		62	Endometrial Cancer Stages III & IV, N=20	Endometrial Cancer Stages IIIC & IV vs Benign Gynecology	2B		42	Endometrial Cancer Stages I & II, N=20	Endometrial Cancer Stages I & II vs Benign Gynecology	2A		8	Ovarian Cancer Stages I, N=16; II, N=5; III,N=12; IV,N=2	Endometrial Cancer Stages I, II, IIIC & IV vs Ovarian Cancer Stages I, II, III & IV	2D		28	Ovarian Cancer Stages III,N=12; IV,N=2	Ovarian cancer stages III & IV vs Endometrial Cancer Stages III & IV	Supplemental		8	Ovarian Cancer Stages I, N=16; II, N=5	Ovarian cancer stages I & II vs Endometrial Cancer Stages I & II	Supplemental
43	Endometrial Cancer Stages I, II, III & IV, N=40	Endometrial Cancer Stages I, II, IIIC & IV vs Benign Gynecology	1C & 1D		43	Endometrial Cancer Stages I & II, N=20	Endometrial Cancer Stages I & II vs Endometrial Cancer Stages IIIC & IV	2C		63	Endometrial Cancer Stages III & IV, N=20	Endometrial Cancer Stages IIIC & IV vs Benign Gynecology	2B		43	Endometrial Cancer Stages I & II, N=20	Endometrial Cancer Stages I & II vs Benign Gynecology	2A		9	Ovarian Cancer Stages I, N=16; II, N=5; III,N=12; IV,N=2	Endometrial Cancer Stages I, II, IIIC & IV vs Ovarian Cancer Stages I, II, III & IV	2D		29	Ovarian Cancer Stages III,N=12; IV,N=2	Ovarian cancer stages III & IV vs Endometrial Cancer Stages III & IV	Supplemental		9	Ovarian Cancer Stages I, N=16; II, N=5	Ovarian cancer stages I & II vs Endometrial Cancer Stages I & II	Supplemental
44	Endometrial Cancer Stages I, II, III & IV, N=40	Endometrial Cancer Stages I, II, IIIC & IV vs Benign Gynecology	1C & 1D		44	Endometrial Cancer Stages I & II, N=20	Endometrial Cancer Stages I & II vs Endometrial Cancer Stages IIIC & IV	2C		64	Endometrial Cancer Stages III & IV, N=20	Endometrial Cancer Stages IIIC & IV vs Benign Gynecology	2B		44	Endometrial Cancer Stages I & II, N=20	Endometrial Cancer Stages I & II vs Benign Gynecology	2A		10	Ovarian Cancer Stages I, N=16; II, N=5; III,N=12; IV,N=2	Endometrial Cancer Stages I, II, IIIC & IV vs Ovarian Cancer Stages I, II, III & IV	2D		30	Ovarian Cancer Stages III,N=12; IV,N=2	Ovarian cancer stages III & IV vs Endometrial Cancer Stages III & IV	Supplemental		10	Ovarian Cancer Stages I, N=16; II, N=5	Ovarian cancer stages I & II vs Endometrial Cancer Stages I & II	Supplemental
45	Endometrial Cancer Stages I, II, III & IV, N=40	Endometrial Cancer Stages I, II, IIIC & IV vs Benign Gynecology	1C & 1D		45	Endometrial Cancer Stages I & II, N=20	Endometrial Cancer Stages I & II vs Endometrial Cancer Stages IIIC & IV	2C		65	Endometrial Cancer Stages III & IV, N=20	Endometrial Cancer Stages IIIC & IV vs Benign Gynecology	2B		45	Endometrial Cancer Stages I & II, N=20	Endometrial Cancer Stages I & II vs Benign Gynecology	2A		11	Ovarian Cancer Stages I, N=16; II, N=5; III,N=12; IV,N=2	Endometrial Cancer Stages I, II, IIIC & IV vs Ovarian Cancer Stages I, II, III & IV	2D		31	Ovarian Cancer Stages III,N=12; IV,N=2	Ovarian cancer stages III & IV vs Endometrial Cancer Stages III & IV	Supplemental		11	Ovarian Cancer Stages I, N=16; II, N=5	Ovarian cancer stages I & II vs Endometrial Cancer Stages I & II	Supplemental
46	Endometrial Cancer Stages I, II, III & IV, N=40	Endometrial Cancer Stages I, II, IIIC & IV vs Benign Gynecology	1C & 1D		46	Endometrial Cancer Stages I & II, N=20	Endometrial Cancer Stages I & II vs Endometrial Cancer Stages IIIC & IV	2C		66	Endometrial Cancer Stages III & IV, N=20	Endometrial Cancer Stages IIIC & IV vs Benign Gynecology	2B		46	Endometrial Cancer Stages I & II, N=20	Endometrial Cancer Stages I & II vs Benign Gynecology	2A		12	Ovarian Cancer Stages I, N=16; II, N=5; III,N=12; IV,N=2	Endometrial Cancer Stages I, II, IIIC & IV vs Ovarian Cancer Stages I, II, III & IV	2D		32	Ovarian Cancer Stages III,N=12; IV,N=2	Ovarian cancer stages III & IV vs Endometrial Cancer Stages III & IV	Supplemental		12	Ovarian Cancer Stages I, N=16; II, N=5	Ovarian cancer stages I & II vs Endometrial Cancer Stages I & II	Supplemental
47	Endometrial Cancer Stages I, II, III & IV, N=40	Endometrial Cancer Stages I, II, IIIC & IV vs Benign Gynecology	1C & 1D		47	Endometrial Cancer Stages I & II, N=20	Endometrial Cancer Stages I & II vs Endometrial Cancer Stages IIIC & IV	2C		67	Endometrial Cancer Stages III & IV, N=20	Endometrial Cancer Stages IIIC & IV vs Benign Gynecology	2B		47	Endometrial Cancer Stages I & II, N=20	Endometrial Cancer Stages I & II vs Benign Gynecology	2A		13	Ovarian Cancer Stages I, N=16; II, N=5; III,N=12; IV,N=2	Endometrial Cancer Stages I, II, IIIC & IV vs Ovarian Cancer Stages I, II, III & IV	2D		33	Ovarian Cancer Stages III,N=12; IV,N=2	Ovarian cancer stages III & IV vs Endometrial Cancer Stages III & IV	Supplemental		13	Ovarian Cancer Stages I, N=16; II, N=5	Ovarian cancer stages I & II vs Endometrial Cancer Stages I & II	Supplemental
48	Endometrial Cancer Stages I, II, III & IV, N=40	Endometrial Cancer Stages I, II, IIIC & IV vs Benign Gynecology	1C & 1D		48	Endometrial Cancer Stages I & II, N=20	Endometrial Cancer Stages I & II vs Endometrial Cancer Stages IIIC & IV	2C		68	Endometrial Cancer Stages III & IV, N=20	Endometrial Cancer Stages IIIC & IV vs Benign Gynecology	2B		48	Endometrial Cancer Stages I & II, N=20	Endometrial Cancer Stages I & II vs Benign Gynecology	2A		14	Ovarian Cancer Stages I, N=16; II, N=5; III,N=12; IV,N=2	Endometrial Cancer Stages I, II, IIIC & IV vs Ovarian Cancer Stages I, II, III & IV	2D		34	Ovarian Cancer Stages III,N=12; IV,N=2	Ovarian cancer stages III & IV vs Endometrial Cancer Stages III & IV	Supplemental		14	Ovarian Cancer Stages I, N=16; II, N=5	Ovarian cancer stages I & II vs Endometrial Cancer Stages I & II	Supplemental
49	Endometrial Cancer Stages I, II, III & IV, N=40	Endometrial Cancer Stages I, II, IIIC & IV vs Benign Gynecology	1C & 1D		49	Endometrial Cancer Stages I & II, N=20	Endometrial Cancer Stages I & II vs Endometrial Cancer Stages IIIC & IV	2C		69	Endometrial Cancer Stages III & IV, N=20	Endometrial Cancer Stages IIIC & IV vs Benign Gynecology	2B		49	Endometrial Cancer Stages I & II, N=20	Endometrial Cancer Stages I & II vs Benign Gynecology	2A		15	Ovarian Cancer Stages I, N=16; II, N=5; III,N=12; IV,N=2	Endometrial Cancer Stages I, II, IIIC & IV vs Ovarian Cancer Stages I, II, III & IV	2D		55	Endometrial Cancer Stages III, N=19; IV, N=1	Ovarian cancer stages III & IV vs Endometrial Cancer Stages III & IV	Supplemental		15	Ovarian Cancer Stages I, N=16; II, N=5	Ovarian cancer stages I & II vs Endometrial Cancer Stages I & II	Supplemental
50	Endometrial Cancer Stages I, II, III & IV, N=40	Endometrial Cancer Stages I, II, IIIC & IV vs Benign Gynecology	1C & 1D		50	Endometrial Cancer Stages I & II, N=20	Endometrial Cancer Stages I & II vs Endometrial Cancer Stages IIIC & IV	2C		70	Endometrial Cancer Stages III & IV, N=20	Endometrial Cancer Stages IIIC & IV vs Benign Gynecology	2B		50	Endometrial Cancer Stages I & II, N=20	Endometrial Cancer Stages I & II vs Benign Gynecology	2A		16	Ovarian Cancer Stages I, N=16; II, N=5; III,N=12; IV,N=2	Endometrial Cancer Stages I, II, IIIC & IV vs Ovarian Cancer Stages I, II, III & IV	2D		56	Endometrial Cancer Stages III, N=19; IV, N=1	Ovarian cancer stages III & IV vs Endometrial Cancer Stages III & IV	Supplemental		16	Ovarian Cancer Stages I, N=16; II, N=5	Ovarian cancer stages I & II vs Endometrial Cancer Stages I & II	Supplemental
51	Endometrial Cancer Stages I, II, III & IV, N=40	Endometrial Cancer Stages I, II, IIIC & IV vs Benign Gynecology	1C & 1D		51	Endometrial Cancer Stages I & II, N=20	Endometrial Cancer Stages I & II vs Endometrial Cancer Stages IIIC & IV	2C		71	Endometrial Cancer Stages III & IV, N=20	Endometrial Cancer Stages IIIC & IV vs Benign Gynecology	2B		51	Endometrial Cancer Stages I & II, N=20	Endometrial Cancer Stages I & II vs Benign Gynecology	2A		17	Ovarian Cancer Stages I, N=16; II, N=5; III,N=12; IV,N=2	Endometrial Cancer Stages I, II, IIIC & IV vs Ovarian Cancer Stages I, II, III & IV	2D		57	Endometrial Cancer Stages III, N=19; IV, N=1	Ovarian cancer stages III & IV vs Endometrial Cancer Stages III & IV	Supplemental		17	Ovarian Cancer Stages I, N=16; II, N=5	Ovarian cancer stages I & II vs Endometrial Cancer Stages I & II	Supplemental
52	Endometrial Cancer Stages I, II, III & IV, N=40	Endometrial Cancer Stages I, II, IIIC & IV vs Benign Gynecology	1C & 1D		52	Endometrial Cancer Stages I & II, N=20	Endometrial Cancer Stages I & II vs Endometrial Cancer Stages IIIC & IV	2C		72	Endometrial Cancer Stages III & IV, N=20	Endometrial Cancer Stages IIIC & IV vs Benign Gynecology	2B		52	Endometrial Cancer Stages I & II, N=20	Endometrial Cancer Stages I & II vs Benign Gynecology	2A		18	Ovarian Cancer Stages I, N=16; II, N=5; III,N=12; IV,N=2	Endometrial Cancer Stages I, II, IIIC & IV vs Ovarian Cancer Stages I, II, III & IV	2D		58	Endometrial Cancer Stages III, N=19; IV, N=1	Ovarian cancer stages III & IV vs Endometrial Cancer Stages III & IV	Supplemental		18	Ovarian Cancer Stages I, N=16; II, N=5	Ovarian cancer stages I & II vs Endometrial Cancer Stages I & II	Supplemental
53	Endometrial Cancer Stages I, II, III & IV, N=40	Endometrial Cancer Stages I, II, IIIC & IV vs Benign Gynecology	1C & 1D		53	Endometrial Cancer Stages I & II, N=20	Endometrial Cancer Stages I & II vs Endometrial Cancer Stages IIIC & IV	2C		73	Endometrial Cancer Stages III & IV, N=20	Endometrial Cancer Stages IIIC & IV vs Benign Gynecology	2B		53	Endometrial Cancer Stages I & II, N=20	Endometrial Cancer Stages I & II vs Benign Gynecology	2A		19	Ovarian Cancer Stages I, N=16; II, N=5; III,N=12; IV,N=2	Endometrial Cancer Stages I, II, IIIC & IV vs Ovarian Cancer Stages I, II, III & IV	2D		59	Endometrial Cancer Stages III, N=19; IV, N=1	Ovarian cancer stages III & IV vs Endometrial Cancer Stages III & IV	Supplemental		19	Ovarian Cancer Stages I, N=16; II, N=5	Ovarian cancer stages I & II vs Endometrial Cancer Stages I & II	Supplemental
54	Endometrial Cancer Stages I, II, III & IV, N=40	Endometrial Cancer Stages I, II, IIIC & IV vs Benign Gynecology	1C & 1D		54	Endometrial Cancer Stages I & II, N=20	Endometrial Cancer Stages I & II vs Endometrial Cancer Stages IIIC & IV	2C		74	Endometrial Cancer Stages III & IV, N=20	Endometrial Cancer Stages IIIC & IV vs Benign Gynecology	2B		54	Endometrial Cancer Stages I & II, N=20	Endometrial Cancer Stages I & II vs Benign Gynecology	2A		20	Ovarian Cancer Stages I, N=16; II, N=5; III,N=12; IV,N=2	Endometrial Cancer Stages I, II, IIIC & IV vs Ovarian Cancer Stages I, II, III & IV	2D		60	Endometrial Cancer Stages III, N=19; IV, N=1	Ovarian cancer stages III & IV vs Endometrial Cancer Stages III & IV	Supplemental		20	Ovarian Cancer Stages I, N=16; II, N=5	Ovarian cancer stages I & II vs Endometrial Cancer Stages I & II	Supplemental
69	Endometrial Cancer Stages I, II, III & IV, N=40	Endometrial Cancer Stages I, II, IIIC & IV vs Benign Gynecology	1C & 1D		69	Endometrial Cancer Stages III & IV, N=20	Endometrial Cancer Stages I & II vs Endometrial Cancer Stages IIIC & IV	2C		75	Abonrmal Endometrial Not-Cancer, N=20	Endometrial Cancer Stages IIIC & IV vs Benign Gynecology	2B		75	Abonrmal Endometrial Not-Cancer, N=20	Endometrial Cancer Stages I & II vs Benign Gynecology	2A		21	Ovarian Cancer Stages I, N=16; II, N=5; III,N=12; IV,N=2	Endometrial Cancer Stages I, II, IIIC & IV vs Ovarian Cancer Stages I, II, III & IV	2D		61	Endometrial Cancer Stages III, N=19; IV, N=1	Ovarian cancer stages III & IV vs Endometrial Cancer Stages III & IV	Supplemental		35	Endometrial Cancer Stages I, N=19; II, N=1	Ovarian cancer stages I & II vs Endometrial Cancer Stages I & II	Supplemental
68	Endometrial Cancer Stages I, II, III & IV, N=40	Endometrial Cancer Stages I, II, IIIC & IV vs Benign Gynecology	1C & 1D		68	Endometrial Cancer Stages III & IV, N=20	Endometrial Cancer Stages I & II vs Endometrial Cancer Stages IIIC & IV	2C		76	Abonrmal Endometrial Not-Cancer, N=20	Endometrial Cancer Stages IIIC & IV vs Benign Gynecology	2B		76	Abonrmal Endometrial Not-Cancer, N=20	Endometrial Cancer Stages I & II vs Benign Gynecology	2A		22	Ovarian Cancer Stages I, N=16; II, N=5; III,N=12; IV,N=2	Endometrial Cancer Stages I, II, IIIC & IV vs Ovarian Cancer Stages I, II, III & IV	2D		62	Endometrial Cancer Stages III, N=19; IV, N=1	Ovarian cancer stages III & IV vs Endometrial Cancer Stages III & IV	Supplemental		36	Endometrial Cancer Stages I, N=19; II, N=1	Ovarian cancer stages I & II vs Endometrial Cancer Stages I & II	Supplemental
72	Endometrial Cancer Stages I, II, III & IV, N=40	Endometrial Cancer Stages I, II, IIIC & IV vs Benign Gynecology	1C & 1D		72	Endometrial Cancer Stages III & IV, N=20	Endometrial Cancer Stages I & II vs Endometrial Cancer Stages IIIC & IV	2C		77	Abonrmal Endometrial Not-Cancer, N=20	Endometrial Cancer Stages IIIC & IV vs Benign Gynecology	2B		77	Abonrmal Endometrial Not-Cancer, N=20	Endometrial Cancer Stages I & II vs Benign Gynecology	2A		23	Ovarian Cancer Stages I, N=16; II, N=5; III,N=12; IV,N=2	Endometrial Cancer Stages I, II, IIIC & IV vs Ovarian Cancer Stages I, II, III & IV	2D		63	Endometrial Cancer Stages III, N=19; IV, N=1	Ovarian cancer stages III & IV vs Endometrial Cancer Stages III & IV	Supplemental		37	Endometrial Cancer Stages I, N=19; II, N=1	Ovarian cancer stages I & II vs Endometrial Cancer Stages I & II	Supplemental
73	Endometrial Cancer Stages I, II, III & IV, N=40	Endometrial Cancer Stages I, II, IIIC & IV vs Benign Gynecology	1C & 1D		73	Endometrial Cancer Stages III & IV, N=20	Endometrial Cancer Stages I & II vs Endometrial Cancer Stages IIIC & IV	2C		78	Abonrmal Endometrial Not-Cancer, N=20	Endometrial Cancer Stages IIIC & IV vs Benign Gynecology	2B		78	Abonrmal Endometrial Not-Cancer, N=20	Endometrial Cancer Stages I & II vs Benign Gynecology	2A		24	Ovarian Cancer Stages I, N=16; II, N=5; III,N=12; IV,N=2	Endometrial Cancer Stages I, II, IIIC & IV vs Ovarian Cancer Stages I, II, III & IV	2D		64	Endometrial Cancer Stages III, N=19; IV, N=1	Ovarian cancer stages III & IV vs Endometrial Cancer Stages III & IV	Supplemental		38	Endometrial Cancer Stages I, N=19; II, N=1	Ovarian cancer stages I & II vs Endometrial Cancer Stages I & II	Supplemental
55	Endometrial Cancer Stages I, II, III & IV, N=40	Endometrial Cancer Stages I, II, IIIC & IV vs Benign Gynecology	1C & 1D		55	Endometrial Cancer Stages III & IV, N=20	Endometrial Cancer Stages I & II vs Endometrial Cancer Stages IIIC & IV	2C		79	Abonrmal Endometrial Not-Cancer, N=20	Endometrial Cancer Stages IIIC & IV vs Benign Gynecology	2B		79	Abonrmal Endometrial Not-Cancer, N=20	Endometrial Cancer Stages I & II vs Benign Gynecology	2A		25	Ovarian Cancer Stages I, N=16; II, N=5; III,N=12; IV,N=2	Endometrial Cancer Stages I, II, IIIC & IV vs Ovarian Cancer Stages I, II, III & IV	2D		65	Endometrial Cancer Stages III, N=19; IV, N=1	Ovarian cancer stages III & IV vs Endometrial Cancer Stages III & IV	Supplemental		39	Endometrial Cancer Stages I, N=19; II, N=1	Ovarian cancer stages I & II vs Endometrial Cancer Stages I & II	Supplemental
56	Endometrial Cancer Stages I, II, III & IV, N=40	Endometrial Cancer Stages I, II, IIIC & IV vs Benign Gynecology	1C & 1D		56	Endometrial Cancer Stages III & IV, N=20	Endometrial Cancer Stages I & II vs Endometrial Cancer Stages IIIC & IV	2C		80	Abonrmal Endometrial Not-Cancer, N=20	Endometrial Cancer Stages IIIC & IV vs Benign Gynecology	2B		80	Abonrmal Endometrial Not-Cancer, N=20	Endometrial Cancer Stages I & II vs Benign Gynecology	2A		26	Ovarian Cancer Stages I, N=16; II, N=5; III,N=12; IV,N=2	Endometrial Cancer Stages I, II, IIIC & IV vs Ovarian Cancer Stages I, II, III & IV	2D		66	Endometrial Cancer Stages III, N=19; IV, N=1	Ovarian cancer stages III & IV vs Endometrial Cancer Stages III & IV	Supplemental		40	Endometrial Cancer Stages I, N=19; II, N=1	Ovarian cancer stages I & II vs Endometrial Cancer Stages I & II	Supplemental
57	Endometrial Cancer Stages I, II, III & IV, N=40	Endometrial Cancer Stages I, II, IIIC & IV vs Benign Gynecology	1C & 1D		57	Endometrial Cancer Stages III & IV, N=20	Endometrial Cancer Stages I & II vs Endometrial Cancer Stages IIIC & IV	2C		81	Abonrmal Endometrial Not-Cancer, N=20	Endometrial Cancer Stages IIIC & IV vs Benign Gynecology	2B		81	Abonrmal Endometrial Not-Cancer, N=20	Endometrial Cancer Stages I & II vs Benign Gynecology	2A		27	Ovarian Cancer Stages I, N=16; II, N=5; III,N=12; IV,N=2	Endometrial Cancer Stages I, II, IIIC & IV vs Ovarian Cancer Stages I, II, III & IV	2D		67	Endometrial Cancer Stages III, N=19; IV, N=1	Ovarian cancer stages III & IV vs Endometrial Cancer Stages III & IV	Supplemental		41	Endometrial Cancer Stages I, N=19; II, N=1	Ovarian cancer stages I & II vs Endometrial Cancer Stages I & II	Supplemental
58	Endometrial Cancer Stages I, II, III & IV, N=40	Endometrial Cancer Stages I, II, IIIC & IV vs Benign Gynecology	1C & 1D		58	Endometrial Cancer Stages III & IV, N=20	Endometrial Cancer Stages I & II vs Endometrial Cancer Stages IIIC & IV	2C		82	Abonrmal Endometrial Not-Cancer, N=20	Endometrial Cancer Stages IIIC & IV vs Benign Gynecology	2B		82	Abonrmal Endometrial Not-Cancer, N=20	Endometrial Cancer Stages I & II vs Benign Gynecology	2A		28	Ovarian Cancer Stages I, N=16; II, N=5; III,N=12; IV,N=2	Endometrial Cancer Stages I, II, IIIC & IV vs Ovarian Cancer Stages I, II, III & IV	2D		68	Endometrial Cancer Stages III, N=19; IV, N=1	Ovarian cancer stages III & IV vs Endometrial Cancer Stages III & IV	Supplemental		42	Endometrial Cancer Stages I, N=19; II, N=1	Ovarian cancer stages I & II vs Endometrial Cancer Stages I & II	Supplemental
59	Endometrial Cancer Stages I, II, III & IV, N=40	Endometrial Cancer Stages I, II, IIIC & IV vs Benign Gynecology	1C & 1D		59	Endometrial Cancer Stages III & IV, N=20	Endometrial Cancer Stages I & II vs Endometrial Cancer Stages IIIC & IV	2C		83	Abonrmal Endometrial Not-Cancer, N=20	Endometrial Cancer Stages IIIC & IV vs Benign Gynecology	2B		83	Abonrmal Endometrial Not-Cancer, N=20	Endometrial Cancer Stages I & II vs Benign Gynecology	2A		29	Ovarian Cancer Stages I, N=16; II, N=5; III,N=12; IV,N=2	Endometrial Cancer Stages I, II, IIIC & IV vs Ovarian Cancer Stages I, II, III & IV	2D		69	Endometrial Cancer Stages III, N=19; IV, N=1	Ovarian cancer stages III & IV vs Endometrial Cancer Stages III & IV	Supplemental		43	Endometrial Cancer Stages I, N=19; II, N=1	Ovarian cancer stages I & II vs Endometrial Cancer Stages I & II	Supplemental
60	Endometrial Cancer Stages I, II, III & IV, N=40	Endometrial Cancer Stages I, II, IIIC & IV vs Benign Gynecology	1C & 1D		60	Endometrial Cancer Stages III & IV, N=20	Endometrial Cancer Stages I & II vs Endometrial Cancer Stages IIIC & IV	2C		84	Abonrmal Endometrial Not-Cancer, N=20	Endometrial Cancer Stages IIIC & IV vs Benign Gynecology	2B		84	Abonrmal Endometrial Not-Cancer, N=20	Endometrial Cancer Stages I & II vs Benign Gynecology	2A		30	Ovarian Cancer Stages I, N=16; II, N=5; III,N=12; IV,N=2	Endometrial Cancer Stages I, II, IIIC & IV vs Ovarian Cancer Stages I, II, III & IV	2D		70	Endometrial Cancer Stages III, N=19; IV, N=1	Ovarian cancer stages III & IV vs Endometrial Cancer Stages III & IV	Supplemental		44	Endometrial Cancer Stages I, N=19; II, N=1	Ovarian cancer stages I & II vs Endometrial Cancer Stages I & II	Supplemental
61	Endometrial Cancer Stages I, II, III & IV, N=40	Endometrial Cancer Stages I, II, IIIC & IV vs Benign Gynecology	1C & 1D		61	Endometrial Cancer Stages III & IV, N=20	Endometrial Cancer Stages I & II vs Endometrial Cancer Stages IIIC & IV	2C		85	Abonrmal Endometrial Not-Cancer, N=20	Endometrial Cancer Stages IIIC & IV vs Benign Gynecology	2B		85	Abonrmal Endometrial Not-Cancer, N=20	Endometrial Cancer Stages I & II vs Benign Gynecology	2A		31	Ovarian Cancer Stages I, N=16; II, N=5; III,N=12; IV,N=2	Endometrial Cancer Stages I, II, IIIC & IV vs Ovarian Cancer Stages I, II, III & IV	2D		71	Endometrial Cancer Stages III, N=19; IV, N=1	Ovarian cancer stages III & IV vs Endometrial Cancer Stages III & IV	Supplemental		45	Endometrial Cancer Stages I, N=19; II, N=1	Ovarian cancer stages I & II vs Endometrial Cancer Stages I & II	Supplemental
62	Endometrial Cancer Stages I, II, III & IV, N=40	Endometrial Cancer Stages I, II, IIIC & IV vs Benign Gynecology	1C & 1D		62	Endometrial Cancer Stages III & IV, N=20	Endometrial Cancer Stages I & II vs Endometrial Cancer Stages IIIC & IV	2C		86	Abonrmal Endometrial Not-Cancer, N=20	Endometrial Cancer Stages IIIC & IV vs Benign Gynecology	2B		86	Abonrmal Endometrial Not-Cancer, N=20	Endometrial Cancer Stages I & II vs Benign Gynecology	2A		32	Ovarian Cancer Stages I, N=16; II, N=5; III,N=12; IV,N=2	Endometrial Cancer Stages I, II, IIIC & IV vs Ovarian Cancer Stages I, II, III & IV	2D		72	Endometrial Cancer Stages III, N=19; IV, N=1	Ovarian cancer stages III & IV vs Endometrial Cancer Stages III & IV	Supplemental		46	Endometrial Cancer Stages I, N=19; II, N=1	Ovarian cancer stages I & II vs Endometrial Cancer Stages I & II	Supplemental
63	Endometrial Cancer Stages I, II, III & IV, N=40	Endometrial Cancer Stages I, II, IIIC & IV vs Benign Gynecology	1C & 1D		63	Endometrial Cancer Stages III & IV, N=20	Endometrial Cancer Stages I & II vs Endometrial Cancer Stages IIIC & IV	2C		87	Abonrmal Endometrial Not-Cancer, N=20	Endometrial Cancer Stages IIIC & IV vs Benign Gynecology	2B		87	Abonrmal Endometrial Not-Cancer, N=20	Endometrial Cancer Stages I & II vs Benign Gynecology	2A		33	Ovarian Cancer Stages I, N=16; II, N=5; III,N=12; IV,N=2	Endometrial Cancer Stages I, II, IIIC & IV vs Ovarian Cancer Stages I, II, III & IV	2D		73	Endometrial Cancer Stages III, N=19; IV, N=1	Ovarian cancer stages III & IV vs Endometrial Cancer Stages III & IV	Supplemental		47	Endometrial Cancer Stages I, N=19; II, N=1	Ovarian cancer stages I & II vs Endometrial Cancer Stages I & II	Supplemental
64	Endometrial Cancer Stages I, II, III & IV, N=40	Endometrial Cancer Stages I, II, IIIC & IV vs Benign Gynecology	1C & 1D		64	Endometrial Cancer Stages III & IV, N=20	Endometrial Cancer Stages I & II vs Endometrial Cancer Stages IIIC & IV	2C		88	Abonrmal Endometrial Not-Cancer, N=20	Endometrial Cancer Stages IIIC & IV vs Benign Gynecology	2B		88	Abonrmal Endometrial Not-Cancer, N=20	Endometrial Cancer Stages I & II vs Benign Gynecology	2A		34	Ovarian Cancer Stages I, N=16; II, N=5; III,N=12; IV,N=2	Endometrial Cancer Stages I, II, IIIC & IV vs Ovarian Cancer Stages I, II, III & IV	2D		74	Endometrial Cancer Stages III, N=19; IV, N=1	Ovarian cancer stages III & IV vs Endometrial Cancer Stages III & IV	Supplemental		48	Endometrial Cancer Stages I, N=19; II, N=1	Ovarian cancer stages I & II vs Endometrial Cancer Stages I & II	Supplemental
65	Endometrial Cancer Stages I, II, III & IV, N=40	Endometrial Cancer Stages I, II, IIIC & IV vs Benign Gynecology	1C & 1D		65	Endometrial Cancer Stages III & IV, N=20	Endometrial Cancer Stages I & II vs Endometrial Cancer Stages IIIC & IV	2C		89	Abonrmal Endometrial Not-Cancer, N=20	Endometrial Cancer Stages IIIC & IV vs Benign Gynecology	2B		89	Abonrmal Endometrial Not-Cancer, N=20	Endometrial Cancer Stages I & II vs Benign Gynecology	2A		35	Endometrial Cancer Stages I, N=19; II, N=1; III, N=19; IV, N=1	Endometrial Cancer Stages I, II, IIIC & IV vs Ovarian Cancer Stages I, II, III & IV	2D		23	RND: Ovarian Cancer Stages III,N=12; IV,N=2	Ovarian cancer stages III & IV vs Endometrial Cancer Stages III & IV	Supplemental		49	Endometrial Cancer Stages I, N=19; II, N=1	Ovarian cancer stages I & II vs Endometrial Cancer Stages I & II	Supplemental
66	Endometrial Cancer Stages I, II, III & IV, N=40	Endometrial Cancer Stages I, II, IIIC & IV vs Benign Gynecology	1C & 1D		66	Endometrial Cancer Stages III & IV, N=20	Endometrial Cancer Stages I & II vs Endometrial Cancer Stages IIIC & IV	2C		90	Abonrmal Endometrial Not-Cancer, N=20	Endometrial Cancer Stages IIIC & IV vs Benign Gynecology	2B		90	Abonrmal Endometrial Not-Cancer, N=20	Endometrial Cancer Stages I & II vs Benign Gynecology	2A		36	Endometrial Cancer Stages I, N=19; II, N=1; III, N=19; IV, N=1	Endometrial Cancer Stages I, II, IIIC & IV vs Ovarian Cancer Stages I, II, III & IV	2D		25	RND: Ovarian Cancer Stages III,N=12; IV,N=2	Ovarian cancer stages III & IV vs Endometrial Cancer Stages III & IV	Supplemental		50	Endometrial Cancer Stages I, N=19; II, N=1	Ovarian cancer stages I & II vs Endometrial Cancer Stages I & II	Supplemental
67	Endometrial Cancer Stages I, II, III & IV, N=40	Endometrial Cancer Stages I, II, IIIC & IV vs Benign Gynecology	1C & 1D		67	Endometrial Cancer Stages III & IV, N=20	Endometrial Cancer Stages I & II vs Endometrial Cancer Stages IIIC & IV	2C		91	Abonrmal Endometrial Not-Cancer, N=20	Endometrial Cancer Stages IIIC & IV vs Benign Gynecology	2B		91	Abonrmal Endometrial Not-Cancer, N=20	Endometrial Cancer Stages I & II vs Benign Gynecology	2A		37	Endometrial Cancer Stages I, N=19; II, N=1; III, N=19; IV, N=1	Endometrial Cancer Stages I, II, IIIC & IV vs Ovarian Cancer Stages I, II, III & IV	2D		27	RND: Ovarian Cancer Stages III,N=12; IV,N=2	Ovarian cancer stages III & IV vs Endometrial Cancer Stages III & IV	Supplemental		51	Endometrial Cancer Stages I, N=19; II, N=1	Ovarian cancer stages I & II vs Endometrial Cancer Stages I & II	Supplemental
70	Endometrial Cancer Stages I, II, III & IV, N=40	Endometrial Cancer Stages I, II, IIIC & IV vs Benign Gynecology	1C & 1D		70	Endometrial Cancer Stages III & IV, N=20	Endometrial Cancer Stages I & II vs Endometrial Cancer Stages IIIC & IV	2C		92	Abonrmal Endometrial Not-Cancer, N=20	Endometrial Cancer Stages IIIC & IV vs Benign Gynecology	2B		92	Abonrmal Endometrial Not-Cancer, N=20	Endometrial Cancer Stages I & II vs Benign Gynecology	2A		38	Endometrial Cancer Stages I, N=19; II, N=1; III, N=19; IV, N=1	Endometrial Cancer Stages I, II, IIIC & IV vs Ovarian Cancer Stages I, II, III & IV	2D		29	RND: Ovarian Cancer Stages III,N=12; IV,N=2	Ovarian cancer stages III & IV vs Endometrial Cancer Stages III & IV	Supplemental		52	Endometrial Cancer Stages I, N=19; II, N=1	Ovarian cancer stages I & II vs Endometrial Cancer Stages I & II	Supplemental
71	Endometrial Cancer Stages I, II, III & IV, N=40	Endometrial Cancer Stages I, II, IIIC & IV vs Benign Gynecology	1C & 1D		71	Endometrial Cancer Stages III & IV, N=20	Endometrial Cancer Stages I & II vs Endometrial Cancer Stages IIIC & IV	2C		93	Abonrmal Endometrial Not-Cancer, N=20	Endometrial Cancer Stages IIIC & IV vs Benign Gynecology	2B		93	Abonrmal Endometrial Not-Cancer, N=20	Endometrial Cancer Stages I & II vs Benign Gynecology	2A		39	Endometrial Cancer Stages I, N=19; II, N=1; III, N=19; IV, N=1	Endometrial Cancer Stages I, II, IIIC & IV vs Ovarian Cancer Stages I, II, III & IV	2D		31	RND: Ovarian Cancer Stages III,N=12; IV,N=2	Ovarian cancer stages III & IV vs Endometrial Cancer Stages III & IV	Supplemental		53	Endometrial Cancer Stages I, N=19; II, N=1	Ovarian cancer stages I & II vs Endometrial Cancer Stages I & II	Supplemental
74	Endometrial Cancer Stages I, II, III & IV, N=40	Endometrial Cancer Stages I, II, IIIC & IV vs Benign Gynecology	1C & 1D		74	Endometrial Cancer Stages III & IV, N=20	Endometrial Cancer Stages I & II vs Endometrial Cancer Stages IIIC & IV	2C		94	Abonrmal Endometrial Not-Cancer, N=20	Endometrial Cancer Stages IIIC & IV vs Benign Gynecology	2B		94	Abonrmal Endometrial Not-Cancer, N=20	Endometrial Cancer Stages I & II vs Benign Gynecology	2A		40	Endometrial Cancer Stages I, N=19; II, N=1; III, N=19; IV, N=1	Endometrial Cancer Stages I, II, IIIC & IV vs Ovarian Cancer Stages I, II, III & IV	2D		33	RND: Ovarian Cancer Stages III,N=12; IV,N=2	Ovarian cancer stages III & IV vs Endometrial Cancer Stages III & IV	Supplemental		54	Endometrial Cancer Stages I, N=19; II, N=1	Ovarian cancer stages I & II vs Endometrial Cancer Stages I & II	Supplemental
75	Control :abnromal endometrium not cancer, N=20	Endometrial Cancer Stages I, II, IIIC & IV vs Benign Gynecology	1C & 1D		35	RND: Endometrial Cancer Stages I & II, N=20	Endometrial Cancer Stages I & II vs Endometrial Cancer Stages IIIC & IV	2C		75	RND: Endometrial Cancer Stages III & IV, N=20	Endometrial Cancer Stages IIIC & IV vs Benign Gynecology	2B		75	RND: Endometrial Cancer Stages I & II, N=20	Endometrial Cancer Stages I & II vs Benign Gynecology	2A		41	Endometrial Cancer Stages I, N=19; II, N=1; III, N=19; IV, N=1	Endometrial Cancer Stages I, II, IIIC & IV vs Ovarian Cancer Stages I, II, III & IV	2D		55	RND: Ovarian Cancer Stages III,N=12; IV,N=2	Ovarian cancer stages III & IV vs Endometrial Cancer Stages III & IV	Supplemental		1	RND: Ovarian Cancer Stages I, N=16; II, N=5	Ovarian cancer stages I & II vs Endometrial Cancer Stages I & II	Supplemental
76	Control :abnromal endometrium not cancer, N=20	Endometrial Cancer Stages I, II, IIIC & IV vs Benign Gynecology	1C & 1D		37	RND: Endometrial Cancer Stages I & II, N=20	Endometrial Cancer Stages I & II vs Endometrial Cancer Stages IIIC & IV	2C		77	RND: Endometrial Cancer Stages III & IV, N=20	Endometrial Cancer Stages IIIC & IV vs Benign Gynecology	2B		35	RND: Endometrial Cancer Stages I & II, N=20	Endometrial Cancer Stages I & II vs Benign Gynecology	2A		42	Endometrial Cancer Stages I, N=19; II, N=1; III, N=19; IV, N=1	Endometrial Cancer Stages I, II, IIIC & IV vs Ovarian Cancer Stages I, II, III & IV	2D		59	RND: Ovarian Cancer Stages III,N=12; IV,N=2	Ovarian cancer stages III & IV vs Endometrial Cancer Stages III & IV	Supplemental		3	RND: Ovarian Cancer Stages I, N=16; II, N=5	Ovarian cancer stages I & II vs Endometrial Cancer Stages I & II	Supplemental
77	Control :abnromal endometrium not cancer, N=20	Endometrial Cancer Stages I, II, IIIC & IV vs Benign Gynecology	1C & 1D		39	RND: Endometrial Cancer Stages I & II, N=20	Endometrial Cancer Stages I & II vs Endometrial Cancer Stages IIIC & IV	2C		79	RND: Endometrial Cancer Stages III & IV, N=20	Endometrial Cancer Stages IIIC & IV vs Benign Gynecology	2B		47	RND: Endometrial Cancer Stages I & II, N=20	Endometrial Cancer Stages I & II vs Benign Gynecology	2A		43	Endometrial Cancer Stages I, N=19; II, N=1; III, N=19; IV, N=1	Endometrial Cancer Stages I, II, IIIC & IV vs Ovarian Cancer Stages I, II, III & IV	2D		61	RND: Ovarian Cancer Stages III,N=12; IV,N=2	Ovarian cancer stages III & IV vs Endometrial Cancer Stages III & IV	Supplemental		5	RND: Ovarian Cancer Stages I, N=16; II, N=5	Ovarian cancer stages I & II vs Endometrial Cancer Stages I & II	Supplemental
78	Control :abnromal endometrium not cancer, N=20	Endometrial Cancer Stages I, II, IIIC & IV vs Benign Gynecology	1C & 1D		41	RND: Endometrial Cancer Stages I & II, N=20	Endometrial Cancer Stages I & II vs Endometrial Cancer Stages IIIC & IV	2C		55	RND: Endometrial Cancer Stages III & IV, N=20	Endometrial Cancer Stages IIIC & IV vs Benign Gynecology	2B		77	RND: Endometrial Cancer Stages I & II, N=20	Endometrial Cancer Stages I & II vs Benign Gynecology	2A		44	Endometrial Cancer Stages I, N=19; II, N=1; III, N=19; IV, N=1	Endometrial Cancer Stages I, II, IIIC & IV vs Ovarian Cancer Stages I, II, III & IV	2D		63	RND: Ovarian Cancer Stages III,N=12; IV,N=2	Ovarian cancer stages III & IV vs Endometrial Cancer Stages III & IV	Supplemental		7	RND: Ovarian Cancer Stages I, N=16; II, N=5	Ovarian cancer stages I & II vs Endometrial Cancer Stages I & II	Supplemental
79	Control :abnromal endometrium not cancer, N=20	Endometrial Cancer Stages I, II, IIIC & IV vs Benign Gynecology	1C & 1D		43	RND: Endometrial Cancer Stages I & II, N=20	Endometrial Cancer Stages I & II vs Endometrial Cancer Stages IIIC & IV	2C		69	RND: Endometrial Cancer Stages III & IV, N=20	Endometrial Cancer Stages IIIC & IV vs Benign Gynecology	2B		79	RND: Endometrial Cancer Stages I & II, N=20	Endometrial Cancer Stages I & II vs Benign Gynecology	2A		45	Endometrial Cancer Stages I, N=19; II, N=1; III, N=19; IV, N=1	Endometrial Cancer Stages I, II, IIIC & IV vs Ovarian Cancer Stages I, II, III & IV	2D		65	RND: Ovarian Cancer Stages III,N=12; IV,N=2	Ovarian cancer stages III & IV vs Endometrial Cancer Stages III & IV	Supplemental		9	RND: Ovarian Cancer Stages I, N=16; II, N=5	Ovarian cancer stages I & II vs Endometrial Cancer Stages I & II	Supplemental
80	Control :abnromal endometrium not cancer, N=20	Endometrial Cancer Stages I, II, IIIC & IV vs Benign Gynecology	1C & 1D		45	RND: Endometrial Cancer Stages I & II, N=20	Endometrial Cancer Stages I & II vs Endometrial Cancer Stages IIIC & IV	2C		81	RND: Endometrial Cancer Stages III & IV, N=20	Endometrial Cancer Stages IIIC & IV vs Benign Gynecology	2B		37	RND: Endometrial Cancer Stages I & II, N=20	Endometrial Cancer Stages I & II vs Benign Gynecology	2A		46	Endometrial Cancer Stages I, N=19; II, N=1; III, N=19; IV, N=1	Endometrial Cancer Stages I, II, IIIC & IV vs Ovarian Cancer Stages I, II, III & IV	2D		67	RND: Ovarian Cancer Stages III,N=12; IV,N=2	Ovarian cancer stages III & IV vs Endometrial Cancer Stages III & IV	Supplemental		11	RND: Ovarian Cancer Stages I, N=16; II, N=5	Ovarian cancer stages I & II vs Endometrial Cancer Stages I & II	Supplemental
81	Control :abnromal endometrium not cancer, N=20	Endometrial Cancer Stages I, II, IIIC & IV vs Benign Gynecology	1C & 1D		47	RND: Endometrial Cancer Stages I & II, N=20	Endometrial Cancer Stages I & II vs Endometrial Cancer Stages IIIC & IV	2C		83	RND: Endometrial Cancer Stages III & IV, N=20	Endometrial Cancer Stages IIIC & IV vs Benign Gynecology	2B		81	RND: Endometrial Cancer Stages I & II, N=20	Endometrial Cancer Stages I & II vs Benign Gynecology	2A		47	Endometrial Cancer Stages I, N=19; II, N=1; III, N=19; IV, N=1	Endometrial Cancer Stages I, II, IIIC & IV vs Ovarian Cancer Stages I, II, III & IV	2D		69	RND: Ovarian Cancer Stages III,N=12; IV,N=2	Ovarian cancer stages III & IV vs Endometrial Cancer Stages III & IV	Supplemental		13	RND: Ovarian Cancer Stages I, N=16; II, N=5	Ovarian cancer stages I & II vs Endometrial Cancer Stages I & II	Supplemental
82	Control :abnromal endometrium not cancer, N=20	Endometrial Cancer Stages I, II, IIIC & IV vs Benign Gynecology	1C & 1D		49	RND: Endometrial Cancer Stages I & II, N=20	Endometrial Cancer Stages I & II vs Endometrial Cancer Stages IIIC & IV	2C		85	RND: Endometrial Cancer Stages III & IV, N=20	Endometrial Cancer Stages IIIC & IV vs Benign Gynecology	2B		39	RND: Endometrial Cancer Stages I & II, N=20	Endometrial Cancer Stages I & II vs Benign Gynecology	2A		48	Endometrial Cancer Stages I, N=19; II, N=1; III, N=19; IV, N=1	Endometrial Cancer Stages I, II, IIIC & IV vs Ovarian Cancer Stages I, II, III & IV	2D		71	RND: Ovarian Cancer Stages III,N=12; IV,N=2	Ovarian cancer stages III & IV vs Endometrial Cancer Stages III & IV	Supplemental		15	RND: Ovarian Cancer Stages I, N=16; II, N=5	Ovarian cancer stages I & II vs Endometrial Cancer Stages I & II	Supplemental
83	Control :abnromal endometrium not cancer, N=20	Endometrial Cancer Stages I, II, IIIC & IV vs Benign Gynecology	1C & 1D		51	RND: Endometrial Cancer Stages I & II, N=20	Endometrial Cancer Stages I & II vs Endometrial Cancer Stages IIIC & IV	2C		57	RND: Endometrial Cancer Stages III & IV, N=20	Endometrial Cancer Stages IIIC & IV vs Benign Gynecology	2B		83	RND: Endometrial Cancer Stages I & II, N=20	Endometrial Cancer Stages I & II vs Benign Gynecology	2A		49	Endometrial Cancer Stages I, N=19; II, N=1; III, N=19; IV, N=1	Endometrial Cancer Stages I, II, IIIC & IV vs Ovarian Cancer Stages I, II, III & IV	2D		57	RND: Endometrial Cancer Stages III, N=19; IV, N=1	Ovarian cancer stages III & IV vs Endometrial Cancer Stages III & IV	Supplemental		18	RND: Ovarian Cancer Stages I, N=16; II, N=5	Ovarian cancer stages I & II vs Endometrial Cancer Stages I & II	Supplemental
84	Control :abnromal endometrium not cancer, N=20	Endometrial Cancer Stages I, II, IIIC & IV vs Benign Gynecology	1C & 1D		53	RND: Endometrial Cancer Stages I & II, N=20	Endometrial Cancer Stages I & II vs Endometrial Cancer Stages IIIC & IV	2C		87	RND: Endometrial Cancer Stages III & IV, N=20	Endometrial Cancer Stages IIIC & IV vs Benign Gynecology	2B		85	RND: Endometrial Cancer Stages I & II, N=20	Endometrial Cancer Stages I & II vs Benign Gynecology	2A		50	Endometrial Cancer Stages I, N=19; II, N=1; III, N=19; IV, N=1	Endometrial Cancer Stages I, II, IIIC & IV vs Ovarian Cancer Stages I, II, III & IV	2D		21	RND: Endometrial Cancer Stages III, N=19; IV, N=1	Ovarian cancer stages III & IV vs Endometrial Cancer Stages III & IV	Supplemental		20	RND: Ovarian Cancer Stages I, N=16; II, N=5	Ovarian cancer stages I & II vs Endometrial Cancer Stages I & II	Supplemental
85	Control :abnromal endometrium not cancer, N=20	Endometrial Cancer Stages I, II, IIIC & IV vs Benign Gynecology	1C & 1D		55	RND: Endometrial Cancer Stages I & II, N=20	Endometrial Cancer Stages I & II vs Endometrial Cancer Stages IIIC & IV	2C		89	RND: Endometrial Cancer Stages III & IV, N=20	Endometrial Cancer Stages IIIC & IV vs Benign Gynecology	2B		41	RND: Endometrial Cancer Stages I & II, N=20	Endometrial Cancer Stages I & II vs Benign Gynecology	2A		51	Endometrial Cancer Stages I, N=19; II, N=1; III, N=19; IV, N=1	Endometrial Cancer Stages I, II, IIIC & IV vs Ovarian Cancer Stages I, II, III & IV	2D		73	RND: Endometrial Cancer Stages III, N=19; IV, N=1	Ovarian cancer stages III & IV vs Endometrial Cancer Stages III & IV	Supplemental		36	RND: Ovarian Cancer Stages I, N=16; II, N=5	Ovarian cancer stages I & II vs Endometrial Cancer Stages I & II	Supplemental
86	Control :abnromal endometrium not cancer, N=20	Endometrial Cancer Stages I, II, IIIC & IV vs Benign Gynecology	1C & 1D		57	RND: Endometrial Cancer Stages I & II, N=20	Endometrial Cancer Stages I & II vs Endometrial Cancer Stages IIIC & IV	2C		59	RND: Endometrial Cancer Stages III & IV, N=20	Endometrial Cancer Stages IIIC & IV vs Benign Gynecology	2B		49	RND: Endometrial Cancer Stages I & II, N=20	Endometrial Cancer Stages I & II vs Benign Gynecology	2A		52	Endometrial Cancer Stages I, N=19; II, N=1; III, N=19; IV, N=1	Endometrial Cancer Stages I, II, IIIC & IV vs Ovarian Cancer Stages I, II, III & IV	2D		22	RND: Endometrial Cancer Stages III, N=19; IV, N=1	Ovarian cancer stages III & IV vs Endometrial Cancer Stages III & IV	Supplemental		38	RND: Ovarian Cancer Stages I, N=16; II, N=5	Ovarian cancer stages I & II vs Endometrial Cancer Stages I & II	Supplemental
87	Control :abnromal endometrium not cancer, N=20	Endometrial Cancer Stages I, II, IIIC & IV vs Benign Gynecology	1C & 1D		59	RND: Endometrial Cancer Stages I & II, N=20	Endometrial Cancer Stages I & II vs Endometrial Cancer Stages IIIC & IV	2C		61	RND: Endometrial Cancer Stages III & IV, N=20	Endometrial Cancer Stages IIIC & IV vs Benign Gynecology	2B		53	RND: Endometrial Cancer Stages I & II, N=20	Endometrial Cancer Stages I & II vs Benign Gynecology	2A		53	Endometrial Cancer Stages I, N=19; II, N=1; III, N=19; IV, N=1	Endometrial Cancer Stages I, II, IIIC & IV vs Ovarian Cancer Stages I, II, III & IV	2D		24	RND: Endometrial Cancer Stages III, N=19; IV, N=1	Ovarian cancer stages III & IV vs Endometrial Cancer Stages III & IV	Supplemental		40	RND: Ovarian Cancer Stages I, N=16; II, N=5	Ovarian cancer stages I & II vs Endometrial Cancer Stages I & II	Supplemental
88	Control :abnromal endometrium not cancer, N=20	Endometrial Cancer Stages I, II, IIIC & IV vs Benign Gynecology	1C & 1D		61	RND: Endometrial Cancer Stages I & II, N=20	Endometrial Cancer Stages I & II vs Endometrial Cancer Stages IIIC & IV	2C		91	RND: Endometrial Cancer Stages III & IV, N=20	Endometrial Cancer Stages IIIC & IV vs Benign Gynecology	2B		43	RND: Endometrial Cancer Stages I & II, N=20	Endometrial Cancer Stages I & II vs Benign Gynecology	2A		54	Endometrial Cancer Stages I, N=19; II, N=1; III, N=19; IV, N=1	Endometrial Cancer Stages I, II, IIIC & IV vs Ovarian Cancer Stages I, II, III & IV	2D		26	RND: Endometrial Cancer Stages III, N=19; IV, N=1	Ovarian cancer stages III & IV vs Endometrial Cancer Stages III & IV	Supplemental		42	RND: Ovarian Cancer Stages I, N=16; II, N=5	Ovarian cancer stages I & II vs Endometrial Cancer Stages I & II	Supplemental
89	Control :abnromal endometrium not cancer, N=20	Endometrial Cancer Stages I, II, IIIC & IV vs Benign Gynecology	1C & 1D		63	RND: Endometrial Cancer Stages I & II, N=20	Endometrial Cancer Stages I & II vs Endometrial Cancer Stages IIIC & IV	2C		93	RND: Endometrial Cancer Stages III & IV, N=20	Endometrial Cancer Stages IIIC & IV vs Benign Gynecology	2B		87	RND: Endometrial Cancer Stages I & II, N=20	Endometrial Cancer Stages I & II vs Benign Gynecology	2A		55	Endometrial Cancer Stages I, N=19; II, N=1; III, N=19; IV, N=1	Endometrial Cancer Stages I, II, IIIC & IV vs Ovarian Cancer Stages I, II, III & IV	2D		28	RND: Endometrial Cancer Stages III, N=19; IV, N=1	Ovarian cancer stages III & IV vs Endometrial Cancer Stages III & IV	Supplemental		44	RND: Ovarian Cancer Stages I, N=16; II, N=5	Ovarian cancer stages I & II vs Endometrial Cancer Stages I & II	Supplemental
90	Control :abnromal endometrium not cancer, N=20	Endometrial Cancer Stages I, II, IIIC & IV vs Benign Gynecology	1C & 1D		65	RND: Endometrial Cancer Stages I & II, N=20	Endometrial Cancer Stages I & II vs Endometrial Cancer Stages IIIC & IV	2C		63	RND: Endometrial Cancer Stages III & IV, N=20	Endometrial Cancer Stages IIIC & IV vs Benign Gynecology	2B		45	RND: Endometrial Cancer Stages I & II, N=20	Endometrial Cancer Stages I & II vs Benign Gynecology	2A		56	Endometrial Cancer Stages I, N=19; II, N=1; III, N=19; IV, N=1	Endometrial Cancer Stages I, II, IIIC & IV vs Ovarian Cancer Stages I, II, III & IV	2D		30	RND: Endometrial Cancer Stages III, N=19; IV, N=1	Ovarian cancer stages III & IV vs Endometrial Cancer Stages III & IV	Supplemental		46	RND: Ovarian Cancer Stages I, N=16; II, N=5	Ovarian cancer stages I & II vs Endometrial Cancer Stages I & II	Supplemental
91	Control :abnromal endometrium not cancer, N=20	Endometrial Cancer Stages I, II, IIIC & IV vs Benign Gynecology	1C & 1D		67	RND: Endometrial Cancer Stages I & II, N=20	Endometrial Cancer Stages I & II vs Endometrial Cancer Stages IIIC & IV	2C		71	RND: Endometrial Cancer Stages III & IV, N=20	Endometrial Cancer Stages IIIC & IV vs Benign Gynecology	2B		89	RND: Endometrial Cancer Stages I & II, N=20	Endometrial Cancer Stages I & II vs Benign Gynecology	2A		57	Endometrial Cancer Stages I, N=19; II, N=1; III, N=19; IV, N=1	Endometrial Cancer Stages I, II, IIIC & IV vs Ovarian Cancer Stages I, II, III & IV	2D		32	RND: Endometrial Cancer Stages III, N=19; IV, N=1	Ovarian cancer stages III & IV vs Endometrial Cancer Stages III & IV	Supplemental		48	RND: Ovarian Cancer Stages I, N=16; II, N=5	Ovarian cancer stages I & II vs Endometrial Cancer Stages I & II	Supplemental
92	Control :abnromal endometrium not cancer, N=20	Endometrial Cancer Stages I, II, IIIC & IV vs Benign Gynecology	1C & 1D		69	RND: Endometrial Cancer Stages I & II, N=20	Endometrial Cancer Stages I & II vs Endometrial Cancer Stages IIIC & IV	2C		65	RND: Endometrial Cancer Stages III & IV, N=20	Endometrial Cancer Stages IIIC & IV vs Benign Gynecology	2B		51	RND: Endometrial Cancer Stages I & II, N=20	Endometrial Cancer Stages I & II vs Benign Gynecology	2A		58	Endometrial Cancer Stages I, N=19; II, N=1; III, N=19; IV, N=1	Endometrial Cancer Stages I, II, IIIC & IV vs Ovarian Cancer Stages I, II, III & IV	2D		34	RND: Endometrial Cancer Stages III, N=19; IV, N=1	Ovarian cancer stages III & IV vs Endometrial Cancer Stages III & IV	Supplemental		50	RND: Ovarian Cancer Stages I, N=16; II, N=5	Ovarian cancer stages I & II vs Endometrial Cancer Stages I & II	Supplemental
93	Control :abnromal endometrium not cancer, N=20	Endometrial Cancer Stages I, II, IIIC & IV vs Benign Gynecology	1C & 1D		72	RND: Endometrial Cancer Stages I & II, N=20	Endometrial Cancer Stages I & II vs Endometrial Cancer Stages IIIC & IV	2C		67	RND: Endometrial Cancer Stages III & IV, N=20	Endometrial Cancer Stages IIIC & IV vs Benign Gynecology	2B		91	RND: Endometrial Cancer Stages I & II, N=20	Endometrial Cancer Stages I & II vs Benign Gynecology	2A		59	Endometrial Cancer Stages I, N=19; II, N=1; III, N=19; IV, N=1	Endometrial Cancer Stages I, II, IIIC & IV vs Ovarian Cancer Stages I, II, III & IV	2D		56	RND: Endometrial Cancer Stages III, N=19; IV, N=1	Ovarian cancer stages III & IV vs Endometrial Cancer Stages III & IV	Supplemental		52	RND: Ovarian Cancer Stages I, N=16; II, N=5	Ovarian cancer stages I & II vs Endometrial Cancer Stages I & II	Supplemental
94	Control :abnromal endometrium not cancer, N=20	Endometrial Cancer Stages I, II, IIIC & IV vs Benign Gynecology	1C & 1D		71	RND: Endometrial Cancer Stages I & II, N=20	Endometrial Cancer Stages I & II vs Endometrial Cancer Stages IIIC & IV	2C		73	RND: Endometrial Cancer Stages III & IV, N=20	Endometrial Cancer Stages IIIC & IV vs Benign Gynecology	2B		93	RND: Endometrial Cancer Stages I & II, N=20	Endometrial Cancer Stages I & II vs Benign Gynecology	2A		60	Endometrial Cancer Stages I, N=19; II, N=1; III, N=19; IV, N=1	Endometrial Cancer Stages I, II, IIIC & IV vs Ovarian Cancer Stages I, II, III & IV	2D		58	RND: Endometrial Cancer Stages III, N=19; IV, N=1	Ovarian cancer stages III & IV vs Endometrial Cancer Stages III & IV	Supplemental		54	RND: Ovarian Cancer Stages I, N=16; II, N=5	Ovarian cancer stages I & II vs Endometrial Cancer Stages I & II	Supplemental
77	RND: Endometrial Cancer Stages I, II, III & IV, N=40	Endometrial Cancer Stages I, II, IIIC & IV vs Benign Gynecology	1C & 1D		36	RND: Endometrial Cancer Stages III & IV, N=20	Endometrial Cancer Stages I & II vs Endometrial Cancer Stages IIIC & IV	2C		74	RND: Abonrmal Endometrial Not-Cancer, N=20	Endometrial Cancer Stages IIIC & IV vs Benign Gynecology	2B		76	RND: Abonrmal Endometrial Not-Cancer, N=20	Endometrial Cancer Stages I & II vs Benign Gynecology	2A		61	Endometrial Cancer Stages I, N=19; II, N=1; III, N=19; IV, N=1	Endometrial Cancer Stages I, II, IIIC & IV vs Ovarian Cancer Stages I, II, III & IV	2D		60	RND: Endometrial Cancer Stages III, N=19; IV, N=1	Ovarian cancer stages III & IV vs Endometrial Cancer Stages III & IV	Supplemental		2	RND: Endometrial Cancer Stages I, N=19; II, N=1	Ovarian cancer stages I & II vs Endometrial Cancer Stages I & II	Supplemental
80	RND: Endometrial Cancer Stages I, II, III & IV, N=40	Endometrial Cancer Stages I, II, IIIC & IV vs Benign Gynecology	1C & 1D		38	RND: Endometrial Cancer Stages III & IV, N=20	Endometrial Cancer Stages I & II vs Endometrial Cancer Stages IIIC & IV	2C		76	RND: Abonrmal Endometrial Not-Cancer, N=20	Endometrial Cancer Stages IIIC & IV vs Benign Gynecology	2B		36	RND: Abonrmal Endometrial Not-Cancer, N=20	Endometrial Cancer Stages I & II vs Benign Gynecology	2A		62	Endometrial Cancer Stages I, N=19; II, N=1; III, N=19; IV, N=1	Endometrial Cancer Stages I, II, IIIC & IV vs Ovarian Cancer Stages I, II, III & IV	2D		62	RND: Endometrial Cancer Stages III, N=19; IV, N=1	Ovarian cancer stages III & IV vs Endometrial Cancer Stages III & IV	Supplemental		4	RND: Endometrial Cancer Stages I, N=19; II, N=1	Ovarian cancer stages I & II vs Endometrial Cancer Stages I & II	Supplemental
83	RND: Endometrial Cancer Stages I, II, III & IV, N=40	Endometrial Cancer Stages I, II, IIIC & IV vs Benign Gynecology	1C & 1D		40	RND: Endometrial Cancer Stages III & IV, N=20	Endometrial Cancer Stages I & II vs Endometrial Cancer Stages IIIC & IV	2C		78	RND: Abonrmal Endometrial Not-Cancer, N=20	Endometrial Cancer Stages IIIC & IV vs Benign Gynecology	2B		54	RND: Abonrmal Endometrial Not-Cancer, N=20	Endometrial Cancer Stages I & II vs Benign Gynecology	2A		63	Endometrial Cancer Stages I, N=19; II, N=1; III, N=19; IV, N=1	Endometrial Cancer Stages I, II, IIIC & IV vs Ovarian Cancer Stages I, II, III & IV	2D		64	RND: Endometrial Cancer Stages III, N=19; IV, N=1	Ovarian cancer stages III & IV vs Endometrial Cancer Stages III & IV	Supplemental		6	RND: Endometrial Cancer Stages I, N=19; II, N=1	Ovarian cancer stages I & II vs Endometrial Cancer Stages I & II	Supplemental
86	RND: Endometrial Cancer Stages I, II, III & IV, N=40	Endometrial Cancer Stages I, II, IIIC & IV vs Benign Gynecology	1C & 1D		42	RND: Endometrial Cancer Stages III & IV, N=20	Endometrial Cancer Stages I & II vs Endometrial Cancer Stages IIIC & IV	2C		80	RND: Abonrmal Endometrial Not-Cancer, N=20	Endometrial Cancer Stages IIIC & IV vs Benign Gynecology	2B		78	RND: Abonrmal Endometrial Not-Cancer, N=20	Endometrial Cancer Stages I & II vs Benign Gynecology	2A		64	Endometrial Cancer Stages I, N=19; II, N=1; III, N=19; IV, N=1	Endometrial Cancer Stages I, II, IIIC & IV vs Ovarian Cancer Stages I, II, III & IV	2D		66	RND: Endometrial Cancer Stages III, N=19; IV, N=1	Ovarian cancer stages III & IV vs Endometrial Cancer Stages III & IV	Supplemental		8	RND: Endometrial Cancer Stages I, N=19; II, N=1	Ovarian cancer stages I & II vs Endometrial Cancer Stages I & II	Supplemental
89	RND: Endometrial Cancer Stages I, II, III & IV, N=40	Endometrial Cancer Stages I, II, IIIC & IV vs Benign Gynecology	1C & 1D		44	RND: Endometrial Cancer Stages III & IV, N=20	Endometrial Cancer Stages I & II vs Endometrial Cancer Stages IIIC & IV	2C		70	RND: Abonrmal Endometrial Not-Cancer, N=20	Endometrial Cancer Stages IIIC & IV vs Benign Gynecology	2B		80	RND: Abonrmal Endometrial Not-Cancer, N=20	Endometrial Cancer Stages I & II vs Benign Gynecology	2A		65	Endometrial Cancer Stages I, N=19; II, N=1; III, N=19; IV, N=1	Endometrial Cancer Stages I, II, IIIC & IV vs Ovarian Cancer Stages I, II, III & IV	2D		68	RND: Endometrial Cancer Stages III, N=19; IV, N=1	Ovarian cancer stages III & IV vs Endometrial Cancer Stages III & IV	Supplemental		10	RND: Endometrial Cancer Stages I, N=19; II, N=1	Ovarian cancer stages I & II vs Endometrial Cancer Stages I & II	Supplemental
92	RND: Endometrial Cancer Stages I, II, III & IV, N=40	Endometrial Cancer Stages I, II, IIIC & IV vs Benign Gynecology	1C & 1D		46	RND: Endometrial Cancer Stages III & IV, N=20	Endometrial Cancer Stages I & II vs Endometrial Cancer Stages IIIC & IV	2C		68	RND: Abonrmal Endometrial Not-Cancer, N=20	Endometrial Cancer Stages IIIC & IV vs Benign Gynecology	2B		48	RND: Abonrmal Endometrial Not-Cancer, N=20	Endometrial Cancer Stages I & II vs Benign Gynecology	2A		66	Endometrial Cancer Stages I, N=19; II, N=1; III, N=19; IV, N=1	Endometrial Cancer Stages I, II, IIIC & IV vs Ovarian Cancer Stages I, II, III & IV	2D		70	RND: Endometrial Cancer Stages III, N=19; IV, N=1	Ovarian cancer stages III & IV vs Endometrial Cancer Stages III & IV	Supplemental		12	RND: Endometrial Cancer Stages I, N=19; II, N=1	Ovarian cancer stages I & II vs Endometrial Cancer Stages I & II	Supplemental
35	RND: Endometrial Cancer Stages I, II, III & IV, N=40	Endometrial Cancer Stages I, II, IIIC & IV vs Benign Gynecology	1C & 1D		48	RND: Endometrial Cancer Stages III & IV, N=20	Endometrial Cancer Stages I & II vs Endometrial Cancer Stages IIIC & IV	2C		82	RND: Abonrmal Endometrial Not-Cancer, N=20	Endometrial Cancer Stages IIIC & IV vs Benign Gynecology	2B		82	RND: Abonrmal Endometrial Not-Cancer, N=20	Endometrial Cancer Stages I & II vs Benign Gynecology	2A		67	Endometrial Cancer Stages I, N=19; II, N=1; III, N=19; IV, N=1	Endometrial Cancer Stages I, II, IIIC & IV vs Ovarian Cancer Stages I, II, III & IV	2D		72	RND: Endometrial Cancer Stages III, N=19; IV, N=1	Ovarian cancer stages III & IV vs Endometrial Cancer Stages III & IV	Supplemental		14	RND: Endometrial Cancer Stages I, N=19; II, N=1	Ovarian cancer stages I & II vs Endometrial Cancer Stages I & II	Supplemental
38	RND: Endometrial Cancer Stages I, II, III & IV, N=40	Endometrial Cancer Stages I, II, IIIC & IV vs Benign Gynecology	1C & 1D		50	RND: Endometrial Cancer Stages III & IV, N=20	Endometrial Cancer Stages I & II vs Endometrial Cancer Stages IIIC & IV	2C		84	RND: Abonrmal Endometrial Not-Cancer, N=20	Endometrial Cancer Stages IIIC & IV vs Benign Gynecology	2B		38	RND: Abonrmal Endometrial Not-Cancer, N=20	Endometrial Cancer Stages I & II vs Benign Gynecology	2A		68	Endometrial Cancer Stages I, N=19; II, N=1; III, N=19; IV, N=1	Endometrial Cancer Stages I, II, IIIC & IV vs Ovarian Cancer Stages I, II, III & IV	2D		74	RND: Endometrial Cancer Stages III, N=19; IV, N=1	Ovarian cancer stages III & IV vs Endometrial Cancer Stages III & IV	Supplemental		16	RND: Endometrial Cancer Stages I, N=19; II, N=1	Ovarian cancer stages I & II vs Endometrial Cancer Stages I & II	Supplemental
41	RND: Endometrial Cancer Stages I, II, III & IV, N=40	Endometrial Cancer Stages I, II, IIIC & IV vs Benign Gynecology	1C & 1D		52	RND: Endometrial Cancer Stages III & IV, N=20	Endometrial Cancer Stages I & II vs Endometrial Cancer Stages IIIC & IV	2C		56	RND: Abonrmal Endometrial Not-Cancer, N=20	Endometrial Cancer Stages IIIC & IV vs Benign Gynecology	2B		84	RND: Abonrmal Endometrial Not-Cancer, N=20	Endometrial Cancer Stages I & II vs Benign Gynecology	2A		69	Endometrial Cancer Stages I, N=19; II, N=1; III, N=19; IV, N=1	Endometrial Cancer Stages I, II, IIIC & IV vs Ovarian Cancer Stages I, II, III & IV	2D							17	RND: Endometrial Cancer Stages I, N=19; II, N=1	Ovarian cancer stages I & II vs Endometrial Cancer Stages I & II	Supplemental
44	RND: Endometrial Cancer Stages I, II, III & IV, N=40	Endometrial Cancer Stages I, II, IIIC & IV vs Benign Gynecology	1C & 1D		54	RND: Endometrial Cancer Stages III & IV, N=20	Endometrial Cancer Stages I & II vs Endometrial Cancer Stages IIIC & IV	2C		58	RND: Abonrmal Endometrial Not-Cancer, N=20	Endometrial Cancer Stages IIIC & IV vs Benign Gynecology	2B		40	RND: Abonrmal Endometrial Not-Cancer, N=20	Endometrial Cancer Stages I & II vs Benign Gynecology	2A		70	Endometrial Cancer Stages I, N=19; II, N=1; III, N=19; IV, N=1	Endometrial Cancer Stages I, II, IIIC & IV vs Ovarian Cancer Stages I, II, III & IV	2D							19	RND: Endometrial Cancer Stages I, N=19; II, N=1	Ovarian cancer stages I & II vs Endometrial Cancer Stages I & II	Supplemental
47	RND: Endometrial Cancer Stages I, II, III & IV, N=40	Endometrial Cancer Stages I, II, IIIC & IV vs Benign Gynecology	1C & 1D		56	RND: Endometrial Cancer Stages III & IV, N=20	Endometrial Cancer Stages I & II vs Endometrial Cancer Stages IIIC & IV	2C		86	RND: Abonrmal Endometrial Not-Cancer, N=20	Endometrial Cancer Stages IIIC & IV vs Benign Gynecology	2B		42	RND: Abonrmal Endometrial Not-Cancer, N=20	Endometrial Cancer Stages I & II vs Benign Gynecology	2A		71	Endometrial Cancer Stages I, N=19; II, N=1; III, N=19; IV, N=1	Endometrial Cancer Stages I, II, IIIC & IV vs Ovarian Cancer Stages I, II, III & IV	2D							35	RND: Endometrial Cancer Stages I, N=19; II, N=1	Ovarian cancer stages I & II vs Endometrial Cancer Stages I & II	Supplemental
50	RND: Endometrial Cancer Stages I, II, III & IV, N=40	Endometrial Cancer Stages I, II, IIIC & IV vs Benign Gynecology	1C & 1D		58	RND: Endometrial Cancer Stages III & IV, N=20	Endometrial Cancer Stages I & II vs Endometrial Cancer Stages IIIC & IV	2C		88	RND: Abonrmal Endometrial Not-Cancer, N=20	Endometrial Cancer Stages IIIC & IV vs Benign Gynecology	2B		44	RND: Abonrmal Endometrial Not-Cancer, N=20	Endometrial Cancer Stages I & II vs Benign Gynecology	2A		72	Endometrial Cancer Stages I, N=19; II, N=1; III, N=19; IV, N=1	Endometrial Cancer Stages I, II, IIIC & IV vs Ovarian Cancer Stages I, II, III & IV	2D							37	RND: Endometrial Cancer Stages I, N=19; II, N=1	Ovarian cancer stages I & II vs Endometrial Cancer Stages I & II	Supplemental
53	RND: Endometrial Cancer Stages I, II, III & IV, N=40	Endometrial Cancer Stages I, II, IIIC & IV vs Benign Gynecology	1C & 1D		60	RND: Endometrial Cancer Stages III & IV, N=20	Endometrial Cancer Stages I & II vs Endometrial Cancer Stages IIIC & IV	2C		90	RND: Abonrmal Endometrial Not-Cancer, N=20	Endometrial Cancer Stages IIIC & IV vs Benign Gynecology	2B		86	RND: Abonrmal Endometrial Not-Cancer, N=20	Endometrial Cancer Stages I & II vs Benign Gynecology	2A		73	Endometrial Cancer Stages I, N=19; II, N=1; III, N=19; IV, N=1	Endometrial Cancer Stages I, II, IIIC & IV vs Ovarian Cancer Stages I, II, III & IV	2D							39	RND: Endometrial Cancer Stages I, N=19; II, N=1	Ovarian cancer stages I & II vs Endometrial Cancer Stages I & II	Supplemental
55	RND: Endometrial Cancer Stages I, II, III & IV, N=40	Endometrial Cancer Stages I, II, IIIC & IV vs Benign Gynecology	1C & 1D		62	RND: Endometrial Cancer Stages III & IV, N=20	Endometrial Cancer Stages I & II vs Endometrial Cancer Stages IIIC & IV	2C		60	RND: Abonrmal Endometrial Not-Cancer, N=20	Endometrial Cancer Stages IIIC & IV vs Benign Gynecology	2B		88	RND: Abonrmal Endometrial Not-Cancer, N=20	Endometrial Cancer Stages I & II vs Benign Gynecology	2A		74	Endometrial Cancer Stages I, N=19; II, N=1; III, N=19; IV, N=1	Endometrial Cancer Stages I, II, IIIC & IV vs Ovarian Cancer Stages I, II, III & IV	2D							41	RND: Endometrial Cancer Stages I, N=19; II, N=1	Ovarian cancer stages I & II vs Endometrial Cancer Stages I & II	Supplemental
58	RND: Endometrial Cancer Stages I, II, III & IV, N=40	Endometrial Cancer Stages I, II, IIIC & IV vs Benign Gynecology	1C & 1D		64	RND: Endometrial Cancer Stages III & IV, N=20	Endometrial Cancer Stages I & II vs Endometrial Cancer Stages IIIC & IV	2C		92	RND: Abonrmal Endometrial Not-Cancer, N=20	Endometrial Cancer Stages IIIC & IV vs Benign Gynecology	2B		50	RND: Abonrmal Endometrial Not-Cancer, N=20	Endometrial Cancer Stages I & II vs Benign Gynecology	2A		35	RND: Ovarian Cancer Stages I, N=16; II, N=5; III,N=12; IV,N=2	Endometrial Cancer Stages I, II, IIIC & IV vs Ovarian Cancer Stages I, II, III & IV	2D							43	RND: Endometrial Cancer Stages I, N=19; II, N=1	Ovarian cancer stages I & II vs Endometrial Cancer Stages I & II	Supplemental
61	RND: Endometrial Cancer Stages I, II, III & IV, N=40	Endometrial Cancer Stages I, II, IIIC & IV vs Benign Gynecology	1C & 1D		66	RND: Endometrial Cancer Stages III & IV, N=20	Endometrial Cancer Stages I & II vs Endometrial Cancer Stages IIIC & IV	2C		94	RND: Abonrmal Endometrial Not-Cancer, N=20	Endometrial Cancer Stages IIIC & IV vs Benign Gynecology	2B		90	RND: Abonrmal Endometrial Not-Cancer, N=20	Endometrial Cancer Stages I & II vs Benign Gynecology	2A		47	RND: Ovarian Cancer Stages I, N=16; II, N=5; III,N=12; IV,N=2	Endometrial Cancer Stages I, II, IIIC & IV vs Ovarian Cancer Stages I, II, III & IV	2D							45	RND: Endometrial Cancer Stages I, N=19; II, N=1	Ovarian cancer stages I & II vs Endometrial Cancer Stages I & II	Supplemental
64	RND: Endometrial Cancer Stages I, II, III & IV, N=40	Endometrial Cancer Stages I, II, IIIC & IV vs Benign Gynecology	1C & 1D		68	RND: Endometrial Cancer Stages III & IV, N=20	Endometrial Cancer Stages I & II vs Endometrial Cancer Stages IIIC & IV	2C		62	RND: Abonrmal Endometrial Not-Cancer, N=20	Endometrial Cancer Stages IIIC & IV vs Benign Gynecology	2B		46	RND: Abonrmal Endometrial Not-Cancer, N=20	Endometrial Cancer Stages I & II vs Benign Gynecology	2A		55	RND: Ovarian Cancer Stages I, N=16; II, N=5; III,N=12; IV,N=2	Endometrial Cancer Stages I, II, IIIC & IV vs Ovarian Cancer Stages I, II, III & IV	2D							47	RND: Endometrial Cancer Stages I, N=19; II, N=1	Ovarian cancer stages I & II vs Endometrial Cancer Stages I & II	Supplemental
67	RND: Endometrial Cancer Stages I, II, III & IV, N=40	Endometrial Cancer Stages I, II, IIIC & IV vs Benign Gynecology	1C & 1D		73	RND: Endometrial Cancer Stages III & IV, N=20	Endometrial Cancer Stages I & II vs Endometrial Cancer Stages IIIC & IV	2C		64	RND: Abonrmal Endometrial Not-Cancer, N=20	Endometrial Cancer Stages IIIC & IV vs Benign Gynecology	2B		52	RND: Abonrmal Endometrial Not-Cancer, N=20	Endometrial Cancer Stages I & II vs Benign Gynecology	2A		69	RND: Ovarian Cancer Stages I, N=16; II, N=5; III,N=12; IV,N=2	Endometrial Cancer Stages I, II, IIIC & IV vs Ovarian Cancer Stages I, II, III & IV	2D							49	RND: Endometrial Cancer Stages I, N=19; II, N=1	Ovarian cancer stages I & II vs Endometrial Cancer Stages I & II	Supplemental
68	RND: Endometrial Cancer Stages I, II, III & IV, N=40	Endometrial Cancer Stages I, II, IIIC & IV vs Benign Gynecology	1C & 1D		70	RND: Endometrial Cancer Stages III & IV, N=20	Endometrial Cancer Stages I & II vs Endometrial Cancer Stages IIIC & IV	2C		66	RND: Abonrmal Endometrial Not-Cancer, N=20	Endometrial Cancer Stages IIIC & IV vs Benign Gynecology	2B		92	RND: Abonrmal Endometrial Not-Cancer, N=20	Endometrial Cancer Stages I & II vs Benign Gynecology	2A		37	RND: Ovarian Cancer Stages I, N=16; II, N=5; III,N=12; IV,N=2	Endometrial Cancer Stages I, II, IIIC & IV vs Ovarian Cancer Stages I, II, III & IV	2D							51	RND: Endometrial Cancer Stages I, N=19; II, N=1	Ovarian cancer stages I & II vs Endometrial Cancer Stages I & II	Supplemental
74	RND: Endometrial Cancer Stages I, II, III & IV, N=40	Endometrial Cancer Stages I, II, IIIC & IV vs Benign Gynecology	1C & 1D		74	RND: Endometrial Cancer Stages III & IV, N=20	Endometrial Cancer Stages I & II vs Endometrial Cancer Stages IIIC & IV	2C		72	RND: Abonrmal Endometrial Not-Cancer, N=20	Endometrial Cancer Stages IIIC & IV vs Benign Gynecology	2B		94	RND: Abonrmal Endometrial Not-Cancer, N=20	Endometrial Cancer Stages I & II vs Benign Gynecology	2A		39	RND: Ovarian Cancer Stages I, N=16; II, N=5; III,N=12; IV,N=2	Endometrial Cancer Stages I, II, IIIC & IV vs Ovarian Cancer Stages I, II, III & IV	2D							53	RND: Endometrial Cancer Stages I, N=19; II, N=1	Ovarian cancer stages I & II vs Endometrial Cancer Stages I & II	Supplemental
75	RND: Endometrial Cancer Stages I, II, III & IV, N=40	Endometrial Cancer Stages I, II, IIIC & IV vs Benign Gynecology	1C & 1D																	57	RND: Ovarian Cancer Stages I, N=16; II, N=5; III,N=12; IV,N=2	Endometrial Cancer Stages I, II, IIIC & IV vs Ovarian Cancer Stages I, II, III & IV	2D
78	RND: Endometrial Cancer Stages I, II, III & IV, N=40	Endometrial Cancer Stages I, II, IIIC & IV vs Benign Gynecology	1C & 1D																	41	RND: Ovarian Cancer Stages I, N=16; II, N=5; III,N=12; IV,N=2	Endometrial Cancer Stages I, II, IIIC & IV vs Ovarian Cancer Stages I, II, III & IV	2D
81	RND: Endometrial Cancer Stages I, II, III & IV, N=40	Endometrial Cancer Stages I, II, IIIC & IV vs Benign Gynecology	1C & 1D																	49	RND: Ovarian Cancer Stages I, N=16; II, N=5; III,N=12; IV,N=2	Endometrial Cancer Stages I, II, IIIC & IV vs Ovarian Cancer Stages I, II, III & IV	2D
84	RND: Endometrial Cancer Stages I, II, III & IV, N=40	Endometrial Cancer Stages I, II, IIIC & IV vs Benign Gynecology	1C & 1D																	43	RND: Ovarian Cancer Stages I, N=16; II, N=5; III,N=12; IV,N=2	Endometrial Cancer Stages I, II, IIIC & IV vs Ovarian Cancer Stages I, II, III & IV	2D
87	RND: Endometrial Cancer Stages I, II, III & IV, N=40	Endometrial Cancer Stages I, II, IIIC & IV vs Benign Gynecology	1C & 1D																	45	RND: Ovarian Cancer Stages I, N=16; II, N=5; III,N=12; IV,N=2	Endometrial Cancer Stages I, II, IIIC & IV vs Ovarian Cancer Stages I, II, III & IV	2D
90	RND: Endometrial Cancer Stages I, II, III & IV, N=40	Endometrial Cancer Stages I, II, IIIC & IV vs Benign Gynecology	1C & 1D																	59	RND: Ovarian Cancer Stages I, N=16; II, N=5; III,N=12; IV,N=2	Endometrial Cancer Stages I, II, IIIC & IV vs Ovarian Cancer Stages I, II, III & IV	2D
93	RND: Endometrial Cancer Stages I, II, III & IV, N=40	Endometrial Cancer Stages I, II, IIIC & IV vs Benign Gynecology	1C & 1D																	51	RND: Ovarian Cancer Stages I, N=16; II, N=5; III,N=12; IV,N=2	Endometrial Cancer Stages I, II, IIIC & IV vs Ovarian Cancer Stages I, II, III & IV	2D
36	RND: Endometrial Cancer Stages I, II, III & IV, N=40	Endometrial Cancer Stages I, II, IIIC & IV vs Benign Gynecology	1C & 1D																	61	RND: Ovarian Cancer Stages I, N=16; II, N=5; III,N=12; IV,N=2	Endometrial Cancer Stages I, II, IIIC & IV vs Ovarian Cancer Stages I, II, III & IV	2D
39	RND: Endometrial Cancer Stages I, II, III & IV, N=40	Endometrial Cancer Stages I, II, IIIC & IV vs Benign Gynecology	1C & 1D																	63	RND: Ovarian Cancer Stages I, N=16; II, N=5; III,N=12; IV,N=2	Endometrial Cancer Stages I, II, IIIC & IV vs Ovarian Cancer Stages I, II, III & IV	2D
42	RND: Endometrial Cancer Stages I, II, III & IV, N=40	Endometrial Cancer Stages I, II, IIIC & IV vs Benign Gynecology	1C & 1D																	65	RND: Ovarian Cancer Stages I, N=16; II, N=5; III,N=12; IV,N=2	Endometrial Cancer Stages I, II, IIIC & IV vs Ovarian Cancer Stages I, II, III & IV	2D
45	RND: Endometrial Cancer Stages I, II, III & IV, N=40	Endometrial Cancer Stages I, II, IIIC & IV vs Benign Gynecology	1C & 1D																	67	RND: Ovarian Cancer Stages I, N=16; II, N=5; III,N=12; IV,N=2	Endometrial Cancer Stages I, II, IIIC & IV vs Ovarian Cancer Stages I, II, III & IV	2D
48	RND: Endometrial Cancer Stages I, II, III & IV, N=40	Endometrial Cancer Stages I, II, IIIC & IV vs Benign Gynecology	1C & 1D																	73	RND: Ovarian Cancer Stages I, N=16; II, N=5; III,N=12; IV,N=2	Endometrial Cancer Stages I, II, IIIC & IV vs Ovarian Cancer Stages I, II, III & IV	2D
51	RND: Endometrial Cancer Stages I, II, III & IV, N=40	Endometrial Cancer Stages I, II, IIIC & IV vs Benign Gynecology	1C & 1D																	21	RND: Ovarian Cancer Stages I, N=16; II, N=5; III,N=12; IV,N=2	Endometrial Cancer Stages I, II, IIIC & IV vs Ovarian Cancer Stages I, II, III & IV	2D
54	RND: Endometrial Cancer Stages I, II, III & IV, N=40	Endometrial Cancer Stages I, II, IIIC & IV vs Benign Gynecology	1C & 1D																	6	RND: Ovarian Cancer Stages I, N=16; II, N=5; III,N=12; IV,N=2	Endometrial Cancer Stages I, II, IIIC & IV vs Ovarian Cancer Stages I, II, III & IV	2D
56	RND: Endometrial Cancer Stages I, II, III & IV, N=40	Endometrial Cancer Stages I, II, IIIC & IV vs Benign Gynecology	1C & 1D																	33	RND: Ovarian Cancer Stages I, N=16; II, N=5; III,N=12; IV,N=2	Endometrial Cancer Stages I, II, IIIC & IV vs Ovarian Cancer Stages I, II, III & IV	2D
59	RND: Endometrial Cancer Stages I, II, III & IV, N=40	Endometrial Cancer Stages I, II, IIIC & IV vs Benign Gynecology	1C & 1D																	14	RND: Ovarian Cancer Stages I, N=16; II, N=5; III,N=12; IV,N=2	Endometrial Cancer Stages I, II, IIIC & IV vs Ovarian Cancer Stages I, II, III & IV	2D
62	RND: Endometrial Cancer Stages I, II, III & IV, N=40	Endometrial Cancer Stages I, II, IIIC & IV vs Benign Gynecology	1C & 1D																	19	RND: Ovarian Cancer Stages I, N=16; II, N=5; III,N=12; IV,N=2	Endometrial Cancer Stages I, II, IIIC & IV vs Ovarian Cancer Stages I, II, III & IV	2D
65	RND: Endometrial Cancer Stages I, II, III & IV, N=40	Endometrial Cancer Stages I, II, IIIC & IV vs Benign Gynecology	1C & 1D																	23	RND: Ovarian Cancer Stages I, N=16; II, N=5; III,N=12; IV,N=2	Endometrial Cancer Stages I, II, IIIC & IV vs Ovarian Cancer Stages I, II, III & IV	2D
72	RND: Endometrial Cancer Stages I, II, III & IV, N=40	Endometrial Cancer Stages I, II, IIIC & IV vs Benign Gynecology	1C & 1D																	8	RND: Ovarian Cancer Stages I, N=16; II, N=5; III,N=12; IV,N=2	Endometrial Cancer Stages I, II, IIIC & IV vs Ovarian Cancer Stages I, II, III & IV	2D
70	RND: Endometrial Cancer Stages I, II, III & IV, N=40	Endometrial Cancer Stages I, II, IIIC & IV vs Benign Gynecology	1C & 1D																	25	RND: Ovarian Cancer Stages I, N=16; II, N=5; III,N=12; IV,N=2	Endometrial Cancer Stages I, II, IIIC & IV vs Ovarian Cancer Stages I, II, III & IV	2D
76	RND: Control :abnromal endometrium not cancer, N=20	Endometrial Cancer Stages I, II, IIIC & IV vs Benign Gynecology	1C & 1D																	2	RND: Ovarian Cancer Stages I, N=16; II, N=5; III,N=12; IV,N=2	Endometrial Cancer Stages I, II, IIIC & IV vs Ovarian Cancer Stages I, II, III & IV	2D
79	RND: Control :abnromal endometrium not cancer, N=20	Endometrial Cancer Stages I, II, IIIC & IV vs Benign Gynecology	1C & 1D																	16	RND: Ovarian Cancer Stages I, N=16; II, N=5; III,N=12; IV,N=2	Endometrial Cancer Stages I, II, IIIC & IV vs Ovarian Cancer Stages I, II, III & IV	2D
82	RND: Control :abnromal endometrium not cancer, N=20	Endometrial Cancer Stages I, II, IIIC & IV vs Benign Gynecology	1C & 1D																	10	RND: Ovarian Cancer Stages I, N=16; II, N=5; III,N=12; IV,N=2	Endometrial Cancer Stages I, II, IIIC & IV vs Ovarian Cancer Stages I, II, III & IV	2D
85	RND: Control :abnromal endometrium not cancer, N=20	Endometrial Cancer Stages I, II, IIIC & IV vs Benign Gynecology	1C & 1D																	4	RND: Ovarian Cancer Stages I, N=16; II, N=5; III,N=12; IV,N=2	Endometrial Cancer Stages I, II, IIIC & IV vs Ovarian Cancer Stages I, II, III & IV	2D
88	RND: Control :abnromal endometrium not cancer, N=20	Endometrial Cancer Stages I, II, IIIC & IV vs Benign Gynecology	1C & 1D																	27	RND: Ovarian Cancer Stages I, N=16; II, N=5; III,N=12; IV,N=2	Endometrial Cancer Stages I, II, IIIC & IV vs Ovarian Cancer Stages I, II, III & IV	2D
91	RND: Control :abnromal endometrium not cancer, N=20	Endometrial Cancer Stages I, II, IIIC & IV vs Benign Gynecology	1C & 1D																	29	RND: Ovarian Cancer Stages I, N=16; II, N=5; III,N=12; IV,N=2	Endometrial Cancer Stages I, II, IIIC & IV vs Ovarian Cancer Stages I, II, III & IV	2D
94	RND: Control :abnromal endometrium not cancer, N=20	Endometrial Cancer Stages I, II, IIIC & IV vs Benign Gynecology	1C & 1D																	12	RND: Ovarian Cancer Stages I, N=16; II, N=5; III,N=12; IV,N=2	Endometrial Cancer Stages I, II, IIIC & IV vs Ovarian Cancer Stages I, II, III & IV	2D
37	RND: Control :abnromal endometrium not cancer, N=20	Endometrial Cancer Stages I, II, IIIC & IV vs Benign Gynecology	1C & 1D																	31	RND: Ovarian Cancer Stages I, N=16; II, N=5; III,N=12; IV,N=2	Endometrial Cancer Stages I, II, IIIC & IV vs Ovarian Cancer Stages I, II, III & IV	2D
40	RND: Control :abnromal endometrium not cancer, N=20	Endometrial Cancer Stages I, II, IIIC & IV vs Benign Gynecology	1C & 1D																	17	RND: Ovarian Cancer Stages I, N=16; II, N=5; III,N=12; IV,N=2	Endometrial Cancer Stages I, II, IIIC & IV vs Ovarian Cancer Stages I, II, III & IV	2D
43	RND: Control :abnromal endometrium not cancer, N=20	Endometrial Cancer Stages I, II, IIIC & IV vs Benign Gynecology	1C & 1D																	74	RND: Endometrial Cancer Stages I, N=19; II, N=1; III, N=19; IV, N=1	Endometrial Cancer Stages I, II, IIIC & IV vs Ovarian Cancer Stages I, II, III & IV	2D
46	RND: Control :abnromal endometrium not cancer, N=20	Endometrial Cancer Stages I, II, IIIC & IV vs Benign Gynecology	1C & 1D																	36	RND: Endometrial Cancer Stages I, N=19; II, N=1; III, N=19; IV, N=1	Endometrial Cancer Stages I, II, IIIC & IV vs Ovarian Cancer Stages I, II, III & IV	2D
49	RND: Control :abnromal endometrium not cancer, N=20	Endometrial Cancer Stages I, II, IIIC & IV vs Benign Gynecology	1C & 1D																	54	RND: Endometrial Cancer Stages I, N=19; II, N=1; III, N=19; IV, N=1	Endometrial Cancer Stages I, II, IIIC & IV vs Ovarian Cancer Stages I, II, III & IV	2D
52	RND: Control :abnromal endometrium not cancer, N=20	Endometrial Cancer Stages I, II, IIIC & IV vs Benign Gynecology	1C & 1D																	70	RND: Endometrial Cancer Stages I, N=19; II, N=1; III, N=19; IV, N=1	Endometrial Cancer Stages I, II, IIIC & IV vs Ovarian Cancer Stages I, II, III & IV	2D
57	RND: Control :abnromal endometrium not cancer, N=20	Endometrial Cancer Stages I, II, IIIC & IV vs Benign Gynecology	1C & 1D																	68	RND: Endometrial Cancer Stages I, N=19; II, N=1; III, N=19; IV, N=1	Endometrial Cancer Stages I, II, IIIC & IV vs Ovarian Cancer Stages I, II, III & IV	2D
60	RND: Control :abnromal endometrium not cancer, N=20	Endometrial Cancer Stages I, II, IIIC & IV vs Benign Gynecology	1C & 1D																	48	RND: Endometrial Cancer Stages I, N=19; II, N=1; III, N=19; IV, N=1	Endometrial Cancer Stages I, II, IIIC & IV vs Ovarian Cancer Stages I, II, III & IV	2D
63	RND: Control :abnromal endometrium not cancer, N=20	Endometrial Cancer Stages I, II, IIIC & IV vs Benign Gynecology	1C & 1D																	38	RND: Endometrial Cancer Stages I, N=19; II, N=1; III, N=19; IV, N=1	Endometrial Cancer Stages I, II, IIIC & IV vs Ovarian Cancer Stages I, II, III & IV	2D
66	RND: Control :abnromal endometrium not cancer, N=20	Endometrial Cancer Stages I, II, IIIC & IV vs Benign Gynecology	1C & 1D																	56	RND: Endometrial Cancer Stages I, N=19; II, N=1; III, N=19; IV, N=1	Endometrial Cancer Stages I, II, IIIC & IV vs Ovarian Cancer Stages I, II, III & IV	2D
69	RND: Control :abnromal endometrium not cancer, N=20	Endometrial Cancer Stages I, II, IIIC & IV vs Benign Gynecology	1C & 1D																	40	RND: Endometrial Cancer Stages I, N=19; II, N=1; III, N=19; IV, N=1	Endometrial Cancer Stages I, II, IIIC & IV vs Ovarian Cancer Stages I, II, III & IV	2D
73	RND: Control :abnromal endometrium not cancer, N=20	Endometrial Cancer Stages I, II, IIIC & IV vs Benign Gynecology	1C & 1D																	42	RND: Endometrial Cancer Stages I, N=19; II, N=1; III, N=19; IV, N=1	Endometrial Cancer Stages I, II, IIIC & IV vs Ovarian Cancer Stages I, II, III & IV	2D
71	RND: Control :abnromal endometrium not cancer, N=20	Endometrial Cancer Stages I, II, IIIC & IV vs Benign Gynecology	1C & 1D																	58	RND: Endometrial Cancer Stages I, N=19; II, N=1; III, N=19; IV, N=1	Endometrial Cancer Stages I, II, IIIC & IV vs Ovarian Cancer Stages I, II, III & IV	2D
																				44	RND: Endometrial Cancer Stages I, N=19; II, N=1; III, N=19; IV, N=1	Endometrial Cancer Stages I, II, IIIC & IV vs Ovarian Cancer Stages I, II, III & IV	2D
																				50	RND: Endometrial Cancer Stages I, N=19; II, N=1; III, N=19; IV, N=1	Endometrial Cancer Stages I, II, IIIC & IV vs Ovarian Cancer Stages I, II, III & IV	2D
																				60	RND: Endometrial Cancer Stages I, N=19; II, N=1; III, N=19; IV, N=1	Endometrial Cancer Stages I, II, IIIC & IV vs Ovarian Cancer Stages I, II, III & IV	2D
																				46	RND: Endometrial Cancer Stages I, N=19; II, N=1; III, N=19; IV, N=1	Endometrial Cancer Stages I, II, IIIC & IV vs Ovarian Cancer Stages I, II, III & IV	2D
																				52	RND: Endometrial Cancer Stages I, N=19; II, N=1; III, N=19; IV, N=1	Endometrial Cancer Stages I, II, IIIC & IV vs Ovarian Cancer Stages I, II, III & IV	2D
																				62	RND: Endometrial Cancer Stages I, N=19; II, N=1; III, N=19; IV, N=1	Endometrial Cancer Stages I, II, IIIC & IV vs Ovarian Cancer Stages I, II, III & IV	2D
																				64	RND: Endometrial Cancer Stages I, N=19; II, N=1; III, N=19; IV, N=1	Endometrial Cancer Stages I, II, IIIC & IV vs Ovarian Cancer Stages I, II, III & IV	2D
																				66	RND: Endometrial Cancer Stages I, N=19; II, N=1; III, N=19; IV, N=1	Endometrial Cancer Stages I, II, IIIC & IV vs Ovarian Cancer Stages I, II, III & IV	2D
																				72	RND: Endometrial Cancer Stages I, N=19; II, N=1; III, N=19; IV, N=1	Endometrial Cancer Stages I, II, IIIC & IV vs Ovarian Cancer Stages I, II, III & IV	2D
																				22	RND: Endometrial Cancer Stages I, N=19; II, N=1; III, N=19; IV, N=1	Endometrial Cancer Stages I, II, IIIC & IV vs Ovarian Cancer Stages I, II, III & IV	2D
																				1	RND: Endometrial Cancer Stages I, N=19; II, N=1; III, N=19; IV, N=1	Endometrial Cancer Stages I, II, IIIC & IV vs Ovarian Cancer Stages I, II, III & IV	2D
																				15	RND: Endometrial Cancer Stages I, N=19; II, N=1; III, N=19; IV, N=1	Endometrial Cancer Stages I, II, IIIC & IV vs Ovarian Cancer Stages I, II, III & IV	2D
																				7	RND: Endometrial Cancer Stages I, N=19; II, N=1; III, N=19; IV, N=1	Endometrial Cancer Stages I, II, IIIC & IV vs Ovarian Cancer Stages I, II, III & IV	2D
																				24	RND: Endometrial Cancer Stages I, N=19; II, N=1; III, N=19; IV, N=1	Endometrial Cancer Stages I, II, IIIC & IV vs Ovarian Cancer Stages I, II, III & IV	2D
																				9	RND: Endometrial Cancer Stages I, N=19; II, N=1; III, N=19; IV, N=1	Endometrial Cancer Stages I, II, IIIC & IV vs Ovarian Cancer Stages I, II, III & IV	2D
																				13	RND: Endometrial Cancer Stages I, N=19; II, N=1; III, N=19; IV, N=1	Endometrial Cancer Stages I, II, IIIC & IV vs Ovarian Cancer Stages I, II, III & IV	2D
																				3	RND: Endometrial Cancer Stages I, N=19; II, N=1; III, N=19; IV, N=1	Endometrial Cancer Stages I, II, IIIC & IV vs Ovarian Cancer Stages I, II, III & IV	2D
																				26	RND: Endometrial Cancer Stages I, N=19; II, N=1; III, N=19; IV, N=1	Endometrial Cancer Stages I, II, IIIC & IV vs Ovarian Cancer Stages I, II, III & IV	2D
																				28	RND: Endometrial Cancer Stages I, N=19; II, N=1; III, N=19; IV, N=1	Endometrial Cancer Stages I, II, IIIC & IV vs Ovarian Cancer Stages I, II, III & IV	2D
																				20	RND: Endometrial Cancer Stages I, N=19; II, N=1; III, N=19; IV, N=1	Endometrial Cancer Stages I, II, IIIC & IV vs Ovarian Cancer Stages I, II, III & IV	2D
																				11	RND: Endometrial Cancer Stages I, N=19; II, N=1; III, N=19; IV, N=1	Endometrial Cancer Stages I, II, IIIC & IV vs Ovarian Cancer Stages I, II, III & IV	2D
																				30	RND: Endometrial Cancer Stages I, N=19; II, N=1; III, N=19; IV, N=1	Endometrial Cancer Stages I, II, IIIC & IV vs Ovarian Cancer Stages I, II, III & IV	2D
																				34	RND: Endometrial Cancer Stages I, N=19; II, N=1; III, N=19; IV, N=1	Endometrial Cancer Stages I, II, IIIC & IV vs Ovarian Cancer Stages I, II, III & IV	2D
																				5	RND: Endometrial Cancer Stages I, N=19; II, N=1; III, N=19; IV, N=1	Endometrial Cancer Stages I, II, IIIC & IV vs Ovarian Cancer Stages I, II, III & IV	2D
																				18	RND: Endometrial Cancer Stages I, N=19; II, N=1; III, N=19; IV, N=1	Endometrial Cancer Stages I, II, IIIC & IV vs Ovarian Cancer Stages I, II, III & IV	2D
																				53	RND: Endometrial Cancer Stages I, N=19; II, N=1; III, N=19; IV, N=1	Endometrial Cancer Stages I, II, IIIC & IV vs Ovarian Cancer Stages I, II, III & IV	2D
																				71	RND: Endometrial Cancer Stages I, N=19; II, N=1; III, N=19; IV, N=1	Endometrial Cancer Stages I, II, IIIC & IV vs Ovarian Cancer Stages I, II, III & IV	2D
																				32	RND: Endometrial Cancer Stages I, N=19; II, N=1; III, N=19; IV, N=1	Endometrial Cancer Stages I, II, IIIC & IV vs Ovarian Cancer Stages I, II, III & IV	2D
