# Supplementary material for: The Role of Insulin-like Peptide in Maintaining Hemolymph Glucose Homeostasis in the Pacific White Shrimp Litopenaeus vannamei
Source: Int J Mol Sci. 2022 Mar 17;23(6):3268. doi: 10.3390/ijms23063268 (PMC8948857; doi:10.3390/ijms23063268)
Supplement: Supplementary file 1 [file ijms-23-03268-s001.zip › Supplementary SB. File SB3. LOOCV Significant peaks by test and figure.xlsx]

## Sheet: LOOCV Significant peaks by test
PEAK_M_Z	LOOCV test	Figure		PEAK_M_Z	LOOCV test	Figure		PEAK_M_Z	LOOCV test	Figure		PEAK_M_Z	LOOCV test	Figure		PEAK_M_Z	LOOCV test	Figure		PEAK_M_Z	LOOCV test	Figure		PEAK_M_Z	LOOCV test	Figure
409	Endometrial Cancer Stages I, II, IIIC & IV vs Benign Gynecology	1C & 1D		450	Endometrial Cancer Stages I & II vs Endometrial Cancer Stages IIIC & IV	2C		500	Endometrial Cancer Stages IIIC & IV vs Benign Gynecology	2B		401	Endometrial Cancer Stages I & II vs Benign Gynecology	2A		401	Endometrial Cancer Stages I, II, IIIC & IV vs Ovarian Cancer Stages I, II, III & IV	2D		409	Ovarian cancer stages III & IV vs Endometrial Cancer Stages III & IV	Supplemental		492	Ovarian cancer stages I & II vs Endometrial Cancer Stages I & II	Supplemental
426	Endometrial Cancer Stages I, II, IIIC & IV vs Benign Gynecology	1C & 1D		458	Endometrial Cancer Stages I & II vs Endometrial Cancer Stages IIIC & IV	2C		501	Endometrial Cancer Stages IIIC & IV vs Benign Gynecology	2B		426	Endometrial Cancer Stages I & II vs Benign Gynecology	2A		409	Endometrial Cancer Stages I, II, IIIC & IV vs Ovarian Cancer Stages I, II, III & IV	2D		411	Ovarian cancer stages III & IV vs Endometrial Cancer Stages III & IV	Supplemental		496	Ovarian cancer stages I & II vs Endometrial Cancer Stages I & II	Supplemental
443	Endometrial Cancer Stages I, II, IIIC & IV vs Benign Gynecology	1C & 1D		462	Endometrial Cancer Stages I & II vs Endometrial Cancer Stages IIIC & IV	2C		506	Endometrial Cancer Stages IIIC & IV vs Benign Gynecology	2B		428	Endometrial Cancer Stages I & II vs Benign Gynecology	2A		411	Endometrial Cancer Stages I, II, IIIC & IV vs Ovarian Cancer Stages I, II, III & IV	2D		414	Ovarian cancer stages III & IV vs Endometrial Cancer Stages III & IV	Supplemental		506	Ovarian cancer stages I & II vs Endometrial Cancer Stages I & II	Supplemental
454	Endometrial Cancer Stages I, II, IIIC & IV vs Benign Gynecology	1C & 1D		494	Endometrial Cancer Stages I & II vs Endometrial Cancer Stages IIIC & IV	2C		535	Endometrial Cancer Stages IIIC & IV vs Benign Gynecology	2B		443	Endometrial Cancer Stages I & II vs Benign Gynecology	2A		414	Endometrial Cancer Stages I, II, IIIC & IV vs Ovarian Cancer Stages I, II, III & IV	2D		415	Ovarian cancer stages III & IV vs Endometrial Cancer Stages III & IV	Supplemental		517	Ovarian cancer stages I & II vs Endometrial Cancer Stages I & II	Supplemental
457	Endometrial Cancer Stages I, II, IIIC & IV vs Benign Gynecology	1C & 1D		497	Endometrial Cancer Stages I & II vs Endometrial Cancer Stages IIIC & IV	2C		546	Endometrial Cancer Stages IIIC & IV vs Benign Gynecology	2B		453	Endometrial Cancer Stages I & II vs Benign Gynecology	2A		415	Endometrial Cancer Stages I, II, IIIC & IV vs Ovarian Cancer Stages I, II, III & IV	2D		437	Ovarian cancer stages III & IV vs Endometrial Cancer Stages III & IV	Supplemental		518	Ovarian cancer stages I & II vs Endometrial Cancer Stages I & II	Supplemental
458	Endometrial Cancer Stages I, II, IIIC & IV vs Benign Gynecology	1C & 1D		498	Endometrial Cancer Stages I & II vs Endometrial Cancer Stages IIIC & IV	2C		575	Endometrial Cancer Stages IIIC & IV vs Benign Gynecology	2B		454	Endometrial Cancer Stages I & II vs Benign Gynecology	2A		416	Endometrial Cancer Stages I, II, IIIC & IV vs Ovarian Cancer Stages I, II, III & IV	2D		445	Ovarian cancer stages III & IV vs Endometrial Cancer Stages III & IV	Supplemental		520	Ovarian cancer stages I & II vs Endometrial Cancer Stages I & II	Supplemental
465	Endometrial Cancer Stages I, II, IIIC & IV vs Benign Gynecology	1C & 1D		520	Endometrial Cancer Stages I & II vs Endometrial Cancer Stages IIIC & IV	2C		599	Endometrial Cancer Stages IIIC & IV vs Benign Gynecology	2B		457	Endometrial Cancer Stages I & II vs Benign Gynecology	2A		417	Endometrial Cancer Stages I, II, IIIC & IV vs Ovarian Cancer Stages I, II, III & IV	2D		449	Ovarian cancer stages III & IV vs Endometrial Cancer Stages III & IV	Supplemental		526	Ovarian cancer stages I & II vs Endometrial Cancer Stages I & II	Supplemental
467	Endometrial Cancer Stages I, II, IIIC & IV vs Benign Gynecology	1C & 1D		546	Endometrial Cancer Stages I & II vs Endometrial Cancer Stages IIIC & IV	2C		601	Endometrial Cancer Stages IIIC & IV vs Benign Gynecology	2B		462	Endometrial Cancer Stages I & II vs Benign Gynecology	2A		418	Endometrial Cancer Stages I, II, IIIC & IV vs Ovarian Cancer Stages I, II, III & IV	2D		467	Ovarian cancer stages III & IV vs Endometrial Cancer Stages III & IV	Supplemental		528	Ovarian cancer stages I & II vs Endometrial Cancer Stages I & II	Supplemental
473	Endometrial Cancer Stages I, II, IIIC & IV vs Benign Gynecology	1C & 1D		573	Endometrial Cancer Stages I & II vs Endometrial Cancer Stages IIIC & IV	2C		603	Endometrial Cancer Stages IIIC & IV vs Benign Gynecology	2B		465	Endometrial Cancer Stages I & II vs Benign Gynecology	2A		419	Endometrial Cancer Stages I, II, IIIC & IV vs Ovarian Cancer Stages I, II, III & IV	2D		482	Ovarian cancer stages III & IV vs Endometrial Cancer Stages III & IV	Supplemental		530	Ovarian cancer stages I & II vs Endometrial Cancer Stages I & II	Supplemental
483	Endometrial Cancer Stages I, II, IIIC & IV vs Benign Gynecology	1C & 1D		599	Endometrial Cancer Stages I & II vs Endometrial Cancer Stages IIIC & IV	2C		627	Endometrial Cancer Stages IIIC & IV vs Benign Gynecology	2B		467	Endometrial Cancer Stages I & II vs Benign Gynecology	2A		427	Endometrial Cancer Stages I, II, IIIC & IV vs Ovarian Cancer Stages I, II, III & IV	2D		488	Ovarian cancer stages III & IV vs Endometrial Cancer Stages III & IV	Supplemental		549	Ovarian cancer stages I & II vs Endometrial Cancer Stages I & II	Supplemental
497	Endometrial Cancer Stages I, II, IIIC & IV vs Benign Gynecology	1C & 1D		616	Endometrial Cancer Stages I & II vs Endometrial Cancer Stages IIIC & IV	2C		631	Endometrial Cancer Stages IIIC & IV vs Benign Gynecology	2B		473	Endometrial Cancer Stages I & II vs Benign Gynecology	2A		428	Endometrial Cancer Stages I, II, IIIC & IV vs Ovarian Cancer Stages I, II, III & IV	2D		489	Ovarian cancer stages III & IV vs Endometrial Cancer Stages III & IV	Supplemental		550	Ovarian cancer stages I & II vs Endometrial Cancer Stages I & II	Supplemental
500	Endometrial Cancer Stages I, II, IIIC & IV vs Benign Gynecology	1C & 1D		618	Endometrial Cancer Stages I & II vs Endometrial Cancer Stages IIIC & IV	2C		638	Endometrial Cancer Stages IIIC & IV vs Benign Gynecology	2B		497	Endometrial Cancer Stages I & II vs Benign Gynecology	2A		432	Endometrial Cancer Stages I, II, IIIC & IV vs Ovarian Cancer Stages I, II, III & IV	2D		504	Ovarian cancer stages III & IV vs Endometrial Cancer Stages III & IV	Supplemental		556	Ovarian cancer stages I & II vs Endometrial Cancer Stages I & II	Supplemental
506	Endometrial Cancer Stages I, II, IIIC & IV vs Benign Gynecology	1C & 1D		625	Endometrial Cancer Stages I & II vs Endometrial Cancer Stages IIIC & IV	2C		645	Endometrial Cancer Stages IIIC & IV vs Benign Gynecology	2B		506	Endometrial Cancer Stages I & II vs Benign Gynecology	2A		433	Endometrial Cancer Stages I, II, IIIC & IV vs Ovarian Cancer Stages I, II, III & IV	2D		505	Ovarian cancer stages III & IV vs Endometrial Cancer Stages III & IV	Supplemental		557	Ovarian cancer stages I & II vs Endometrial Cancer Stages I & II	Supplemental
535	Endometrial Cancer Stages I, II, IIIC & IV vs Benign Gynecology	1C & 1D		627	Endometrial Cancer Stages I & II vs Endometrial Cancer Stages IIIC & IV	2C		658	Endometrial Cancer Stages IIIC & IV vs Benign Gynecology	2B		508	Endometrial Cancer Stages I & II vs Benign Gynecology	2A		435	Endometrial Cancer Stages I, II, IIIC & IV vs Ovarian Cancer Stages I, II, III & IV	2D		509	Ovarian cancer stages III & IV vs Endometrial Cancer Stages III & IV	Supplemental		573	Ovarian cancer stages I & II vs Endometrial Cancer Stages I & II	Supplemental
579	Endometrial Cancer Stages I, II, IIIC & IV vs Benign Gynecology	1C & 1D		645	Endometrial Cancer Stages I & II vs Endometrial Cancer Stages IIIC & IV	2C		661	Endometrial Cancer Stages IIIC & IV vs Benign Gynecology	2B		521	Endometrial Cancer Stages I & II vs Benign Gynecology	2A		437	Endometrial Cancer Stages I, II, IIIC & IV vs Ovarian Cancer Stages I, II, III & IV	2D		527	Ovarian cancer stages III & IV vs Endometrial Cancer Stages III & IV	Supplemental		585	Ovarian cancer stages I & II vs Endometrial Cancer Stages I & II	Supplemental
603	Endometrial Cancer Stages I, II, IIIC & IV vs Benign Gynecology	1C & 1D		654	Endometrial Cancer Stages I & II vs Endometrial Cancer Stages IIIC & IV	2C		667	Endometrial Cancer Stages IIIC & IV vs Benign Gynecology	2B		522	Endometrial Cancer Stages I & II vs Benign Gynecology	2A		438	Endometrial Cancer Stages I, II, IIIC & IV vs Ovarian Cancer Stages I, II, III & IV	2D		584	Ovarian cancer stages III & IV vs Endometrial Cancer Stages III & IV	Supplemental		588	Ovarian cancer stages I & II vs Endometrial Cancer Stages I & II	Supplemental
604	Endometrial Cancer Stages I, II, IIIC & IV vs Benign Gynecology	1C & 1D		660	Endometrial Cancer Stages I & II vs Endometrial Cancer Stages IIIC & IV	2C		688	Endometrial Cancer Stages IIIC & IV vs Benign Gynecology	2B		528	Endometrial Cancer Stages I & II vs Benign Gynecology	2A		443	Endometrial Cancer Stages I, II, IIIC & IV vs Ovarian Cancer Stages I, II, III & IV	2D		598	Ovarian cancer stages III & IV vs Endometrial Cancer Stages III & IV	Supplemental		601	Ovarian cancer stages I & II vs Endometrial Cancer Stages I & II	Supplemental
638	Endometrial Cancer Stages I, II, IIIC & IV vs Benign Gynecology	1C & 1D		662	Endometrial Cancer Stages I & II vs Endometrial Cancer Stages IIIC & IV	2C		690	Endometrial Cancer Stages IIIC & IV vs Benign Gynecology	2B		537	Endometrial Cancer Stages I & II vs Benign Gynecology	2A		445	Endometrial Cancer Stages I, II, IIIC & IV vs Ovarian Cancer Stages I, II, III & IV	2D		637	Ovarian cancer stages III & IV vs Endometrial Cancer Stages III & IV	Supplemental		603	Ovarian cancer stages I & II vs Endometrial Cancer Stages I & II	Supplemental
658	Endometrial Cancer Stages I, II, IIIC & IV vs Benign Gynecology	1C & 1D		667	Endometrial Cancer Stages I & II vs Endometrial Cancer Stages IIIC & IV	2C		692	Endometrial Cancer Stages IIIC & IV vs Benign Gynecology	2B		549	Endometrial Cancer Stages I & II vs Benign Gynecology	2A		448	Endometrial Cancer Stages I, II, IIIC & IV vs Ovarian Cancer Stages I, II, III & IV	2D		657	Ovarian cancer stages III & IV vs Endometrial Cancer Stages III & IV	Supplemental		604	Ovarian cancer stages I & II vs Endometrial Cancer Stages I & II	Supplemental
661	Endometrial Cancer Stages I, II, IIIC & IV vs Benign Gynecology	1C & 1D		690	Endometrial Cancer Stages I & II vs Endometrial Cancer Stages IIIC & IV	2C		701	Endometrial Cancer Stages IIIC & IV vs Benign Gynecology	2B		555	Endometrial Cancer Stages I & II vs Benign Gynecology	2A		449	Endometrial Cancer Stages I, II, IIIC & IV vs Ovarian Cancer Stages I, II, III & IV	2D		658	Ovarian cancer stages III & IV vs Endometrial Cancer Stages III & IV	Supplemental		605	Ovarian cancer stages I & II vs Endometrial Cancer Stages I & II	Supplemental
671	Endometrial Cancer Stages I, II, IIIC & IV vs Benign Gynecology	1C & 1D		692	Endometrial Cancer Stages I & II vs Endometrial Cancer Stages IIIC & IV	2C		703	Endometrial Cancer Stages IIIC & IV vs Benign Gynecology	2B		603	Endometrial Cancer Stages I & II vs Benign Gynecology	2A		451	Endometrial Cancer Stages I, II, IIIC & IV vs Ovarian Cancer Stages I, II, III & IV	2D		661	Ovarian cancer stages III & IV vs Endometrial Cancer Stages III & IV	Supplemental		614	Ovarian cancer stages I & II vs Endometrial Cancer Stages I & II	Supplemental
692	Endometrial Cancer Stages I, II, IIIC & IV vs Benign Gynecology	1C & 1D		700	Endometrial Cancer Stages I & II vs Endometrial Cancer Stages IIIC & IV	2C		704	Endometrial Cancer Stages IIIC & IV vs Benign Gynecology	2B		610	Endometrial Cancer Stages I & II vs Benign Gynecology	2A		462	Endometrial Cancer Stages I, II, IIIC & IV vs Ovarian Cancer Stages I, II, III & IV	2D		677	Ovarian cancer stages III & IV vs Endometrial Cancer Stages III & IV	Supplemental		615	Ovarian cancer stages I & II vs Endometrial Cancer Stages I & II	Supplemental
700	Endometrial Cancer Stages I, II, IIIC & IV vs Benign Gynecology	1C & 1D		703	Endometrial Cancer Stages I & II vs Endometrial Cancer Stages IIIC & IV	2C		745	Endometrial Cancer Stages IIIC & IV vs Benign Gynecology	2B		616	Endometrial Cancer Stages I & II vs Benign Gynecology	2A		466	Endometrial Cancer Stages I, II, IIIC & IV vs Ovarian Cancer Stages I, II, III & IV	2D		685	Ovarian cancer stages III & IV vs Endometrial Cancer Stages III & IV	Supplemental		619	Ovarian cancer stages I & II vs Endometrial Cancer Stages I & II	Supplemental
701	Endometrial Cancer Stages I, II, IIIC & IV vs Benign Gynecology	1C & 1D		716	Endometrial Cancer Stages I & II vs Endometrial Cancer Stages IIIC & IV	2C		766	Endometrial Cancer Stages IIIC & IV vs Benign Gynecology	2B		638	Endometrial Cancer Stages I & II vs Benign Gynecology	2A		467	Endometrial Cancer Stages I, II, IIIC & IV vs Ovarian Cancer Stages I, II, III & IV	2D		703	Ovarian cancer stages III & IV vs Endometrial Cancer Stages III & IV	Supplemental		621	Ovarian cancer stages I & II vs Endometrial Cancer Stages I & II	Supplemental
704	Endometrial Cancer Stages I, II, IIIC & IV vs Benign Gynecology	1C & 1D		745	Endometrial Cancer Stages I & II vs Endometrial Cancer Stages IIIC & IV	2C		772	Endometrial Cancer Stages IIIC & IV vs Benign Gynecology	2B		656	Endometrial Cancer Stages I & II vs Benign Gynecology	2A		470	Endometrial Cancer Stages I, II, IIIC & IV vs Ovarian Cancer Stages I, II, III & IV	2D		704	Ovarian cancer stages III & IV vs Endometrial Cancer Stages III & IV	Supplemental		622	Ovarian cancer stages I & II vs Endometrial Cancer Stages I & II	Supplemental
724	Endometrial Cancer Stages I, II, IIIC & IV vs Benign Gynecology	1C & 1D		766	Endometrial Cancer Stages I & II vs Endometrial Cancer Stages IIIC & IV	2C		781	Endometrial Cancer Stages IIIC & IV vs Benign Gynecology	2B		662	Endometrial Cancer Stages I & II vs Benign Gynecology	2A		471	Endometrial Cancer Stages I, II, IIIC & IV vs Ovarian Cancer Stages I, II, III & IV	2D		713	Ovarian cancer stages III & IV vs Endometrial Cancer Stages III & IV	Supplemental		625	Ovarian cancer stages I & II vs Endometrial Cancer Stages I & II	Supplemental
740	Endometrial Cancer Stages I, II, IIIC & IV vs Benign Gynecology	1C & 1D		774	Endometrial Cancer Stages I & II vs Endometrial Cancer Stages IIIC & IV	2C		782	Endometrial Cancer Stages IIIC & IV vs Benign Gynecology	2B		664	Endometrial Cancer Stages I & II vs Benign Gynecology	2A		472	Endometrial Cancer Stages I, II, IIIC & IV vs Ovarian Cancer Stages I, II, III & IV	2D		721	Ovarian cancer stages III & IV vs Endometrial Cancer Stages III & IV	Supplemental		626	Ovarian cancer stages I & II vs Endometrial Cancer Stages I & II	Supplemental
745	Endometrial Cancer Stages I, II, IIIC & IV vs Benign Gynecology	1C & 1D		806	Endometrial Cancer Stages I & II vs Endometrial Cancer Stages IIIC & IV	2C		813	Endometrial Cancer Stages IIIC & IV vs Benign Gynecology	2B		671	Endometrial Cancer Stages I & II vs Benign Gynecology	2A		473	Endometrial Cancer Stages I, II, IIIC & IV vs Ovarian Cancer Stages I, II, III & IV	2D		722	Ovarian cancer stages III & IV vs Endometrial Cancer Stages III & IV	Supplemental		627	Ovarian cancer stages I & II vs Endometrial Cancer Stages I & II	Supplemental
766	Endometrial Cancer Stages I, II, IIIC & IV vs Benign Gynecology	1C & 1D		823	Endometrial Cancer Stages I & II vs Endometrial Cancer Stages IIIC & IV	2C		861	Endometrial Cancer Stages IIIC & IV vs Benign Gynecology	2B		700	Endometrial Cancer Stages I & II vs Benign Gynecology	2A		480	Endometrial Cancer Stages I, II, IIIC & IV vs Ovarian Cancer Stages I, II, III & IV	2D		739	Ovarian cancer stages III & IV vs Endometrial Cancer Stages III & IV	Supplemental		628	Ovarian cancer stages I & II vs Endometrial Cancer Stages I & II	Supplemental
772	Endometrial Cancer Stages I, II, IIIC & IV vs Benign Gynecology	1C & 1D		826	Endometrial Cancer Stages I & II vs Endometrial Cancer Stages IIIC & IV	2C		879	Endometrial Cancer Stages IIIC & IV vs Benign Gynecology	2B		701	Endometrial Cancer Stages I & II vs Benign Gynecology	2A		481	Endometrial Cancer Stages I, II, IIIC & IV vs Ovarian Cancer Stages I, II, III & IV	2D		740	Ovarian cancer stages III & IV vs Endometrial Cancer Stages III & IV	Supplemental		629	Ovarian cancer stages I & II vs Endometrial Cancer Stages I & II	Supplemental
781	Endometrial Cancer Stages I, II, IIIC & IV vs Benign Gynecology	1C & 1D		839	Endometrial Cancer Stages I & II vs Endometrial Cancer Stages IIIC & IV	2C		902	Endometrial Cancer Stages IIIC & IV vs Benign Gynecology	2B		716	Endometrial Cancer Stages I & II vs Benign Gynecology	2A		482	Endometrial Cancer Stages I, II, IIIC & IV vs Ovarian Cancer Stages I, II, III & IV	2D		758	Ovarian cancer stages III & IV vs Endometrial Cancer Stages III & IV	Supplemental		631	Ovarian cancer stages I & II vs Endometrial Cancer Stages I & II	Supplemental
810	Endometrial Cancer Stages I, II, IIIC & IV vs Benign Gynecology	1C & 1D		841	Endometrial Cancer Stages I & II vs Endometrial Cancer Stages IIIC & IV	2C		907	Endometrial Cancer Stages IIIC & IV vs Benign Gynecology	2B		724	Endometrial Cancer Stages I & II vs Benign Gynecology	2A		486	Endometrial Cancer Stages I, II, IIIC & IV vs Ovarian Cancer Stages I, II, III & IV	2D		759	Ovarian cancer stages III & IV vs Endometrial Cancer Stages III & IV	Supplemental		635	Ovarian cancer stages I & II vs Endometrial Cancer Stages I & II	Supplemental
813	Endometrial Cancer Stages I, II, IIIC & IV vs Benign Gynecology	1C & 1D		914	Endometrial Cancer Stages I & II vs Endometrial Cancer Stages IIIC & IV	2C		932	Endometrial Cancer Stages IIIC & IV vs Benign Gynecology	2B		726	Endometrial Cancer Stages I & II vs Benign Gynecology	2A		487	Endometrial Cancer Stages I, II, IIIC & IV vs Ovarian Cancer Stages I, II, III & IV	2D		763	Ovarian cancer stages III & IV vs Endometrial Cancer Stages III & IV	Supplemental		637	Ovarian cancer stages I & II vs Endometrial Cancer Stages I & II	Supplemental
822	Endometrial Cancer Stages I, II, IIIC & IV vs Benign Gynecology	1C & 1D		952	Endometrial Cancer Stages I & II vs Endometrial Cancer Stages IIIC & IV	2C		956	Endometrial Cancer Stages IIIC & IV vs Benign Gynecology	2B		740	Endometrial Cancer Stages I & II vs Benign Gynecology	2A		488	Endometrial Cancer Stages I, II, IIIC & IV vs Ovarian Cancer Stages I, II, III & IV	2D		781	Ovarian cancer stages III & IV vs Endometrial Cancer Stages III & IV	Supplemental		638	Ovarian cancer stages I & II vs Endometrial Cancer Stages I & II	Supplemental
831	Endometrial Cancer Stages I, II, IIIC & IV vs Benign Gynecology	1C & 1D		953	Endometrial Cancer Stages I & II vs Endometrial Cancer Stages IIIC & IV	2C		958	Endometrial Cancer Stages IIIC & IV vs Benign Gynecology	2B		777	Endometrial Cancer Stages I & II vs Benign Gynecology	2A		489	Endometrial Cancer Stages I, II, IIIC & IV vs Ovarian Cancer Stages I, II, III & IV	2D		782	Ovarian cancer stages III & IV vs Endometrial Cancer Stages III & IV	Supplemental		644	Ovarian cancer stages I & II vs Endometrial Cancer Stages I & II	Supplemental
858	Endometrial Cancer Stages I, II, IIIC & IV vs Benign Gynecology	1C & 1D		956	Endometrial Cancer Stages I & II vs Endometrial Cancer Stages IIIC & IV	2C		980	Endometrial Cancer Stages IIIC & IV vs Benign Gynecology	2B		781	Endometrial Cancer Stages I & II vs Benign Gynecology	2A		492	Endometrial Cancer Stages I, II, IIIC & IV vs Ovarian Cancer Stages I, II, III & IV	2D		795	Ovarian cancer stages III & IV vs Endometrial Cancer Stages III & IV	Supplemental		648	Ovarian cancer stages I & II vs Endometrial Cancer Stages I & II	Supplemental
861	Endometrial Cancer Stages I, II, IIIC & IV vs Benign Gynecology	1C & 1D		977	Endometrial Cancer Stages I & II vs Endometrial Cancer Stages IIIC & IV	2C		986	Endometrial Cancer Stages IIIC & IV vs Benign Gynecology	2B		810	Endometrial Cancer Stages I & II vs Benign Gynecology	2A		496	Endometrial Cancer Stages I, II, IIIC & IV vs Ovarian Cancer Stages I, II, III & IV	2D		796	Ovarian cancer stages III & IV vs Endometrial Cancer Stages III & IV	Supplemental		651	Ovarian cancer stages I & II vs Endometrial Cancer Stages I & II	Supplemental
879	Endometrial Cancer Stages I, II, IIIC & IV vs Benign Gynecology	1C & 1D		992	Endometrial Cancer Stages I & II vs Endometrial Cancer Stages IIIC & IV	2C		989	Endometrial Cancer Stages IIIC & IV vs Benign Gynecology	2B		822	Endometrial Cancer Stages I & II vs Benign Gynecology	2A		498	Endometrial Cancer Stages I, II, IIIC & IV vs Ovarian Cancer Stages I, II, III & IV	2D		797	Ovarian cancer stages III & IV vs Endometrial Cancer Stages III & IV	Supplemental		654	Ovarian cancer stages I & II vs Endometrial Cancer Stages I & II	Supplemental
885	Endometrial Cancer Stages I, II, IIIC & IV vs Benign Gynecology	1C & 1D		996	Endometrial Cancer Stages I & II vs Endometrial Cancer Stages IIIC & IV	2C		996	Endometrial Cancer Stages IIIC & IV vs Benign Gynecology	2B		831	Endometrial Cancer Stages I & II vs Benign Gynecology	2A		505	Endometrial Cancer Stages I, II, IIIC & IV vs Ovarian Cancer Stages I, II, III & IV	2D		798	Ovarian cancer stages III & IV vs Endometrial Cancer Stages III & IV	Supplemental		657	Ovarian cancer stages I & II vs Endometrial Cancer Stages I & II	Supplemental
902	Endometrial Cancer Stages I, II, IIIC & IV vs Benign Gynecology	1C & 1D		999	Endometrial Cancer Stages I & II vs Endometrial Cancer Stages IIIC & IV	2C		1014	Endometrial Cancer Stages IIIC & IV vs Benign Gynecology	2B		841	Endometrial Cancer Stages I & II vs Benign Gynecology	2A		506	Endometrial Cancer Stages I, II, IIIC & IV vs Ovarian Cancer Stages I, II, III & IV	2D		803	Ovarian cancer stages III & IV vs Endometrial Cancer Stages III & IV	Supplemental		670	Ovarian cancer stages I & II vs Endometrial Cancer Stages I & II	Supplemental
906	Endometrial Cancer Stages I, II, IIIC & IV vs Benign Gynecology	1C & 1D		1002	Endometrial Cancer Stages I & II vs Endometrial Cancer Stages IIIC & IV	2C		1016	Endometrial Cancer Stages IIIC & IV vs Benign Gynecology	2B		842	Endometrial Cancer Stages I & II vs Benign Gynecology	2A		509	Endometrial Cancer Stages I, II, IIIC & IV vs Ovarian Cancer Stages I, II, III & IV	2D		804	Ovarian cancer stages III & IV vs Endometrial Cancer Stages III & IV	Supplemental		673	Ovarian cancer stages I & II vs Endometrial Cancer Stages I & II	Supplemental
907	Endometrial Cancer Stages I, II, IIIC & IV vs Benign Gynecology	1C & 1D		1016	Endometrial Cancer Stages I & II vs Endometrial Cancer Stages IIIC & IV	2C		1026	Endometrial Cancer Stages IIIC & IV vs Benign Gynecology	2B		858	Endometrial Cancer Stages I & II vs Benign Gynecology	2A		514	Endometrial Cancer Stages I, II, IIIC & IV vs Ovarian Cancer Stages I, II, III & IV	2D		826	Ovarian cancer stages III & IV vs Endometrial Cancer Stages III & IV	Supplemental		678	Ovarian cancer stages I & II vs Endometrial Cancer Stages I & II	Supplemental
923	Endometrial Cancer Stages I, II, IIIC & IV vs Benign Gynecology	1C & 1D		1034	Endometrial Cancer Stages I & II vs Endometrial Cancer Stages IIIC & IV	2C		1034	Endometrial Cancer Stages IIIC & IV vs Benign Gynecology	2B		864	Endometrial Cancer Stages I & II vs Benign Gynecology	2A		516	Endometrial Cancer Stages I, II, IIIC & IV vs Ovarian Cancer Stages I, II, III & IV	2D		827	Ovarian cancer stages III & IV vs Endometrial Cancer Stages III & IV	Supplemental		679	Ovarian cancer stages I & II vs Endometrial Cancer Stages I & II	Supplemental
930	Endometrial Cancer Stages I, II, IIIC & IV vs Benign Gynecology	1C & 1D		1035	Endometrial Cancer Stages I & II vs Endometrial Cancer Stages IIIC & IV	2C		1035	Endometrial Cancer Stages IIIC & IV vs Benign Gynecology	2B		879	Endometrial Cancer Stages I & II vs Benign Gynecology	2A		517	Endometrial Cancer Stages I, II, IIIC & IV vs Ovarian Cancer Stages I, II, III & IV	2D		828	Ovarian cancer stages III & IV vs Endometrial Cancer Stages III & IV	Supplemental		681	Ovarian cancer stages I & II vs Endometrial Cancer Stages I & II	Supplemental
932	Endometrial Cancer Stages I, II, IIIC & IV vs Benign Gynecology	1C & 1D		1066	Endometrial Cancer Stages I & II vs Endometrial Cancer Stages IIIC & IV	2C		1047	Endometrial Cancer Stages IIIC & IV vs Benign Gynecology	2B		885	Endometrial Cancer Stages I & II vs Benign Gynecology	2A		518	Endometrial Cancer Stages I, II, IIIC & IV vs Ovarian Cancer Stages I, II, III & IV	2D		837	Ovarian cancer stages III & IV vs Endometrial Cancer Stages III & IV	Supplemental		682	Ovarian cancer stages I & II vs Endometrial Cancer Stages I & II	Supplemental
951	Endometrial Cancer Stages I, II, IIIC & IV vs Benign Gynecology	1C & 1D		1097	Endometrial Cancer Stages I & II vs Endometrial Cancer Stages IIIC & IV	2C		1056	Endometrial Cancer Stages IIIC & IV vs Benign Gynecology	2B		906	Endometrial Cancer Stages I & II vs Benign Gynecology	2A		528	Endometrial Cancer Stages I, II, IIIC & IV vs Ovarian Cancer Stages I, II, III & IV	2D		842	Ovarian cancer stages III & IV vs Endometrial Cancer Stages III & IV	Supplemental		683	Ovarian cancer stages I & II vs Endometrial Cancer Stages I & II	Supplemental
986	Endometrial Cancer Stages I, II, IIIC & IV vs Benign Gynecology	1C & 1D		1103	Endometrial Cancer Stages I & II vs Endometrial Cancer Stages IIIC & IV	2C		1063	Endometrial Cancer Stages IIIC & IV vs Benign Gynecology	2B		907	Endometrial Cancer Stages I & II vs Benign Gynecology	2A		530	Endometrial Cancer Stages I, II, IIIC & IV vs Ovarian Cancer Stages I, II, III & IV	2D		852	Ovarian cancer stages III & IV vs Endometrial Cancer Stages III & IV	Supplemental		685	Ovarian cancer stages I & II vs Endometrial Cancer Stages I & II	Supplemental
1014	Endometrial Cancer Stages I, II, IIIC & IV vs Benign Gynecology	1C & 1D		1116	Endometrial Cancer Stages I & II vs Endometrial Cancer Stages IIIC & IV	2C		1065	Endometrial Cancer Stages IIIC & IV vs Benign Gynecology	2B		910	Endometrial Cancer Stages I & II vs Benign Gynecology	2A		549	Endometrial Cancer Stages I, II, IIIC & IV vs Ovarian Cancer Stages I, II, III & IV	2D		883	Ovarian cancer stages III & IV vs Endometrial Cancer Stages III & IV	Supplemental		688	Ovarian cancer stages I & II vs Endometrial Cancer Stages I & II	Supplemental
1025	Endometrial Cancer Stages I, II, IIIC & IV vs Benign Gynecology	1C & 1D		1138	Endometrial Cancer Stages I & II vs Endometrial Cancer Stages IIIC & IV	2C		1066	Endometrial Cancer Stages IIIC & IV vs Benign Gynecology	2B		923	Endometrial Cancer Stages I & II vs Benign Gynecology	2A		556	Endometrial Cancer Stages I, II, IIIC & IV vs Ovarian Cancer Stages I, II, III & IV	2D		907	Ovarian cancer stages III & IV vs Endometrial Cancer Stages III & IV	Supplemental		703	Ovarian cancer stages I & II vs Endometrial Cancer Stages I & II	Supplemental
1036	Endometrial Cancer Stages I, II, IIIC & IV vs Benign Gynecology	1C & 1D		1149	Endometrial Cancer Stages I & II vs Endometrial Cancer Stages IIIC & IV	2C		1075	Endometrial Cancer Stages IIIC & IV vs Benign Gynecology	2B		930	Endometrial Cancer Stages I & II vs Benign Gynecology	2A		557	Endometrial Cancer Stages I, II, IIIC & IV vs Ovarian Cancer Stages I, II, III & IV	2D		908	Ovarian cancer stages III & IV vs Endometrial Cancer Stages III & IV	Supplemental		704	Ovarian cancer stages I & II vs Endometrial Cancer Stages I & II	Supplemental
1045	Endometrial Cancer Stages I, II, IIIC & IV vs Benign Gynecology	1C & 1D		1153	Endometrial Cancer Stages I & II vs Endometrial Cancer Stages IIIC & IV	2C		1088	Endometrial Cancer Stages IIIC & IV vs Benign Gynecology	2B		951	Endometrial Cancer Stages I & II vs Benign Gynecology	2A		570	Endometrial Cancer Stages I, II, IIIC & IV vs Ovarian Cancer Stages I, II, III & IV	2D		937	Ovarian cancer stages III & IV vs Endometrial Cancer Stages III & IV	Supplemental		707	Ovarian cancer stages I & II vs Endometrial Cancer Stages I & II	Supplemental
1056	Endometrial Cancer Stages I, II, IIIC & IV vs Benign Gynecology	1C & 1D		1162	Endometrial Cancer Stages I & II vs Endometrial Cancer Stages IIIC & IV	2C		1090	Endometrial Cancer Stages IIIC & IV vs Benign Gynecology	2B		953	Endometrial Cancer Stages I & II vs Benign Gynecology	2A		585	Endometrial Cancer Stages I, II, IIIC & IV vs Ovarian Cancer Stages I, II, III & IV	2D		946	Ovarian cancer stages III & IV vs Endometrial Cancer Stages III & IV	Supplemental		711	Ovarian cancer stages I & II vs Endometrial Cancer Stages I & II	Supplemental
1065	Endometrial Cancer Stages I, II, IIIC & IV vs Benign Gynecology	1C & 1D		1169	Endometrial Cancer Stages I & II vs Endometrial Cancer Stages IIIC & IV	2C		1092	Endometrial Cancer Stages IIIC & IV vs Benign Gynecology	2B		977	Endometrial Cancer Stages I & II vs Benign Gynecology	2A		588	Endometrial Cancer Stages I, II, IIIC & IV vs Ovarian Cancer Stages I, II, III & IV	2D		949	Ovarian cancer stages III & IV vs Endometrial Cancer Stages III & IV	Supplemental		713	Ovarian cancer stages I & II vs Endometrial Cancer Stages I & II	Supplemental
1085	Endometrial Cancer Stages I, II, IIIC & IV vs Benign Gynecology	1C & 1D		1178	Endometrial Cancer Stages I & II vs Endometrial Cancer Stages IIIC & IV	2C		1097	Endometrial Cancer Stages IIIC & IV vs Benign Gynecology	2B		986	Endometrial Cancer Stages I & II vs Benign Gynecology	2A		589	Endometrial Cancer Stages I, II, IIIC & IV vs Ovarian Cancer Stages I, II, III & IV	2D		956	Ovarian cancer stages III & IV vs Endometrial Cancer Stages III & IV	Supplemental		721	Ovarian cancer stages I & II vs Endometrial Cancer Stages I & II	Supplemental
1088	Endometrial Cancer Stages I, II, IIIC & IV vs Benign Gynecology	1C & 1D		1190	Endometrial Cancer Stages I & II vs Endometrial Cancer Stages IIIC & IV	2C		1101	Endometrial Cancer Stages IIIC & IV vs Benign Gynecology	2B		999	Endometrial Cancer Stages I & II vs Benign Gynecology	2A		601	Endometrial Cancer Stages I, II, IIIC & IV vs Ovarian Cancer Stages I, II, III & IV	2D		966	Ovarian cancer stages III & IV vs Endometrial Cancer Stages III & IV	Supplemental		722	Ovarian cancer stages I & II vs Endometrial Cancer Stages I & II	Supplemental
1089	Endometrial Cancer Stages I, II, IIIC & IV vs Benign Gynecology	1C & 1D		1192	Endometrial Cancer Stages I & II vs Endometrial Cancer Stages IIIC & IV	2C		1102	Endometrial Cancer Stages IIIC & IV vs Benign Gynecology	2B		1021	Endometrial Cancer Stages I & II vs Benign Gynecology	2A		603	Endometrial Cancer Stages I, II, IIIC & IV vs Ovarian Cancer Stages I, II, III & IV	2D		969	Ovarian cancer stages III & IV vs Endometrial Cancer Stages III & IV	Supplemental		728	Ovarian cancer stages I & II vs Endometrial Cancer Stages I & II	Supplemental
1090	Endometrial Cancer Stages I, II, IIIC & IV vs Benign Gynecology	1C & 1D		1200	Endometrial Cancer Stages I & II vs Endometrial Cancer Stages IIIC & IV	2C		1113	Endometrial Cancer Stages IIIC & IV vs Benign Gynecology	2B		1024	Endometrial Cancer Stages I & II vs Benign Gynecology	2A		604	Endometrial Cancer Stages I, II, IIIC & IV vs Ovarian Cancer Stages I, II, III & IV	2D		970	Ovarian cancer stages III & IV vs Endometrial Cancer Stages III & IV	Supplemental		729	Ovarian cancer stages I & II vs Endometrial Cancer Stages I & II	Supplemental
1092	Endometrial Cancer Stages I, II, IIIC & IV vs Benign Gynecology	1C & 1D		1221	Endometrial Cancer Stages I & II vs Endometrial Cancer Stages IIIC & IV	2C		1118	Endometrial Cancer Stages IIIC & IV vs Benign Gynecology	2B		1025	Endometrial Cancer Stages I & II vs Benign Gynecology	2A		605	Endometrial Cancer Stages I, II, IIIC & IV vs Ovarian Cancer Stages I, II, III & IV	2D		984	Ovarian cancer stages III & IV vs Endometrial Cancer Stages III & IV	Supplemental		731	Ovarian cancer stages I & II vs Endometrial Cancer Stages I & II	Supplemental
1107	Endometrial Cancer Stages I, II, IIIC & IV vs Benign Gynecology	1C & 1D		1247	Endometrial Cancer Stages I & II vs Endometrial Cancer Stages IIIC & IV	2C		1120	Endometrial Cancer Stages IIIC & IV vs Benign Gynecology	2B		1028	Endometrial Cancer Stages I & II vs Benign Gynecology	2A		615	Endometrial Cancer Stages I, II, IIIC & IV vs Ovarian Cancer Stages I, II, III & IV	2D		986	Ovarian cancer stages III & IV vs Endometrial Cancer Stages III & IV	Supplemental		736	Ovarian cancer stages I & II vs Endometrial Cancer Stages I & II	Supplemental
1122	Endometrial Cancer Stages I, II, IIIC & IV vs Benign Gynecology	1C & 1D		1263	Endometrial Cancer Stages I & II vs Endometrial Cancer Stages IIIC & IV	2C		1128	Endometrial Cancer Stages IIIC & IV vs Benign Gynecology	2B		1036	Endometrial Cancer Stages I & II vs Benign Gynecology	2A		621	Endometrial Cancer Stages I, II, IIIC & IV vs Ovarian Cancer Stages I, II, III & IV	2D		996	Ovarian cancer stages III & IV vs Endometrial Cancer Stages III & IV	Supplemental		738	Ovarian cancer stages I & II vs Endometrial Cancer Stages I & II	Supplemental
1128	Endometrial Cancer Stages I, II, IIIC & IV vs Benign Gynecology	1C & 1D		1265	Endometrial Cancer Stages I & II vs Endometrial Cancer Stages IIIC & IV	2C		1131	Endometrial Cancer Stages IIIC & IV vs Benign Gynecology	2B		1056	Endometrial Cancer Stages I & II vs Benign Gynecology	2A		626	Endometrial Cancer Stages I, II, IIIC & IV vs Ovarian Cancer Stages I, II, III & IV	2D		1004	Ovarian cancer stages III & IV vs Endometrial Cancer Stages III & IV	Supplemental		740	Ovarian cancer stages I & II vs Endometrial Cancer Stages I & II	Supplemental
1131	Endometrial Cancer Stages I, II, IIIC & IV vs Benign Gynecology	1C & 1D		1273	Endometrial Cancer Stages I & II vs Endometrial Cancer Stages IIIC & IV	2C		1138	Endometrial Cancer Stages IIIC & IV vs Benign Gynecology	2B		1058	Endometrial Cancer Stages I & II vs Benign Gynecology	2A		628	Endometrial Cancer Stages I, II, IIIC & IV vs Ovarian Cancer Stages I, II, III & IV	2D		1036	Ovarian cancer stages III & IV vs Endometrial Cancer Stages III & IV	Supplemental		741	Ovarian cancer stages I & II vs Endometrial Cancer Stages I & II	Supplemental
1144	Endometrial Cancer Stages I, II, IIIC & IV vs Benign Gynecology	1C & 1D		1275	Endometrial Cancer Stages I & II vs Endometrial Cancer Stages IIIC & IV	2C		1153	Endometrial Cancer Stages IIIC & IV vs Benign Gynecology	2B		1065	Endometrial Cancer Stages I & II vs Benign Gynecology	2A		629	Endometrial Cancer Stages I, II, IIIC & IV vs Ovarian Cancer Stages I, II, III & IV	2D		1037	Ovarian cancer stages III & IV vs Endometrial Cancer Stages III & IV	Supplemental		751	Ovarian cancer stages I & II vs Endometrial Cancer Stages I & II	Supplemental
1160	Endometrial Cancer Stages I, II, IIIC & IV vs Benign Gynecology	1C & 1D		1297	Endometrial Cancer Stages I & II vs Endometrial Cancer Stages IIIC & IV	2C		1160	Endometrial Cancer Stages IIIC & IV vs Benign Gynecology	2B		1088	Endometrial Cancer Stages I & II vs Benign Gynecology	2A		631	Endometrial Cancer Stages I, II, IIIC & IV vs Ovarian Cancer Stages I, II, III & IV	2D		1041	Ovarian cancer stages III & IV vs Endometrial Cancer Stages III & IV	Supplemental		778	Ovarian cancer stages I & II vs Endometrial Cancer Stages I & II	Supplemental
1164	Endometrial Cancer Stages I, II, IIIC & IV vs Benign Gynecology	1C & 1D		1326	Endometrial Cancer Stages I & II vs Endometrial Cancer Stages IIIC & IV	2C		1164	Endometrial Cancer Stages IIIC & IV vs Benign Gynecology	2B		1089	Endometrial Cancer Stages I & II vs Benign Gynecology	2A		633	Endometrial Cancer Stages I, II, IIIC & IV vs Ovarian Cancer Stages I, II, III & IV	2D		1042	Ovarian cancer stages III & IV vs Endometrial Cancer Stages III & IV	Supplemental		781	Ovarian cancer stages I & II vs Endometrial Cancer Stages I & II	Supplemental
1174	Endometrial Cancer Stages I, II, IIIC & IV vs Benign Gynecology	1C & 1D		1349	Endometrial Cancer Stages I & II vs Endometrial Cancer Stages IIIC & IV	2C		1174	Endometrial Cancer Stages IIIC & IV vs Benign Gynecology	2B		1107	Endometrial Cancer Stages I & II vs Benign Gynecology	2A		634	Endometrial Cancer Stages I, II, IIIC & IV vs Ovarian Cancer Stages I, II, III & IV	2D		1043	Ovarian cancer stages III & IV vs Endometrial Cancer Stages III & IV	Supplemental		795	Ovarian cancer stages I & II vs Endometrial Cancer Stages I & II	Supplemental
1180	Endometrial Cancer Stages I, II, IIIC & IV vs Benign Gynecology	1C & 1D		1358	Endometrial Cancer Stages I & II vs Endometrial Cancer Stages IIIC & IV	2C		1180	Endometrial Cancer Stages IIIC & IV vs Benign Gynecology	2B		1129	Endometrial Cancer Stages I & II vs Benign Gynecology	2A		635	Endometrial Cancer Stages I, II, IIIC & IV vs Ovarian Cancer Stages I, II, III & IV	2D		1065	Ovarian cancer stages III & IV vs Endometrial Cancer Stages III & IV	Supplemental		796	Ovarian cancer stages I & II vs Endometrial Cancer Stages I & II	Supplemental
1187	Endometrial Cancer Stages I, II, IIIC & IV vs Benign Gynecology	1C & 1D		1366	Endometrial Cancer Stages I & II vs Endometrial Cancer Stages IIIC & IV	2C		1194	Endometrial Cancer Stages IIIC & IV vs Benign Gynecology	2B		1132	Endometrial Cancer Stages I & II vs Benign Gynecology	2A		637	Endometrial Cancer Stages I, II, IIIC & IV vs Ovarian Cancer Stages I, II, III & IV	2D		1081	Ovarian cancer stages III & IV vs Endometrial Cancer Stages III & IV	Supplemental		798	Ovarian cancer stages I & II vs Endometrial Cancer Stages I & II	Supplemental
1197	Endometrial Cancer Stages I, II, IIIC & IV vs Benign Gynecology	1C & 1D		1377	Endometrial Cancer Stages I & II vs Endometrial Cancer Stages IIIC & IV	2C		1205	Endometrial Cancer Stages IIIC & IV vs Benign Gynecology	2B		1174	Endometrial Cancer Stages I & II vs Benign Gynecology	2A		644	Endometrial Cancer Stages I, II, IIIC & IV vs Ovarian Cancer Stages I, II, III & IV	2D		1082	Ovarian cancer stages III & IV vs Endometrial Cancer Stages III & IV	Supplemental		799	Ovarian cancer stages I & II vs Endometrial Cancer Stages I & II	Supplemental
1215	Endometrial Cancer Stages I, II, IIIC & IV vs Benign Gynecology	1C & 1D		1387	Endometrial Cancer Stages I & II vs Endometrial Cancer Stages IIIC & IV	2C		1212	Endometrial Cancer Stages IIIC & IV vs Benign Gynecology	2B		1215	Endometrial Cancer Stages I & II vs Benign Gynecology	2A		649	Endometrial Cancer Stages I, II, IIIC & IV vs Ovarian Cancer Stages I, II, III & IV	2D		1093	Ovarian cancer stages III & IV vs Endometrial Cancer Stages III & IV	Supplemental		803	Ovarian cancer stages I & II vs Endometrial Cancer Stages I & II	Supplemental
1238	Endometrial Cancer Stages I, II, IIIC & IV vs Benign Gynecology	1C & 1D		1388	Endometrial Cancer Stages I & II vs Endometrial Cancer Stages IIIC & IV	2C		1215	Endometrial Cancer Stages IIIC & IV vs Benign Gynecology	2B		1265	Endometrial Cancer Stages I & II vs Benign Gynecology	2A		651	Endometrial Cancer Stages I, II, IIIC & IV vs Ovarian Cancer Stages I, II, III & IV	2D		1115	Ovarian cancer stages III & IV vs Endometrial Cancer Stages III & IV	Supplemental		818	Ovarian cancer stages I & II vs Endometrial Cancer Stages I & II	Supplemental
1272	Endometrial Cancer Stages I, II, IIIC & IV vs Benign Gynecology	1C & 1D		1400	Endometrial Cancer Stages I & II vs Endometrial Cancer Stages IIIC & IV	2C		1272	Endometrial Cancer Stages IIIC & IV vs Benign Gynecology	2B		1286	Endometrial Cancer Stages I & II vs Benign Gynecology	2A		652	Endometrial Cancer Stages I, II, IIIC & IV vs Ovarian Cancer Stages I, II, III & IV	2D		1124	Ovarian cancer stages III & IV vs Endometrial Cancer Stages III & IV	Supplemental		827	Ovarian cancer stages I & II vs Endometrial Cancer Stages I & II	Supplemental
1312	Endometrial Cancer Stages I, II, IIIC & IV vs Benign Gynecology	1C & 1D		1415	Endometrial Cancer Stages I & II vs Endometrial Cancer Stages IIIC & IV	2C		1273	Endometrial Cancer Stages IIIC & IV vs Benign Gynecology	2B		1319	Endometrial Cancer Stages I & II vs Benign Gynecology	2A		654	Endometrial Cancer Stages I, II, IIIC & IV vs Ovarian Cancer Stages I, II, III & IV	2D		1125	Ovarian cancer stages III & IV vs Endometrial Cancer Stages III & IV	Supplemental		828	Ovarian cancer stages I & II vs Endometrial Cancer Stages I & II	Supplemental
1316	Endometrial Cancer Stages I, II, IIIC & IV vs Benign Gynecology	1C & 1D		1416	Endometrial Cancer Stages I & II vs Endometrial Cancer Stages IIIC & IV	2C		1304	Endometrial Cancer Stages IIIC & IV vs Benign Gynecology	2B		1326	Endometrial Cancer Stages I & II vs Benign Gynecology	2A		657	Endometrial Cancer Stages I, II, IIIC & IV vs Ovarian Cancer Stages I, II, III & IV	2D		1128	Ovarian cancer stages III & IV vs Endometrial Cancer Stages III & IV	Supplemental		829	Ovarian cancer stages I & II vs Endometrial Cancer Stages I & II	Supplemental
1328	Endometrial Cancer Stages I, II, IIIC & IV vs Benign Gynecology	1C & 1D		1431	Endometrial Cancer Stages I & II vs Endometrial Cancer Stages IIIC & IV	2C		1309	Endometrial Cancer Stages IIIC & IV vs Benign Gynecology	2B		1328	Endometrial Cancer Stages I & II vs Benign Gynecology	2A		658	Endometrial Cancer Stages I, II, IIIC & IV vs Ovarian Cancer Stages I, II, III & IV	2D		1131	Ovarian cancer stages III & IV vs Endometrial Cancer Stages III & IV	Supplemental		834	Ovarian cancer stages I & II vs Endometrial Cancer Stages I & II	Supplemental
1332	Endometrial Cancer Stages I, II, IIIC & IV vs Benign Gynecology	1C & 1D		1447	Endometrial Cancer Stages I & II vs Endometrial Cancer Stages IIIC & IV	2C		1312	Endometrial Cancer Stages IIIC & IV vs Benign Gynecology	2B		1359	Endometrial Cancer Stages I & II vs Benign Gynecology	2A		670	Endometrial Cancer Stages I, II, IIIC & IV vs Ovarian Cancer Stages I, II, III & IV	2D		1158	Ovarian cancer stages III & IV vs Endometrial Cancer Stages III & IV	Supplemental		836	Ovarian cancer stages I & II vs Endometrial Cancer Stages I & II	Supplemental
1350	Endometrial Cancer Stages I, II, IIIC & IV vs Benign Gynecology	1C & 1D		1483	Endometrial Cancer Stages I & II vs Endometrial Cancer Stages IIIC & IV	2C		1316	Endometrial Cancer Stages IIIC & IV vs Benign Gynecology	2B		1376	Endometrial Cancer Stages I & II vs Benign Gynecology	2A		677	Endometrial Cancer Stages I, II, IIIC & IV vs Ovarian Cancer Stages I, II, III & IV	2D		1187	Ovarian cancer stages III & IV vs Endometrial Cancer Stages III & IV	Supplemental		841	Ovarian cancer stages I & II vs Endometrial Cancer Stages I & II	Supplemental
1354	Endometrial Cancer Stages I, II, IIIC & IV vs Benign Gynecology	1C & 1D		1498	Endometrial Cancer Stages I & II vs Endometrial Cancer Stages IIIC & IV	2C		1323	Endometrial Cancer Stages IIIC & IV vs Benign Gynecology	2B		1388	Endometrial Cancer Stages I & II vs Benign Gynecology	2A		678	Endometrial Cancer Stages I, II, IIIC & IV vs Ovarian Cancer Stages I, II, III & IV	2D		1190	Ovarian cancer stages III & IV vs Endometrial Cancer Stages III & IV	Supplemental		852	Ovarian cancer stages I & II vs Endometrial Cancer Stages I & II	Supplemental
1359	Endometrial Cancer Stages I, II, IIIC & IV vs Benign Gynecology	1C & 1D		1499	Endometrial Cancer Stages I & II vs Endometrial Cancer Stages IIIC & IV	2C		1340	Endometrial Cancer Stages IIIC & IV vs Benign Gynecology	2B		1421	Endometrial Cancer Stages I & II vs Benign Gynecology	2A		679	Endometrial Cancer Stages I, II, IIIC & IV vs Ovarian Cancer Stages I, II, III & IV	2D		1193	Ovarian cancer stages III & IV vs Endometrial Cancer Stages III & IV	Supplemental		854	Ovarian cancer stages I & II vs Endometrial Cancer Stages I & II	Supplemental
1373	Endometrial Cancer Stages I, II, IIIC & IV vs Benign Gynecology	1C & 1D		1508	Endometrial Cancer Stages I & II vs Endometrial Cancer Stages IIIC & IV	2C		1349	Endometrial Cancer Stages IIIC & IV vs Benign Gynecology	2B		1453	Endometrial Cancer Stages I & II vs Benign Gynecology	2A		680	Endometrial Cancer Stages I, II, IIIC & IV vs Ovarian Cancer Stages I, II, III & IV	2D		1200	Ovarian cancer stages III & IV vs Endometrial Cancer Stages III & IV	Supplemental		865	Ovarian cancer stages I & II vs Endometrial Cancer Stages I & II	Supplemental
1376	Endometrial Cancer Stages I, II, IIIC & IV vs Benign Gynecology	1C & 1D		1517	Endometrial Cancer Stages I & II vs Endometrial Cancer Stages IIIC & IV	2C		1350	Endometrial Cancer Stages IIIC & IV vs Benign Gynecology	2B		1478	Endometrial Cancer Stages I & II vs Benign Gynecology	2A		681	Endometrial Cancer Stages I, II, IIIC & IV vs Ovarian Cancer Stages I, II, III & IV	2D		1209	Ovarian cancer stages III & IV vs Endometrial Cancer Stages III & IV	Supplemental		878	Ovarian cancer stages I & II vs Endometrial Cancer Stages I & II	Supplemental
1422	Endometrial Cancer Stages I, II, IIIC & IV vs Benign Gynecology	1C & 1D		1526	Endometrial Cancer Stages I & II vs Endometrial Cancer Stages IIIC & IV	2C		1360	Endometrial Cancer Stages IIIC & IV vs Benign Gynecology	2B		1492	Endometrial Cancer Stages I & II vs Benign Gynecology	2A		682	Endometrial Cancer Stages I, II, IIIC & IV vs Ovarian Cancer Stages I, II, III & IV	2D		1232	Ovarian cancer stages III & IV vs Endometrial Cancer Stages III & IV	Supplemental		879	Ovarian cancer stages I & II vs Endometrial Cancer Stages I & II	Supplemental
1438	Endometrial Cancer Stages I, II, IIIC & IV vs Benign Gynecology	1C & 1D		1563	Endometrial Cancer Stages I & II vs Endometrial Cancer Stages IIIC & IV	2C		1373	Endometrial Cancer Stages IIIC & IV vs Benign Gynecology	2B		1498	Endometrial Cancer Stages I & II vs Benign Gynecology	2A		683	Endometrial Cancer Stages I, II, IIIC & IV vs Ovarian Cancer Stages I, II, III & IV	2D		1237	Ovarian cancer stages III & IV vs Endometrial Cancer Stages III & IV	Supplemental		886	Ovarian cancer stages I & II vs Endometrial Cancer Stages I & II	Supplemental
1478	Endometrial Cancer Stages I, II, IIIC & IV vs Benign Gynecology	1C & 1D		1569	Endometrial Cancer Stages I & II vs Endometrial Cancer Stages IIIC & IV	2C		1376	Endometrial Cancer Stages IIIC & IV vs Benign Gynecology	2B		1511	Endometrial Cancer Stages I & II vs Benign Gynecology	2A		685	Endometrial Cancer Stages I, II, IIIC & IV vs Ovarian Cancer Stages I, II, III & IV	2D		1257	Ovarian cancer stages III & IV vs Endometrial Cancer Stages III & IV	Supplemental		889	Ovarian cancer stages I & II vs Endometrial Cancer Stages I & II	Supplemental
1485	Endometrial Cancer Stages I, II, IIIC & IV vs Benign Gynecology	1C & 1D		1586	Endometrial Cancer Stages I & II vs Endometrial Cancer Stages IIIC & IV	2C		1391	Endometrial Cancer Stages IIIC & IV vs Benign Gynecology	2B		1517	Endometrial Cancer Stages I & II vs Benign Gynecology	2A		687	Endometrial Cancer Stages I, II, IIIC & IV vs Ovarian Cancer Stages I, II, III & IV	2D		1258	Ovarian cancer stages III & IV vs Endometrial Cancer Stages III & IV	Supplemental		896	Ovarian cancer stages I & II vs Endometrial Cancer Stages I & II	Supplemental
1492	Endometrial Cancer Stages I, II, IIIC & IV vs Benign Gynecology	1C & 1D		1588	Endometrial Cancer Stages I & II vs Endometrial Cancer Stages IIIC & IV	2C		1392	Endometrial Cancer Stages IIIC & IV vs Benign Gynecology	2B		1565	Endometrial Cancer Stages I & II vs Benign Gynecology	2A		689	Endometrial Cancer Stages I, II, IIIC & IV vs Ovarian Cancer Stages I, II, III & IV	2D		1279	Ovarian cancer stages III & IV vs Endometrial Cancer Stages III & IV	Supplemental		907	Ovarian cancer stages I & II vs Endometrial Cancer Stages I & II	Supplemental
1511	Endometrial Cancer Stages I, II, IIIC & IV vs Benign Gynecology	1C & 1D		1601	Endometrial Cancer Stages I & II vs Endometrial Cancer Stages IIIC & IV	2C		1396	Endometrial Cancer Stages IIIC & IV vs Benign Gynecology	2B		1567	Endometrial Cancer Stages I & II vs Benign Gynecology	2A		701	Endometrial Cancer Stages I, II, IIIC & IV vs Ovarian Cancer Stages I, II, III & IV	2D		1282	Ovarian cancer stages III & IV vs Endometrial Cancer Stages III & IV	Supplemental		919	Ovarian cancer stages I & II vs Endometrial Cancer Stages I & II	Supplemental
1555	Endometrial Cancer Stages I, II, IIIC & IV vs Benign Gynecology	1C & 1D		1603	Endometrial Cancer Stages I & II vs Endometrial Cancer Stages IIIC & IV	2C		1438	Endometrial Cancer Stages IIIC & IV vs Benign Gynecology	2B		1568	Endometrial Cancer Stages I & II vs Benign Gynecology	2A		703	Endometrial Cancer Stages I, II, IIIC & IV vs Ovarian Cancer Stages I, II, III & IV	2D		1297	Ovarian cancer stages III & IV vs Endometrial Cancer Stages III & IV	Supplemental		937	Ovarian cancer stages I & II vs Endometrial Cancer Stages I & II	Supplemental
1559	Endometrial Cancer Stages I, II, IIIC & IV vs Benign Gynecology	1C & 1D		1613	Endometrial Cancer Stages I & II vs Endometrial Cancer Stages IIIC & IV	2C		1447	Endometrial Cancer Stages IIIC & IV vs Benign Gynecology	2B		1586	Endometrial Cancer Stages I & II vs Benign Gynecology	2A		704	Endometrial Cancer Stages I, II, IIIC & IV vs Ovarian Cancer Stages I, II, III & IV	2D		1508	Ovarian cancer stages III & IV vs Endometrial Cancer Stages III & IV	Supplemental		943	Ovarian cancer stages I & II vs Endometrial Cancer Stages I & II	Supplemental
1567	Endometrial Cancer Stages I, II, IIIC & IV vs Benign Gynecology	1C & 1D		1622	Endometrial Cancer Stages I & II vs Endometrial Cancer Stages IIIC & IV	2C		1478	Endometrial Cancer Stages IIIC & IV vs Benign Gynecology	2B		1601	Endometrial Cancer Stages I & II vs Benign Gynecology	2A		708	Endometrial Cancer Stages I, II, IIIC & IV vs Ovarian Cancer Stages I, II, III & IV	2D		1517	Ovarian cancer stages III & IV vs Endometrial Cancer Stages III & IV	Supplemental		949	Ovarian cancer stages I & II vs Endometrial Cancer Stages I & II	Supplemental
1568	Endometrial Cancer Stages I, II, IIIC & IV vs Benign Gynecology	1C & 1D		1624	Endometrial Cancer Stages I & II vs Endometrial Cancer Stages IIIC & IV	2C		1485	Endometrial Cancer Stages IIIC & IV vs Benign Gynecology	2B		1603	Endometrial Cancer Stages I & II vs Benign Gynecology	2A		713	Endometrial Cancer Stages I, II, IIIC & IV vs Ovarian Cancer Stages I, II, III & IV	2D		1522	Ovarian cancer stages III & IV vs Endometrial Cancer Stages III & IV	Supplemental		953	Ovarian cancer stages I & II vs Endometrial Cancer Stages I & II	Supplemental
1603	Endometrial Cancer Stages I, II, IIIC & IV vs Benign Gynecology	1C & 1D		1654	Endometrial Cancer Stages I & II vs Endometrial Cancer Stages IIIC & IV	2C		1489	Endometrial Cancer Stages IIIC & IV vs Benign Gynecology	2B		1618	Endometrial Cancer Stages I & II vs Benign Gynecology	2A		719	Endometrial Cancer Stages I, II, IIIC & IV vs Ovarian Cancer Stages I, II, III & IV	2D		1546	Ovarian cancer stages III & IV vs Endometrial Cancer Stages III & IV	Supplemental		957	Ovarian cancer stages I & II vs Endometrial Cancer Stages I & II	Supplemental
1626	Endometrial Cancer Stages I, II, IIIC & IV vs Benign Gynecology	1C & 1D		1656	Endometrial Cancer Stages I & II vs Endometrial Cancer Stages IIIC & IV	2C		1499	Endometrial Cancer Stages IIIC & IV vs Benign Gynecology	2B		1632	Endometrial Cancer Stages I & II vs Benign Gynecology	2A		721	Endometrial Cancer Stages I, II, IIIC & IV vs Ovarian Cancer Stages I, II, III & IV	2D		1583	Ovarian cancer stages III & IV vs Endometrial Cancer Stages III & IV	Supplemental		962	Ovarian cancer stages I & II vs Endometrial Cancer Stages I & II	Supplemental
1661	Endometrial Cancer Stages I, II, IIIC & IV vs Benign Gynecology	1C & 1D		1657	Endometrial Cancer Stages I & II vs Endometrial Cancer Stages IIIC & IV	2C		1508	Endometrial Cancer Stages IIIC & IV vs Benign Gynecology	2B		1661	Endometrial Cancer Stages I & II vs Benign Gynecology	2A		722	Endometrial Cancer Stages I, II, IIIC & IV vs Ovarian Cancer Stages I, II, III & IV	2D		1586	Ovarian cancer stages III & IV vs Endometrial Cancer Stages III & IV	Supplemental		968	Ovarian cancer stages I & II vs Endometrial Cancer Stages I & II	Supplemental
1667	Endometrial Cancer Stages I, II, IIIC & IV vs Benign Gynecology	1C & 1D		1665	Endometrial Cancer Stages I & II vs Endometrial Cancer Stages IIIC & IV	2C		1513	Endometrial Cancer Stages IIIC & IV vs Benign Gynecology	2B		1667	Endometrial Cancer Stages I & II vs Benign Gynecology	2A		729	Endometrial Cancer Stages I, II, IIIC & IV vs Ovarian Cancer Stages I, II, III & IV	2D		1588	Ovarian cancer stages III & IV vs Endometrial Cancer Stages III & IV	Supplemental		969	Ovarian cancer stages I & II vs Endometrial Cancer Stages I & II	Supplemental
1672	Endometrial Cancer Stages I, II, IIIC & IV vs Benign Gynecology	1C & 1D		1680	Endometrial Cancer Stages I & II vs Endometrial Cancer Stages IIIC & IV	2C		1542	Endometrial Cancer Stages IIIC & IV vs Benign Gynecology	2B		1672	Endometrial Cancer Stages I & II vs Benign Gynecology	2A		731	Endometrial Cancer Stages I, II, IIIC & IV vs Ovarian Cancer Stages I, II, III & IV	2D		1622	Ovarian cancer stages III & IV vs Endometrial Cancer Stages III & IV	Supplemental		970	Ovarian cancer stages I & II vs Endometrial Cancer Stages I & II	Supplemental
1706	Endometrial Cancer Stages I, II, IIIC & IV vs Benign Gynecology	1C & 1D		1681	Endometrial Cancer Stages I & II vs Endometrial Cancer Stages IIIC & IV	2C		1547	Endometrial Cancer Stages IIIC & IV vs Benign Gynecology	2B		1706	Endometrial Cancer Stages I & II vs Benign Gynecology	2A		736	Endometrial Cancer Stages I, II, IIIC & IV vs Ovarian Cancer Stages I, II, III & IV	2D		1628	Ovarian cancer stages III & IV vs Endometrial Cancer Stages III & IV	Supplemental		971	Ovarian cancer stages I & II vs Endometrial Cancer Stages I & II	Supplemental
1718	Endometrial Cancer Stages I, II, IIIC & IV vs Benign Gynecology	1C & 1D		1684	Endometrial Cancer Stages I & II vs Endometrial Cancer Stages IIIC & IV	2C		1555	Endometrial Cancer Stages IIIC & IV vs Benign Gynecology	2B		1718	Endometrial Cancer Stages I & II vs Benign Gynecology	2A		738	Endometrial Cancer Stages I, II, IIIC & IV vs Ovarian Cancer Stages I, II, III & IV	2D		1662	Ovarian cancer stages III & IV vs Endometrial Cancer Stages III & IV	Supplemental		985	Ovarian cancer stages I & II vs Endometrial Cancer Stages I & II	Supplemental
1726	Endometrial Cancer Stages I, II, IIIC & IV vs Benign Gynecology	1C & 1D		1726	Endometrial Cancer Stages I & II vs Endometrial Cancer Stages IIIC & IV	2C		1559	Endometrial Cancer Stages IIIC & IV vs Benign Gynecology	2B		1726	Endometrial Cancer Stages I & II vs Benign Gynecology	2A		739	Endometrial Cancer Stages I, II, IIIC & IV vs Ovarian Cancer Stages I, II, III & IV	2D		1670	Ovarian cancer stages III & IV vs Endometrial Cancer Stages III & IV	Supplemental		997	Ovarian cancer stages I & II vs Endometrial Cancer Stages I & II	Supplemental
1727	Endometrial Cancer Stages I, II, IIIC & IV vs Benign Gynecology	1C & 1D		1741	Endometrial Cancer Stages I & II vs Endometrial Cancer Stages IIIC & IV	2C		1567	Endometrial Cancer Stages IIIC & IV vs Benign Gynecology	2B		1727	Endometrial Cancer Stages I & II vs Benign Gynecology	2A		740	Endometrial Cancer Stages I, II, IIIC & IV vs Ovarian Cancer Stages I, II, III & IV	2D		1680	Ovarian cancer stages III & IV vs Endometrial Cancer Stages III & IV	Supplemental		999	Ovarian cancer stages I & II vs Endometrial Cancer Stages I & II	Supplemental
1730	Endometrial Cancer Stages I, II, IIIC & IV vs Benign Gynecology	1C & 1D		1755	Endometrial Cancer Stages I & II vs Endometrial Cancer Stages IIIC & IV	2C		1568	Endometrial Cancer Stages IIIC & IV vs Benign Gynecology	2B		1730	Endometrial Cancer Stages I & II vs Benign Gynecology	2A		741	Endometrial Cancer Stages I, II, IIIC & IV vs Ovarian Cancer Stages I, II, III & IV	2D		1690	Ovarian cancer stages III & IV vs Endometrial Cancer Stages III & IV	Supplemental		1004	Ovarian cancer stages I & II vs Endometrial Cancer Stages I & II	Supplemental
1784	Endometrial Cancer Stages I, II, IIIC & IV vs Benign Gynecology	1C & 1D		1758	Endometrial Cancer Stages I & II vs Endometrial Cancer Stages IIIC & IV	2C		1569	Endometrial Cancer Stages IIIC & IV vs Benign Gynecology	2B		1751	Endometrial Cancer Stages I & II vs Benign Gynecology	2A		751	Endometrial Cancer Stages I, II, IIIC & IV vs Ovarian Cancer Stages I, II, III & IV	2D		1757	Ovarian cancer stages III & IV vs Endometrial Cancer Stages III & IV	Supplemental		1032	Ovarian cancer stages I & II vs Endometrial Cancer Stages I & II	Supplemental
1793	Endometrial Cancer Stages I, II, IIIC & IV vs Benign Gynecology	1C & 1D		1773	Endometrial Cancer Stages I & II vs Endometrial Cancer Stages IIIC & IV	2C		1574	Endometrial Cancer Stages IIIC & IV vs Benign Gynecology	2B		1758	Endometrial Cancer Stages I & II vs Benign Gynecology	2A		755	Endometrial Cancer Stages I, II, IIIC & IV vs Ovarian Cancer Stages I, II, III & IV	2D		1797	Ovarian cancer stages III & IV vs Endometrial Cancer Stages III & IV	Supplemental		1041	Ovarian cancer stages I & II vs Endometrial Cancer Stages I & II	Supplemental
1795	Endometrial Cancer Stages I, II, IIIC & IV vs Benign Gynecology	1C & 1D		1775	Endometrial Cancer Stages I & II vs Endometrial Cancer Stages IIIC & IV	2C		1581	Endometrial Cancer Stages IIIC & IV vs Benign Gynecology	2B		1793	Endometrial Cancer Stages I & II vs Benign Gynecology	2A		759	Endometrial Cancer Stages I, II, IIIC & IV vs Ovarian Cancer Stages I, II, III & IV	2D		1853	Ovarian cancer stages III & IV vs Endometrial Cancer Stages III & IV	Supplemental		1042	Ovarian cancer stages I & II vs Endometrial Cancer Stages I & II	Supplemental
								1588	Endometrial Cancer Stages IIIC & IV vs Benign Gynecology	2B		1805	Endometrial Cancer Stages I & II vs Benign Gynecology	2A		761	Endometrial Cancer Stages I, II, IIIC & IV vs Ovarian Cancer Stages I, II, III & IV	2D		1854	Ovarian cancer stages III & IV vs Endometrial Cancer Stages III & IV	Supplemental		1065	Ovarian cancer stages I & II vs Endometrial Cancer Stages I & II	Supplemental
								1606	Endometrial Cancer Stages IIIC & IV vs Benign Gynecology	2B		1810	Endometrial Cancer Stages I & II vs Benign Gynecology	2A		763	Endometrial Cancer Stages I, II, IIIC & IV vs Ovarian Cancer Stages I, II, III & IV	2D		1855	Ovarian cancer stages III & IV vs Endometrial Cancer Stages III & IV	Supplemental		1073	Ovarian cancer stages I & II vs Endometrial Cancer Stages I & II	Supplemental
								1624	Endometrial Cancer Stages IIIC & IV vs Benign Gynecology	2B		1829	Endometrial Cancer Stages I & II vs Benign Gynecology	2A		781	Endometrial Cancer Stages I, II, IIIC & IV vs Ovarian Cancer Stages I, II, III & IV	2D		1899	Ovarian cancer stages III & IV vs Endometrial Cancer Stages III & IV	Supplemental		1077	Ovarian cancer stages I & II vs Endometrial Cancer Stages I & II	Supplemental
								1626	Endometrial Cancer Stages IIIC & IV vs Benign Gynecology	2B		1838	Endometrial Cancer Stages I & II vs Benign Gynecology	2A		782	Endometrial Cancer Stages I, II, IIIC & IV vs Ovarian Cancer Stages I, II, III & IV	2D		1901	Ovarian cancer stages III & IV vs Endometrial Cancer Stages III & IV	Supplemental		1078	Ovarian cancer stages I & II vs Endometrial Cancer Stages I & II	Supplemental
								1680	Endometrial Cancer Stages IIIC & IV vs Benign Gynecology	2B		1870	Endometrial Cancer Stages I & II vs Benign Gynecology	2A		793	Endometrial Cancer Stages I, II, IIIC & IV vs Ovarian Cancer Stages I, II, III & IV	2D		1913	Ovarian cancer stages III & IV vs Endometrial Cancer Stages III & IV	Supplemental		1080	Ovarian cancer stages I & II vs Endometrial Cancer Stages I & II	Supplemental
								1698	Endometrial Cancer Stages IIIC & IV vs Benign Gynecology	2B		1882	Endometrial Cancer Stages I & II vs Benign Gynecology	2A		795	Endometrial Cancer Stages I, II, IIIC & IV vs Ovarian Cancer Stages I, II, III & IV	2D		1943	Ovarian cancer stages III & IV vs Endometrial Cancer Stages III & IV	Supplemental		1081	Ovarian cancer stages I & II vs Endometrial Cancer Stages I & II	Supplemental
								1706	Endometrial Cancer Stages IIIC & IV vs Benign Gynecology	2B		1890	Endometrial Cancer Stages I & II vs Benign Gynecology	2A		796	Endometrial Cancer Stages I, II, IIIC & IV vs Ovarian Cancer Stages I, II, III & IV	2D						1082	Ovarian cancer stages I & II vs Endometrial Cancer Stages I & II	Supplemental
								1712	Endometrial Cancer Stages IIIC & IV vs Benign Gynecology	2B		1912	Endometrial Cancer Stages I & II vs Benign Gynecology	2A		797	Endometrial Cancer Stages I, II, IIIC & IV vs Ovarian Cancer Stages I, II, III & IV	2D						1088	Ovarian cancer stages I & II vs Endometrial Cancer Stages I & II	Supplemental
								1718	Endometrial Cancer Stages IIIC & IV vs Benign Gynecology	2B		1918	Endometrial Cancer Stages I & II vs Benign Gynecology	2A		798	Endometrial Cancer Stages I, II, IIIC & IV vs Ovarian Cancer Stages I, II, III & IV	2D						1090	Ovarian cancer stages I & II vs Endometrial Cancer Stages I & II	Supplemental
								1727	Endometrial Cancer Stages IIIC & IV vs Benign Gynecology	2B		1921	Endometrial Cancer Stages I & II vs Benign Gynecology	2A		799	Endometrial Cancer Stages I, II, IIIC & IV vs Ovarian Cancer Stages I, II, III & IV	2D						1096	Ovarian cancer stages I & II vs Endometrial Cancer Stages I & II	Supplemental
								1737	Endometrial Cancer Stages IIIC & IV vs Benign Gynecology	2B		1922	Endometrial Cancer Stages I & II vs Benign Gynecology	2A		802	Endometrial Cancer Stages I, II, IIIC & IV vs Ovarian Cancer Stages I, II, III & IV	2D						1103	Ovarian cancer stages I & II vs Endometrial Cancer Stages I & II	Supplemental
								1784	Endometrial Cancer Stages IIIC & IV vs Benign Gynecology	2B		1925	Endometrial Cancer Stages I & II vs Benign Gynecology	2A		803	Endometrial Cancer Stages I, II, IIIC & IV vs Ovarian Cancer Stages I, II, III & IV	2D						1106	Ovarian cancer stages I & II vs Endometrial Cancer Stages I & II	Supplemental
								1792	Endometrial Cancer Stages IIIC & IV vs Benign Gynecology	2B		1928	Endometrial Cancer Stages I & II vs Benign Gynecology	2A		804	Endometrial Cancer Stages I, II, IIIC & IV vs Ovarian Cancer Stages I, II, III & IV	2D						1107	Ovarian cancer stages I & II vs Endometrial Cancer Stages I & II	Supplemental
								1793	Endometrial Cancer Stages IIIC & IV vs Benign Gynecology	2B		1937	Endometrial Cancer Stages I & II vs Benign Gynecology	2A		818	Endometrial Cancer Stages I, II, IIIC & IV vs Ovarian Cancer Stages I, II, III & IV	2D						1109	Ovarian cancer stages I & II vs Endometrial Cancer Stages I & II	Supplemental
								1795	Endometrial Cancer Stages IIIC & IV vs Benign Gynecology	2B		1938	Endometrial Cancer Stages I & II vs Benign Gynecology	2A		819	Endometrial Cancer Stages I, II, IIIC & IV vs Ovarian Cancer Stages I, II, III & IV	2D						1112	Ovarian cancer stages I & II vs Endometrial Cancer Stages I & II	Supplemental
								1804	Endometrial Cancer Stages IIIC & IV vs Benign Gynecology	2B		1940	Endometrial Cancer Stages I & II vs Benign Gynecology	2A		821	Endometrial Cancer Stages I, II, IIIC & IV vs Ovarian Cancer Stages I, II, III & IV	2D						1118	Ovarian cancer stages I & II vs Endometrial Cancer Stages I & II	Supplemental
								1835	Endometrial Cancer Stages IIIC & IV vs Benign Gynecology	2B		1965	Endometrial Cancer Stages I & II vs Benign Gynecology	2A		826	Endometrial Cancer Stages I, II, IIIC & IV vs Ovarian Cancer Stages I, II, III & IV	2D						1120	Ovarian cancer stages I & II vs Endometrial Cancer Stages I & II	Supplemental
								1854	Endometrial Cancer Stages IIIC & IV vs Benign Gynecology	2B		1979	Endometrial Cancer Stages I & II vs Benign Gynecology	2A		827	Endometrial Cancer Stages I, II, IIIC & IV vs Ovarian Cancer Stages I, II, III & IV	2D						1122	Ovarian cancer stages I & II vs Endometrial Cancer Stages I & II	Supplemental
								1864	Endometrial Cancer Stages IIIC & IV vs Benign Gynecology	2B		1991	Endometrial Cancer Stages I & II vs Benign Gynecology	2A		828	Endometrial Cancer Stages I, II, IIIC & IV vs Ovarian Cancer Stages I, II, III & IV	2D						1124	Ovarian cancer stages I & II vs Endometrial Cancer Stages I & II	Supplemental
								1882	Endometrial Cancer Stages IIIC & IV vs Benign Gynecology	2B		1993	Endometrial Cancer Stages I & II vs Benign Gynecology	2A		829	Endometrial Cancer Stages I, II, IIIC & IV vs Ovarian Cancer Stages I, II, III & IV	2D						1125	Ovarian cancer stages I & II vs Endometrial Cancer Stages I & II	Supplemental
								1896	Endometrial Cancer Stages IIIC & IV vs Benign Gynecology	2B		1994	Endometrial Cancer Stages I & II vs Benign Gynecology	2A		834	Endometrial Cancer Stages I, II, IIIC & IV vs Ovarian Cancer Stages I, II, III & IV	2D						1127	Ovarian cancer stages I & II vs Endometrial Cancer Stages I & II	Supplemental
								1897	Endometrial Cancer Stages IIIC & IV vs Benign Gynecology	2B						836	Endometrial Cancer Stages I, II, IIIC & IV vs Ovarian Cancer Stages I, II, III & IV	2D						1128	Ovarian cancer stages I & II vs Endometrial Cancer Stages I & II	Supplemental
								1901	Endometrial Cancer Stages IIIC & IV vs Benign Gynecology	2B						837	Endometrial Cancer Stages I, II, IIIC & IV vs Ovarian Cancer Stages I, II, III & IV	2D						1148	Ovarian cancer stages I & II vs Endometrial Cancer Stages I & II	Supplemental
								1922	Endometrial Cancer Stages IIIC & IV vs Benign Gynecology	2B						839	Endometrial Cancer Stages I, II, IIIC & IV vs Ovarian Cancer Stages I, II, III & IV	2D						1149	Ovarian cancer stages I & II vs Endometrial Cancer Stages I & II	Supplemental
								1937	Endometrial Cancer Stages IIIC & IV vs Benign Gynecology	2B						841	Endometrial Cancer Stages I, II, IIIC & IV vs Ovarian Cancer Stages I, II, III & IV	2D						1151	Ovarian cancer stages I & II vs Endometrial Cancer Stages I & II	Supplemental
								1938	Endometrial Cancer Stages IIIC & IV vs Benign Gynecology	2B						842	Endometrial Cancer Stages I, II, IIIC & IV vs Ovarian Cancer Stages I, II, III & IV	2D						1152	Ovarian cancer stages I & II vs Endometrial Cancer Stages I & II	Supplemental
								1939	Endometrial Cancer Stages IIIC & IV vs Benign Gynecology	2B						848	Endometrial Cancer Stages I, II, IIIC & IV vs Ovarian Cancer Stages I, II, III & IV	2D						1155	Ovarian cancer stages I & II vs Endometrial Cancer Stages I & II	Supplemental
								1942	Endometrial Cancer Stages IIIC & IV vs Benign Gynecology	2B						849	Endometrial Cancer Stages I, II, IIIC & IV vs Ovarian Cancer Stages I, II, III & IV	2D						1162	Ovarian cancer stages I & II vs Endometrial Cancer Stages I & II	Supplemental
								1943	Endometrial Cancer Stages IIIC & IV vs Benign Gynecology	2B						852	Endometrial Cancer Stages I, II, IIIC & IV vs Ovarian Cancer Stages I, II, III & IV	2D						1167	Ovarian cancer stages I & II vs Endometrial Cancer Stages I & II	Supplemental
								1961	Endometrial Cancer Stages IIIC & IV vs Benign Gynecology	2B						854	Endometrial Cancer Stages I, II, IIIC & IV vs Ovarian Cancer Stages I, II, III & IV	2D						1168	Ovarian cancer stages I & II vs Endometrial Cancer Stages I & II	Supplemental
								1964	Endometrial Cancer Stages IIIC & IV vs Benign Gynecology	2B						858	Endometrial Cancer Stages I, II, IIIC & IV vs Ovarian Cancer Stages I, II, III & IV	2D						1169	Ovarian cancer stages I & II vs Endometrial Cancer Stages I & II	Supplemental
								1967	Endometrial Cancer Stages IIIC & IV vs Benign Gynecology	2B						865	Endometrial Cancer Stages I, II, IIIC & IV vs Ovarian Cancer Stages I, II, III & IV	2D						1173	Ovarian cancer stages I & II vs Endometrial Cancer Stages I & II	Supplemental
								1973	Endometrial Cancer Stages IIIC & IV vs Benign Gynecology	2B						869	Endometrial Cancer Stages I, II, IIIC & IV vs Ovarian Cancer Stages I, II, III & IV	2D						1180	Ovarian cancer stages I & II vs Endometrial Cancer Stages I & II	Supplemental
								1975	Endometrial Cancer Stages IIIC & IV vs Benign Gynecology	2B						874	Endometrial Cancer Stages I, II, IIIC & IV vs Ovarian Cancer Stages I, II, III & IV	2D						1181	Ovarian cancer stages I & II vs Endometrial Cancer Stages I & II	Supplemental
								1984	Endometrial Cancer Stages IIIC & IV vs Benign Gynecology	2B						878	Endometrial Cancer Stages I, II, IIIC & IV vs Ovarian Cancer Stages I, II, III & IV	2D						1188	Ovarian cancer stages I & II vs Endometrial Cancer Stages I & II	Supplemental
																879	Endometrial Cancer Stages I, II, IIIC & IV vs Ovarian Cancer Stages I, II, III & IV	2D						1191	Ovarian cancer stages I & II vs Endometrial Cancer Stages I & II	Supplemental
																886	Endometrial Cancer Stages I, II, IIIC & IV vs Ovarian Cancer Stages I, II, III & IV	2D						1200	Ovarian cancer stages I & II vs Endometrial Cancer Stages I & II	Supplemental
																896	Endometrial Cancer Stages I, II, IIIC & IV vs Ovarian Cancer Stages I, II, III & IV	2D						1203	Ovarian cancer stages I & II vs Endometrial Cancer Stages I & II	Supplemental
																901	Endometrial Cancer Stages I, II, IIIC & IV vs Ovarian Cancer Stages I, II, III & IV	2D						1204	Ovarian cancer stages I & II vs Endometrial Cancer Stages I & II	Supplemental
																906	Endometrial Cancer Stages I, II, IIIC & IV vs Ovarian Cancer Stages I, II, III & IV	2D						1205	Ovarian cancer stages I & II vs Endometrial Cancer Stages I & II	Supplemental
																907	Endometrial Cancer Stages I, II, IIIC & IV vs Ovarian Cancer Stages I, II, III & IV	2D						1206	Ovarian cancer stages I & II vs Endometrial Cancer Stages I & II	Supplemental
																908	Endometrial Cancer Stages I, II, IIIC & IV vs Ovarian Cancer Stages I, II, III & IV	2D						1209	Ovarian cancer stages I & II vs Endometrial Cancer Stages I & II	Supplemental
																919	Endometrial Cancer Stages I, II, IIIC & IV vs Ovarian Cancer Stages I, II, III & IV	2D						1210	Ovarian cancer stages I & II vs Endometrial Cancer Stages I & II	Supplemental
																937	Endometrial Cancer Stages I, II, IIIC & IV vs Ovarian Cancer Stages I, II, III & IV	2D						1221	Ovarian cancer stages I & II vs Endometrial Cancer Stages I & II	Supplemental
																939	Endometrial Cancer Stages I, II, IIIC & IV vs Ovarian Cancer Stages I, II, III & IV	2D						1224	Ovarian cancer stages I & II vs Endometrial Cancer Stages I & II	Supplemental
																940	Endometrial Cancer Stages I, II, IIIC & IV vs Ovarian Cancer Stages I, II, III & IV	2D						1232	Ovarian cancer stages I & II vs Endometrial Cancer Stages I & II	Supplemental
																943	Endometrial Cancer Stages I, II, IIIC & IV vs Ovarian Cancer Stages I, II, III & IV	2D						1234	Ovarian cancer stages I & II vs Endometrial Cancer Stages I & II	Supplemental
																946	Endometrial Cancer Stages I, II, IIIC & IV vs Ovarian Cancer Stages I, II, III & IV	2D						1237	Ovarian cancer stages I & II vs Endometrial Cancer Stages I & II	Supplemental
																949	Endometrial Cancer Stages I, II, IIIC & IV vs Ovarian Cancer Stages I, II, III & IV	2D						1241	Ovarian cancer stages I & II vs Endometrial Cancer Stages I & II	Supplemental
																955	Endometrial Cancer Stages I, II, IIIC & IV vs Ovarian Cancer Stages I, II, III & IV	2D						1257	Ovarian cancer stages I & II vs Endometrial Cancer Stages I & II	Supplemental
																956	Endometrial Cancer Stages I, II, IIIC & IV vs Ovarian Cancer Stages I, II, III & IV	2D						1258	Ovarian cancer stages I & II vs Endometrial Cancer Stages I & II	Supplemental
																962	Endometrial Cancer Stages I, II, IIIC & IV vs Ovarian Cancer Stages I, II, III & IV	2D						1260	Ovarian cancer stages I & II vs Endometrial Cancer Stages I & II	Supplemental
																968	Endometrial Cancer Stages I, II, IIIC & IV vs Ovarian Cancer Stages I, II, III & IV	2D						1264	Ovarian cancer stages I & II vs Endometrial Cancer Stages I & II	Supplemental
																969	Endometrial Cancer Stages I, II, IIIC & IV vs Ovarian Cancer Stages I, II, III & IV	2D						1265	Ovarian cancer stages I & II vs Endometrial Cancer Stages I & II	Supplemental
																970	Endometrial Cancer Stages I, II, IIIC & IV vs Ovarian Cancer Stages I, II, III & IV	2D						1271	Ovarian cancer stages I & II vs Endometrial Cancer Stages I & II	Supplemental
																971	Endometrial Cancer Stages I, II, IIIC & IV vs Ovarian Cancer Stages I, II, III & IV	2D						1272	Ovarian cancer stages I & II vs Endometrial Cancer Stages I & II	Supplemental
																984	Endometrial Cancer Stages I, II, IIIC & IV vs Ovarian Cancer Stages I, II, III & IV	2D						1274	Ovarian cancer stages I & II vs Endometrial Cancer Stages I & II	Supplemental
																1001	Endometrial Cancer Stages I, II, IIIC & IV vs Ovarian Cancer Stages I, II, III & IV	2D						1275	Ovarian cancer stages I & II vs Endometrial Cancer Stages I & II	Supplemental
																1004	Endometrial Cancer Stages I, II, IIIC & IV vs Ovarian Cancer Stages I, II, III & IV	2D						1278	Ovarian cancer stages I & II vs Endometrial Cancer Stages I & II	Supplemental
																1005	Endometrial Cancer Stages I, II, IIIC & IV vs Ovarian Cancer Stages I, II, III & IV	2D						1279	Ovarian cancer stages I & II vs Endometrial Cancer Stages I & II	Supplemental
																1006	Endometrial Cancer Stages I, II, IIIC & IV vs Ovarian Cancer Stages I, II, III & IV	2D						1281	Ovarian cancer stages I & II vs Endometrial Cancer Stages I & II	Supplemental
																1019	Endometrial Cancer Stages I, II, IIIC & IV vs Ovarian Cancer Stages I, II, III & IV	2D						1284	Ovarian cancer stages I & II vs Endometrial Cancer Stages I & II	Supplemental
																1022	Endometrial Cancer Stages I, II, IIIC & IV vs Ovarian Cancer Stages I, II, III & IV	2D						1293	Ovarian cancer stages I & II vs Endometrial Cancer Stages I & II	Supplemental
																1026	Endometrial Cancer Stages I, II, IIIC & IV vs Ovarian Cancer Stages I, II, III & IV	2D						1295	Ovarian cancer stages I & II vs Endometrial Cancer Stages I & II	Supplemental
																1032	Endometrial Cancer Stages I, II, IIIC & IV vs Ovarian Cancer Stages I, II, III & IV	2D						1306	Ovarian cancer stages I & II vs Endometrial Cancer Stages I & II	Supplemental
																1041	Endometrial Cancer Stages I, II, IIIC & IV vs Ovarian Cancer Stages I, II, III & IV	2D						1308	Ovarian cancer stages I & II vs Endometrial Cancer Stages I & II	Supplemental
																1042	Endometrial Cancer Stages I, II, IIIC & IV vs Ovarian Cancer Stages I, II, III & IV	2D						1310	Ovarian cancer stages I & II vs Endometrial Cancer Stages I & II	Supplemental
																1044	Endometrial Cancer Stages I, II, IIIC & IV vs Ovarian Cancer Stages I, II, III & IV	2D						1317	Ovarian cancer stages I & II vs Endometrial Cancer Stages I & II	Supplemental
																1058	Endometrial Cancer Stages I, II, IIIC & IV vs Ovarian Cancer Stages I, II, III & IV	2D						1320	Ovarian cancer stages I & II vs Endometrial Cancer Stages I & II	Supplemental
																1061	Endometrial Cancer Stages I, II, IIIC & IV vs Ovarian Cancer Stages I, II, III & IV	2D						1329	Ovarian cancer stages I & II vs Endometrial Cancer Stages I & II	Supplemental
																1065	Endometrial Cancer Stages I, II, IIIC & IV vs Ovarian Cancer Stages I, II, III & IV	2D						1332	Ovarian cancer stages I & II vs Endometrial Cancer Stages I & II	Supplemental
																1068	Endometrial Cancer Stages I, II, IIIC & IV vs Ovarian Cancer Stages I, II, III & IV	2D						1335	Ovarian cancer stages I & II vs Endometrial Cancer Stages I & II	Supplemental
																1077	Endometrial Cancer Stages I, II, IIIC & IV vs Ovarian Cancer Stages I, II, III & IV	2D						1339	Ovarian cancer stages I & II vs Endometrial Cancer Stages I & II	Supplemental
																1078	Endometrial Cancer Stages I, II, IIIC & IV vs Ovarian Cancer Stages I, II, III & IV	2D						1343	Ovarian cancer stages I & II vs Endometrial Cancer Stages I & II	Supplemental
																1079	Endometrial Cancer Stages I, II, IIIC & IV vs Ovarian Cancer Stages I, II, III & IV	2D						1349	Ovarian cancer stages I & II vs Endometrial Cancer Stages I & II	Supplemental
																1080	Endometrial Cancer Stages I, II, IIIC & IV vs Ovarian Cancer Stages I, II, III & IV	2D						1350	Ovarian cancer stages I & II vs Endometrial Cancer Stages I & II	Supplemental
																1081	Endometrial Cancer Stages I, II, IIIC & IV vs Ovarian Cancer Stages I, II, III & IV	2D						1351	Ovarian cancer stages I & II vs Endometrial Cancer Stages I & II	Supplemental
																1082	Endometrial Cancer Stages I, II, IIIC & IV vs Ovarian Cancer Stages I, II, III & IV	2D						1357	Ovarian cancer stages I & II vs Endometrial Cancer Stages I & II	Supplemental
																1083	Endometrial Cancer Stages I, II, IIIC & IV vs Ovarian Cancer Stages I, II, III & IV	2D						1366	Ovarian cancer stages I & II vs Endometrial Cancer Stages I & II	Supplemental
																1088	Endometrial Cancer Stages I, II, IIIC & IV vs Ovarian Cancer Stages I, II, III & IV	2D						1385	Ovarian cancer stages I & II vs Endometrial Cancer Stages I & II	Supplemental
																1090	Endometrial Cancer Stages I, II, IIIC & IV vs Ovarian Cancer Stages I, II, III & IV	2D						1387	Ovarian cancer stages I & II vs Endometrial Cancer Stages I & II	Supplemental
																1092	Endometrial Cancer Stages I, II, IIIC & IV vs Ovarian Cancer Stages I, II, III & IV	2D						1405	Ovarian cancer stages I & II vs Endometrial Cancer Stages I & II	Supplemental
																1093	Endometrial Cancer Stages I, II, IIIC & IV vs Ovarian Cancer Stages I, II, III & IV	2D						1406	Ovarian cancer stages I & II vs Endometrial Cancer Stages I & II	Supplemental
																1096	Endometrial Cancer Stages I, II, IIIC & IV vs Ovarian Cancer Stages I, II, III & IV	2D						1417	Ovarian cancer stages I & II vs Endometrial Cancer Stages I & II	Supplemental
																1100	Endometrial Cancer Stages I, II, IIIC & IV vs Ovarian Cancer Stages I, II, III & IV	2D						1418	Ovarian cancer stages I & II vs Endometrial Cancer Stages I & II	Supplemental
																1103	Endometrial Cancer Stages I, II, IIIC & IV vs Ovarian Cancer Stages I, II, III & IV	2D						1431	Ovarian cancer stages I & II vs Endometrial Cancer Stages I & II	Supplemental
																1106	Endometrial Cancer Stages I, II, IIIC & IV vs Ovarian Cancer Stages I, II, III & IV	2D						1433	Ovarian cancer stages I & II vs Endometrial Cancer Stages I & II	Supplemental
																1109	Endometrial Cancer Stages I, II, IIIC & IV vs Ovarian Cancer Stages I, II, III & IV	2D						1453	Ovarian cancer stages I & II vs Endometrial Cancer Stages I & II	Supplemental
																1112	Endometrial Cancer Stages I, II, IIIC & IV vs Ovarian Cancer Stages I, II, III & IV	2D						1470	Ovarian cancer stages I & II vs Endometrial Cancer Stages I & II	Supplemental
																1118	Endometrial Cancer Stages I, II, IIIC & IV vs Ovarian Cancer Stages I, II, III & IV	2D						1478	Ovarian cancer stages I & II vs Endometrial Cancer Stages I & II	Supplemental
																1120	Endometrial Cancer Stages I, II, IIIC & IV vs Ovarian Cancer Stages I, II, III & IV	2D						1482	Ovarian cancer stages I & II vs Endometrial Cancer Stages I & II	Supplemental
																1122	Endometrial Cancer Stages I, II, IIIC & IV vs Ovarian Cancer Stages I, II, III & IV	2D						1483	Ovarian cancer stages I & II vs Endometrial Cancer Stages I & II	Supplemental
																1124	Endometrial Cancer Stages I, II, IIIC & IV vs Ovarian Cancer Stages I, II, III & IV	2D						1490	Ovarian cancer stages I & II vs Endometrial Cancer Stages I & II	Supplemental
																1125	Endometrial Cancer Stages I, II, IIIC & IV vs Ovarian Cancer Stages I, II, III & IV	2D						1496	Ovarian cancer stages I & II vs Endometrial Cancer Stages I & II	Supplemental
																1126	Endometrial Cancer Stages I, II, IIIC & IV vs Ovarian Cancer Stages I, II, III & IV	2D						1511	Ovarian cancer stages I & II vs Endometrial Cancer Stages I & II	Supplemental
																1127	Endometrial Cancer Stages I, II, IIIC & IV vs Ovarian Cancer Stages I, II, III & IV	2D						1512	Ovarian cancer stages I & II vs Endometrial Cancer Stages I & II	Supplemental
																1128	Endometrial Cancer Stages I, II, IIIC & IV vs Ovarian Cancer Stages I, II, III & IV	2D						1514	Ovarian cancer stages I & II vs Endometrial Cancer Stages I & II	Supplemental
																1140	Endometrial Cancer Stages I, II, IIIC & IV vs Ovarian Cancer Stages I, II, III & IV	2D						1516	Ovarian cancer stages I & II vs Endometrial Cancer Stages I & II	Supplemental
																1144	Endometrial Cancer Stages I, II, IIIC & IV vs Ovarian Cancer Stages I, II, III & IV	2D						1517	Ovarian cancer stages I & II vs Endometrial Cancer Stages I & II	Supplemental
																1147	Endometrial Cancer Stages I, II, IIIC & IV vs Ovarian Cancer Stages I, II, III & IV	2D						1518	Ovarian cancer stages I & II vs Endometrial Cancer Stages I & II	Supplemental
																1148	Endometrial Cancer Stages I, II, IIIC & IV vs Ovarian Cancer Stages I, II, III & IV	2D						1519	Ovarian cancer stages I & II vs Endometrial Cancer Stages I & II	Supplemental
																1149	Endometrial Cancer Stages I, II, IIIC & IV vs Ovarian Cancer Stages I, II, III & IV	2D						1521	Ovarian cancer stages I & II vs Endometrial Cancer Stages I & II	Supplemental
																1152	Endometrial Cancer Stages I, II, IIIC & IV vs Ovarian Cancer Stages I, II, III & IV	2D						1526	Ovarian cancer stages I & II vs Endometrial Cancer Stages I & II	Supplemental
																1158	Endometrial Cancer Stages I, II, IIIC & IV vs Ovarian Cancer Stages I, II, III & IV	2D						1537	Ovarian cancer stages I & II vs Endometrial Cancer Stages I & II	Supplemental
																1160	Endometrial Cancer Stages I, II, IIIC & IV vs Ovarian Cancer Stages I, II, III & IV	2D						1543	Ovarian cancer stages I & II vs Endometrial Cancer Stages I & II	Supplemental
																1167	Endometrial Cancer Stages I, II, IIIC & IV vs Ovarian Cancer Stages I, II, III & IV	2D						1546	Ovarian cancer stages I & II vs Endometrial Cancer Stages I & II	Supplemental
																1168	Endometrial Cancer Stages I, II, IIIC & IV vs Ovarian Cancer Stages I, II, III & IV	2D						1549	Ovarian cancer stages I & II vs Endometrial Cancer Stages I & II	Supplemental
																1169	Endometrial Cancer Stages I, II, IIIC & IV vs Ovarian Cancer Stages I, II, III & IV	2D						1552	Ovarian cancer stages I & II vs Endometrial Cancer Stages I & II	Supplemental
																1173	Endometrial Cancer Stages I, II, IIIC & IV vs Ovarian Cancer Stages I, II, III & IV	2D						1557	Ovarian cancer stages I & II vs Endometrial Cancer Stages I & II	Supplemental
																1180	Endometrial Cancer Stages I, II, IIIC & IV vs Ovarian Cancer Stages I, II, III & IV	2D						1563	Ovarian cancer stages I & II vs Endometrial Cancer Stages I & II	Supplemental
																1181	Endometrial Cancer Stages I, II, IIIC & IV vs Ovarian Cancer Stages I, II, III & IV	2D						1583	Ovarian cancer stages I & II vs Endometrial Cancer Stages I & II	Supplemental
																1188	Endometrial Cancer Stages I, II, IIIC & IV vs Ovarian Cancer Stages I, II, III & IV	2D						1588	Ovarian cancer stages I & II vs Endometrial Cancer Stages I & II	Supplemental
																1191	Endometrial Cancer Stages I, II, IIIC & IV vs Ovarian Cancer Stages I, II, III & IV	2D						1589	Ovarian cancer stages I & II vs Endometrial Cancer Stages I & II	Supplemental
																1192	Endometrial Cancer Stages I, II, IIIC & IV vs Ovarian Cancer Stages I, II, III & IV	2D						1592	Ovarian cancer stages I & II vs Endometrial Cancer Stages I & II	Supplemental
																1193	Endometrial Cancer Stages I, II, IIIC & IV vs Ovarian Cancer Stages I, II, III & IV	2D						1604	Ovarian cancer stages I & II vs Endometrial Cancer Stages I & II	Supplemental
																1199	Endometrial Cancer Stages I, II, IIIC & IV vs Ovarian Cancer Stages I, II, III & IV	2D						1613	Ovarian cancer stages I & II vs Endometrial Cancer Stages I & II	Supplemental
																1200	Endometrial Cancer Stages I, II, IIIC & IV vs Ovarian Cancer Stages I, II, III & IV	2D						1617	Ovarian cancer stages I & II vs Endometrial Cancer Stages I & II	Supplemental
																1202	Endometrial Cancer Stages I, II, IIIC & IV vs Ovarian Cancer Stages I, II, III & IV	2D						1622	Ovarian cancer stages I & II vs Endometrial Cancer Stages I & II	Supplemental
																1203	Endometrial Cancer Stages I, II, IIIC & IV vs Ovarian Cancer Stages I, II, III & IV	2D						1628	Ovarian cancer stages I & II vs Endometrial Cancer Stages I & II	Supplemental
																1204	Endometrial Cancer Stages I, II, IIIC & IV vs Ovarian Cancer Stages I, II, III & IV	2D						1637	Ovarian cancer stages I & II vs Endometrial Cancer Stages I & II	Supplemental
																1206	Endometrial Cancer Stages I, II, IIIC & IV vs Ovarian Cancer Stages I, II, III & IV	2D						1658	Ovarian cancer stages I & II vs Endometrial Cancer Stages I & II	Supplemental
																1207	Endometrial Cancer Stages I, II, IIIC & IV vs Ovarian Cancer Stages I, II, III & IV	2D						1661	Ovarian cancer stages I & II vs Endometrial Cancer Stages I & II	Supplemental
																1209	Endometrial Cancer Stages I, II, IIIC & IV vs Ovarian Cancer Stages I, II, III & IV	2D						1662	Ovarian cancer stages I & II vs Endometrial Cancer Stages I & II	Supplemental
																1210	Endometrial Cancer Stages I, II, IIIC & IV vs Ovarian Cancer Stages I, II, III & IV	2D						1686	Ovarian cancer stages I & II vs Endometrial Cancer Stages I & II	Supplemental
																1223	Endometrial Cancer Stages I, II, IIIC & IV vs Ovarian Cancer Stages I, II, III & IV	2D						1696	Ovarian cancer stages I & II vs Endometrial Cancer Stages I & II	Supplemental
																1227	Endometrial Cancer Stages I, II, IIIC & IV vs Ovarian Cancer Stages I, II, III & IV	2D						1705	Ovarian cancer stages I & II vs Endometrial Cancer Stages I & II	Supplemental
																1232	Endometrial Cancer Stages I, II, IIIC & IV vs Ovarian Cancer Stages I, II, III & IV	2D						1708	Ovarian cancer stages I & II vs Endometrial Cancer Stages I & II	Supplemental
																1234	Endometrial Cancer Stages I, II, IIIC & IV vs Ovarian Cancer Stages I, II, III & IV	2D						1743	Ovarian cancer stages I & II vs Endometrial Cancer Stages I & II	Supplemental
																1236	Endometrial Cancer Stages I, II, IIIC & IV vs Ovarian Cancer Stages I, II, III & IV	2D						1757	Ovarian cancer stages I & II vs Endometrial Cancer Stages I & II	Supplemental
																1237	Endometrial Cancer Stages I, II, IIIC & IV vs Ovarian Cancer Stages I, II, III & IV	2D						1771	Ovarian cancer stages I & II vs Endometrial Cancer Stages I & II	Supplemental
																1238	Endometrial Cancer Stages I, II, IIIC & IV vs Ovarian Cancer Stages I, II, III & IV	2D						1773	Ovarian cancer stages I & II vs Endometrial Cancer Stages I & II	Supplemental
																1241	Endometrial Cancer Stages I, II, IIIC & IV vs Ovarian Cancer Stages I, II, III & IV	2D						1781	Ovarian cancer stages I & II vs Endometrial Cancer Stages I & II	Supplemental
																1254	Endometrial Cancer Stages I, II, IIIC & IV vs Ovarian Cancer Stages I, II, III & IV	2D						1794	Ovarian cancer stages I & II vs Endometrial Cancer Stages I & II	Supplemental
																1255	Endometrial Cancer Stages I, II, IIIC & IV vs Ovarian Cancer Stages I, II, III & IV	2D						1797	Ovarian cancer stages I & II vs Endometrial Cancer Stages I & II	Supplemental
																1257	Endometrial Cancer Stages I, II, IIIC & IV vs Ovarian Cancer Stages I, II, III & IV	2D						1822	Ovarian cancer stages I & II vs Endometrial Cancer Stages I & II	Supplemental
																1258	Endometrial Cancer Stages I, II, IIIC & IV vs Ovarian Cancer Stages I, II, III & IV	2D						1824	Ovarian cancer stages I & II vs Endometrial Cancer Stages I & II	Supplemental
																1260	Endometrial Cancer Stages I, II, IIIC & IV vs Ovarian Cancer Stages I, II, III & IV	2D						1845	Ovarian cancer stages I & II vs Endometrial Cancer Stages I & II	Supplemental
																1265	Endometrial Cancer Stages I, II, IIIC & IV vs Ovarian Cancer Stages I, II, III & IV	2D						1847	Ovarian cancer stages I & II vs Endometrial Cancer Stages I & II	Supplemental
																1271	Endometrial Cancer Stages I, II, IIIC & IV vs Ovarian Cancer Stages I, II, III & IV	2D						1850	Ovarian cancer stages I & II vs Endometrial Cancer Stages I & II	Supplemental
																1272	Endometrial Cancer Stages I, II, IIIC & IV vs Ovarian Cancer Stages I, II, III & IV	2D						1868	Ovarian cancer stages I & II vs Endometrial Cancer Stages I & II	Supplemental
																1274	Endometrial Cancer Stages I, II, IIIC & IV vs Ovarian Cancer Stages I, II, III & IV	2D						1903	Ovarian cancer stages I & II vs Endometrial Cancer Stages I & II	Supplemental
																1279	Endometrial Cancer Stages I, II, IIIC & IV vs Ovarian Cancer Stages I, II, III & IV	2D						1909	Ovarian cancer stages I & II vs Endometrial Cancer Stages I & II	Supplemental
																1284	Endometrial Cancer Stages I, II, IIIC & IV vs Ovarian Cancer Stages I, II, III & IV	2D						1910	Ovarian cancer stages I & II vs Endometrial Cancer Stages I & II	Supplemental
																1292	Endometrial Cancer Stages I, II, IIIC & IV vs Ovarian Cancer Stages I, II, III & IV	2D						1912	Ovarian cancer stages I & II vs Endometrial Cancer Stages I & II	Supplemental
																1295	Endometrial Cancer Stages I, II, IIIC & IV vs Ovarian Cancer Stages I, II, III & IV	2D						1918	Ovarian cancer stages I & II vs Endometrial Cancer Stages I & II	Supplemental
																1297	Endometrial Cancer Stages I, II, IIIC & IV vs Ovarian Cancer Stages I, II, III & IV	2D						1925	Ovarian cancer stages I & II vs Endometrial Cancer Stages I & II	Supplemental
																1300	Endometrial Cancer Stages I, II, IIIC & IV vs Ovarian Cancer Stages I, II, III & IV	2D						1926	Ovarian cancer stages I & II vs Endometrial Cancer Stages I & II	Supplemental
																1304	Endometrial Cancer Stages I, II, IIIC & IV vs Ovarian Cancer Stages I, II, III & IV	2D						1933	Ovarian cancer stages I & II vs Endometrial Cancer Stages I & II	Supplemental
																1306	Endometrial Cancer Stages I, II, IIIC & IV vs Ovarian Cancer Stages I, II, III & IV	2D						1934	Ovarian cancer stages I & II vs Endometrial Cancer Stages I & II	Supplemental
																1308	Endometrial Cancer Stages I, II, IIIC & IV vs Ovarian Cancer Stages I, II, III & IV	2D						1944	Ovarian cancer stages I & II vs Endometrial Cancer Stages I & II	Supplemental
																1310	Endometrial Cancer Stages I, II, IIIC & IV vs Ovarian Cancer Stages I, II, III & IV	2D						1948	Ovarian cancer stages I & II vs Endometrial Cancer Stages I & II	Supplemental
																1317	Endometrial Cancer Stages I, II, IIIC & IV vs Ovarian Cancer Stages I, II, III & IV	2D						1953	Ovarian cancer stages I & II vs Endometrial Cancer Stages I & II	Supplemental
																1320	Endometrial Cancer Stages I, II, IIIC & IV vs Ovarian Cancer Stages I, II, III & IV	2D						1955	Ovarian cancer stages I & II vs Endometrial Cancer Stages I & II	Supplemental
																1329	Endometrial Cancer Stages I, II, IIIC & IV vs Ovarian Cancer Stages I, II, III & IV	2D						1958	Ovarian cancer stages I & II vs Endometrial Cancer Stages I & II	Supplemental
																1332	Endometrial Cancer Stages I, II, IIIC & IV vs Ovarian Cancer Stages I, II, III & IV	2D						1979	Ovarian cancer stages I & II vs Endometrial Cancer Stages I & II	Supplemental
																1335	Endometrial Cancer Stages I, II, IIIC & IV vs Ovarian Cancer Stages I, II, III & IV	2D
																1339	Endometrial Cancer Stages I, II, IIIC & IV vs Ovarian Cancer Stages I, II, III & IV	2D
																1343	Endometrial Cancer Stages I, II, IIIC & IV vs Ovarian Cancer Stages I, II, III & IV	2D
																1350	Endometrial Cancer Stages I, II, IIIC & IV vs Ovarian Cancer Stages I, II, III & IV	2D
																1351	Endometrial Cancer Stages I, II, IIIC & IV vs Ovarian Cancer Stages I, II, III & IV	2D
																1352	Endometrial Cancer Stages I, II, IIIC & IV vs Ovarian Cancer Stages I, II, III & IV	2D
																1354	Endometrial Cancer Stages I, II, IIIC & IV vs Ovarian Cancer Stages I, II, III & IV	2D
																1355	Endometrial Cancer Stages I, II, IIIC & IV vs Ovarian Cancer Stages I, II, III & IV	2D
																1357	Endometrial Cancer Stages I, II, IIIC & IV vs Ovarian Cancer Stages I, II, III & IV	2D
																1380	Endometrial Cancer Stages I, II, IIIC & IV vs Ovarian Cancer Stages I, II, III & IV	2D
																1383	Endometrial Cancer Stages I, II, IIIC & IV vs Ovarian Cancer Stages I, II, III & IV	2D
																1385	Endometrial Cancer Stages I, II, IIIC & IV vs Ovarian Cancer Stages I, II, III & IV	2D
																1387	Endometrial Cancer Stages I, II, IIIC & IV vs Ovarian Cancer Stages I, II, III & IV	2D
																1390	Endometrial Cancer Stages I, II, IIIC & IV vs Ovarian Cancer Stages I, II, III & IV	2D
																1400	Endometrial Cancer Stages I, II, IIIC & IV vs Ovarian Cancer Stages I, II, III & IV	2D
																1404	Endometrial Cancer Stages I, II, IIIC & IV vs Ovarian Cancer Stages I, II, III & IV	2D
																1405	Endometrial Cancer Stages I, II, IIIC & IV vs Ovarian Cancer Stages I, II, III & IV	2D
																1406	Endometrial Cancer Stages I, II, IIIC & IV vs Ovarian Cancer Stages I, II, III & IV	2D
																1407	Endometrial Cancer Stages I, II, IIIC & IV vs Ovarian Cancer Stages I, II, III & IV	2D
																1417	Endometrial Cancer Stages I, II, IIIC & IV vs Ovarian Cancer Stages I, II, III & IV	2D
																1418	Endometrial Cancer Stages I, II, IIIC & IV vs Ovarian Cancer Stages I, II, III & IV	2D
																1420	Endometrial Cancer Stages I, II, IIIC & IV vs Ovarian Cancer Stages I, II, III & IV	2D
																1425	Endometrial Cancer Stages I, II, IIIC & IV vs Ovarian Cancer Stages I, II, III & IV	2D
																1427	Endometrial Cancer Stages I, II, IIIC & IV vs Ovarian Cancer Stages I, II, III & IV	2D
																1439	Endometrial Cancer Stages I, II, IIIC & IV vs Ovarian Cancer Stages I, II, III & IV	2D
																1443	Endometrial Cancer Stages I, II, IIIC & IV vs Ovarian Cancer Stages I, II, III & IV	2D
																1445	Endometrial Cancer Stages I, II, IIIC & IV vs Ovarian Cancer Stages I, II, III & IV	2D
																1453	Endometrial Cancer Stages I, II, IIIC & IV vs Ovarian Cancer Stages I, II, III & IV	2D
																1468	Endometrial Cancer Stages I, II, IIIC & IV vs Ovarian Cancer Stages I, II, III & IV	2D
																1470	Endometrial Cancer Stages I, II, IIIC & IV vs Ovarian Cancer Stages I, II, III & IV	2D
																1471	Endometrial Cancer Stages I, II, IIIC & IV vs Ovarian Cancer Stages I, II, III & IV	2D
																1472	Endometrial Cancer Stages I, II, IIIC & IV vs Ovarian Cancer Stages I, II, III & IV	2D
																1473	Endometrial Cancer Stages I, II, IIIC & IV vs Ovarian Cancer Stages I, II, III & IV	2D
																1478	Endometrial Cancer Stages I, II, IIIC & IV vs Ovarian Cancer Stages I, II, III & IV	2D
																1480	Endometrial Cancer Stages I, II, IIIC & IV vs Ovarian Cancer Stages I, II, III & IV	2D
																1482	Endometrial Cancer Stages I, II, IIIC & IV vs Ovarian Cancer Stages I, II, III & IV	2D
																1496	Endometrial Cancer Stages I, II, IIIC & IV vs Ovarian Cancer Stages I, II, III & IV	2D
																1508	Endometrial Cancer Stages I, II, IIIC & IV vs Ovarian Cancer Stages I, II, III & IV	2D
																1511	Endometrial Cancer Stages I, II, IIIC & IV vs Ovarian Cancer Stages I, II, III & IV	2D
																1514	Endometrial Cancer Stages I, II, IIIC & IV vs Ovarian Cancer Stages I, II, III & IV	2D
																1517	Endometrial Cancer Stages I, II, IIIC & IV vs Ovarian Cancer Stages I, II, III & IV	2D
																1518	Endometrial Cancer Stages I, II, IIIC & IV vs Ovarian Cancer Stages I, II, III & IV	2D
																1519	Endometrial Cancer Stages I, II, IIIC & IV vs Ovarian Cancer Stages I, II, III & IV	2D
																1522	Endometrial Cancer Stages I, II, IIIC & IV vs Ovarian Cancer Stages I, II, III & IV	2D
																1537	Endometrial Cancer Stages I, II, IIIC & IV vs Ovarian Cancer Stages I, II, III & IV	2D
																1540	Endometrial Cancer Stages I, II, IIIC & IV vs Ovarian Cancer Stages I, II, III & IV	2D
																1543	Endometrial Cancer Stages I, II, IIIC & IV vs Ovarian Cancer Stages I, II, III & IV	2D
																1544	Endometrial Cancer Stages I, II, IIIC & IV vs Ovarian Cancer Stages I, II, III & IV	2D
																1546	Endometrial Cancer Stages I, II, IIIC & IV vs Ovarian Cancer Stages I, II, III & IV	2D
																1548	Endometrial Cancer Stages I, II, IIIC & IV vs Ovarian Cancer Stages I, II, III & IV	2D
																1549	Endometrial Cancer Stages I, II, IIIC & IV vs Ovarian Cancer Stages I, II, III & IV	2D
																1552	Endometrial Cancer Stages I, II, IIIC & IV vs Ovarian Cancer Stages I, II, III & IV	2D
																1555	Endometrial Cancer Stages I, II, IIIC & IV vs Ovarian Cancer Stages I, II, III & IV	2D
																1557	Endometrial Cancer Stages I, II, IIIC & IV vs Ovarian Cancer Stages I, II, III & IV	2D
																1563	Endometrial Cancer Stages I, II, IIIC & IV vs Ovarian Cancer Stages I, II, III & IV	2D
																1568	Endometrial Cancer Stages I, II, IIIC & IV vs Ovarian Cancer Stages I, II, III & IV	2D
																1583	Endometrial Cancer Stages I, II, IIIC & IV vs Ovarian Cancer Stages I, II, III & IV	2D
																1586	Endometrial Cancer Stages I, II, IIIC & IV vs Ovarian Cancer Stages I, II, III & IV	2D
																1588	Endometrial Cancer Stages I, II, IIIC & IV vs Ovarian Cancer Stages I, II, III & IV	2D
																1589	Endometrial Cancer Stages I, II, IIIC & IV vs Ovarian Cancer Stages I, II, III & IV	2D
																1590	Endometrial Cancer Stages I, II, IIIC & IV vs Ovarian Cancer Stages I, II, III & IV	2D
																1617	Endometrial Cancer Stages I, II, IIIC & IV vs Ovarian Cancer Stages I, II, III & IV	2D
																1622	Endometrial Cancer Stages I, II, IIIC & IV vs Ovarian Cancer Stages I, II, III & IV	2D
																1628	Endometrial Cancer Stages I, II, IIIC & IV vs Ovarian Cancer Stages I, II, III & IV	2D
																1647	Endometrial Cancer Stages I, II, IIIC & IV vs Ovarian Cancer Stages I, II, III & IV	2D
																1658	Endometrial Cancer Stages I, II, IIIC & IV vs Ovarian Cancer Stages I, II, III & IV	2D
																1661	Endometrial Cancer Stages I, II, IIIC & IV vs Ovarian Cancer Stages I, II, III & IV	2D
																1662	Endometrial Cancer Stages I, II, IIIC & IV vs Ovarian Cancer Stages I, II, III & IV	2D
																1665	Endometrial Cancer Stages I, II, IIIC & IV vs Ovarian Cancer Stages I, II, III & IV	2D
																1670	Endometrial Cancer Stages I, II, IIIC & IV vs Ovarian Cancer Stages I, II, III & IV	2D
																1686	Endometrial Cancer Stages I, II, IIIC & IV vs Ovarian Cancer Stages I, II, III & IV	2D
																1705	Endometrial Cancer Stages I, II, IIIC & IV vs Ovarian Cancer Stages I, II, III & IV	2D
																1706	Endometrial Cancer Stages I, II, IIIC & IV vs Ovarian Cancer Stages I, II, III & IV	2D
																1719	Endometrial Cancer Stages I, II, IIIC & IV vs Ovarian Cancer Stages I, II, III & IV	2D
																1743	Endometrial Cancer Stages I, II, IIIC & IV vs Ovarian Cancer Stages I, II, III & IV	2D
																1750	Endometrial Cancer Stages I, II, IIIC & IV vs Ovarian Cancer Stages I, II, III & IV	2D
																1753	Endometrial Cancer Stages I, II, IIIC & IV vs Ovarian Cancer Stages I, II, III & IV	2D
																1757	Endometrial Cancer Stages I, II, IIIC & IV vs Ovarian Cancer Stages I, II, III & IV	2D
																1773	Endometrial Cancer Stages I, II, IIIC & IV vs Ovarian Cancer Stages I, II, III & IV	2D
																1779	Endometrial Cancer Stages I, II, IIIC & IV vs Ovarian Cancer Stages I, II, III & IV	2D
																1781	Endometrial Cancer Stages I, II, IIIC & IV vs Ovarian Cancer Stages I, II, III & IV	2D
																1794	Endometrial Cancer Stages I, II, IIIC & IV vs Ovarian Cancer Stages I, II, III & IV	2D
																1795	Endometrial Cancer Stages I, II, IIIC & IV vs Ovarian Cancer Stages I, II, III & IV	2D
																1796	Endometrial Cancer Stages I, II, IIIC & IV vs Ovarian Cancer Stages I, II, III & IV	2D
																1797	Endometrial Cancer Stages I, II, IIIC & IV vs Ovarian Cancer Stages I, II, III & IV	2D
																1808	Endometrial Cancer Stages I, II, IIIC & IV vs Ovarian Cancer Stages I, II, III & IV	2D
																1840	Endometrial Cancer Stages I, II, IIIC & IV vs Ovarian Cancer Stages I, II, III & IV	2D
																1844	Endometrial Cancer Stages I, II, IIIC & IV vs Ovarian Cancer Stages I, II, III & IV	2D
																1850	Endometrial Cancer Stages I, II, IIIC & IV vs Ovarian Cancer Stages I, II, III & IV	2D
																1868	Endometrial Cancer Stages I, II, IIIC & IV vs Ovarian Cancer Stages I, II, III & IV	2D
																1896	Endometrial Cancer Stages I, II, IIIC & IV vs Ovarian Cancer Stages I, II, III & IV	2D
																1899	Endometrial Cancer Stages I, II, IIIC & IV vs Ovarian Cancer Stages I, II, III & IV	2D
																1903	Endometrial Cancer Stages I, II, IIIC & IV vs Ovarian Cancer Stages I, II, III & IV	2D
																1906	Endometrial Cancer Stages I, II, IIIC & IV vs Ovarian Cancer Stages I, II, III & IV	2D
																1907	Endometrial Cancer Stages I, II, IIIC & IV vs Ovarian Cancer Stages I, II, III & IV	2D
																1912	Endometrial Cancer Stages I, II, IIIC & IV vs Ovarian Cancer Stages I, II, III & IV	2D
																1921	Endometrial Cancer Stages I, II, IIIC & IV vs Ovarian Cancer Stages I, II, III & IV	2D
																1923	Endometrial Cancer Stages I, II, IIIC & IV vs Ovarian Cancer Stages I, II, III & IV	2D
																1925	Endometrial Cancer Stages I, II, IIIC & IV vs Ovarian Cancer Stages I, II, III & IV	2D
																1933	Endometrial Cancer Stages I, II, IIIC & IV vs Ovarian Cancer Stages I, II, III & IV	2D
																1938	Endometrial Cancer Stages I, II, IIIC & IV vs Ovarian Cancer Stages I, II, III & IV	2D
																1948	Endometrial Cancer Stages I, II, IIIC & IV vs Ovarian Cancer Stages I, II, III & IV	2D
																1949	Endometrial Cancer Stages I, II, IIIC & IV vs Ovarian Cancer Stages I, II, III & IV	2D
																1953	Endometrial Cancer Stages I, II, IIIC & IV vs Ovarian Cancer Stages I, II, III & IV	2D
																1955	Endometrial Cancer Stages I, II, IIIC & IV vs Ovarian Cancer Stages I, II, III & IV	2D
																1958	Endometrial Cancer Stages I, II, IIIC & IV vs Ovarian Cancer Stages I, II, III & IV	2D
																1961	Endometrial Cancer Stages I, II, IIIC & IV vs Ovarian Cancer Stages I, II, III & IV	2D
																1973	Endometrial Cancer Stages I, II, IIIC & IV vs Ovarian Cancer Stages I, II, III & IV	2D
