# Supplementary material for: The Role of Insulin-like Peptide in Maintaining Hemolymph Glucose Homeostasis in the Pacific White Shrimp Litopenaeus vannamei
Source: Int J Mol Sci. 2022 Mar 17;23(6):3268. doi: 10.3390/ijms23063268 (PMC8948857; doi:10.3390/ijms23063268)
Supplement: Supplementary file 1 [file ijms-23-03268-s001.zip › Supplementary SB. File SB4. LOOCV results of sera MS peaks.xlsx]

## Sheet: OV_12_v_Endo_12
						Cut Off lower	Cut Off primary	c-0 val	c-o mult	stdev	mean					1	2	3	4	5	6	7	8	9	10	11	12	13	14	15	16	17	18	19	20
						85.0091	56.6593	14.1749	3.15	4.49997	70.8342	20	2	GROUP_2	Ovarian Cancer Stages I, N=16; II, N=4	77.9592	78.8	70.751	74.2972	71.6535	75	66.1417	63.0522	70.6349	68.2353	75.3968	69.7211	68.254	69.0476	68.1275	67.3307	70.2811	78.8	66.6667	66.5339
Ovarian Cancer Stages I, N=16; II, N=4 vs. Endometrial Cancer Stages I, N=19; II, N=1						56.6766	22.7283	16.9741	3.15	5.38862	39.7024	20	3	GROUP_3	Endometrial Cancer Stages I, N=19; II, N=1	32.6531	50.6073	38	36.7347	31.4516	35.8871	44.4	32.4	48.3871	37.037	47.619	41.1523	35.5372	40.5622	39.0244	37.1429	45.0199	42.5101	37.6	40.3226
1.50544e-21						61.1291	41.171	9.97903	3.15	3.16795	51.1501	20	4	GROUP_4	RND: Ovarian Cancer Stages I, N=16; II, N=4	52.2822	48.3607	56.0166	53.5565	52.0325	55.8333	47.9839	51.9841	46.5587	49.7925	48.3871	51.2295	50.6383	49.8024	49.187	54.2017	46.9388	56.4854	47.2222	54.5082
RND: Ovarian Cancer Stages I, N=16; II, N=4 vs. RND: Endometrial Cancer Stages I, N=19; II, N=1						58.6665	38.9539	9.85629	3.15	3.12898	48.8102	20	5	GROUP_5	RND: Endometrial Cancer Stages I, N=19; II, N=1	44.898	48.9879	53.9683	42.6778	52.381	47.6793	46.1864	49.8039	48.5714	49.5868	45.5285	46.3203	49.1736	50.431	44.3966	53.012	52.2449	50.2092	47.8261	52.3207
0.0120316
							Cut Off	c-0 val	c-o mult	stdev	mean					1	2	3	4	5	6	7	8	9	10	11	12	13	14	15	16	17	18	19	20
							14.9909	14.1749	3.15	4.49997	29.1658	20	2	GROUP_2	Ovarian Cancer Stages I, N=16; II, N=4	22.0408	21.2	29.249	25.7028	28.3465	25	33.8583	36.9478	29.3651	31.7647	24.6032	30.2789	31.746	30.9524	31.8725	32.6693	29.7189	21.2	33.3333	33.4661
							43.3234	16.9741	3.15	5.38862	60.2976	20	3	GROUP_3	Endometrial Cancer Stages I, N=19; II, N=1	67.3469	49.3927	62	63.2653	68.5484	64.1129	55.6	67.6	51.6129	62.963	52.381	58.8477	64.4628	59.4378	60.9756	62.8571	54.9801	57.4899	62.4	59.6774
mean ratio minimum							38.8709	9.97903	3.15	3.16795	48.8499	20	4	GROUP_4	RND: Ovarian Cancer Stages I, N=16; II, N=4	47.7178	51.6393	43.9834	46.4435	47.9675	44.1667	52.0161	48.0159	53.4413	50.2075	51.6129	48.7705	49.3617	50.1976	50.813	45.7983	53.0612	43.5146	52.7778	45.4918
0							41.3335	9.85629	3.15	3.12898	51.1898	20	5	GROUP_5	RND: Endometrial Cancer Stages I, N=19; II, N=1	55.102	51.0121	46.0317	57.3222	47.619	52.3207	53.8136	50.1961	51.4286	50.4132	54.4715	53.6797	50.8264	49.569	55.6034	46.988	47.7551	49.7908	52.1739	47.6793
mean diff minimum
5
RND: mean ratio minimum
0
RND: mean diff minimum
0
VALID TEST
1
FIRST GROUP	PEAK_M_Z	available to test	frequency selected	contained in calculation	random freq
1	150		0		0
SECOND GROUP	151		0		0
2	152		0		0
FIRST GROUP NAME	153		0		0
LCQ2_(all compaired samples N=82)	154		0		0
SECOND GROUP NAME	155		0		0
Ovarian Cancer Stages I, N=16; II, N=4	156		0		0
VALID TEST NAME	157		0		0
LCQ2_(all compaired samples N=82) vs. Ovarian Cancer Stages I, N=16; II, N=4	158		0		0
p-VALUE CUTOFF MAX True pathology	159		0		0
0.05	160		0		0
Frequency cutoff min True pathology	161		0		0
0.81	162		0		0
primary cutoff factor	163		0		0
3.15	164		0		0
secondary cutoff factor	165		0		0
3.15	166		0		0
p-VALUE CUTOFF MAX Random pathology	167		0		0
0.08	168		0		0
Frequency cutoff min Random pathology	169		0		0
0	170		0		0
	171		0		0
max peaks observed	172		0		0
1511	173		0		0
max true pathology peaks	174		0		0
255	175		0		0
min true pathology peaks	176		0		0
242	177		0		0
max random pathology peaks	178		0		0
255	179		0		0
min random pathology peaks	180		0		0
230	181		0		0
% max true pathology peaks	182		0		0
0.168762	183		0		0
% min true pathology peaks	184		0		0
0.160159	185		0		0
% max random pathology peaks	186		0		0
0.168762	187		0		0
% min random pathology peaks	188		0		0
0.152217	189		0		0
	190		0		0
	191		0		0
	192		0		0
	193		0		0
	194		0		0
	195		0		0
	196		0		0
	197		0		0
	198		0		0
	199		0		0
	200		0		0
	201		0		0
	202		0		0
	203		0		0
	204		0		0
	205		0		0
	206		0		0
	207		0		0
	208		0		0
	209		0		0
	210		0		0
	211		0		0
	212		0		0
	213		0		0
	214		0		0
	215		0		0
	216		0		0
	217		0		0
	218		0		0
	219		0		0
	220		0		0
	221		0		0
	222		0		0
	223		0		0
	224		0		0
	225		0		0
	226		0		0
	227		0		0
	228		0		0
	229		0		0
	230		0		0
	231		0		0
	232		0		0
	233		0		0
	234		0		0
	235		0		0
	236		0		0
	237		0		0
	238		0		0
	239		0		0
	240		0		0
	241		0		0
	242		0		0
	243		0		0
	244		0		0
	245		0		0
	246		0		0
	247		0		0
	248		0		0
	249		0		0
	250		0		0
	251		0		0
	252		0		0
	253		0		0
	254		0		0
	255		0		0
	256		0		0
	257		0		0
	258		0		0
	259		0		0
	260		0		0
	261		0		0
	262		0		0
	263		0		0
	264		0		0
	265		0		0
	266		0		0
	267		0		0
	268		0		0
	269		0		0
	270		0		0
	271		0		0
	272		0		0
	273		0		0
	274		0		0
	275		0		0
	276		0		0
	277		0		0
	278		0		0
	279		0		0
	280		0		0
	281		0		0
	282		0		0
	283		0		0
	284		0		0
	285		0		0
	286		0		0
	287		0		0
	288		0		0
	289		0		0
	290		0		0
	291		0		0
	292		0		0
	293		0		0
	294		0		0
	295		0		0
	296		0		0
	297		0		0
	298		0		0
	299		0		0
	300		0		0
	301		0		0
	302		0		0
	303		0		0
	304		0		0
	305		0		0
	306		0		0
	307		0		0
	308		0		0
	309		0		0
	310		0		0
	311		0		0
	312		0		0
	313		0		0
	314		0		0
	315		0		0
	316		0		0
	317		0		0
	318		0		0
	319		0		0
	320		0		0
	321		0		0
	322		0		0
	323		0		0
	324		0		0
	325		0		0
	326		0		0
	327		0		0
	328		0		0
	329		0		0
	330		0		0
	331		0		0
	332		0		0
	333		0		0
	334		0		0
	335		0		0
	336		0		0
	337		0		0
	338		0		0
	339		0		0
	340		0		0
	341		0		0
	342		0		0
	343		0		0
	344		0		0
	345		0		0
	346		0		0
	347		0		0
	348		0		0
	349		0		0
	350		0		0
	351		0		0
	352		0		0
	353		0		0
	354		0		0
	355		0		0
	356		0		0
	357		0		0
	358		0		0
	359		0		0
	360		0		0
	361		0		0
	362		0		0
	363		0		0
	364		0		0
	365		0		0
	366		0		0
	367		0		0
	368		0		0
	369		0		0
	370		0		0
	371		0		0
	372		0		0
	373		0		0
	374		0		0
	375		0		0
	376		0		0
	377		0		0
	378		0		0
	379		0		0
	380		0		0
	381		0		0
	382		0		0
	383		0		0
	384		0		0
	385		0		0
	386		0		0
	387		0		0
	388		0		0
	389		0		0
	390		0		0
	391		0		0
	392		0		0
	393		0		0
	394		0		0
	395		0		0
	396		0		0
	397		0		0
	398		0		0
	399		0		0
	400		0		0
	401		0		0
	402		0		0
	403		0		0
	404		0		0
	405		0		0
	406		0		0
	407		0		0
	408		0		0
	409		0		0
	410		0		0
	411		0		0
	412		0		0
	413		0		0
	414		0		0
	415		0		0
	416		0		0
	417		0		0
	418		0		0
	419		0		0
	420		0		0
	421		0		0
	422		0		0
	423		0		0
	424		0		0
	425		0		0
	426		0		0
	427		0		0
	428		0		0
	429		0		0
	430		0		0
	431		0		0
	432		0		0
	433		0		0
	434		0		0
	435		0		0
	436		0		0
	437		0		0
	438		0		0
	439		0		0
	440		0		0
	441		0		0
	442		0		0
	443		0		0
	444		0		0
	445		0		0
	446		0		0
	447		0		0
	448		0		0
	449		0		0
	450		0		0
	451		0		0
	452		0		0
	453		0		0
	454		0		0
	455		0		0
	456		0		0
	457		0		0
	458		0		0
	459		0		0
	460		0		0
	461		0		0
	462		0		0
	463		0		0
	464		0		0
	465		0		0
	466		0		0
	467		0		0
	468		0		0
	469		0		0
	470		0		0
	471		0		0
	472		0		0
	473		0		0
	474		0		0
	475		0		0
	476		0		0
	477		0		0
	478		0		0
	479		0		0
	480		0		0
	481		0		0
	482		0		0
	483		0		0
	484		0		0
	485		0		0
	486		0		0
	487		0		0
	488		0		0
	489		0		0
	490	1	0		0.9
	491	1	0		0.025
	492	1	1.5	1	0
	493	1	0		0
	494	1	0		0
	495	1	0		0.125
	496	1	1.5	1	0.05
	497	1	0		1
	498	1	0		0
	499	1	0		1
	500	1	0		0
	501	1	0		0.05
	502	1	0		0
	503	1	0		0
	504	1	0		0
	505	1	0		0.2
	506	1	1.5	1	0.025
	507	1	0		0.8
	508	1	0		0
	509	1	0		0
	510	1	0		0.8
	511	1	0		1
	512	1	0		0
	513	1	0		0.475
	514	1	0		0
	515	1	0		0
	516	1	0		1
	517	1	1.5	1	0.05
	518	1	1.5	1	0.025
	519	1	0		0.05
	520	1	1.35	1	0.025
	521	1	0		1
	522	1	0		0
	523	1	0		0
	524	1	0		0.35
	525	1	0		0
	526	1	1.5	1	0
	527	1	0		0
	528	1	1.5	1	0.825
	529	1	0		0.025
	530	1	1.5	1	0
	531	1	0		0
	532	1	0		0
	533	1	0		0.4
	534	1	0		0
	535	1	0		0
	536	1	0		0
	537	1	0		0.425
	538	1	0		0
	539	1	0		0
	540	1	0		1
	541	1	0		0
	542	1	0		0
	543	1	0		0
	544	1	0		1
	545	1	0		0
	546	1	0		0
	547	1	0		0
	548	1	0		0.025
	549	1	1.5	1	1
	550	1	1.45	1	0.025
	551	1	0		0.025
	552	1	0		0
	553	1	0		0.025
	554	1	0		0
	555	1	0		1
	556	1	1.5	1	0
	557	1	1.5	1	0
	558	1	0		1
	559	1	0		0
	560	1	0		0
	561	1	0		0
	562	1	0		0
	563	1	0		0
	564	1	0		0.025
	565	1	0		0
	566	1	0		0
	567	1	0		0
	568	1	0		0
	569	1	0		0
	570	1	0		0
	571	1	0		0
	572	1	0		0
	573	1	1.325	1	0
	574	1	0		1
	575	1	0		0
	576	1	0		0
	577	1	0		0.525
	578	1	0		0
	579	1	0		1
	580	1	0		0
	581	1	0		0
	582	1	0		0
	583	1	0		0
	584	1	0		0
	585	1	1.5	1	0.025
	586	1	0		0.075
	587	1	0		0.025
	588	1	1.5	1	0
	589	1	0		0.025
	590	1	0		0
	591	1	0		0
	592	1	0		0.025
	593	1	0		1
	594	1	0		0.275
	595	1	0		0
	596	1	0		0.125
	597	1	0		1
	598	1	0		0
	599	1	0		0
	600	1	0		0
	601	1	1.5	1	0
	602	1	0		0.825
	603	1	1.5	1	0
	604	1	1.5	1	0.6
	605	1	1.5	1	0
	606	1	0		0
	607	1	0		0
	608	1	0		0
	609	1	0		0.275
	610	1	0		0
	611	1	0		0
	612	1	0		0.975
	613	1	0		0.9
	614	1	1.1	1	0
	615	1	1.5	1	0
	616	1	0		0
	617	1	0		0.025
	618	1	0		0
	619	1	1.5	1	0
	620	1	0		0
	621	1	0.85	1	0
	622	1	1.4	1	0
	623	1	0		0
	624	1	0		1
	625	1	1.5	1	0.025
	626	1	1.5	1	0
	627	1	1.475	1	0
	628	1	1.5	1	0
	629	1	1.5	1	0
	630	1	0		0
	631	1	1.5	1	0
	632	1	0		1
	633	1	0		0
	634	1	0		0
	635	1	1.5	1	0
	636	1	0		0.95
	637	1	1.5	1	0
	638	1	1.5	1	0
	639	1	0		0
	640	1	0		0
	641	1	0		1
	642	1	0		0
	643	1	0		0
	644	1	1.3	1	0.275
	645	1	0		0.025
	646	1	0		0
	647	1	0		0
	648	1	1.425	1	0.4
	649	1	0		0
	650	1	0		0
	651	1	1.45	1	0
	652	1	0		0
	653	1	0		0
	654	1	1.5	1	0
	655	1	0		0.375
	656	1	0		1
	657	1	1.5	1	0
	658	1	0		0
	659	1	0		0
	660	1	0		0
	661	1	0		0
	662	1	0		0
	663	1	0		1
	664	1	0		0
	665	1	0		0
	666	1	0		0
	667	1	0		0
	668	1	0		0
	669	1	0		0
	670	1	1.5	1	0
	671	1	0		0.025
	672	1	0		0
	673	1	1.3	1	0
	674	1	0		0
	675	1	0		0.3
	676	1	0		0
	677	1	0		1
	678	1	1.5	1	0
	679	1	1.5	1	0.425
	680	1	0		0.925
	681	1	1.35	1	0
	682	1	1.5	1	0.025
	683	1	1.475	1	0
	684	1	0		0
	685	1	1.5	1	0.075
	686	1	0		0.05
	687	1	0		0
	688	1	1.35	1	0
	689	1	0		1
	690	1	0		0
	691	1	0		1
	692	1	0		0
	693	1	0		0
	694	1	0		1
	695	1	0		0
	696	1	0		0
	697	1	0		0
	698	1	0		0.025
	699	1	0		0.025
	700	1	0		0
	701	1	0		0.85
	702	1	0		0
	703	1	1.5	1	1
	704	1	1.35	1	0
	705	1	0		0.025
	706	1	0		0.025
	707	1	1.5	1	0.05
	708	1	0		0
	709	1	0		0.35
	710	1	0		1
	711	1	1.35	1	1
	712	1	0		0
	713	1	1.5	1	0
	714	1	0		0.075
	715	1	0		0
	716	1	0		0
	717	1	0		0
	718	1	0		0.275
	719	1	0		0
	720	1	0		0
	721	1	1.5	1	0
	722	1	1.5	1	0
	723	1	0		0
	724	1	0		0.025
	725	1	0		0
	726	1	0		0.075
	727	1	0		0.025
	728	1	1.15	1	0.375
	729	1	1.3	1	0
	730	1	0		0
	731	1	1.5	1	0
	732	1	0		0.85
	733	1	0		0
	734	1	0		1
	735	1	0		0
	736	1	1.5	1	1
	737	1	0		0
	738	1	1.225	1	0.025
	739	1	0		0.025
	740	1	1.5	1	0
	741	1	1.475	1	0
	742	1	0		0
	743	1	0		0
	744	1	0		0
	745	1	0		0
	746	1	0		0
	747	1	0		0
	748	1	0		0
	749	1	0		0
	750	1	0		0.025
	751	1	1.35	1	0
	752	1	0		0
	753	1	0		0
	754	1	0		0.05
	755	1	0		0.9
	756	1	0		0
	757	1	0		0
	758	1	0		0
	759	1	0		0
	760	1	0		0
	761	1	0		0
	762	1	0		0
	763	1	0		0
	764	1	0		0
	765	1	0		0
	766	1	0		0
	767	1	0		0
	768	1	0		0.025
	769	1	0		0
	770	1	0		1
	771	1	0		0
	772	1	0		0
	773	1	0		0
	774	1	0		0
	775	1	0		0
	776	1	0		0
	777	1	0		0
	778	1	1.5	1	1
	779	1	0		0
	780	1	0		0.975
	781	1	1.5	1	0
	782	1	0		0.475
	783	1	0		0
	784	1	0		0
	785	1	0		0
	786	1	0		0
	787	1	0		0.875
	788	1	0		0.025
	789	1	0		0
	790	1	0		0
	791	1	0		0
	792	1	0		0
	793	1	0		0
	794	1	0		1
	795	1	1.5	1	0
	796	1	1.5	1	1
	797	1	0		0
	798	1	1.5	1	0
	799	1	1.5	1	0.425
	800	1	0		0
	801	1	0		0
	802	1	0		0
	803	1	1.5	1	0
	804	1	0		0
	805	1	0		0
	806	1	0		0
	807	1	0		0.025
	808	1	0		0
	809	1	0		0
	810	1	0		0.025
	811	1	0		1
	812	1	0		0
	813	1	0		0
	814	1	0		0.3
	815	1	0		0
	816	1	0		0
	817	1	0		0
	818	1	1.5	1	0
	819	1	0		0
	820	1	0		0
	821	1	0		0.925
	822	1	0		0
	823	1	0		0
	824	1	0		0.05
	825	1	0		0
	826	1	0		0
	827	1	1.5	1	0
	828	1	1.225	1	0.975
	829	1	1.175	1	0
	830	1	0		0
	831	1	0		0
	832	1	0		0
	833	1	0		0
	834	1	1.3	1	0.025
	835	1	0		0
	836	1	0.875	1	0
	837	1	0		0
	838	1	0		0
	839	1	0		0
	840	1	0		0
	841	1	1.5	1	0
	842	1	0		0
	843	1	0		0.05
	844	1	0		0
	845	1	0		0.025
	846	1	0		0.05
	847	1	0		0
	848	1	0		0.225
	849	1	0		0.05
	850	1	0		0
	851	1	0		0
	852	1	1.5	1	0
	853	1	0		0.05
	854	1	1.475	1	0.025
	855	1	0		0.05
	856	1	0		0.85
	857	1	0		0.45
	858	1	0		0
	859	1	0		0
	860	1	0		1
	861	1	0		0
	862	1	0		0
	863	1	0		1
	864	1	0		0
	865	1	1.45	1	0
	866	1	0		0.025
	867	1	0		0
	868	1	0		1
	869	1	0		0
	870	1	0		0
	871	1	0		0
	872	1	0		0
	873	1	0		0.85
	874	1	0		0
	875	1	0		1
	876	1	0		0
	877	1	0		0
	878	1	1.475	1	0.825
	879	1	1.5	1	0.05
	880	1	0		0
	881	1	0		0
	882	1	0		0
	883	1	0		0.875
	884	1	0		0
	885	1	0		0
	886	1	1.3	1	0.025
	887	1	0		0.05
	888	1	0		0
	889	1	1.35	1	0.05
	890	1	0		0.05
	891	1	0		0
	892	1	0		0.375
	893	1	0		0
	894	1	0		0.05
	895	1	0		0
	896	1	1.5	1	0
	897	1	0		0
	898	1	0		0
	899	1	0		0
	900	1	0		0.075
	901	1	0		0
	902	1	0		0
	903	1	0		0
	904	1	0		0.025
	905	1	0		0
	906	1	0		0
	907	1	1.5	1	0
	908	1	0		0.025
	909	1	0		0
	910	1	0		0
	911	1	0		0
	912	1	0		0
	913	1	0		0.9
	914	1	0		0
	915	1	0		0
	916	1	0		0.425
	917	1	0		0
	918	1	0		0
	919	1	1.5	1	0
	920	1	0		0.025
	921	1	0		0.025
	922	1	0		0
	923	1	0		0
	924	1	0		0.025
	925	1	0		1
	926	1	0		0
	927	1	0		0
	928	1	0		0.025
	929	1	0		0
	930	1	0		0
	931	1	0		0.025
	932	1	0		0
	933	1	0		0
	934	1	0		0
	935	1	0		0
	936	1	0		0
	937	1	1.5	1	0
	938	1	0		0.025
	939	1	0		0
	940	1	0		0
	941	1	0		0.4
	942	1	0		1
	943	1	1.5	1	0.075
	944	1	0		0
	945	1	0		0.45
	946	1	0		1
	947	1	0		0.025
	948	1	0		0
	949	1	1.5	1	0.425
	950	1	0		0
	951	1	0		0.375
	952	1	0		1
	953	1	1.5	1	0.825
	954	1	0		0
	955	1	0		0.525
	956	1	0		0
	957	1	1.05	1	0.025
	958	1	0		0.025
	959	1	0		0.05
	960	1	0		0.85
	961	1	0		0.525
	962	1	1.5	1	0.05
	963	1	0		0
	964	1	0		0
	965	1	0		0
	966	1	0		0
	967	1	0		0
	968	1	1.5	1	1
	969	1	1.5	1	0
	970	1	1.5	1	0
	971	1	1.5	1	0
	972	1	0		0
	973	1	0		0.025
	974	1	0		0
	975	1	0		0
	976	1	0		0
	977	1	0		0
	978	1	0		0
	979	1	0		0
	980	1	0		0
	981	1	0		0
	982	1	0		0
	983	1	0		0.925
	984	1	0		0.025
	985	1	1.25	1	0
	986	1	0		0
	987	1	0		0
	988	1	0		0
	989	1	0		0
	990	1	0		0
	991	1	0		0
	992	1	0		0
	993	1	0		0
	994	1	0		0
	995	1	0		0
	996	1	0		0
	997	1	1.5	1	0
	998	1	0		0.025
	999	1	1.45	1	0.025
	1000	1	0		0
	1001	1	0		0
	1002	1	0		0
	1003	1	0		1
	1004	1	1.5	1	0
	1005	1	0		0.025
	1006	1	0		0.025
	1007	1	0		1
	1008	1	0		0
	1009	1	0		1
	1010	1	0		0
	1011	1	0		0
	1012	1	0		0
	1013	1	0		0
	1014	1	0		0
	1015	1	0		0
	1016	1	0		1
	1017	1	0		0
	1018	1	0		0
	1019	1	0		1
	1020	1	0		0
	1021	1	0		0
	1022	1	0		0
	1023	1	0		0.575
	1024	1	0		0
	1025	1	0		0.025
	1026	1	0		0
	1027	1	0		0
	1028	1	0		0
	1029	1	0		0.025
	1030	1	0		0
	1031	1	0		0
	1032	1	1.5	1	0
	1033	1	0		0
	1034	1	0		0.85
	1035	1	0		0
	1036	1	0		0
	1037	1	0		0
	1038	1	0		0
	1039	1	0		0
	1040	1	0		0
	1041	1	1.5	1	0
	1042	1	1.475	1	0
	1043	1	0		0
	1044	1	0		0
	1045	1	0		0
	1046	1	0		0
	1047	1	0		1
	1048	1	0		0
	1049	1	0		0
	1050	1	0		0.35
	1051	1	0		0
	1052	1	0		0
	1053	1	0		0
	1054	1	0		0.05
	1055	1	0		0
	1056	1	0		0
	1057	1	0		0
	1058	1	0		0
	1059	1	0		0
	1060	1	0		0
	1061	1	0		0.925
	1062	1	0		0.025
	1063	1	0		0.35
	1064	1	0		0
	1065	1	1.5	1	0
	1066	1	0		0
	1067	1	0		0
	1068	1	0		0.6
	1069	1	0		0.875
	1070	1	0		0
	1071	1	0		0.025
	1072	1	0		0
	1073	1	1.475	1	0
	1074	1	0		0
	1075	1	0		0
	1076	1	0		0
	1077	1	1.15	1	0
	1078	1	1.5	1	0.35
	1079	1	0		0
	1080	1	1.5	1	0
	1081	1	1.5	1	0
	1082	1	1.475	1	0
	1083	1	0		0
	1084	1	0		0.075
	1085	1	0		0.025
	1086	1	0		0
	1087	1	0		0
	1088	1	1.5	1	0
	1089	1	0		0
	1090	1	1.5	1	0
	1091	1	0		0.025
	1092	1	0		0
	1093	1	0		0
	1094	1	0		1
	1095	1	0		0
	1096	1	1.4	1	0
	1097	1	0		0
	1098	1	0		0.775
	1099	1	0		0.975
	1100	1	0		0
	1101	1	0		0
	1102	1	0		0.275
	1103	1	1.5	1	0
	1104	1	0		0
	1105	1	0		0
	1106	1	1.4	1	1
	1107	1	1.2	1	0
	1108	1	0		0
	1109	1	1.5	1	0.95
	1110	1	0		1
	1111	1	0		0
	1112	1	1.5	1	0
	1113	1	0		0.85
	1114	1	0		0
	1115	1	0		0.4
	1116	1	0		0
	1117	1	0		0.825
	1118	1	1.5	1	0
	1119	1	0		0.95
	1120	1	1.5	1	0
	1121	1	0		0.95
	1122	1	1.35	1	0.025
	1123	1	0		0.925
	1124	1	1.5	1	0
	1125	1	1.5	1	0.85
	1126	1	0		1
	1127	1	1.5	1	0
	1128	1	0.95	1	0
	1129	1	0		0
	1130	1	0		0
	1131	1	0		0
	1132	1	0		0
	1133	1	0		1
	1134	1	0		0
	1135	1	0		1
	1136	1	0		0
	1137	1	0		0
	1138	1	0		0
	1139	1	0		0
	1140	1	0		0.025
	1141	1	0		0.025
	1142	1	0		0.35
	1143	1	0		0
	1144	1	0		0
	1145	1	0		0
	1146	1	0		0
	1147	1	0		0.025
	1148	1	1.45	1	0
	1149	1	1.5	1	0
	1150	1	0		0
	1151	1	1.225	1	0
	1152	1	1.5	1	0
	1153	1	0		0.925
	1154	1	0		0.025
	1155	1	1.4	1	0.85
	1156	1	0		0
	1157	1	0		0
	1158	1	0		0
	1159	1	0		0
	1160	1	0		0
	1161	1	0		0
	1162	1	1.5	1	0
	1163	1	0		0
	1164	1	0		0
	1165	1	0		0
	1166	1	0		0
	1167	1	1.5	1	1
	1168	1	1.5	1	0
	1169	1	1.5	1	0.025
	1170	1	0		1
	1171	1	0		0.05
	1172	1	0		0
	1173	1	1.475	1	0
	1174	1	0		0
	1175	1	0		0
	1176	1	0		0
	1177	1	0		0.025
	1178	1	0		0
	1179	1	0		0
	1180	1	1.5	1	0
	1181	1	1.5	1	0
	1182	1	0		0.05
	1183	1	0		0
	1184	1	0		0.05
	1185	1	0		0
	1186	1	0		0
	1187	1	0		1
	1188	1	1.5	1	0
	1189	1	0		0
	1190	1	0		0
	1191	1	1.5	1	0
	1192	1	0		0
	1193	1	0		0
	1194	1	0		0
	1195	1	0		1
	1196	1	0		0
	1197	1	0		0.95
	1198	1	0		0.9
	1199	1	0		0.025
	1200	1	1.5	1	0
	1201	1	0		0
	1202	1	0		0
	1203	1	1.45	1	0
	1204	1	1.5	1	0
	1205	1	1.35	1	0
	1206	1	0.875	1	0
	1207	1	0		0
	1208	1	0		1
	1209	1	1.5	1	0.025
	1210	1	1.475	1	0
	1211	1	0		0
	1212	1	0		0.375
	1213	1	0		0
	1214	1	0		0
	1215	1	0		1
	1216	1	0		0
	1217	1	0		0
	1218	1	0		0
	1219	1	0		0.475
	1220	1	0		0.025
	1221	1	1.5	1	0
	1222	1	0		0
	1223	1	0		0
	1224	1	1.5	1	0
	1225	1	0		0
	1226	1	0		0
	1227	1	0		0
	1228	1	0		0
	1229	1	0		0
	1230	1	0		0
	1231	1	0		0
	1232	1	1.5	1	0.025
	1233	1	0		1
	1234	1	1.5	1	0
	1235	1	0		0.025
	1236	1	0		0
	1237	1	1.5	1	0
	1238	1	0		0.05
	1239	1	0		0
	1240	1	0		0
	1241	1	1.5	1	0
	1242	1	0		0
	1243	1	0		1
	1244	1	0		0.4
	1245	1	0		0.375
	1246	1	0		0.1
	1247	1	0		0
	1248	1	0		0
	1249	1	0		0
	1250	1	0		0
	1251	1	0		0
	1252	1	0		0
	1253	1	0		0
	1254	1	0		0
	1255	1	0		0
	1256	1	0		0.025
	1257	1	1.5	1	0
	1258	1	1.5	1	0
	1259	1	0		0
	1260	1	1.5	1	0.025
	1261	1	0		0.025
	1262	1	0		0
	1263	1	0		0
	1264	1	1.3	1	0.85
	1265	1	1.5	1	0
	1266	1	0		0
	1267	1	0		0.025
	1268	1	0		0.025
	1269	1	0		0
	1270	1	0		0
	1271	1	1.5	1	0
	1272	1	1.5	1	1
	1273	1	0		0
	1274	1	1.45	1	1
	1275	1	0.85	1	0.9
	1276	1	0		0
	1277	1	0		0
	1278	1	1.5	1	0.15
	1279	1	1.5	1	0
	1280	1	0		0
	1281	1	1.5	1	0.025
	1282	1	0		0
	1283	1	0		0.475
	1284	1	1.5	1	0
	1285	1	0		0.425
	1286	1	0		0.35
	1287	1	0		0
	1288	1	0		0
	1289	1	0		0
	1290	1	0		0
	1291	1	0		0
	1292	1	0		1
	1293	1	1.5	1	0
	1294	1	0		0
	1295	1	1.5	1	0
	1296	1	0		0.025
	1297	1	0		0.875
	1298	1	0		0.025
	1299	1	0		0
	1300	1	0		0
	1301	1	0		1
	1302	1	0		0
	1303	1	0		0
	1304	1	0		0
	1305	1	0		0.95
	1306	1	1.5	1	0.3
	1307	1	0		0
	1308	1	1.5	1	0.5
	1309	1	0		0.85
	1310	1	1.5	1	0
	1311	1	0		0.05
	1312	1	0		0
	1313	1	0		0
	1314	1	0		0
	1315	1	0		0
	1316	1	0		1
	1317	1	1.5	1	0
	1318	1	0		0
	1319	1	0		0
	1320	1	1.5	1	0
	1321	1	0		0
	1322	1	0		0
	1323	1	0		0
	1324	1	0		0
	1325	1	0		0.025
	1326	1	0		0.35
	1327	1	0		1
	1328	1	0		0
	1329	1	1.425	1	1
	1330	1	0		0
	1331	1	0		0.875
	1332	1	1.5	1	0
	1333	1	0		0
	1334	1	0		0.95
	1335	1	1.5	1	0.1
	1336	1	0		1
	1337	1	0		0
	1338	1	0		0
	1339	1	1.5	1	0.875
	1340	1	0		0
	1341	1	0		0
	1342	1	0		0
	1343	1	1.5	1	0
	1344	1	0		0
	1345	1	0		0
	1346	1	0		0
	1347	1	0		0
	1348	1	0		0
	1349	1	1.45	1	0
	1350	1	1.45	1	0
	1351	1	1.5	1	0.95
	1352	1	0		0.975
	1353	1	0		0.025
	1354	1	0		0
	1355	1	0		0
	1356	1	0		1
	1357	1	1.5	1	0
	1358	1	0		0
	1359	1	0		0
	1360	1	0		0.425
	1361	1	0		0
	1362	1	0		0.05
	1363	1	0		1
	1364	1	0		0
	1365	1	0		1
	1366	1	1.5	1	0.025
	1367	1	0		0.025
	1368	1	0		0
	1369	1	0		0
	1370	1	0		1
	1371	1	0		0.85
	1372	1	0		0.05
	1373	1	0		0
	1374	1	0		0.05
	1375	1	0		0
	1376	1	0		0
	1377	1	0		0
	1378	1	0		0.25
	1379	1	0		0.025
	1380	1	0		0
	1381	1	0		0.025
	1382	1	0		0
	1383	1	0		0
	1384	1	0		0
	1385	1	1.5	1	0
	1386	1	0		0
	1387	1	1.5	1	0
	1388	1	0		0
	1389	1	0		0.45
	1390	1	0		0
	1391	1	0		0
	1392	1	0		1
	1393	1	0		0
	1394	1	0		0.85
	1395	1	0		0
	1396	1	0		0.025
	1397	1	0		0.025
	1398	1	0		0
	1399	1	0		0
	1400	1	0		0
	1401	1	0		0
	1402	1	0		0
	1403	1	0		0
	1404	1	0		0
	1405	1	1.5	1	0
	1406	1	1.5	1	0
	1407	1	0		0
	1408	1	0		0
	1409	1	0		0.875
	1410	1	0		0.025
	1411	1	0		0
	1412	1	0		0
	1413	1	0		0
	1414	1	0		0
	1415	1	0		0
	1416	1	0		0
	1417	1	1.5	1	0
	1418	1	1.5	1	0
	1419	1	0		1
	1420	1	0		0.025
	1421	1	0		0.025
	1422	1	0		0
	1423	1	0		0.025
	1424	1	0		0.875
	1425	1	0		0
	1426	1	0		0.05
	1427	1	0		0.025
	1428	1	0		0
	1429	1	0		0.025
	1430	1	0		0.125
	1431	1	1.425	1	0
	1432	1	0		0
	1433	1	1.5	1	0.075
	1434	1	0		0.025
	1435	1	0		0
	1436	1	0		0
	1437	1	0		0
	1438	1	0		0
	1439	1	0		0.975
	1440	1	0		0.025
	1441	1	0		0
	1442	1	0		0
	1443	1	0		0
	1444	1	0		0
	1445	1	0		0
	1446	1	0		0
	1447	1	0		0
	1448	1	0		0
	1449	1	0		0.95
	1450	1	0		0.95
	1451	1	0		1
	1452	1	0		0.05
	1453	1	1.5	1	0.4
	1454	1	0		0
	1455	1	0		0.025
	1456	1	0		0
	1457	1	0		0
	1458	1	0		0
	1459	1	0		0.025
	1460	1	0		0.025
	1461	1	0		0
	1462	1	0		0
	1463	1	0		0
	1464	1	0		0
	1465	1	0		0
	1466	1	0		0
	1467	1	0		0
	1468	1	0		0.825
	1469	1	0		0
	1470	1	1.4	1	0
	1471	1	0		0
	1472	1	0		0
	1473	1	0		0
	1474	1	0		0.925
	1475	1	0		0
	1476	1	0		0
	1477	1	0		0
	1478	1	1.5	1	0
	1479	1	0		0
	1480	1	0		0
	1481	1	0		0
	1482	1	1.5	1	0
	1483	1	1.5	1	0
	1484	1	0		0.025
	1485	1	0		1
	1486	1	0		0
	1487	1	0		0.025
	1488	1	0		0
	1489	1	0		0
	1490	1	1.5	1	0
	1491	1	0		0.025
	1492	1	0		0.375
	1493	1	0		0
	1494	1	0		0
	1495	1	0		0.05
	1496	1	1.45	1	1
	1497	1	0		0
	1498	1	0		1
	1499	1	0		1
	1500	1	0		0.2
	1501	1	0		0
	1502	1	0		0
	1503	1	0		0.025
	1504	1	0		0.45
	1505	1	0		0
	1506	1	0		0.025
	1507	1	0		0.975
	1508	1	0		1
	1509	1	0		0.025
	1510	1	0		0
	1511	1	1.5	1	0.025
	1512	1	1.5	1	0.4
	1513	1	0		1
	1514	1	1.5	1	0
	1515	1	0		0
	1516	1	1.5	1	0
	1517	1	1.5	1	0
	1518	1	1.5	1	1
	1519	1	1.5	1	0
	1520	1	0		0
	1521	1	1.45	1	0.9
	1522	1	0		0
	1523	1	0		0.4
	1524	1	0		0
	1525	1	0		0
	1526	1	0.875	1	0
	1527	1	0		0.925
	1528	1	0		0
	1529	1	0		0.025
	1530	1	0		0
	1531	1	0		0
	1532	1	0		0
	1533	1	0		0.025
	1534	1	0		0
	1535	1	0		1
	1536	1	0		0
	1537	1	1.425	1	0.8
	1538	1	0		0.025
	1539	1	0		0
	1540	1	0		0.025
	1541	1	0		0
	1542	1	0		0
	1543	1	1.4	1	0
	1544	1	0		0.025
	1545	1	0		0
	1546	1	1.5	1	0
	1547	1	0		0.025
	1548	1	0		0
	1549	1	1.5	1	0.85
	1550	1	0		0.05
	1551	1	0		0
	1552	1	1.5	1	0
	1553	1	0		0
	1554	1	0		0
	1555	1	0		0
	1556	1	0		0
	1557	1	1.5	1	0
	1558	1	0		0.925
	1559	1	0		0.025
	1560	1	0		0.6
	1561	1	0		0
	1562	1	0		0
	1563	1	1.5	1	0
	1564	1	0		0
	1565	1	0		0
	1566	1	0		0.825
	1567	1	0		0
	1568	1	0		0.025
	1569	1	0		0.05
	1570	1	0		0
	1571	1	0		0.925
	1572	1	0		0
	1573	1	0		0
	1574	1	0		0
	1575	1	0		0
	1576	1	0		0
	1577	1	0		0
	1578	1	0		1
	1579	1	0		0.05
	1580	1	0		0
	1581	1	0		0
	1582	1	0		0
	1583	1	1.5	1	0
	1584	1	0		0
	1585	1	0		0.975
	1586	1	0		0
	1587	1	0		0.575
	1588	1	1.5	1	0
	1589	1	1.5	1	0
	1590	1	0		0
	1591	1	0		0
	1592	1	1.25	1	0
	1593	1	0		0
	1594	1	0		0
	1595	1	0		0.05
	1596	1	0		0
	1597	1	0		0.875
	1598	1	0		0.975
	1599	1	0		0
	1600	1	0		0
	1601	1	0		0.025
	1602	1	0		0
	1603	1	0		0.5
	1604	1	1.35	1	1
	1605	1	0		0.5
	1606	1	0		0.025
	1607	1	0		0
	1608	1	0		0
	1609	1	0		0.1
	1610	1	0		0
	1611	1	0		0
	1612	1	0		0
	1613	1	1.5	1	0
	1614	1	0		0
	1615	1	0		0.45
	1616	1	0		1
	1617	1	1.5	1	0
	1618	1	0		0
	1619	1	0		0
	1620	1	0		0
	1621	1	0		0
	1622	1	1.5	1	0
	1623	1	0		0.4
	1624	1	0		0
	1625	1	0		0.025
	1626	1	0		0
	1627	1	0		1
	1628	1	1.2	1	0
	1629	1	0		0
	1630	1	0		0.55
	1631	1	0		0
	1632	1	0		0
	1633	1	0		0.5
	1634	1	0		0
	1635	1	0		0.025
	1636	1	0		0
	1637	1	1.25	1	1
	1638	1	0		0
	1639	1	0		0.05
	1640	1	0		0
	1641	1	0		0
	1642	1	0		0
	1643	1	0		0.45
	1644	1	0		0
	1645	1	0		0
	1646	1	0		0
	1647	1	0		0
	1648	1	0		0.025
	1649	1	0		0
	1650	1	0		0.025
	1651	1	0		0
	1652	1	0		0
	1653	1	0		0
	1654	1	0		0
	1655	1	0		0
	1656	1	0		0
	1657	1	0		0.05
	1658	1	1.5	1	1
	1659	1	0		0
	1660	1	0		0
	1661	1	1.5	1	0
	1662	1	1.5	1	0.025
	1663	1	0		0
	1664	1	0		0
	1665	1	0		0
	1666	1	0		0
	1667	1	0		0
	1668	1	0		0.025
	1669	1	0		0.025
	1670	1	0		0
	1671	1	0		0
	1672	1	0		0
	1673	1	0		0.825
	1674	1	0		0
	1675	1	0		0
	1676	1	0		0.025
	1677	1	0		0.875
	1678	1	0		0
	1679	1	0		0
	1680	1	0		0
	1681	1	0		0
	1682	1	0		1
	1683	1	0		0
	1684	1	0		0
	1685	1	0		0
	1686	1	1.5	1	0.025
	1687	1	0		1
	1688	1	0		0
	1689	1	0		0
	1690	1	0		0.025
	1691	1	0		0.3
	1692	1	0		0
	1693	1	0		0.05
	1694	1	0		0
	1695	1	0		1
	1696	1	1.45	1	0
	1697	1	0		0.025
	1698	1	0		0.375
	1699	1	0		1
	1700	1	0		0
	1701	1	0		1
	1702	1	0		0
	1703	1	0		0
	1704	1	0		0.875
	1705	1	1.5	1	0.05
	1706	1	0		0
	1707	1	0		0.025
	1708	1	1.5	1	0.05
	1709	1	0		0
	1710	1	0		0.025
	1711	1	0		0.025
	1712	1	0		0
	1713	1	0		0
	1714	1	0		0
	1715	1	0		0
	1716	1	0		0
	1717	1	0		1
	1718	1	0		0
	1719	1	0		0
	1720	1	0		0
	1721	1	0		0
	1722	1	0		0
	1723	1	0		0
	1724	1	0		0
	1725	1	0		0.025
	1726	1	0		0
	1727	1	0		0
	1728	1	0		0
	1729	1	0		0
	1730	1	0		0
	1731	1	0		1
	1732	1	0		0
	1733	1	0		0.3
	1734	1	0		0
	1735	1	0		0
	1736	1	0		0.275
	1737	1	0		0
	1738	1	0		0
	1739	1	0		0
	1740	1	0		1
	1741	1	0		0
	1742	1	0		1
	1743	1	1.5	1	0
	1744	1	0		0
	1745	1	0		0
	1746	1	0		0
	1747	1	0		0.925
	1748	1	0		1
	1749	1	0		0
	1750	1	0		0
	1751	1	0		0.925
	1752	1	0		0
	1753	1	0		0
	1754	1	0		0
	1755	1	0		0
	1756	1	0		0.05
	1757	1	1.2	1	0
	1758	1	0		0
	1759	1	0		0.025
	1760	1	0		0
	1761	1	0		1
	1762	1	0		0.025
	1763	1	0		0
	1764	1	0		0
	1765	1	0		0
	1766	1	0		0.925
	1767	1	0		0
	1768	1	0		0
	1769	1	0		0
	1770	1	0		1
	1771	1	1.3	1	0.475
	1772	1	0		0
	1773	1	1.35	1	0.025
	1774	1	0		0
	1775	1	0		0
	1776	1	0		0
	1777	1	0		0.025
	1778	1	0		0.025
	1779	1	0		0
	1780	1	0		0
	1781	1	1.45	1	0
	1782	1	0		0
	1783	1	0		0.4
	1784	1	0		0
	1785	1	0		0
	1786	1	0		0
	1787	1	0		0
	1788	1	0		0.875
	1789	1	0		0
	1790	1	0		0
	1791	1	0		0
	1792	1	0		0
	1793	1	0		0.95
	1794	1	1.5	1	0
	1795	1	0		0.025
	1796	1	0		0.875
	1797	1	1.5	1	0
	1798	1	0		0
	1799	1	0		0.025
	1800	1	0		0.05
	1801	1	0		0
	1802	1	0		1
	1803	1	0		0
	1804	1	0		0
	1805	1	0		0
	1806	1	0		0
	1807	1	0		0.325
	1808	1	0		0
	1809	1	0		0.025
	1810	1	0		0
	1811	1	0		0
	1812	1	0		1
	1813	1	0		0
	1814	1	0		0
	1815	1	0		1
	1816	1	0		0
	1817	1	0		0
	1818	1	0		0
	1819	1	0		0
	1820	1	0		0.2
	1821	1	0		0
	1822	1	1.5	1	0.975
	1823	1	0		0
	1824	1	1.45	1	0
	1825	1	0		0
	1826	1	0		0.25
	1827	1	0		0
	1828	1	0		0
	1829	1	0		0
	1830	1	0		0
	1831	1	0		0
	1832	1	0		0.275
	1833	1	0		0
	1834	1	0		1
	1835	1	0		0
	1836	1	0		0
	1837	1	0		0
	1838	1	0		0
	1839	1	0		0
	1840	1	0		0.025
	1841	1	0		0.5
	1842	1	0		0.95
	1843	1	0		0.05
	1844	1	0		0.4
	1845	1	1.325	1	0.975
	1846	1	0		0.35
	1847	1	1.5	1	0
	1848	1	0		1
	1849	1	0		0
	1850	1	1.3	1	0
	1851	1	0		0
	1852	1	0		1
	1853	1	0		0
	1854	1	0		0
	1855	1	0		0
	1856	1	0		0.025
	1857	1	0		0
	1858	1	0		0
	1859	1	0		1
	1860	1	0		0
	1861	1	0		0.875
	1862	1	0		0
	1863	1	0		1
	1864	1	0		0.025
	1865	1	0		0
	1866	1	0		0.425
	1867	1	0		0.975
	1868	1	1.45	1	0
	1869	1	0		1
	1870	1	0		1
	1871	1	0		0
	1872	1	0		0
	1873	1	0		0
	1874	1	0		0.1
	1875	1	0		0.025
	1876	1	0		0.9
	1877	1	0		0.05
	1878	1	0		0.975
	1879	1	0		0.05
	1880	1	0		0
	1881	1	0		0
	1882	1	0		0.025
	1883	1	0		0
	1884	1	0		0
	1885	1	0		0
	1886	1	0		0
	1887	1	0		0.1
	1888	1	0		0
	1889	1	0		1
	1890	1	0		0.075
	1891	1	0		0
	1892	1	0		0
	1893	1	0		0.025
	1894	1	0		0.475
	1895	1	0		0
	1896	1	0		0.45
	1897	1	0		0
	1898	1	0		0.15
	1899	1	0		1
	1900	1	0		0
	1901	1	0		0.025
	1902	1	0		0
	1903	1	1.5	1	0
	1904	1	0		0.5
	1905	1	0		0
	1906	1	0		0.05
	1907	1	0		0
	1908	1	0		0
	1909	1	1.45	1	0.05
	1910	1	1.25	1	0.025
	1911	1	0		0
	1912	1	1.475	1	0
	1913	1	0		0
	1914	1	0		0
	1915	1	0		0
	1916	1	0		0.325
	1917	1	0		0
	1918	1	1.5	1	0.35
	1919	1	0		0
	1920	1	0		0
	1921	1	0		0
	1922	1	0		0.275
	1923	1	0		0
	1924	1	0		0
	1925	1	1.5	1	0
	1926	1	1.475	1	0.05
	1927	1	0		0.35
	1928	1	0		0
	1929	1	0		0
	1930	1	0		0
	1931	1	0		1
	1932	1	0		0
	1933	1	1.5	1	0.875
	1934	1	1.375	1	0
	1935	1	0		0
	1936	1	0		0
	1937	1	0		0.025
	1938	1	0		0.975
	1939	1	0		0.2
	1940	1	0		0
	1941	1	0		0.475
	1942	1	0		0
	1943	1	0		0
	1944	1	1.35	1	0.925
	1945	1	0		0.025
	1946	1	0		0
	1947	1	0		0
	1948	1	1.425	1	0
	1949	1	0		0
	1950	1	0		0
	1951	1	0		0.8
	1952	1	0		0.025
	1953	1	1.5	1	0
	1954	1	0		0
	1955	1	1.5	1	0
	1956	1	0		0
	1957	1	0		0
	1958	1	1.45	1	0
	1959	1	0		0
	1960	1	0		0
	1961	1	0		0.425
	1962	1	0		0
	1963	1	0		0
	1964	1	0		0
	1965	1	0		0.325
	1966	1	0		0.075
	1967	1	0		0
	1968	1	0		0.075
	1969	1	0		0
	1970	1	0		1
	1971	1	0		0
	1972	1	0		0.05
	1973	1	0		0
	1974	1	0		0.425
	1975	1	0		0
	1976	1	0		0
	1977	1	0		0
	1978	1	0		0.85
	1979	1	1.5	1	0
	1980	1	0		0
	1981	1	0		0
	1982	1	0		0.1
	1983	1	0		0
	1984	1	0		0.025
	1985	1	0		1
	1986	1	0		0.425
	1987	1	0		1
	1988	1	0		0.925
	1989	1	0		0
	1990	1	0		0
	1991	1	0		0
	1992	1	0		0
	1993	1	0		0
	1994	1	0		0
	1995	1	0		0
	1996	1	0		0.05
	1997	1	0		0.025
	1998	1	0		0.025
	1999	1	0		0
	2000	1	0		0

## Sheet: ov_v_co_endo_lcq1
1	2	3	4	5	6	7	8	9	10	11	12	13	14	15	16	17	18	19	20	21	22	23	24	25	26	27	28	29	30	31	32	33	34	35	36	37	38	39	40	41	42	43	44	45	46	47	48	49	50
Ovarian Cancer Stages I, N=16; II, N=5; III,N=12; IV,N=2	Ovarian Cancer Stages I, N=16; II, N=5; III,N=12; IV,N=2	Ovarian Cancer Stages I, N=16; II, N=5; III,N=12; IV,N=2	Ovarian Cancer Stages I, N=16; II, N=5; III,N=12; IV,N=2	Ovarian Cancer Stages I, N=16; II, N=5; III,N=12; IV,N=2	Ovarian Cancer Stages I, N=16; II, N=5; III,N=12; IV,N=2	Ovarian Cancer Stages I, N=16; II, N=5; III,N=12; IV,N=2	Ovarian Cancer Stages I, N=16; II, N=5; III,N=12; IV,N=2	Ovarian Cancer Stages I, N=16; II, N=5; III,N=12; IV,N=2	Ovarian Cancer Stages I, N=16; II, N=5; III,N=12; IV,N=2	Ovarian Cancer Stages I, N=16; II, N=5; III,N=12; IV,N=2	Ovarian Cancer Stages I, N=16; II, N=5; III,N=12; IV,N=2	Ovarian Cancer Stages I, N=16; II, N=5; III,N=12; IV,N=2	Ovarian Cancer Stages I, N=16; II, N=5; III,N=12; IV,N=2	Ovarian Cancer Stages I, N=16; II, N=5; III,N=12; IV,N=2	Ovarian Cancer Stages I, N=16; II, N=5; III,N=12; IV,N=2	Ovarian Cancer Stages I, N=16; II, N=5; III,N=12; IV,N=2	Ovarian Cancer Stages I, N=16; II, N=5; III,N=12; IV,N=2	Ovarian Cancer Stages I, N=16; II, N=5; III,N=12; IV,N=2	Ovarian Cancer Stages I, N=16; II, N=5; III,N=12; IV,N=2	Ovarian Cancer Stages I, N=16; II, N=5; III,N=12; IV,N=2	Ovarian Cancer Stages I, N=16; II, N=5; III,N=12; IV,N=2	Ovarian Cancer Stages I, N=16; II, N=5; III,N=12; IV,N=2	Ovarian Cancer Stages I, N=16; II, N=5; III,N=12; IV,N=2	Ovarian Cancer Stages I, N=16; II, N=5; III,N=12; IV,N=2	Ovarian Cancer Stages I, N=16; II, N=5; III,N=12; IV,N=2	Ovarian Cancer Stages I, N=16; II, N=5; III,N=12; IV,N=2	Ovarian Cancer Stages I, N=16; II, N=5; III,N=12; IV,N=2	Ovarian Cancer Stages I, N=16; II, N=5; III,N=12; IV,N=2	Ovarian Cancer Stages I, N=16; II, N=5; III,N=12; IV,N=2	Ovarian Cancer Stages I, N=16; II, N=5; III,N=12; IV,N=2	Ovarian Cancer Stages I, N=16; II, N=5; III,N=12; IV,N=2	Ovarian Cancer Stages I, N=16; II, N=5; III,N=12; IV,N=2	Ovarian Cancer Stages I, N=16; II, N=5; III,N=12; IV,N=2	Endometrial Cancer Stages I, N=19; II, N=1; III, N=19; IV, N=1	Endometrial Cancer Stages I, N=19; II, N=1; III, N=19; IV, N=1	Endometrial Cancer Stages I, N=19; II, N=1; III, N=19; IV, N=1	Endometrial Cancer Stages I, N=19; II, N=1; III, N=19; IV, N=1	Endometrial Cancer Stages I, N=19; II, N=1; III, N=19; IV, N=1	Endometrial Cancer Stages I, N=19; II, N=1; III, N=19; IV, N=1	Endometrial Cancer Stages I, N=19; II, N=1; III, N=19; IV, N=1	Endometrial Cancer Stages I, N=19; II, N=1; III, N=19; IV, N=1	Endometrial Cancer Stages I, N=19; II, N=1; III, N=19; IV, N=1	Endometrial Cancer Stages I, N=19; II, N=1; III, N=19; IV, N=1	Endometrial Cancer Stages I, N=19; II, N=1; III, N=19; IV, N=1	Endometrial Cancer Stages I, N=19; II, N=1; III, N=19; IV, N=1	Endometrial Cancer Stages I, N=19; II, N=1; III, N=19; IV, N=1	Endometrial Cancer Stages I, N=19; II, N=1; III, N=19; IV, N=1	Endometrial Cancer Stages I, N=19; II, N=1; III, N=19; IV, N=1	Endometrial Cancer Stages I, N=19; II, N=1; III, N=19; IV, N=1
0	0	0	0	0	0	0	0	0	0	0	0	0	0	0	0	0	0	0	0	0	0	0	0	0	0	0	0	0	0	0	0	0	0	0	0	0	0	0	0	0	0	0	0	0	0	0	0	0	0
0	0	0	0	0	0	0	0	13.153	6.72322	0	0	0	0	0	0	0	0	0	0	0	0	0	0	7.88863	0	0	0	0	0	0	0	0	0	0	0	0	0	0	0	0	0	0	30.9988	28.0009	31.1593	17.4484	22.9046	0	0
0	24.6376	0	0	23.9598	0	0	31.6297	19.2903	0	18.7303	9.69577	39.9719	62.3579	0	7.08881	56.7941	20.9847	39.9004	31.26	0	10.1127	0	0	10.6712	0	8.03886	13.9824	12.2028	0	0	8.14511	6.72017	7.45257	29.3528	25.682	24.2728	0	33.3333	0	11.6076	0	0	0	0	33.3333	0	0	29.4276	0
15.0139	0	26.2278	9.84228	33.3333	15.1093	19.7358	9.46268	0	16.8794	13.9981	36.9524	33.3333	0	81.1786	27.9128	0	0	0	14.2967	33.3333	33.3333	0	27.4441	0	15.7889	12.733	0	12.6793	12.6689	0	0	32.649	15.107	0	19.9365	0	0	0	70.5334	0	0	0	0	0	0	0	19.4386	0	29.6163
0	28.4104	33.3333	40.6549	0	0	26.6155	0	0	0	0	0	0	0	0	0	0	21.1506	17.9515	0	0	33.3333	0	0	0	0	0	0	21.6542	30.7234	17.423	19.4434	0	0	0	0	0	0	0	0	33.3333	15.1029	33.3333	21.6241	0	0	0	0	33.3333	21.7703
10.3602	0	7.93167	0	14.9606	0	0	7.24044	0	23.1625	0	0	0	0	0	0	0	22.1568	0	0	16.6519	0	9.43328	19.7618	28.2244	22.0682	0	16.3447	0	0	56.5006	0	0	0	33.3333	0	6.32841	49.2481	27.6734	0	21.7257	33.3333	33.3333	4.65549	0	0	3.6776	28.9076	0	33.3333
16.384	34.9843	0	23.491	9.37357	24.7475	34.6663	0	34.2233	26.6101	60.9696	46.0618	0	9.9082	0	48.9491	0	0	0	19.0366	0	0	33.3333	0	40.1973	0	25.2945	14.3229	0	0	0	0	26.6132	18.2264	0	7.65135	33.3333	0	0	0	0	33.3333	6.68457	0	0	0	15.2047	0	11.7502	3.71706
41.2925	0	0	0	18.3728	42.1562	0	11.1299	33.3333	16.4539	0	0	26.6947	0	3.34337	0	0	0	26.4411	26.3218	16.6815	17.3916	57.2334	46.9049	0	50.8777	53.9337	50.322	20.654	56.6076	15.9103	47.2233	34.0177	33.3333	33.3333	33.3333	0	0	33.3333	10.0376	33.3333	0	0	2.3345	38.6657	0	0	0	3.90571	0
0	0	32.5072	26.0118	0	0	0	0	0	0	0	0	0	11.5579	0	0	0	23.5252	15.7071	0	33.3333	0	0	0	5.10896	0	0	0	21.1306	0	10.1661	25.1882	0	0	0	13.3969	2.73209	33.3333	5.65992	0	0	0	0	28.6778	0	33.3333	0	7.81936	0	11.563
16.9493	11.9677	0	0	0	17.987	18.9825	40.5373	0	10.1708	6.30203	7.29	0	16.176	15.4781	16.0494	43.2059	12.1827	0	9.08481	0	5.82905	0	5.88928	7.90945	11.2652	0	5.02804	11.6791	0	0	0	0	25.8808	3.98052	0	0	17.4185	0	19.429	0	18.2304	26.6488	11.7092	33.3333	2.17405	63.6694	20.9298	21.5832	0
0	0	0	0	0	0	0	0	0	4.66783	0	0	0	13.4058	5.69501	0	0	0	5.06552	0	0	33.3333	0	0	0	0	0	0	0	0	0	0	0	0	0	0	45.515	23.0072	0	3.05783	21.0834	0	11.223	0	12.9894	17.2291	0	0	19.5557	0
46.6129	0	15.8211	0	9.89889	0	0	8.9595	0	4.19605	0	0	5.71586	0	0	0	0	0	0	0	24.8311	0	7.1288	4.61301	3.32339	0	14.8619	12.3337	0	12.6223	14.6485	7.8054	0	0	20.7895	0	0	0	0	0	0	16.0988	0	11.0397	0	0	0	0	0	38.2963
0	0	0	48.2055	27.8958	0	0	11.0522	0	0	21.7408	21.6775	0	0	0	0	18.7508	10.0959	6.90079	27.3685	15.702	0	21.2561	0	16.9083	9.75544	0	16.6327	19.864	0	0	0	40.4153	7.4059	12.5301	12.9351	12.2294	11.8763	17.3782	0	21.7081	0	25.2442	26.9592	24.916	0	0	0	0	0
10.907	7.28449	5.73948	23.8055	23.4344	23.5353	13.0384	0	26.4432	0	21.8997	33.3333	0	0	31.0963	57.1571	0	54.2781	0	0	16.5379	6.68374	0	10.4228	7.8658	21.7278	2.65764	0	0	15.1459	0	0	12.743	11.7966	16.3075	28.929	0	25.2936	45.8049	14.0527	11.42	13.8205	9.03541	23.5825	33.3333	30.56	0	26.57	14.2629	0
0	0	0	0	0	33.3333	33.3333	0	33.3333	0	0	0	49.1651	0	0	0	0	0	32.9618	15.6263	8.50225	0	0	0	0	0	0	0	0	9.78223	0	0	0	0	11.4922	0	0	0	0	33.3333	0	17.4761	0	0	0	21.3333	33.3333	45.4603	0	0
0	33.2315	10.974	0	0	33.3333	45.1552	0	18.095	21.0859	13.8184	10.876	0	0	33.3333	33.3333	0	0	0	0	0	0	21.7547	10.1515	41.8926	0	22.923	28.2093	11.2602	0	18.3128	0	0	0	0	14.0238	18.2333	0	0	0	0	0	0	22.2936	20.3439	0	33.3333	0	17.2912	47.9856
22.4263	0	7.41387	18.4611	0	0	0	0	0	52.2567	0	15.94	0	53.2609	0	0	0	12.3885	0	0	0	0	13.2116	26.3725	0	25.2972	0	33.3333	53.9752	0	0	92.1946	20.1955	0	17.0258	0	0	0	15.9552	25.9764	14.7313	23.344	0	6.37415	0	0	0	6.76329	0	13.7181
20.0538	15.0846	49.9532	9.5278	0	9.79806	0	38.9478	22.1285	0	23.0262	0	39.65	33.3333	29.8753	9.5096	81.2492	23.2374	6.12094	9.69293	16.7954	33.3333	23.6559	48.4402	30.0099	0	33.3333	0	0	62.4496	48.4425	0	0	66.3616	12.5438	37.7377	24.0223	21.457	0	0	11.6252	0	23.6862	0	0	18.8776	0	0	15.9764	0
0	44.3994	0	0	16.5301	0	8.47306	0	0	0	19.5149	0	0	0	0	0	0	0	0	47.3122	17.6314	0	0	0	0	19.6417	0	0	0	0	18.5963	0	0	0	0	0	0	0	20.8618	0	0	0	0	0	8.41738	0	0	0	14.9638	0
0	0	10.0983	0	22.2408	0	0	41.0405	0	17.7935	0	18.1731	5.46899	0	0	0	0	0	48.9509	0	0	26.6496	12.9929	0	0	23.5779	26.2242	9.4909	14.9006	0	0	0	26.6462	14.4359	9.31107	6.37444	0	18.3658	0	23.5798	19.432	29.2606	30.8111	9.7508	0	12	33.3333	21.2064	17.95	0
9.24949	0	8.37117	9.27719	0	10.9769	0	0	14.3164	0	4.87652	12.1032	0	0	19.0977	0	0	32.1452	0	9.44503	0	19.4835	3.48828	0	15.9838	0	0	14.4056	0	0	0	0	0	0	25.2876	22.2306	0	0	7.29814	20.1227	5.73456	8.58474	0	40.0594	32.1233	26.5602	13.9837	12.3177	10.379	0
0	8.05712	2.17972	28.8187	17.119	30.6217	50.9808	18.728	0	14.5762	18.7866	21.9727	26.1901	37.1873	15.5976	0	30.3471	0	0	0	16.6573	0	6.26227	9.4529	30.8098	8.45249	0	0	0	4.3104	11.7972	7.96176	0	0	0	0	17.1171	0	5.9744	0	7.50377	0	0	0	0	8.49708	4.61808	3.80665	0	49.3564
0	0	0	0	9.73442	0	0	0	0	0	0	0	22.8464	0	0	16.6757	0	0	0	0	0	10.9805	0	0	0	0	0	0	55.4354	10.0952	12.7603	0	0	0	0	33.3333	26.8696	23.9837	0	0	0	0	0	0	17.329	0	33.3333	0	33.3333	0
0	17.6724	0	0	0	0	0	27.5669	16.3603	10.3569	0	0	0	27.6621	23.243	17.4035	0	0	0	0	0	0	0	0	0	0	0	24.5651	0	0	0	0	28.1153	0	44.2161	0	0	2.96296	0	14.8386	0	12.7668	34.7685	12.8762	0	0	0	0	0	0
0	31.5381	0	29.5262	0	12.3062	7.20149	0	0	29.792	17.6505	0	0	5.61154	0	14.9024	0	7.85793	22.3048	44.8667	28.3659	0	0	33.3333	9.40612	30.949	100	0	33.3333	40.7373	37.1191	17.1705	40.5831	39.6746	0	23.2771	0	0	15.5625	39.7866	23.3276	14.0177	0	21.512	0	23.1665	10.2648	0	33.3333	10.4968
77.3179	0	59.3269	11.1732	31.1783	19.8869	0	31.272	14.9727	18.7572	30.2296	25.1065	23.7364	0	14.2356	0	44.7632	12.5758	33.3333	0	54.9768	5.2633	63.5701	32.42	22.9471	46.7747	0	0	0	14.8767	0	58.7049	0	21.3711	22.4901	11.1027	23.9264	9.34959	47.4752	0	0	15.5878	0	0	12.8158	6.77312	0	9.93958	0	0
0	0	0	0	18.0811	0	0	0	0	0	28.4568	13.5357	0	5.67126	0	0	0	21.2468	0	0	0	22.3528	0	0	12.9097	0	0	52.2611	11.2312	0	20.5731	0	0	0	3.37778	0	16.2162	30.3704	0	0	0	0	20.9004	0	12.5035	24.8363	19.3497	20.5025	0	0
0	0	0	0	0	0	33.2435	22.4331	37.3775	22.9764	0	0	7.14322	8.82846	10.0904	35.0886	0	11.82	22.2508	0	0	0	0	17.8337	0	0	0	8.76826	0	0	9.35843	0	31.3016	38.9543	4.62839	0	0	5.7226	0	20.449	20.0603	20.5666	0	7.25897	18.3174	0	0	0	0	22.0157
0	9.54007	0	21.2047	15.3115	26.2083	8.57422	0	16.973	3.54129	0	19.5874	20.0839	15.0394	17.7357	15.9298	0	0	22.111	45.6882	0	8.58648	0	6.96011	7.94343	0	0	0	0	22.1329	8.3919	0	0	0	0	10.0563	15.8707	0	0	4.80307	0	0	17.1452	18.2934	3.18854	10.1669	0	0	22.9543	7.42097
13.4326	33.1923	30.1222	0	8.5756	0	0	0	0	0	0	7.69439	0	0	0	0	24.8896	14.3542	0	0	0	33.3333	26.6794	0	0	13.8238	0	0	0	7.84744	0	16.1629	0	0	0	0	0	27.6107	23.6898	0	10.0404	28.4765	27.1858	0	3.72258	0	18.4504	53.4336	0	10.7102
3.05794	0	0	0	0	0	0	0	9.34564	0	10.7267	0	9.22794	13.9024	0	0	0	0	0	0	3.44598	0	0	0	21.8926	0	14.1628	13.9752	0	0	0	8.6212	0	12.9091	16.2867	25.4291	28.4992	0	0	55.4888	27.9196	0	0	0	0	23.1322	0	0	25.3871	19.1652
0	0	0	0	0	0	19.9312	10.2765	0	0	0	0	33.3333	22.2795	32.6442	0	0	0	13.45	8.50473	2.62672	0	0	0	0	0	0	0	0	0	0	0	10.8024	0	33.3333	0	0	14.4817	0	0	0	0	0	20.4913	11.0482	39.1057	0	0	0	0
0	0	0	0	0	0	0	0	0	0	0	0	0	0	0	0	0	6.81249	0	0	0	0	0	0	0	0	0	3.29401	0	0	0	0	0	33.3333	0	4.6657	0	30.7198	33.3333	26.3037	0	0	24.1502	0	0	0	20.0078	0	0	0
0	57.1665	57.3017	24.4876	0	23.5195	53.1102	42.134	52.574	57.0556	29.9918	33.3333	33.3333	0	21.2408	59.6862	100	14.1134	22.7888	0	17.2716	0	33.3333	0	38.9558	89.4514	0	33.3333	49.8307	0	33.3333	33.5041	29.9899	33.3333	19.8135	11.9768	0	33.3333	48.5413	9.46502	31.7185	50.6167	21.7514	16.3898	6.64256	0	0	0	54.2959	17.1758
96.9421	33.3333	33.3333	60.1553	91.5123	53.6086	22.9004	0	14.857	26.5553	55.94	54.8383	15.6608	46.0507	28.2497	22.6024	0	33.3333	35.4172	67.6532	60.594	98.5274	50.0214	100	18.6873	0	71.7933	0	0	100	64.4618	9.23466	39.7142	9.26719	0	17.4647	21.6478	0	0	0	0	19.2626	19.4003	39.2518	0	0	43.5935	56.7108	7.94621	14.9209
0	0	0	0	0	0	0	39.7235	0	0	0	0	0	0	17.8653	0	0	0	0	0	0	0	0	0	0	0	0	7.11155	0	0	0	0	0	0	0	21.8134	0	0	0	0	0	0	0	0	40.7215	0	0	0	0	0
0	0	0	0	0	0	0	0	0	0	0	0	0	0	0	0	0	0	0	0	12.7486	0	0	0	8.74214	0	0	0	0	0	0	0	0	0	0	11.796	17.0882	18.8516	0	7.02965	5.41377	0	0	0	12.6221	15.0694	0	33.3333	8.85013	30.3256
0	9.50021	0	15.3571	8.48771	9.81387	0	7.866	23.2234	0	0	0	0	0	0	0	0	26.5208	24.2119	0	0	1.47264	0	0	0	0	0	0	45.365	0	0	33.1625	0	11.157	13.5198	0	10.6421	0	0	1.71282	9.16852	14.0708	20.7651	6.92351	0	0	13.3255	0	0	0
0	0	9.36499	0	0	13.058	4.05831	0	0	9.61104	3.34156	11.8284	8.4446	17.7674	0	10.7309	0	19.2199	4.13202	7.34031	0	0	0	0	5.99561	0	14.0439	19.3581	4.80422	0	0	0	3.34344	0	0	0	22.1227	2.61351	0	0	25.7797	0	13.933	16.9435	0	12.4915	0	9.95589	0	18.4124
0	0	0	0	0	0	0	0	0	6.77802	0	0	0	0	0	6.98047	0	0	0	16.5018	3.31317	0	16.6453	0	5.72656	10.5486	0	22.9278	0	0	2.20487	15.4775	16.1501	0	17.0467	6.85426	0	0	18.1254	0	0	16.05	0	0	28.9657	10.2011	23.0732	0	3.52067	0
13.6841	0	8.72261	0	13.5435	0	0	0	0	0	0	0	0	0	0	0	0	0	0	0	0	2.21098	0	11.6511	9.43775	8.86258	9.49001	0	0	29.1059	0	0	14.0332	0	10.266	0	7.00494	0	14.9385	43.8302	0	28.4346	0	0.950252	0	0	0	0	13.346	16.2069
17.3548	10.6372	15.2485	27.2155	0	29.7669	7.5059	0	38.9559	0	7.52525	16.6901	14.4596	28.4271	23.3722	0	45.4765	0	33.7796	0	6.08079	39.1107	0	12.7023	6.34478	17.5083	16.1773	7.48002	11.4119	7.2037	3.7961	21.0058	0	34.4045	0	19.3029	0	0	15.5568	0	18.3333	0	0	0	6.12883	24.2772	0	16.6236	0	0
0	0	0	0	10.2804	26.806	24.2404	0	0	18.564	6.72314	15.8137	11.0407	24.293	22.0497	39.4939	0	0	0	9.713	21.3146	0	0	0	12.8972	0	0	4.14152	24.0619	0	13.7936	0	33.3333	10.1402	0	29.5592	0	3.44019	0	0	0	0	22.5716	43.8421	0	4.98442	73.3459	15.5928	20.1973	5.58943
0	42.9358	14.3689	0	0	0	0	0	0	22.2952	16.6907	0	17.4921	0	0	0	54.5235	54.1096	0	0	15.4412	0	0	0	0	16.5593	18.2041	0	0	0	0	9.90958	0	0	8.98936	33.3333	26.3702	0	13.5479	10.4755	0	12.2551	17.8538	0	5.1425	0	0	0	23.1229	0
49.9793	0	0	25.4369	19.2696	0	0	0	0	21.4421	12.812	17.061	0	0	10.3905	0	0	0	11.6941	0	0	0	14.9715	0	11.5391	10.604	21.3301	7.01547	0	14.3287	18.8426	26.1301	0	0	26.2731	0	15.851	20.4017	0	39.9733	39.3067	0	0	0	0	10.2294	0	0	0	0
0	4.81327	39.1952	4.68961	15.1028	0	0	69.4718	26.8272	0	19.472	34.1628	41.1664	33.9258	20.8816	13.8874	0	9.74977	0	19.6735	16.5915	22.6187	0	44.7518	0	0	2.94849	0	38.4041	25.5615	33.3333	0	4.782	11.4859	15.9146	0	17.5273	16.5817	18.3948	0	0	11.22	21.1533	0	0	0	5.36341	12.6834	0	35.6331
0	0	0	0	23.0529	0	36.3544	0	0	0	0	0	15.8412	0	0	20.1681	0	0	39.4723	0	12.0187	31.1224	33.3333	0	35.3719	0	0	29.1918	0	0	19.5398	23.4238	0	23.1932	0	0	0	29.8931	17.7765	0	15	0	0	20.8492	0	35.2263	0	0	10.2104	27.3819
0	22.6962	10.2418	0	14.0638	0	0	19.7108	14.4168	14.7693	16.6426	0	0	9.04034	12.0223	14.443	0	0	0	37.2802	17.8922	4.93723	41.4452	14.2968	0	29.6918	0	0	19.7057	11.8009	0	0	19.3001	15.8588	21.1382	0	17.4823	16.7517	0	0	0	0	16.5102	0	88.7287	0	21.2907	17.7405	33.1233	0
18.9818	11.8575	12.223	34.7616	0	21.4412	0	0	13.5609	11.0381	0	0	0	0	0	0	0	23.5836	5.93866	33.3333	10.6611	0	0	12.8312	15.4494	16.774	14.2075	52.1712	0	0	0	11.3302	28.5513	0	0	0	0	0	0	0	0	27.012	0	15.2786	0	20.1545	0	0	0	0
0	7.06015	0	7.89639	4.68706	21.9858	31.8992	10.8174	6.23916	11.8912	20.1343	16.2724	0	4.3138	11.2836	12.0076	0	12.5571	9.11522	0	0	0	10.25	3.7668	8.95984	0	17.6424	0	6.41651	11.9992	10.6946	8.20056	0	4.91745	17.4187	17.8046	15.7642	12.9316	19.7855	5.72093	27.36	21.0783	21.9112	19.0798	0	5.12821	0	37.3596	0	15.1886
0	0	0	0	0	0	4.93711	0	0	0	0	0	0	0	0	0	23.6385	0	0	0	0	4.11662	0	0	0	0	0	0	0	0	0	0	11.1424	0	13.9348	0	0	0	10.2619	6.17882	37.399	0	0	0	0	3.12589	18.6895	0	13.652	7.31183
0	0	0	0	0	0	0	0	0	0	0	0	0	0	0	0	0	0	0	0	0	0	0	0	0	0	0	0	0	0	0	17.2338	0	0	0	0	0	37.525	33.3333	0	0	0	22.9318	0	44.318	0	22.052	0	18.2214	0
0	0	0	33.3333	0	8.44474	0	0	35.7707	0	0	0	33.3333	41.8011	0	0	0	0	15.0028	33.3333	25.8768	0	0	0	0	0	33.3333	16.1947	0	0	0	0	0	14.5963	0	0	31.1758	12.2432	0	23.2409	0	9.84018	0	20.7695	18.2575	12.3046	15.7149	0	0	23.6985
75.9784	88.1711	75.4752	24.3096	66.6667	16.7552	59.9617	46.2429	22.2337	66.0631	70.9066	72.678	32.4318	14.2715	64.2501	19.5873	41.2629	51.9466	26.2238	29.9464	49.8691	65.4051	39.7202	55.8941	77.7077	77.2964	21.6932	43.7246	58.606	93.2979	61.6157	27.628	32.3373	52.6344	31.6564	0	13.3941	0	27.8482	0	16.2136	0	16.6961	15.9167	4.29399	39.4499	0	24.9894	48.5727	0
0	0	0	13.4695	24.3428	19.2793	0	0	0	0	0	0	0	0	0	0	0	0	0	0	0	0	14.8353	0	0	0	22.4956	0	0	0	0	16.0996	22.4587	0	0	55.8423	0	0	0	0	15.943	0	0	0	0	0	0	33.3333	0	0
0	0	0	0	0	0	0	0	7.57324	0	0	0	0	0	0	9.47421	0	0	0	0	0	0	0	0	0	9.39398	0	8.47805	0	0	0	0	0	0	0	19.9075	0	9.21492	0	19.1733	0	0	0	0	0	0	37.8626	19.1822	0	26.8075
0	0	0	0	0	0	16.6034	0	0	0	0	0	6.1922	0	21.3344	18.3296	0	18.2555	6.81947	0	0	0	26.9465	0	0	0	0	0	0	0	14.5545	0	0	0	10.7582	0	19.9392	5.50579	17.393	0	9.80013	33.3333	23.5963	17.4166	18.0547	5.24297	0	4.3515	19.5539	0
5.32825	0	0	9.02374	0	0	12.2873	35.4731	6.37504	0	14.0342	0	0	0	0	22.2913	0	0	0	0	24.2541	5.88047	0	0	9.50789	0	22.4779	0	0	6.7021	6.69967	0	23.1185	18.7371	19.0843	0	13.4772	21.0901	0	28.2946	0	0	26.3743	0	15.0758	16.9635	0	0	0	0
0	0	24.5248	19.8638	8.9905	0	6.21045	0	11.0996	33.9369	15.0592	0	0	0	0	0	0	15.3299	26.7881	0	0	13.5326	18.498	17.0247	4.50355	13.3096	0	31.6027	41.394	0	0	17.6967	10.9431	14.0322	0	0	22.0137	0	0	0	20.6443	56.8265	10.4015	33.3333	0	0	5.68104	0	0	0
18.6934	11.8289	0	0	0	55.5208	0	18.284	16.9477	0	0	27.322	28.0426	43.9275	14.4155	30.3176	35.0986	14.468	25.1658	36.7203	0	11.0652	0	27.0812	8.28084	0	0	0	0	0	17.1302	21.342	0	0	24.5663	24.2502	0	14.4209	11.1636	23.1123	0	0	0	12.5639	0	22.9131	0	18.1435	0	42.1822
17.752	0	0	7.04423	0	0	6.16121	0	6.49885	8.98667	0	0	13.3718	0	27.1688	0	0	12.9672	0	0	13.3495	0	0	0	0	15.0668	0	0	0	22.2907	0	0	9.53506	0	0	0	0	31.5012	46.9316	17.7372	19.4987	0	0	0	21.25	0	8.01203	12.3395	31.2178	0
9.93187	18.4511	25.391	29.7402	27.7411	0	0	0	8.81268	8.88671	21.3309	66.1692	0	25.0178	0	0	0	11.286	0	14.989	17.6812	0	41.6673	11.4522	14.0222	8.61267	18.2035	23.5146	0	0	8.9053	38.0105	11.4624	48.0437	0	0	11.6453	0	0	0	38.5023	25.7418	13.5945	0	0	0	0	15.1088	0	0
0	0	0	0	0	0	0	0	0	0	7.02459	0	6.66375	0	0	0	0	0	0	0	0	23.7087	0	0	16.2996	0	0	19.6575	21.1955	26.6648	16.8086	23.2417	6.87135	0	0	19.1505	0	0	0	0	0	0	22.7008	60.0677	9.01804	45.0339	35.2315	0	0	0
0	32.0495	0	0	0	30.7624	0	0	10.4393	33.3333	0	0	0	0	14.1172	12.2665	0	0	0	22.3856	12.0004	18.8945	0	21.8812	16.8826	0	33.3333	0	0	0	19.1552	0	0	0	31.7608	0	0	0	13.6037	0	0	17.2681	9.87336	0	0	0	0	0	0	0
0	0	0	25.2958	11.764	7.93869	46.9947	0	0	24.5132	19.5218	0	0	23.0596	0	15.2018	36.0613	0	0	11.3333	0	0	0	59.1318	0	8.848	0	0	0	33.3333	11.6822	0	0	0	0	50.7141	0	0	12.7182	8.64344	13.8346	0	0	0	0	0	0	16.9528	11.6835	66.6667
50.9085	9.89878	0	0	33.3333	0	0	86.2209	0	0	0	0	0	0	14.7637	0	0	41.8813	0	0	27.1691	33.3333	0	0	0	47.9091	0	20.6678	0	0	0	0	0	11.2363	19.9973	0	56.5191	25.4054	0	0	20.4256	33.3333	19.7389	0	0	0	0	0	22.0201	0
0	0	0	3.59308	0	15.74	27.1721	0	21.6005	0	24.4689	14.6555	60.0029	0	39.7478	21.0668	0	10.9212	27.0898	18.3443	0	0	58.3327	0	19.3111	0	42.4399	36.1602	0	0	4.24722	28.6562	50.2603	18.743	34.9059	0	0	18.1053	5.2161	24.5984	0	0	23.46	0	0	0	51.8908	18.2246	0	29.943
0	0	0	15.8743	12.0563	0	19.672	0	40.9159	0	0	10.0287	19.9615	0	0	51.4648	63.9387	0	66.6667	10.9478	0	24.0635	0	0	17.0338	9.41853	0	0	36.2262	0	0	10.0916	21.8709	0	0	0	23.5507	17.0601	19.7297	0	0	7.59155	0	8.37489	33.9717	15.6093	0	28.3198	7.99683	0
9.4393	34.6171	53.3173	0	0	25.3946	0	13.7791	0	24.2801	13.8115	0	0	0	0	0	0	0	0	22	21.3329	0	0	0	0	0	0	0	0	0	14.1782	0	0	21.977	0	14.1829	8.28486	7.92793	0	33.3333	7.73877	16.0652	10.6325	15.816	0	16.063	0	0	0	0
11.9684	4.98344	21.2917	18.4523	15.1052	20.1642	0	0	11.7328	0	13.8422	9.14664	0	51.9226	4.20253	0	0	22.9442	6.24352	0	8.46683	0	0	7.53483	16.4507	10.1449	6.02329	0	9.24498	17.7112	25.0233	0	0	0	13.336	15.9525	0	0	1.80079	15.6876	0	0	0	15.7414	35.7603	23.2938	4.86572	9.05452	27.0817	3.39037
33.3333	0	0	14.4118	0	0	0	0	0	0	12.5026	0	0	0	0	0	0	0	0	0	0	0	0	7.68698	0	0	0	0	0	0	0	0	0	0	0	0	0	23.3361	0	0	0	0	31.3318	0	16.3988	0	0	12.1269	0	18.6244
0	0	0	0	0	32.1207	0	32.2586	0	12.7509	0	0	0	0	0	0	0	0	0	0	16.4334	0	0	3.55508	0	8.58333	13.2754	0	24.9212	0	0	9.7819	3.77892	0	19.3914	18.3095	5.34138	0	33.3333	0	16.9403	14.3308	0	35.9049	0	0	0	18.8686	0	21.7125
0	33.3333	23.5803	0	0	0	24.6289	0	0	33.3333	0	0	46.5616	12.5261	38.8919	20.0529	38.226	33.3333	0	31.0671	0	0	11.4563	0	33.2381	0	25.2443	16.6872	0	44.7584	17.2457	0	0	28.0502	22.4113	0	0	0	33.3333	8.1045	33.3333	0	0	11.7435	0	14.0214	39.6101	0	17.9891	19.1011
33.3333	13.9974	0	19.5349	58.0645	9.18836	20.8576	0	46.2104	0	35.5542	28.3371	0	0	33.3333	22.686	0	13.8917	59.8853	6.95449	8.36786	0	19.3399	0	14.367	0	30.645	0	27.6273	0	16.8402	43.9074	19.1718	0	11.0823	18.781	30.2235	35.4102	12.9163	21.2834	21.7179	33.3333	0	0	33.6164	23.4577	0	0	0	0
24.2955	0	0	5.98003	0	0	0	0	0	0	0	0	0	0	0	0	0	18.4457	0	0	33.3333	0	0	13.1316	0	27.8623	0	0	8.41216	0	0	0	30.3082	0	0	20.872	33.3333	17.7386	0	26.9608	0	6.88299	33.3333	0	17.6209	0	0	8.04003	0	1.94408
0	33.3333	0	33.3333	18.6893	0	14.4158	27.699	33.3333	20.5824	0	0	41.3506	75.96	0	17.744	25.8226	19.4417	11.2052	26.3788	33.3333	70.5635	46.7743	26.1594	0	46.025	0	51.1473	24.6347	55.2416	7.19085	22.7593	29.5544	50.4015	0	0	11.1937	0	0	12.6621	0	29.0461	35.3349	4.3774	0	0	33.3333	7.25296	48.6775	0
0	19.3359	76.4197	0	0	14.5078	22.9786	0	0	33.3333	0	33.3333	0	0	14.608	26.2366	0	0	0	0	8.53208	0	22.4295	0	38.2468	0	8.08906	0	14.4047	0	0	0	0	21.5483	13.9419	0	0	0	0	0	11.6154	0	0	21.5898	0	29.1876	12.0816	0	0	28.9411
9.03786	0	0	17.166	8.60215	24.145	12.4758	17.7414	10.9216	0	38.3342	38.3296	0	11.5138	13.1668	13.2804	35.9514	14.8877	22.1281	35.5995	0	14.9079	0	42.293	14.1481	0	22.7463	0	0	0	58.7233	23.5514	0	0	14.4217	14.5524	0	0	0	6.37255	0	0	0	26.3843	0	0	14.9749	39.758	0	9.67671
0	0	0	0	14.6441	20.0382	4.6434	22.301	0	0	13.6091	0	12.0879	0	0	0	0	0	6.78133	0	0	0	0	0	0	0	0	9.69835	0	0	0	0	14.1616	0	0	15.0239	0	11.9941	20.4171	12.5667	16.393	16.4068	0	0	16.6515	0	0	0	33.3333	0
0	0	0	9.57393	0	0	0	0	9.53472	0	0	0	0	0	0	0	0	0	0	0	0	14.5286	0	7.17388	0	17.5294	0	22.4672	0	0	0	0	3.02514	0	18.7514	12.4614	19.9081	11.5209	0	12.05	0	0	0	0	15.7124	33.3333	0	13.9535	0	0
31.3258	2.90015	46.7231	0	21.2431	31.481	7.62549	8.33114	0	36.2027	25.3595	0	24.4597	0	13.1778	9.73263	29.1858	7.60366	0	6.20369	7.7304	7.56258	63.6828	0	14.9215	0	38.0108	36.8853	16.5528	16.3282	13.1737	36.335	14.8018	25.6273	24.5494	0	20.283	0	8.05327	14.1682	13.2083	0	28.926	10.5517	17.5821	0	33.3333	0	6.54327	24.7666
22.5814	26.1307	20.2325	0	13.6253	6.37656	33.3333	0	31.3002	21.9691	0	35.8559	0	33.0633	23.5054	15.685	0	0	17.0969	10.2999	41.2598	21.5171	0	0	37.8982	35.4748	0	0	14.1589	46.0826	20.1848	0	0	8.15984	0	4.74712	0	0	0	0	18.1051	17.3351	0	53.0219	0	23.182	14.6047	0	0	0
0	2.88881	0	0	0	0	0	0	0	0	0	0	0	23.1353	0	4.13205	0	17.6364	9.53897	33.3333	0	0	0	16.6734	0	0	9.40219	0	0	0	0	0	0	0	1.6968	0	0	5.09221	18.613	0	16.6765	0	11.6985	0	0	0	27.1802	0	0	0
0	0	0	14.7102	33.3333	0	15.5323	0	0	0	0	0	0	0	0	0	37.2133	0	0	5.08951	0	0	0	0	0	0	0	0	0	5.54841	0	0	14.2722	0	0	17.3705	26.9506	0	19.8401	0	0	0	0	0	0	18.3414	0	26.3566	0	0
0	0	0	0	0	11.2643	0	42.3327	30.5299	0	12.6164	0	0	0	11.2151	0	0	19.7884	24.1271	0	0	6.77555	6.95464	13.1837	6.25089	46.9947	9.59413	0	44.9071	0	13.9788	0	7.09535	10.3632	32.2514	33.3333	0	28.2411	13.754	66.6667	0	0	21.9882	0	30.684	10.6261	0	0	34.0237	0
0	0	0	33.3333	0	0	0	0	0	4.87415	0	0	0	11.4392	33.9858	23.6007	0	0	7.74498	19.607	14.9747	25.7708	3.52687	0	8.88729	11.5249	17.0458	20.1153	0	17.0051	0	58.1373	7.30862	33.3333	0	11.732	13.0503	33.3333	0	12.8906	26.423	24.4485	13.9496	0	0	0	0	0	15.0869	8.9182
16.0718	27.5444	26.0817	0	12.0902	26.6728	25.7078	0	17.007	0	15.2091	0	33.3333	17.2744	0	14.3532	0	10.0387	0	0	0	33.3333	0	0	0	0	9.3701	15.2937	5.7496	0	0	0	0	7.70602	18.2366	0	39.716	0	14.7203	0	16.6569	58.2164	0	0	0	22.3795	0	44.8816	0	0
20.6786	20.2121	0	51.9565	19.7081	15.6925	0	49.3361	12.7926	11.3642	33.3333	0	26.3452	0	0	0	0	39.2746	0	0	10.4321	5.04067	12.0534	0	0	0	9.69165	9.66606	0	7.50583	14.4774	0	0	7.51214	0	0	0	33.3333	0	6.27451	0	0	21.6349	0	5.49285	14.9919	6.15313	6.97674	0	66.3153
0	0	0	0	0	0	17.801	0	8.37028	25.5898	0	64.1441	15.8618	0	0	17.6483	33.6009	0	9.29565	0	25.6029	0	13.7823	20.1496	18.6848	6.00559	0	0	0	0	0	0	19.0611	0	0	15.9628	0	0	0	0	0	0	1.80284	24.0519	35.9827	0	18.7287	0	18.2464	0
9.34237	20.3239	6.96281	0	0	8.51285	0	0	0	0	13.4817	0	0	15.0879	18.116	14.848	0	5.65828	32.1963	25.4665	0	0	0	49.9933	13.3574	0	6.88532	18.0396	18.6316	7.52982	38.1853	5.52764	37.4609	7.29817	23.2658	16.8542	0	0	25.0192	0	8.93036	0	0	12.3745	10.2583	10.4791	0	21.785	26.0997	0
0	0	28.8652	24.0014	22.3934	18.8908	18.3443	0	11.2644	0	0	0	0	11.2734	13.8879	0	0	13.318	0	0	13.0825	20.3511	9.51613	0	0	13.4678	5.3824	7.95223	0	13.7501	0	0	0	0	0	0	12.3386	16.643	14.3903	0	0	34.9136	14.1519	0	7.80407	0	17.6441	1.57604	0	0
7.13843	0	0	14.9741	13.2795	0	16.7221	8.05021	0	3.50877	16.7052	17.9845	0	0	0	0	0	0	11.545	17.3038	13.0862	0	5.22053	0	4.13397	27.6632	5.56392	0	18.8967	0	0	6.38645	0	0	1.35763	22.1376	0	12.8248	0	26.8375	0	11.1433	15.0824	16.2662	0	18.5141	0	15.8915	0	26.265
0	0	0	0	0	0	0	0	12.435	0	0	0	8.12259	0	0	23.9328	0	0	0	0	0	0	0	16.659	0	0	0	0	0	0	0	0	0	0	28.3988	0	21.4868	0	0	0	0	0	28.9403	0	0	0	23.9082	0	0	37.4188
49.4878	26.7914	10.5536	0	20.0538	14.4425	11.5586	0	0	35.5656	20.311	21.9962	17.1068	39.4046	24.209	17.5269	0	29.391	26.2295	0	19.3363	41.0663	24.5121	28.902	11.137	0	36.1848	25.3811	19.162	63.2044	22.0136	24.1421	25.1675	76.9055	0	0	10.4714	33.3333	26.3043	16.3248	15.1646	0	0	37.8306	0	26.6446	0	0	0	0
26.1949	0	29.6525	9.87718	10.94	39.1028	11.7802	60.8524	21.5814	28.9896	46.5413	40.2111	0	33.3333	42.1385	13.1181	78.7859	24.3477	34.6395	58.4533	31.799	0	40.7821	0	53.5178	13.5862	0	52.6531	40.81	0	33.3333	43.8984	36.8792	0	46.5345	19.1787	0	0	52.2763	0	33.3333	0	0	0	19.8976	0	0	36.643	19.637	0
17.1789	46.0491	0	17.7349	25.7485	0	9.70082	0	20.9335	0	0	0	21.4298	0	0	0	0	0	0	0	0	0	0	0	0	0	0	0	0	15.0261	13.4749	0	0	0	0	21.2889	0	16.6904	0	0	0	7.12976	0	0	32.4008	20.9745	28.7578	0	0	0
0	0	0	0	0	0	0	0	0	0	0	0	0	0	0	0	0	0	0	0	0	0	0	3.69638	0	25.1357	10.607	0	0	0	0	0	0	0	0	0	0	0	0	20.009	35.0636	31.7531	4.39306	0	0	14.3766	0	0	0	7.06834
0	6.54194	12.6288	9.33193	0	0	0	0	0	13.4056	0	8.47106	0	8.94864	0	0	0	5.44668	0	0	0	0	7.57061	0	9.01486	9.34095	6.11621	0	0	8.01937	11.3197	0	15.725	0	0	0	0	0	0	36.8287	0	0	0	22.4586	0	19.4902	0	0	66.6667	11.0525
0	0	0	24.0805	0	0	10.1192	7.9585	22.0338	0	16.4425	11.3372	25.2107	0	0	20.2153	0	0	0	0	22.6959	13.1936	3.57734	50.7426	0	0	0	0	14.1713	0	19.8585	25.5731	0	3.45708	0	0	43.8567	20.5085	7.02899	0	5.07403	0	37.4324	0	0	0	4.28042	28.4476	0	0
0	20.6175	18.2999	0	7.5848	27.5638	21.7747	23.1389	11.7519	18.5304	0	0	28.13	7.04008	19.7646	25.2069	21.2141	27.4966	27.5859	24.2429	0	25.389	8.82128	0	22.1964	10.8061	36.1457	14.0135	6.95992	0	0	0	22.2283	19.6374	23.7091	37.3949	11.8466	0	0	0	11.3644	15.0603	0	23.4446	39.8975	0	25.4095	17.4419	13.6963	18.1953
14.9498	8.07917	0	0	10.4778	0	0	0	0	2.94947	0	5.56093	0	12.3633	0	0	0	0	0	0	24.2505	0	0	0	11.8422	0	0	0	0	6.11523	0	0	0	0	18.6103	0	0	19.1638	22.769	0	21.2883	13.4486	0	0	0	10.2479	0	19.7863	0	6.70884
14.0687	0	0	15.3333	12.2951	0	0	0	0	0	18.4668	23.425	0	0	10.6689	0	0	17.023	9.22468	0	0	7.46667	0	7.08299	0	0	0	0	7.64115	0	0	10.0119	0	0	0	0	5.38537	0	9.23327	0	0	0	18.7347	11.3033	0	28.0785	2.34127	0	9.29853	0
0	0	0	0	0	38.2627	33.3333	50	9.23133	18.6964	12.7554	0	15.6031	0	33.3333	14.6084	0	0	0	0	21.7983	0	19.9981	0	0	41.3569	0	21.5736	14.3486	41.0813	5.14403	30.77	47.4659	0	2.38743	0	0	25.5075	0	15.3909	0	19.3618	36.8352	20.3873	0	0	0	28.432	30.4323	0
0	25.2542	74.1908	22.9361	15.3401	0	24.1686	15.0662	25.661	20.7816	9.55505	9.08016	0	37.4442	33.3333	20.0615	0	0	0	0	0	0	30.9272	0	12.0389	33.3333	0	0	10.9311	33.3333	0	6.9125	0	9.00679	33.3333	0	10.8826	0	8.90108	0	0	0	0	0	9.02291	0	28.7873	0	0	23.3536
10.6619	0	0	7.20787	0	0	0	0	0	0	0	0	54.5218	0	11.6921	0	0	21.5752	35.5994	0	0	61.7461	0	53.1761	13.1777	0	79.2384	18.9503	0	0	33.3333	0	19.517	0	0	28.5052	11.8338	21.0801	23.0929	29.6422	0	0	1.34053	0	0	6.66351	0	0	11.8216	38.6494
33.3333	26.6652	0	8.12465	8.21111	36.1692	0	0	12.7687	21.0396	20.578	22.6459	0	0	0	11.9126	36.9674	0	0	54.3294	26.8972	0	0	26.2503	33.3333	7.2161	0	0	0	0	58.2201	6.12609	0	35.1526	0	66.6667	33.3333	13.5074	21.1104	3.83195	68.6043	0	29.8315	0	33.3333	0	0	13.6069	0	0
0	0	0	10.3972	0	0	19.8029	34.9338	22.1673	0	0	8.16677	0	0	0	0	0	0	0	0	20.6178	0	0	0	0	0	0	0	19.5494	7.07	0	30.3294	0	33.3333	0	0	22.4508	0	11.9037	0	0	33.8563	0	14.0531	24.3104	0	17.6016	0	0	0
18.3835	0	17.8895	0	53.676	12.7955	0	0	11.2294	27.1886	38.6448	20.5957	17.7303	33.1269	10.9723	18.725	0	61.4017	0	14.7509	0	30.7872	15.3857	13.4906	0	10.3167	0	59.4761	22.4023	0	0	0	0	0	14.7231	4.82809	0	0	0	3.69112	0	33.3333	0	40.0457	0	49.7553	0	18.4484	18.0645	3.25203
0	0	0	36.0009	0	0	0	0	6.06972	0	0	0	0	17.0656	0	0	63.0326	0	16.287	30.9197	0	0	13.3352	0	8.31343	0	20.7616	0	18.9847	9.81789	0	15.8501	19.2008	0	30.9459	0	0	7.82579	2.98963	47.4438	10.1074	0	0	0	33.3333	0	51.2698	0	30.383	28.0361
8.60272	40.0015	7.91977	0	0	12.7725	22.6952	0	12.8726	9.34428	0	10.5255	12.1449	0	0	34.6926	0	0	38.889	0	6.43609	0	20.3538	0	21.2945	7.77696	0	0	6.14281	2.58221	3.30249	0	13.8163	22.5073	0	0	16.1141	12.9154	0	0	0	0	13.2581	14.2107	0	5.25486	0	19.7265	0	0
12.9589	0	0	18.3171	0	0	9.24624	17.5522	0	0	3.72625	6.18572	0	0	0	0	0	0	0	0	16.8615	2.92755	0	0	9.71329	0	0	0	0	13.6279	0	10.0617	4.52532	9.47867	0	4.74957	0	0	0	0	19.7235	19.3725	16.7264	0	2.71257	0	0	32.6269	0	4.58583
14.0395	0	0	0	0	29.2496	9.09419	0	12.8393	8.48953	0	0	13.4088	0	11.9393	4.534	0	0	0	0	7.55104	5.23259	0	0	0	4.52266	0	4.3764	5.04719	5.06286	0	0	0	0	45.6829	17.9096	6.14545	11.4419	0	0	3.59111	0	12.9529	0	0	10.9958	22.0861	0	6.2342	23.6474
0	0	0	0	12.966	0	0	0	6.09067	11.0518	0	0	0	16.9473	0	0	0	0	0	0	0	0	10.6088	0	0	4.08005	0	0	0	0	0	20.9566	0	0	0	0	0	30.9535	0	5.26867	0	0	9.55695	0	0	16.4219	0	0	12.7519	0
0	0	0	0	0	0	0	0	0	0	0	0	0	0	0	0	0	0	0	0	0	0	0	0	25.5506	0	18.9821	0	0	0	0	0	0	0	0	21.3515	28.4405	0	54.732	33.3333	18.7101	0	0	33.3333	28.0084	0	0	21.4238	27.2489	0
20.3744	6.63156	0	15.0162	0	24.1866	0	0	0	30.0582	35.3132	0	16.6742	25.5646	0	0	0	0	18.6346	29.3025	6.04295	8.4632	0	0	0	0	0	0	16.4282	12.7449	0	0	0	22.9824	12.7384	19.7809	33.3333	21.3986	25.0816	22.3925	17.1512	25.6114	0	20.8787	28.525	19.6785	20.6492	0	0	21.1621
7.41555	33.893	33.3333	12.0518	19.6461	12.8009	53.235	19.5656	49.4095	22.2816	0	50.209	42.8878	22.5089	82.7981	31.7969	0	32.2722	32.4765	66.6667	28.5602	0	39.831	28.1242	33.3333	0	14.3512	61.8615	54.1231	19.7054	5.93189	45.1056	33.3333	0	0	0	8.28491	12.2747	0	0	13.6098	55.0161	3.125	21.5088	0	36.1723	12.4231	33.3333	13.4372	7.15832
0	0	0	0	0	0	24.0871	50	0	0	29.6071	27.1476	0	0	0	21.2723	100	0	0	0	0	18.2169	33.3333	17.2112	0	8.84915	40.0872	0	0	0	0	0	0	0	0	0	0	0	0	0	0	0	16.6069	0	14.2801	0	11.2473	0	6.08447	0
19.2938	0	66.6667	21.2815	0	0	0	0	0	14.4074	22.0931	0	0	7.76871	0	16.9444	0	33.3333	0	0	0	0	0	0	23.62	0	0	21.3651	0	28.2705	18.4335	4.456	33.3333	51.9386	0	0	0	0	0	10.9408	0	0	0	11.8245	21.6656	0	0	0	20.5814	0
25.9178	20.5437	0	0	34.0546	33.7628	0	12.8822	0	13.7115	0	16.4577	16.6591	16.386	0	0	0	0	38.1988	0	0	0	0	0	0	82.5481	0	12.3971	0	20.5884	0	0	0	0	10.2079	22.656	4.89281	0	11.9347	0	0	0	41.0318	12.4547	0	0	0	0	0	30.5817
0	38.9318	0	33.3333	33.3333	0	4.33744	0	31.6606	0	9.26041	0	10.3701	10.8244	5.26268	25.4524	0	34.3945	10.6901	4.03083	40.9843	65.1597	16.2269	54.6647	7.78269	0	26.5795	0	24.4015	0	75.6346	19.4201	28.808	15.6003	31.3708	13.5524	18.903	23.9313	8.25172	28.0647	27.2143	0	0	0	4.80836	16.7314	33.5944	12.6159	13.6619	12.8646
14.6765	0	48.3663	21.7057	0	0	0	0	0	0	0	0	0	0	0	0	0	0	0	15.4331	25.2609	0	0	0	0	0	21.6506	21.5956	0	12.2504	0	15.0241	10.2953	40.4211	0	0	0	13.6431	0	17.1072	0	0	0	0	0	0	17.1738	0	5.99966	0
8.53988	13.8486	0	24.13	8.87097	46.1641	100	77.7806	9.49728	72.2345	0	22.4371	28.4021	41.2937	57.9296	27.1327	34.3604	11.4403	27.3806	37.4565	0	0	0	33.3333	29.9272	0	14.8761	23.7053	36.3644	30.8126	0	0	0	0	0	0	15.0619	0	41.5857	0	43.2165	0	0	7.2416	0	16.7799	0	14.8726	20.4642	23.4009
0	0	0	0	0	33.3333	0	0	0	0	47.6182	21.2121	0	25.4832	0	15.4224	0	0	39.1008	0	0	0	18.6584	0	33.3333	0	0	0	0	0	0	20.616	43.0488	0	4.13362	0	0	33.3333	0	0	0	20.7343	15.2211	21.3729	0	24.4236	0	0	15.4203	0
24.1912	33.3333	0	25.0016	0	0	0	0	0	0	33.3333	0	33.3333	0	33.3333	20.1009	0	55.2263	0	0	15.9293	0	21.4742	0	0	33.3333	0	0	0	0	20.9409	25.0763	0	37.3211	0	33.3333	0	29.8715	0	15.2183	0	36.6928	12.2182	17.7706	12.1361	26.2497	0	24.7443	9.48012	0
0	33.3333	9.39881	11.6276	81.5681	0	0	0	23.0436	9.65477	0	0	10.1109	0	8.73708	0	23.4393	33.3333	0	0	18.9023	33.3333	5.21758	52.2153	11.4116	50.4378	11.6827	0	0	35.854	66.6667	0	0	0	19.189	36.0815	0	0	0	0	19.6034	0	21.3128	0	55.2481	0	0	0	0	29.5153
33.3333	0	0	0	0	0	0	0	0	0	0	0	0	0	0	0	0	0	0	0	0	0	0	0	16.7347	0	18.4572	17.8959	42.5321	21.0829	0	10.3997	23.038	0	0	0	48.3936	0	16.6136	41.8409	14.3515	5.00483	0	0	0	4.6021	0	18.4607	12.8691	0
0	19.4848	6.75982	8.33178	0	0	0	3.18426	15.7208	4.63889	0	6.19501	0	0	0	0	42.2004	0	0	0	13.8109	33.3333	0	0	0	16.2289	0	9.62806	0	0	0	0	0	0	33.3333	0	0	11.7107	0	0	0	0	0	11.9604	8.8246	3.24603	49.4928	28.0778	23.8532	5.48272
5.38032	0	0	9.20332	9.56093	3.52552	0	0	22.7077	2.95471	4.14476	0	0	17.1588	0	0	0	0	7.4184	0	0	33.3333	0	14.4513	0	0	0	5.43677	0	0	12.3925	8.25706	23.6179	0	0	0	0	0	0	18.1151	22.8287	0	21.1152	0	3.98133	19.035	0	0	0	11.0673
13.8787	0	35.4751	0	0	16.9771	0	0	0	7.49663	12.3443	0	28.1536	12.3964	0	13.2324	0	0	20.5446	0	14.431	0	54.6498	0	0	0	33.3333	0	0	0	0	0	0	8.83277	14.1444	0	3.21122	0	26.6697	0	0	11.5885	30.1328	41.6545	7.43728	0	33.3333	13.8446	11.9134	0
0	0	0	0	0	0	0	19.0351	29.0306	3.02047	2.5594	50.1558	0	3.668	0	24.1115	0	0	5.55556	47.1103	11.6656	0	0	0	8.59312	0	0	21.7384	21.1035	0	0	20.6268	0	13.425	29.1997	30.5851	33.3333	11.4413	15.131	7.71861	0	25.9795	0	0	12.3726	5.66376	0	0	0	30.5338
19.3157	13.1374	0	8.599	0	0	16.7469	0	0	0	18.2278	0	8.9906	0	25.0355	0	0	0	0	0	0	18.0618	0	20.253	0	0	0	0	0	0	0	0	27.3143	0	20.3758	0	0	6.90209	0	0	0	0	0	11.3463	0	19.2606	33.3333	7.00867	20.5145	0
38.951	36.2106	27.9662	32.0518	61.7498	26.9623	21.637	0	17.1821	21.8904	16.3099	14.6595	0	8.39495	13.9159	27.3543	0	55.9414	22.0689	22.0526	0	33.167	32.7476	52.2213	33.1878	45.3186	51.4457	14.7456	17.4489	19.146	58.319	0	10.8791	17.2157	0	33.3333	22.7056	3.13015	14.9372	0	16.492	0	20.1845	0	0	10.8166	33.3688	0	33.3333	0
0	0	64.1333	0	0	0	0	15.2625	21.9202	7.49552	0	30.1483	16.2306	6.89655	27.2621	0	0	0	6.35476	0	64.3491	0	0	0	0	33.3333	0	22.5872	0	38.6942	0	69.7741	25.2865	7.77218	22.5238	0	0	0	0	0	19.8579	0	0	0	68.9619	0	0	1.6397	0	0
0	0	0	0	0	11.5608	2.2695	11.6918	0	0	7.34761	0	7.17233	0	19.4175	0	0	0	0	42.0656	0	0	0	0	0	0	0	19.045	10.848	0	19.5339	0	0	0	0	11.9518	0	16.5116	33.3333	22.3608	0	17.8571	9.09905	0	0	0	0	33.3333	0	0
0	18.0651	0	27.1722	0	0	0	0	0	0	0	0	6.94665	0	0	0	0	44.0586	0	0	0	24.7045	32.0915	0	22.1549	0	0	0	0	23.2017	0	0	0	0	14.6451	5.55556	30.7329	0	0	0	0	0	9.85155	0	0	17.3284	15.8771	26.3247	36.9051	0
18.0622	26.7607	5.36714	9.49628	27.2705	23.0052	37.1566	38.3082	20.4192	0	0	34.5597	0	33.3333	0	55.3555	77.7501	0	0	24.6011	0	15.2715	12.9068	27.5256	24.0303	12.1978	48.5543	15.1229	35.0849	12.1596	8.66968	0	0	58.8945	10.8095	0	33.3333	26.4312	0	0	22.7018	59.0937	18.7269	73.4063	10.3756	11.0376	0	31.6936	0	33.3333
0	0	0	0	0	38.4717	22.1901	34.7375	0	21.8601	37.6305	15.3134	43.5571	0	0	0	0	0	26.9786	0	0	0	0	0	0	7.11307	0	0	0	0	0	7.9304	30.5011	16.1176	12.9575	21.3815	0	30.2032	51.7295	35.1655	0	0	0	0	9.7934	0	17.4207	0	0	53.8468
9.65348	0	0	6.93799	10.9797	0	0	0	40.4785	48.754	7.75789	0	17.1027	24.9384	14.3691	0	22.2499	0	44.5977	11.2807	15.4468	8.79518	15.5049	0	15.9627	0	0	25.0345	36.6182	0	13.4774	22.2955	0	0	0	0	8.62431	16.8217	0	0	13.4755	0	0	0	0	0	0	0	9.247	0
14.0176	5.82611	0	15.7428	0	0	0	0	0	0	0	0	0	26.4368	0	0	0	0	0	0	0	0	0	0	0	0	0	0	0	0	0	0	0	0	0	0	0	0	0	42.4736	16.8413	0	42.138	15.2474	10.8691	0	0	0	0	0
0	0	2.53337	0	0	0	0	0	0	0	12.7262	5.31907	0	0	0	17.2902	0	0	0	0	20.2042	0	6.74919	0	4.66438	2.03719	0	3.46487	0	6.79836	0	0	6.01903	0	18.6882	27.7778	4.60387	0	0	0	10.6315	23.0491	0	0	0	41.5569	0	0	0	12.8199
0	0	0.854603	0	0	10.3343	0	0	0	8.133	0	0	0	0	14.7571	0	0	7.48079	0	0	0	3.07857	0	0	0	0	5.8989	9.26321	2.4417	0	0	8.10932	0	0	17.6982	21.529	0	12.4339	25.5538	27.8687	0	8.08824	29.0395	15.0038	6.47308	0	37.3566	25.3724	22.357	0
11.756	13.335	2.00312	0	0	7.91274	6.95371	0	5.50014	14.5991	7.89485	9.20097	10.9011	0	0	0	27.012	13.7629	25.7556	0	7.08944	22.1446	6.025	13.9536	0	28.8237	2.39085	14.97	12.6294	9.77769	18.1205	3.97138	5.21076	24.5646	0	0	17.3609	0	0	14.9261	0	0	0	15.4226	26.9785	0	0	0	15.2412	0
5.20183	5.60823	0	7.53099	23.735	20.3599	22.7112	0	0	14.6153	16.6867	0	0	35.2557	25.5605	8.32728	0	11.2297	18.1481	0	33.3333	0	0	15.4624	0	9.54094	0	0	0	9.77189	20.5582	0	10.4395	0	3.66334	0	0	0	0	0	56.429	0	18.2063	0	0	4.8156	0	19.6785	9.02708	0
0	0	0	0	0	0	0	0	0	0	0	0	0	0	0	0	0	3.32479	0	40.6536	0	0	4.41767	0	0	0	2.86902	0	4.94215	0	0	2.45503	8.11621	0	1.70138	0	20.5626	46.5741	0	13.351	0	36.6574	23.2679	0	0	0	0	0	0	10.655
0	10.3121	0	19.5308	14.1821	14.1737	0	16.0885	28.2184	7.70111	5.89885	16.4666	11.7599	0	0	13.1062	0	0	0	0	4.56349	7.98053	6.56952	0	0	0	0	0	0	0	4.23908	16.2961	0	0	0	28.264	5.64972	0	10.4025	1.28476	20.5321	17.8183	0	3.57367	16.0107	0	36.7239	10.1006	0	33.3333
0	5.20438	0	4.33884	8.75162	0	0	28.1476	21.5025	5.07012	0	0	0	0	29.1412	13.3349	0	5.64708	9.10452	0	0	0	0	25.5497	0	0	52.1225	15.7549	0	6.73455	18.5461	0	3.72197	16.7583	26.258	0	0	0	24.7416	6.60249	0	0	0	0	0	28.5177	6.87947	13.6549	2.08146	33.3333
0	0	97.1423	0	0	0	12.7885	0	0	18.718	19.7443	24.1324	66.6667	23.052	0	9.53764	36.3383	0	15.1852	4.69713	0	19.6889	5.98981	9.25618	0	8.14026	9.98995	0	0	0	0	26.9069	0	0	0	33.3333	24.312	9.13598	25.6515	0	0	0	17.169	4.07623	26.8603	16.3387	0	2.65152	0	0
0	0	0	0	0	22.6748	19.35	7.58291	0	0	8.774	50.2	10.6724	5.39882	18.5762	0	0	36.4511	0	0	5.48751	0	0	0	33.3333	6.83433	0	0	0	0	12.7751	0	0	0	29.67	0	21.792	20.8995	0	19.9823	4.77351	0	0	0	0	0	0	15.1584	18.0921	0
33.3333	0	0	35.266	14.4493	0	0	21.8524	27.8779	13.6641	0	0	0	12.0536	0	0	36.6497	0	31.8065	0	21.6804	0	0	0	66.6667	0	0	60.0119	79.9868	20.4363	0	17.0372	22.8938	31.2567	21.009	0	0	0	0	4.17987	12.8012	37.4361	0	29.7597	23.6775	16.9947	19.0401	0	33.2011	0
49.7088	65.5403	0	33.3333	38.8819	24.5444	38.1966	26.3286	16.901	17.4992	41.0013	0	0	24.2398	11.9649	55.6939	0	22.1036	0	54.6493	27.8458	47.1073	76.998	35.7781	0	46.6607	26.7288	0	0	53.2796	25.761	25.224	49.6177	27.4204	0	16.8737	10.3227	10.9566	13.6506	11.8047	5.46415	0	12.3173	32.164	0	33.3333	0	13.3838	0	22.6783
12.2656	0	33.286	0	0	0	0	0	0	0	0	0	0	0	17.5093	0	0	0	0	0	0	0	0	0	4.0056	0	0	0	0	0	0	0	0	0	0	0	0	0	0	0	0	11.8002	10.5693	0	0	8.30057	5.4999	16.1036	0	13.9434
0	0	0	7.10016	12.088	18.4125	0	7.249	24.0926	33.3333	0	37.9464	59.9486	12.1827	0	0	0	7.40794	13.8562	15.8443	16.1315	16.9075	0	9.55502	30.0653	19.4955	0	17.8164	0	0	0	26.5446	0	0	0	37.3006	0	9.47381	0	0	22.5123	0	25.2404	0	19.3645	0	27.725	12.7923	11.3363	5.88692
0	18.6719	0	0	0	6.22912	41.9772	0	0	11.9186	12.3504	0	0	0	33.3333	0	39.8575	0	16.8153	0	11.9518	0	15.4572	0	0	6.19463	9.59239	21.9239	0	0	30.357	0	0	0	32.5904	0	0	0	0	0	0	15.6801	0	0	22.272	0	11.2355	0	0	0
13.9021	0	17.506	20.2196	0	22.2507	0	0	6.40567	33.3333	33.3333	0	0	21.3242	0	14.8064	0	7.53566	0	0	0	0	0	0	0	0	17.0545	0	0	35.4969	0	0	42.7607	5.72046	0	0	65.434	22.8512	0	18.2299	0	0	0	21.1488	33.3333	1.61643	0	0	10.2534	0
0	0	0	7.96791	37.855	9.89061	12.4158	56.9418	6.89149	0	0	20.2385	0	28.5897	6.08627	34.4756	0	0	7.91989	0	10.6988	0	0	0	10.084	0	0	0	18.9892	0	33.3333	4.51369	0	0	0	11.4435	0	0	44.9225	33.3333	17.6299	36.8041	0	0	0	12.4335	0	36.8689	33.3333	14.291
0	39.9115	17.3185	7.04157	5.52289	0	0	0	9.24077	10.6811	20.9829	0	20.6119	0	0	0	0	0	0	15.8633	12.1579	49.7592	11.6381	3.17487	21.7122	13.8378	33.3333	33.3333	58.7643	0	0	0	9.95507	11.0947	33.3333	0	12.2985	24.5558	17.0602	0	16.3483	21.5331	0	33.3333	0	0	25.4966	20.541	21.997	14.6995
43.5533	33.3333	6.53455	0	0	0	0	0	26.9277	0	33.3333	15.7267	19.4395	0	6.05421	0	0	0	0	33.3333	0	33.3333	0	33.3333	0	10.7117	0	0	0	12.7264	0	11.2495	0	31.3042	0	21.8898	9.67742	0	0	33.3333	0	0	39.1376	0	0	0	20.7134	0	0	0
19.4313	8.08333	8.03674	0	0	28.2962	0	0	0	0	0	0	0	0	0	0	60.1425	59.2587	0	0	0	0	0	0	0	0	10.6168	26.9264	0	31.1698	17.5821	0	23.9059	0	11.899	29.3661	0	0	5.15581	0	0	0	0	15.883	11.0613	44.3162	7.83676	0	0	0
0	0	0	39.8752	28.8117	14.9209	45.607	18.2791	0	10.7337	0	0	0	12.0092	27.2471	22.2623	0	25.7977	16.518	0	9.22368	0	72.9047	20.6034	19.2437	0	0	0	0	0	0	50.4136	23.3783	22.2386	22.1772	0	0	43.1191	0	0	0	14.1825	0	29.6348	13.9688	0	0	13.6942	23.0799	51.1793
10.8477	0	17.3183	17.7956	15.7224	0	0	17.5301	26.4418	0	0	26.0885	0	25.8943	9.76983	28.4558	0	0	44.8905	34.959	39.8364	0	0	33.3333	14.8892	49.7603	29.403	0	22.2465	20.6069	18.7275	7.2787	0	29.642	0	0	12.5901	0	32.8615	15.1035	43.5095	0	25.0527	0	0	33.3333	1.49283	0	0	0
0	27.0783	16.4441	0	12.9425	0	11.1767	0	22.017	0	0	0	16.295	0	0	0	0	0	0	0	0	53.1516	0	0	0	0	0	4.72798	0	0	60.2246	0	18.907	0	0	9.64571	12.9446	0	0	0	0	0	0	18.6581	24.1122	0	0	15.3326	39.6826	0
19.7602	33.3333	0	0	0	0	0	0	0	27.6211	42.8731	18.4596	29.8509	5.24443	19.665	4.84035	0	15.1911	5.18585	0	0	33.3333	6.08932	18.998	0	20.155	0	19.6968	11.1222	14.5781	14.6788	0	0	16.061	0	0	0	0	0	0	0	3.61645	0	14.5365	0	7.6779	20.9909	8.77193	0	0
25.1865	0	0	12.7078	0	0	0	0	0	0	0	0	0	0	0	0	47.3346	11.7021	14.8526	0	15.9009	0	0	0	33.3333	0	25.8101	10.291	0	15.1333	0	0	17.1286	0	29.6354	48.1746	10.4812	14.9556	0	0	32.7843	5.82973	26.7628	0	8.98551	0	0	31.8408	17.2915	16.3327
33.3333	20.9119	23.7498	18.5239	69.0345	57.9082	48.1918	13.2164	33.3333	4.72004	0	14.3438	9.549	0	18.0853	0	0	17.4797	0	77.1758	33.3333	9.45124	0	33.3333	58.2408	0	12.4894	3.98771	51.4744	17.5953	0	79.9125	11.0623	5.87227	0	13.133	5.37914	0	0	3.66237	0	33.3333	19.5847	17.1916	0	11.186	14.8834	0	0	0
0	0	33.3333	0	0	20.4759	10.1374	38.015	0	34.5069	0	39.052	36.8158	15.7565	0	28.493	0	0	21.1211	0	33.3333	0	33.3333	0	0	13.1783	0	0	0	0	0	0	0	0	0	0	33.3333	30.1918	45.317	0	17.2253	22.4633	0	14.6753	0	48.9753	0	7.69371	0	0
0	6.25503	0	0	0	0	18.4749	36.7836	11.3163	0	19.9201	0	0	28.0889	22.8973	20.4738	34.7863	0	18.4808	0	6.39727	0	33.3333	33.3333	0	33.3333	27.1817	30.3497	0	0	0	0	52.9022	26.0937	33.3333	0	0	0	9.24131	33.3333	0	27.5036	33.3333	0	49.3661	0	0	4.99513	0	66.6667
0	12.4215	4.05478	48.1428	3.9548	0	0	0	0	5.74194	9.12768	0	0	33.3333	6.44698	33.3333	0	0	33.3333	11.1182	0	4.06381	27.244	0	0	0	0	0	0	34.4933	0	20.0875	0	10.3678	0	0	37.8617	0	0	63.0043	0	0	0	2.9041	17.5362	0	23.2992	1.49254	26.9841	0
21.72	0	0	0	0	0	12.0192	0	33.3333	6.74164	0	9.94087	0	17.5768	0	0	0	0	0	0	0	0	0	0	8.42585	0	23.4746	0	37.4034	0	0	0	0	0	18.0192	13.3281	0	0	0	0	18.4211	7.25356	0	0	0	13.3491	20.0314	1.53509	16.0419	0
0	0	22.4179	20.6255	14.0682	8.75842	0	0	0	9.11126	23.2211	0	0	0	0	0	17.8791	55.6271	0	0	11.0352	0	0	0	0	0	0	0	0	0	18.6545	0	0	22.9655	19.012	15.7185	0	22.3759	45.4417	0	16.108	0	0	16.1417	0	18.8118	0	0	0	0
0	0	0	0	0	12.8575	0	11.985	0	11.5571	4.85805	18.2037	7.48929	0	32.9054	12.8596	0	0	7.02638	11.706	0	0	0	14.3354	0	33.3333	11.0442	30.9469	0	18.2	6.44203	0	0	18.6397	0	0	0	32.4767	0	0	15.4613	0	20.3191	15.8928	0	0	20.7951	28.3382	0	17.0006
32.1987	9.1357	13.956	12.9406	0	13.9619	27.4598	38.1221	19.6799	8.49927	10.5917	12.396	16.8248	33.3333	0	19.878	0	0	0	22.5043	22.388	0	22.6664	0	43.9762	31.4545	12.4851	0	0	0	0	21.3694	0	0	0	0	0	0	0	35.2093	0	0	0	0	0	0	3.0431	7.79336	9.31216	18.8859
0	35.5633	42.5977	0	32.9189	0	18.0989	21.7783	14.8289	0	12.04	11.4102	5.1082	0	0	33.3333	100	9.49995	6.55191	16.8549	15.6681	11.3287	17.1682	7.65101	0	10.7587	22.031	18.3634	39.4451	21.8284	30.896	9.84675	63.9968	11.5444	0	26.1827	0	0	29.521	4.71993	37.5495	23.562	17.6395	42.6862	11.9573	36.9622	0	0	0	0
0	0	0	0	0	8.72137	0	0	0	0	0	0	0	33.3333	0	0	0	0	14.5836	15.3894	0	0	25.0067	0	0	0	0	0	0	9.28952	0	22.236	0	0	0	7.44204	33.3333	10.2311	20.9127	0	0	10	0	0	0	24.0975	17.4318	0	33.3333	0
15.4104	0	0	24.7428	0	26.551	0	0	10.5867	33.8986	13.4612	12.3434	4.13025	23.7978	36.4412	0	0	17.7961	33.3333	0	33.3333	9.30692	0	33.3333	14.3052	0	12.5861	0	16.4015	18.5594	8.50348	8.33333	0	7.75611	49.9029	14.4553	18.1044	12.7589	0	13.7068	7.86297	0	0	0	0	0	18.0794	67.296	0	0
0	14.3872	0	0	8.52252	3.15992	25.8871	0	40.4601	33.3333	0	0	33.3333	0	0	15.4577	0	50.7035	12.6772	0	0	41.4383	6.9693	0	0	12.5978	0	0	0	0	0	0	0	38.2797	15.7062	0	0	0	6.31271	0	0	15.9355	27.7038	0	6.50443	0	21.8576	0	0	53.1878
19.7209	10.985	0	28.1569	0	0	9.36747	0	0	0	0	20.9373	8.86674	0	0	0	0	15.5372	0	19.0653	0	0	10.6669	50.8679	4.20801	39.2548	12.8569	26.2051	0	0	40.2062	11.964	0	0	0	5.11397	33.3333	20.5745	3.81232	0	0	0	9.85698	0	66.6667	0	0	0	0	22.4566
0	6.8142	19.3773	0	18.5044	16.5973	0	35.5274	0	0	13.3699	0	24.0949	0	0	0	0	0	0	0	0	0	0	0	13.6611	0	27.0309	33.3333	0	24.0438	0	0	15.3055	0	0	0	0	0	14.0608	26.419	0	13.5661	0	0	0	23.7116	0	24.9106	0	0
0	5.15155	8.34792	34.1597	0	0	0	0	0	0	9.2804	42.9131	0	9.53558	33.3333	31.3309	0	0	21.7303	5.61464	17.6652	37.9261	17.5225	0	13.5804	0	0	22.0981	34.0135	14.774	0	26.2506	20.6976	0	0	18.878	0	0	12.4206	8.11771	54.5875	0	15.4727	44.091	0	15.2288	15.2539	0	31.1349	0
32.6699	0	15.7211	0	24.8108	14.9156	13.3197	0	0	0	0	0	0	0	19.2982	0	0	6.4632	0	0	10.9453	0	0	0	10.269	0	0	0	0	0	0	0	0	25.9562	16.7637	0	15.2289	56.4355	0	0	0	23.3333	5.83688	8.38516	0	0	11.4758	0	0	0
0	17.9631	0	0	15.2433	16.0928	5.86701	4.5722	14.4444	24.2688	41.2568	0	7.64181	0	10.9273	0	0	0	11.1237	20.5715	0	0	0	8.14775	0	5.93416	13.0099	0	10.1399	11.5049	20.3943	0	0	16.4636	17.6272	27.928	0	0	12.9599	11.8274	0	13.6031	23.4901	4.83764	14.8716	0	12.8584	0	26.2197	5.46968
4.6539	0	0	0	0	0	0	0	12.3468	9.86201	0	9.29649	11.3974	13.1624	4.80908	20.32	0	33.3333	16.1072	0	0	0	17.7202	0	0	0	8.03719	0	14.535	11.9568	0	15.313	7.10148	0	1.13672	0	13.0944	0	0	42.6172	0	0	0	0	14.2923	15.2721	2.4359	22.0232	19.5095	0
36.1791	0	0	33.3333	33.3333	0	21.3022	0	17.8799	0	7.88052	19.7942	22.7627	0	14.0198	12.9687	50.1839	0	0	0	0	0	9.1879	38.6343	3.08814	0	11.2508	12.6086	0	14.0956	0	0	10.007	11.2402	0	19.2172	12.824	9.15884	30.2377	0	15.2849	19.2296	0	0	0	0	0	0	0	36.8972
0	13.8765	10.1856	20.0994	11.4836	17.3749	12.1048	42.4373	0	0	0	0	13.8905	0	0	7.427	0	0	10.525	0	18.4128	11.535	0	0	17.3958	4.82584	0	2.08434	13.7624	0	0	0	8.49823	26.0819	0	33.3333	0	0	0	18.3078	22.5542	0	15.8437	37.4183	0	0	4.73304	0	0	0
7.1963	48.1039	0	16.0842	6.52467	15.9667	0	0	9.8998	12.7613	20.8375	0	0	54.2463	0	0	0	6.97086	0	0	8.65074	15.1881	0	33.3333	0	0	0	0	0	23.0714	0	10.4995	0	0	40.4642	0	28.8575	0	20.2431	0	0	12.4629	0	19.846	0	65.6296	19.3503	20.205	7.38903	12.2479
0	0	40.0419	0	0	14.3235	7.04236	0	9.72651	12.3376	18.3411	46.8725	10.5706	0	9.80728	0	0	0	9.62789	0	0	10.7423	0	0	16.6017	0	0	0	0	0	14.5621	6.60872	0	4.43611	32.1966	33.3333	0	26.4719	0	0	0	2.27006	2.90144	0	0	0	41.3015	0	33.3333	0
15.0066	0	9.7115	0	4.18265	0	4.27135	0	0	0	0	0	29.861	26.085	0	25.8708	15.1804	16.8406	5.40004	50.5012	9.93313	0	0	0	0	15.2328	21.8734	9.59291	37.5637	0	26.3441	0	17.4302	33.3333	0	0	20.2389	17.0316	0	0	18.0484	33.3333	23.2734	17.4144	49.2787	0	0	33.3618	0	17.9146
0	0	0	0	0	17.3666	0	20.7955	0	0	0	0	0	0	10.4887	0	0	0	13.4994	0	0	18.1452	31.5552	0	22.3619	16.2288	33.3333	10.7343	18.7984	31.6384	0	0	24.8351	0	0	0	0	0	3.09563	0	7.74934	20.8704	0	0	0	11.681	13.9831	0	39.7681	0
0	0	0	0	0	0	0	0	25.4295	0	0	24.0368	0	0	33.3333	25.9063	0	0	7.59823	15.1279	24.6826	8.03228	21.0728	18.5741	0	0	0	0	0	19.2378	52.1046	7.52084	0	0	14.6202	0	0	17.4643	33.3333	15.9437	0	0	30.4319	0	21.6719	0	0	0	0	11.8548
36.9641	0	40.061	17.2491	44.4757	19.0099	0	0	16.8137	39.2516	0	0	4.087	0	0	7.50716	34.6356	26.3625	0	21.3348	23.4002	0	0	0	26.909	51.4339	13.1902	0	0	0	0	26.7246	32.128	7.25142	11.5823	14.1161	4.47585	0	0	8.10577	26.012	0	17.4896	0	0	0	18.1962	13.1283	0	0
0	38.0196	0	13.2339	0	15.9584	55.2793	36.7671	7.90388	25.7875	52.9409	0	7.43077	6.50632	27.5418	0	0	16.4928	37.2422	13.0361	14.9206	36.357	20.464	9.45821	13.6435	12.2787	12.3151	64.9799	15.3406	0	6.98925	33.3333	0	17.657	0	0	20.5094	29.8733	13.0902	15.0255	10.3511	11.8336	10.06	25.3213	14.7571	7.41737	0	11.2817	0	21.0854
24.0618	19.8014	0	0	0	11.9529	0	0	15.912	0	0	21.9258	18.425	18.1104	16.6983	0	0	23.967	13.4404	0	0	0	6.26569	12.2932	7.70379	0	0	0	0	33.8402	6.86981	19.3825	0	10.5459	27.5532	14.8639	0	7.92697	23.7005	4.81533	0	0	0	0	0	0	1.91321	22.5682	11.9393	20.2812
16.6034	6.36494	14.5974	27.6673	40.526	0	0	0	20.9488	12.9448	10.3627	15.7261	0	0	0	27.7871	0	16.9524	0	51.4355	44.8276	20.2717	0	41.4386	18.4209	17.2842	35.0736	0	16.1308	10.8414	13.8504	0	31.5517	16.328	19.5609	17.0258	38.4316	0	21.7535	0	0	0	0	0	18.2869	24.4606	3.46032	0	17.0586	0
0	18.5575	0	28.3902	0	14.5251	0	16.9447	0	0	0	25.5891	0	33.3333	11.4688	12.5349	100	0	20.6944	0	0	0	0	0	26.2989	16.0368	0	0	0	0	16.4708	0	0	0	0	0	0	0	0	26.9112	10.9059	14.9731	47.9167	37.0902	0	0	0	0	0	21.9629
0	20.9845	39.027	0	7.84886	9.05724	0	30.775	9.33926	14.6793	43.7918	0	45.2915	19.0476	16.3747	22.372	0	0	0	0	11.9104	21.0001	15.2436	0	7.35553	0	0	0	47.9159	7.74044	9.82456	12.7546	0	0	24.3539	4.37086	0	8.4391	0	0	0	66.6667	0	13.9954	5.40459	36.7014	33.3333	14.8552	0	0
0	6.52331	0	0	12.2166	0	0	0	0	0	12.917	7.85528	9.22175	15.2229	0	0	0	36.7039	4.09535	0	6.07809	0	0	21.0401	0	0	13.9962	0	0	13.1872	0	0	30.4525	39.7928	0	30.3729	0	8.00667	0	28.518	33.3333	0	0	0	0	0	29.873	0	21.3941	0
6.14663	14.7758	33.3333	0	0	15.7729	33.3333	0	5.45844	39.4241	0	6.96571	0	0	5.02017	9.79455	0	0	0	6.19765	0	33.3333	0	7.05381	0	49.3824	10.1881	19.1852	17.2025	0	0	38.9432	16.5984	17.8105	0	12.7588	0	0	42.9661	0	33.3333	0	18.75	0	51.3285	0	0	10.7651	34.7729	33.3333
0	0	0	24.1387	0	0	66.6667	7.81536	23.9941	0	0	0	0	0	0	3.07714	0	16.381	0	0	13.6713	0	8.35426	0	14.9125	17.2966	0	0	0	7.90731	0	11.4474	11.1264	0	22.7519	0	61.5684	33.3333	11.5798	18.536	22.4274	18.3602	33.3333	0	0	4.95838	31.4201	0	0	13.0521
16.7299	7.00864	0	14.1378	18.2918	18.8082	0	19.225	0	18.654	32.9285	7.74428	0	0	16.9587	0	0	0	33.3333	29.224	10.8327	0	0	0	18.274	0	0	33.3333	0	14.7515	16.639	0	0	0	5.78015	14.0986	0	25.3267	0	21.2195	0	0	0	29.5764	0	8.87269	0	0	0	0
33.3333	0	0	5.66605	21.1167	17.5605	0	25.2399	6.92612	14.2977	0	0	20.4426	0	0	10.9613	0	5.9957	28.4365	0	0	25.3948	26.1347	0	7.03443	0	21.405	47.4815	18.7508	6.30709	19.4829	0	0	15.5228	0	6.50927	0	0	0	0	0	0	0	0	15.0464	17.1532	0	18.4781	0	0
3.12493	5.9839	13.0423	0	0	12.3232	0	0	17.4213	0	0	14.1937	6.61914	14.2857	33.4794	13.473	0	0	0	13.1429	12.68	0	44.0017	18.1743	0	0	19.3372	0	0	5.42485	16.8625	17.4722	10.271	0	0	0	0	16.9673	0	0	0	0	0	19.3379	9.93357	7.85378	0	33.3333	14.8352	11.3705
0	0	0	0	2.14289	8.7037	0	0	7.40014	0	6.01224	0	7.04116	20.5481	0	0	0	0	0	0	0	0	0	0	0	0	0	0	12.1665	0	0	0	4.91307	0	21.6474	6.76034	8.0408	0	53.702	0	30.6955	23.9498	27.3953	0	0	7.39921	12.9158	0	0	0
0	5.85685	0	0	0	7.96608	15.1666	0	8.3993	18.6311	0	8.4941	0	0	0	2.41689	0	0	11.6866	0	0	31.2558	0	7.31073	6.90262	0	7.25045	0	0	11.3607	0	0	8.79152	0.814451	6.42202	19.3384	0	0	0	0	0	0	8.7823	0	3.76278	0	0	27.1401	0	27.5717
3.03627	0	0	0	0	0	0	12.3525	0	0	0	0	0	0	11.4037	0	18.1829	0	0	9.28067	0	0	5.49966	0	0	0	6.08539	0	11.7677	0	3.0962	12.0072	0	0	0	18.8282	25.0791	8.28688	0	0	29.4048	17.3359	0	0	18.1455	0	11.4933	0	14.5748	0
0	0	0	0	0	0	14.4172	0	0	31.3182	0	0	0	0	10.686	0	0	0	33.3333	0	0	0	0	0	0	0	0	0	0	0	0	0	0	0	23.6127	0	0	20.6324	0	46.363	0	0	0	17.3873	0	15.7945	0	0	45.4756	0
0	27.4765	0	24.6603	0	49.9969	0	29.3489	0	0	18.7241	11.5361	0	48.2671	0	0	0	0	29.2276	54.6776	0	0	0	26.0226	0	0	27.1247	33.3333	0	0	0	33.3333	0	0	6.63947	17.0467	0	0	0	33.3333	0	35.973	21.0692	15.23	13.5575	0	21.7391	63.1134	0	0
96.9637	66.6667	100	66.6667	97.8571	16.8239	41.0365	37.6475	67.0934	29.2698	49.5599	46.83	55.1931	0	44.5771	85.1023	81.8171	86.3818	21.6468	24.0527	95.9971	63.0439	88.9467	66.6667	89.0925	91.6282	44.9088	66.6667	69.064	80.669	59.9715	45.8426	58.4393	99.1855	0	23.1053	14.2052	25.0465	25.9732	0	35.9712	3.54275	0	0	29.5706	25.9341	20.4175	0	0	45.8002
0	0	0	0	0	0	9.82254	0	0	0	0	0	0	0	33.3333	0	0	0	0	0	0	0	0	0	0	0	0	0	0	0	30.2371	0	0	0	24.5307	0	25.5633	33.3333	0	0	0	0	9.73236	0	0	33.3333	21.84	6.19323	0	0
0	0	0	0	0	0	10.4635	0	17.1072	20.7809	0	22.5936	0	0	0	0	0	0	0	11.9891	0	0	0	0	0	0	6.20868	0	0	0	0	0	0	0	6.82076	0	10.2499	0	13.184	0	0	0	7.13084	46.304	15.1878	17.5388	0	0	18.7585	22.0878
0	0	0	0	0	0	0	0	0	0	25.7038	0	0	14.817	0	0	0	10.0562	0	0	0	0	0	0	0	0	0	0	0	7.97034	6.69521	0	23.0723	0	10.327	5.39478	0	12.7009	0	20.3037	3.92857	6.74392	0	18.1033	0	0	11.5942	3.5533	21.1911	0
0	0	0	8.67307	0	16.5094	9.09356	20.6511	0	0	0	10.5463	37.7658	16.3679	0	12.4808	0	3.56195	4.10571	0	4.00291	5.70029	5.55367	0	4.00483	8.37177	8.42204	0	7.0018	0	0	8.81686	4.78386	0	0	9.52633	16.8617	0	7.14084	0	0	12.4547	25.89	2.97536	19.7758	0	0	0	0	4.5403
0	0	17.714	0	7.16353	15.2673	0	0	0	20.5821	0	0	0	0	17.1988	0	0	0	0	0	9.37123	2.51642	14.1132	0	20.3365	0	5.63709	33.3333	38.4995	6.68093	0	0	0	5.83102	27.5654	4.09881	0	0	0	0	9.64126	0	0	0	0	14.6623	0	6.94184	15.4943	0
0	0	0	0	0	0	25.5979	50	0	0	2.29495	0	0	0	0	0	0	0	0	0	0	0	0	0	0	0	0	0	0	0	2.35447	0	20.0712	0	0	0	13.6484	0	11.1291	0	2.59048	0	20.4206	0	4.25191	0	11.0883	4.30773	0	0
4.27793	7.90803	0	6.89148	0	0	3.32838	0	7.912	8.00594	18.0186	47.6426	0	10.0203	0	33.7113	0	0	0	2.78338	9.02972	0	0	0	20.1826	0	0	7.82705	0	3.64958	0	3.86935	0	0	0	25.4153	39.1408	0	28.4622	0	0	28.8816	0	0	0	11.8862	11.4202	0	0	28.8316
34.618	0	0	5.43006	0	0	0	0	13.988	0	0	0	0	0	0	0	0	0	0	0	0	5.94523	0	0	0	11.3985	0	0	15.2784	0	0	0	0	33.3333	51.1687	14.8073	0	43.3021	0	12.1059	43.573	0	0.876601	18.594	28.5927	20.9365	13.6296	59.7248	14.069	0
0	0	0	0	0	0	0	0	0	0	0	0	0	0	0	0	46.9522	0	0	0	0	0	66.6667	0	21.4703	0	0	0	0	0	0	0	0	0	0	25.9094	16.5907	33.3333	7.95905	33.3333	0	14.7507	25.4204	28.276	39.9568	0	0	14.327	28.0418	15.7681
0	33.3333	13.1098	0	0	0	14.7216	0	8.77248	15.3249	0	19.0241	74.496	0	0	32.9554	0	66.6667	11.4432	45.6318	0	0	19.2201	44.1031	13.1507	0	0	0	33.3333	0	0	0	18.3776	33.3333	0	0	0	0	0	10.6988	0	0	0	33.3333	0	0	6.63929	0	0	0
0	25.4253	30.0025	33.3333	92.8365	27.4238	30.005	9.43745	31.9087	0	23.6931	33.3333	0	28.4595	16.1346	0	0	0	0	30.55	23.9621	6.37206	0	19.2372	24.8599	88.6015	27.6962	25.5063	12.8888	33.7492	4.06903	0	33.3333	0	0	15.3419	13.7229	0	0	21.2274	0	0	0	0	0	0	13.3568	0	23.1305	16.6683
0	33.3333	0	54.3451	0	8.35955	0	0	0	0	0	0	0	0	0	0	0	0	0	0	0	0	0	0	0	0	33.3333	0	0	0	0	33.3333	0	0	0	14.4273	16.8972	0	52.4497	0	0	0	20.8256	19.7967	27.1986	31.0679	19.7038	0	19.2643	0
0	0	17.6016	0	0	0	0	0	0	56.087	24.955	0	0	11.8465	33.3333	0	53.0478	33.3333	33.3333	21.0349	57.6369	26.9613	0	22.5636	0	0	33.3333	33.3333	0	22.5869	33.3333	33.3333	0	27.5023	15.498	0	0	10.8884	0	0	30.1302	56.3677	32.4567	0	0	21.4472	15.6057	0	0	17.5652
61.104	0	21.5721	0	0	15.616	26.3472	40.5626	37.4188	0	31.0384	0	25.504	49.6737	33.3333	0	0	0	21.8902	0	0	58.205	0	14.0961	0	0	0	0	0	33.3333	26.9098	29.464	28.2178	0	5.7679	0	0	12.4762	0	22.6345	14.0651	0	0	0	0	0	8.55634	14.6986	0	21.1668
0	0	0	33.3333	29.7698	0	0	0	25.4595	33.3333	0	0	55.8937	0	26.2813	0	0	0	0	0	0	0	0	0	0	0	0	0	24.3194	27.3364	0	0	30.5254	0	0	0	50.7668	26.657	0	5.93678	0	0	28.4967	0	0	0	0	46.9409	19.5085	0
33.3333	93.1891	92.3188	63.6158	66.6667	54.7126	40.7217	47.4171	22.5979	19.8405	46.405	86.3766	0	27.8014	48.549	93.9082	86.6852	95.4967	55.9652	84.038	93.377	55.9237	91.9758	88.5252	83.5746	96.9486	93.627	87.6472	60.3571	33.3333	65.5468	48.5271	27.162	99.4588	30.6656	25.4491	26.3712	10.5879	4.79523	0	0	39.4138	0	21.9461	8.62355	0	16.3706	0	59.4101	29.4944
0	0	0	0	0	0	0	0	0	0	0	0	0	0	0	0	0	0	0	0	0	0	0	0	0	0	0	0	0	0	0	0	12.8411	0	8.97383	24.7899	0	0	20.1364	33.3333	48.2121	24.809	0	0	11.4532	18.2921	0	0	0	27.0775
0	0	0	0	0	0	0	0	0	33.3333	0	0	0	10.9325	0	0	0	0	0	0	0	0	0	0	0	0	0	0	0	0	0	0	0	0	0	0	11.7767	12.4539	52.3402	11.064	0	0	17.9174	11.3225	19.2103	33.3333	29.8704	21.3004	0	0
16.4271	0	6.73994	0	0	0	0	0	0	5.09123	0	0	0	0	0	0	0	0	0	0	0	0	0	0	0	0	0	0	0	0	0	0	0	0	0	12.2222	0	0	0	0	10.9976	0	15.3477	14.5158	0	0	0	0	13.8248	27.7892
0	0	0	0	0	0	4.01832	0	0	0	0	5.35223	15.8983	33.3333	0	6.09183	0	0	0	0	0	0	0	6.3152	2.77411	0	0	4.07682	0	0	0	10.9437	9.09901	0	0	17.6092	0	0	0	0	0	0	0	0	24.7098	0	16.9628	0	0	0
0	6.81094	0	0	3.56354	10.7389	0	52.5829	10.7354	0	13.5246	8.27116	6.71607	22.4008	0	0	13.3148	0	39.5853	0	2.75229	0	3.02255	0	0	0	6.37303	3.80249	6.30959	33.3333	0	33.3333	0	0	57.6928	8.54348	0	0	0	0	0	7.87306	4.83665	0	14.123	14.4795	0	6.82508	7.25653	0
50.2395	0	0.941236	3.05087	0	34.5485	33.3333	0	33.3333	8.40162	9.82219	0	0	5.53191	14.608	0	0	4.50333	4.44949	15.962	0	37.8397	5.00167	1.42584	10.9076	3.05143	0	0	0	5.99697	34.4532	0	2.8079	0.54125	2.66772	0	0.539286	20.8794	22.7282	0	18.4545	19.3798	0	11.3873	0	0	3.46298	12.9007	0	9.38307
0	0	0	0	0	0	0	0	0	0	0	0	0	0	0	0	0	0	0	0	3.87069	0	0	0	0	0	0	0	9.01391	0	0	7.19587	11.3933	0	0	0	0	0	0	33.3333	0	8.52437	17.9856	18.8175	21.8802	15.0412	0	12.033	0	0
0	0	0	0	0	0	21.9266	0	7.87386	0	30.2481	0	21.4919	0	10.5616	0	0	0	0	0	0	6.23654	0	3.73372	2.74362	0	0	4.47352	0	0	0	0	6.17132	0	0	11.3862	10.546	29.4218	0	16.3326	22.3358	0	15.4159	22.0108	0	18.8538	0	0	0	6.25579
0	0	12.1781	15.2261	0	4.54181	0	43.0494	0	0	0	0	0	21.2731	14.4439	6.00194	0	0	22.8304	13.0932	0	0	0	0	0	0	13.9903	0	0	0	0	0	0	6.59652	0	0	2.81423	0	0	0	0	2.02469	0	0	26.9298	13.7239	18.5243	21.4712	10.1715	0
7.94231	0	0	0	0	0	0	0	0	33.3333	0	0	0	0	0	0	0	0	0	0	0	0	25.5816	5.35399	0	0	0	0	33.3333	0	0	19.9389	0	0	0	10.0137	0	9.8628	7.54137	10.1199	0	12.5256	0	0	0	0	0	0	0	18.4808
14.7462	26.0762	21.2648	0	15.4296	20.4641	0	0	45.6208	16.5097	0	53.3063	20.5002	17.5875	0	0	0	33.3333	0	0	0	0	28.6866	12.5448	33.3333	24.8064	0	16.9635	47.5004	62.6571	33.3333	0	24.2233	45.0287	28.0475	21.1632	33.3333	0	0	0	13.7598	0	17.11	7.69046	12.6644	0	35.0056	0	14.4857	0
45.406	66.6667	28.2224	25.6069	27.7116	55.6929	86.4109	14.6443	33.3333	24.3876	48.3508	33.3333	34.2768	33.3333	66.6667	45.7449	100	43.5666	38.3855	79.4213	61.0575	96.2662	22.3909	44.6399	28.2781	52.181	59.3203	58.257	0	33.3333	66.6667	21.2642	66.6667	26.7368	0	54.4908	42.2743	0	61.8732	0	0	0	58.3452	18.2711	0	31.1833	0	33.3333	14.5418	66.6667
0	0	0	0	0	0	0	0	0	0	0	0	0	0	18.8894	0	0	0	33.3333	0	0	0	0	0	0	0	0	0	0	0	0	16.1479	0	0	0	0	0	33.9896	7.34043	51.4735	33.3333	37.9753	0	34.999	0	0	0	0	11.3165	0
18.5872	0	18.2151	33.3333	40.7646	0	0	13.4437	14.5012	16.8237	0	7.41888	22.74	12.0603	0	12.3918	0	0	0	0	19.4589	0	0	13.4989	24.3126	0	0	16.3698	12.8416	0	0	0	0	0	17.3353	0	0	0	0	9.26836	48.9158	20.8077	0	0	22.0898	33.3333	14.8091	45.1954	18.8476	0
0	0	8.05108	25.8337	0	6.43191	0	19.9402	0	0	0	0	12.8331	15.7458	0	0	0	20.1009	0	0	0	0	7.75176	16.6728	0	0	13.9038	8.40971	0	4.00958	0	12.0691	9.10999	0	0	14.3323	0	33.3333	0	0	0	0	16.2233	0	33.3333	0	20.8592	0	0	14.8525
13.3184	7.25711	0	0	5.62171	0	0	8.92234	6.54465	8.94577	0	5.94146	9.64982	0	0	17.6062	0	0	5.45073	7.48556	19.4837	3.73379	15.5892	0	14.0759	0	12.7856	0	0	0	0	30.5798	0	12.6745	0	0	21.5781	0	4.79346	0	0	5.18519	0	0	0	8.77941	10.8018	0	0	0
0	0	12.0685	0	0	0	13.5891	0	0	0	8.96133	0	0	0	0	0	0	0	0	0	0	0	0	0	0	0	0	0	6.32469	0	0	0	0	8.9634	0	0	0	0	18.4515	13.9451	0	21.4815	8.32151	22.4809	0	0	0	0	0	0
0	0	0	0	10.4725	12.8692	0	0	0	0	42.6878	0	0	0	0	18.2551	0	2.99918	0	0	0	0	0	7.28963	0	23.0126	0	0	0	0	0	0	0	0	54.6172	0	0	22.8143	0	15.1932	3.99104	0	0	16.5585	4.9827	12.9801	0	0	30.6369	0
0	23.3142	21.6158	0	48.4045	0	22.7151	0	44.3011	16.5858	9.77937	0	0	14.7415	23.8585	0	0	0	19.6642	40.9151	6.03068	0	0	0	13.5398	0	42.507	0	26.5509	28.4632	11.2848	0	0	0	0	10.5174	11.9996	0	37.0527	21.8759	13.9386	0	0	0	0	33.3333	0	41.6494	13.7866	29.4303
36.7498	14.0761	20.5238	28.686	7.4625	40.0029	35.7094	65.5022	15.7847	23.9901	0	47.9942	61.7216	51.1188	49.5213	17.0982	59.7868	29.7116	43.3249	18.9615	22.1161	33.9814	62.2663	40.4402	16.8068	33.3333	33.3333	64.5237	49.9146	9.23077	24.5295	62.8576	74.4211	50.6847	0	12.9451	17.1338	0	0	0	0	0	42.0255	15.7796	17.8203	0	17.9938	0	0	0
0	0	26.0093	33.3333	0	0	0	0	0	0	0	0	0	0	0	21.1887	0	35.044	0	0	0	0	0	11.2298	0	0	0	0	0	0	0	0	0	0	53.4116	15.9153	0	0	0	27.7632	33.3333	23.0191	26.6066	0	0	47.909	31.3823	0	0	0
0	10.7165	0	0	10.3559	0	0	0	0	7.87997	9.35365	0	0	0	0	18.2352	0	0	7.31117	0	7.27179	33.3333	0	0	41.5035	19.636	24.1597	0	0	17.1017	5.49873	0	0	0	0	0	41.8782	18.9225	0	0	42.0686	0	0	0	5.92643	0	0	0	0	38.3397
0	0	0	0	0	0	0	0	0	5.99582	7.47764	0	0	12.8632	4.07223	0	14.0894	0	6.78071	0	0	11.3957	0	0	0	33.3333	0	0	0	10.3928	8.89429	0	0	0	21.4168	8.07726	1.55262	47.8744	0	3.7037	0	55.9152	0	33.3333	26.6007	0	0	9.81333	9.84095	0
24.3625	5.40108	0	0	0	0	0	0	0	0	0	4.0376	10.6407	0	0	0	0	0	0	0	0	4.74814	0	5.59984	0	0	0	16.3322	6.78244	0	5.5728	5.90855	11.3714	22.8766	0	0	0	0	0	0	4.78943	0	0	0	0	0	14.3572	5.10253	52.8801	0
19.7404	31.6506	7.32408	0	0	59.9971	0	0	19.3529	16.7475	33.3333	0	0	0	9.47487	16.2351	0	6.16106	20.2384	16.3836	0	0	10.1896	0	16.5266	0	0	0	0	0	16.5498	11.7317	0	18.5175	0	40.2339	0	0	31.9531	19.7035	0	10.3142	15.4712	50.8871	0	0	0	0	0	0
0	0	24.527	23.6277	18.2622	0	23.5932	0	0	16.2349	16.0763	0	3.39114	10.2811	3.51498	0	9.19599	0	0	9.36798	38.5199	0	15.1621	26.2265	0	13.6974	0	0	0	11.2645	0	0	14.2076	0	25.1716	0	0	0	19.648	0	0	0	15.8968	0	0	0	0	0	23.4924	0
0	0	0	14.353	0	0	10.6183	34.4978	12.2655	0	0	29.9798	0	0	0	15.0981	0	25.4616	2.6806	0	26.0615	0	0	0	11.6234	0	0	19.1441	0	7.00086	15.2979	0	0	0	0	0	12.7889	12.8647	9.96593	0	0	0	0	0	34.1395	18.7577	16.7148	28	0	0
19.1473	14.8415	0	0	15.515	0	7.36406	0	8.29589	12.5659	23.9797	17.9883	24.2465	10.9955	9.55817	12.1446	16.9278	3.62174	0	14.3718	0	16.5414	12.382	16.5037	0	0	0	0	16.7521	16.5462	12.3722	19.5022	0	7.92119	0	12.311	14.6469	20.3384	1.38022	26.9537	5.87002	10.7514	0	0	15.5131	0	19.5519	15.4347	0	32.2299
0	0	0	0	14.9294	0	0	0	0	0	20.9954	0	8.37539	14.9116	0	10.2422	0	0	27.2933	0	0	21.4684	8.29211	0	8.43267	43.428	33.9552	0	0	13.0875	0	0	0	33.0088	32.8827	4.08163	19.0842	0	0	10.853	0	21.1142	13.9423	0	0	43.4661	0	0	11.1402	0
22.8152	31.5409	67.2508	48.2745	29.4603	44.0748	33.3333	41.72	0	56.1616	0	0	0	33.3333	7.95796	0	0	32.8048	0	33.3333	32.6849	20.7162	0	0	10.8267	33.3333	29.4928	15.8303	42.4079	0	21.8661	39.8227	20.0467	0	13.8203	18.6667	0	11.754	12.0447	0	28.9235	0	11.698	17.008	0	0	0	0	0	0
0	0	0	0	0	10.2786	10.1236	23.6877	71.7436	0	0	20.807	33.3333	0	26.7489	13.8404	100	12.7516	20.2065	61.029	5.99724	0	0	30.1828	15.4722	0	0	17.7478	33.3333	4.03882	15.5328	0	0	0	0	0	0	7.8402	33.3333	0	0	33.3333	21.7116	2.46734	33.3333	0	17.6724	18.2064	21.1826	13.975
33.3333	0	0	0	0	0	18.3844	0	0	0	28.3127	17.6581	0	27.6635	0	8.45209	0	0	0	0	0	0	13.5224	0	31.0408	0	8.00182	0	0	0	0	0	0	21.0202	0	8.74671	16.7211	23.8039	0	0	20.0578	17.5595	0	0	0	17.3184	36.1166	0	2.93678	5.02326
0	33.3333	0	25.1235	0	6.6107	0	0	0	0	0	0	58.2913	0	0	33.3333	0	41.1482	39.3734	0	16.9257	33.3333	0	0	0	8.05524	0	0	10.2672	0	44.8006	0	48.6279	0	7.56799	12.7891	0	0	8.2939	13.8953	11.6181	0	15.2122	11.8899	0	8.63597	0	33.3333	0	0
33.3333	0	27.0927	0	33.3333	0	0	0	6.20973	10.5051	50.6919	12.5264	0	7.31991	21.654	0	0	0	0	0	0	0	0	8.71882	17.8612	0	7.32792	8.07273	13.9916	41.941	0	18.5129	13.2867	16.8867	0	0	0	21.7728	29.7984	29.6164	9.01652	0	0	0	33.3333	0	0	33.3333	44.7708	15.2467
10.5182	29.7237	0	0	18.4039	31.4008	23.2097	34.5923	7.22896	0	0	0	0	16.7717	25.3754	14.6391	0	0	0	0	27.3361	8.52359	78.1855	0	0	12.0924	3.84057	37.1387	0	0	0	8.33104	0	0	16.0995	0	14.2491	0	0	0	0	12.2192	11.6217	11.0414	33.3333	0	12.0095	15.127	12.1507	28.3101
0	0	0	20.7677	0	7.63504	14.9489	0	0	33.3333	0	15.6752	0	0	0	0	0	13.2954	13.1269	5.63771	16.4077	0	0	33.3333	0	0	17.3817	9.4303	0	0	0	33.3333	18.0388	16.7712	10.1166	14.6667	33.3333	0	16.5297	33.3333	0	0	0	13.946	0	0	0	0	0	19.3583
0	5.40207	5.65646	5.83435	3.87302	0	0	0	0	0	0	33.3333	0	0	18.2637	19.493	0	0	0	0	0.64843	0	0	0	16.3664	3.09104	0	11.7802	0	40.9327	17.8006	0	0	12.3132	0	0	16.6123	0	0	0	13.2755	0	21.6354	18.2241	0	30.5795	15.6609	0	7.81893	0
0	0	0	0	0	0	0	0	14.8177	0	0	0	0	0	0	0	0	0	0	0	0	15.9585	0	27.765	0	0	0	0	0	0	0	0	0	0	19.5131	41.0492	0	34.8291	0	12.3019	17.1085	15.7738	4.17888	25.4233	0	0	18.5406	0	0	18.0866
0	35.2863	0	0	0	12.1725	13.9105	0	0	0	0	0	18.9639	0	0	0	0	31.3439	13.8209	0	0	0	0	0	0	0	0	0	0	0	16.7526	0	0	0	15.4528	4.77178	16.5677	0	18.5271	0	20.2653	0	0	0	15.4723	20.0501	0	0	17.0413	20.8044
99.4906	0	100	83.8911	96.4534	15.2816	46.0805	0	10.9856	87.0713	79.35	47.506	30.6802	59.8134	66.6667	47.4482	100	26.645	0	53.9418	98.0567	0	93.4246	0	100	88.7883	92.2683	82.8689	95.7641	95.999	0	94.5434	95.8563	92.3587	4.47958	0	0	0	0	37.285	18.6526	0	0	0	0	0	0	33.3333	0	0
0	0	0	0	0	0	0	0	51.7115	0	0	0	0	0	23.1887	25.1628	0	0	66.6667	0	0	45.514	0	21.3191	0	0	0	0	0	0	23.0196	0	0	0	0	0	4.85105	0	0	0	0	15.4754	6.12503	42.1176	34.3748	16.0218	21.3456	42.1899	0	0
0	38.2222	0	0	0	36.9611	19.4228	88.406	22.3477	0	9.8855	31.2301	47.7028	12.2578	0	0	0	16.6877	19.5125	24.9514	0	10.7826	0	26.0645	0	0	0	0	0	0	27.019	0	0	0	14.1122	12.6272	30.4813	0	55.4295	20.0763	0	0	8.26271	0	0	0	9.51081	0	9.95621	33.3333
0	0	0	0	0	0	14.218	0	0	0	0	0	0	12.5443	0	0	0	0	0	0	0	0	0	0	0	0	0	0	0	0	0	0	0	7.64127	0	13.5978	0	9.50764	14.8062	0	22.9238	28.598	33.3333	28.7886	0	4.9228	14.5833	0	29.79	0
0	7.56553	0	4.60539	1.89563	5.81756	0	0	12.5677	0	4.13093	0	0	0	0	19.2184	0	0	0	0	0	0	0	12.0142	0	4.71418	0	0	4.23591	1.98331	0	0	2.99268	0	0	0	0	50.8439	0	0	13.068	0	0	0	5.75156	33.3333	11.9878	0	12.0175	33.3333
0.509421	5.67879	0	0	0.283154	7.52035	0	0	0	3.82665	0	12.2693	0	0	0	0	0	0	0	0	0	30.0721	0.31877	33.3333	0	6.4975	1.35749	17.1311	0	0	7.16933	0	0	0	17.8806	0	0	0	0	0	0	17.8579	4.5305	0	0	13.2832	23.8225	9.18385	0	0
0	0	0	6.09741	0	2.88598	0	11.594	0	5.11781	2.46382	8.99456	0	3.8866	0	8.17052	0	23.334	0	6.7403	0	0	0	0	0	0	0	0	0	2.0177	0	0	1.151	0	35.4286	0	25.726	0	0	29.3817	0	33.3333	0	0	18.7056	0	18.75	0	11.6564	12.529
0	8.43785	0	0	1.36783	0	6.36824	0	2.38749	0	4.16974	0	2.65318	1.93111	10.1447	0	0	1.98944	0	14.3666	0	0	1.11884	0	0	0	0	0	0	0	10.3137	0	0	0	0	20.7061	0	23.8257	0	0	10.4095	0	47.7484	12.4097	13.5863	12.3887	0	0	3.54331	0
0	4.80931	0	5.40614	0	19.3608	0	0	0	3.98423	0	0	0	9.56673	0	0	0	0	0	0	1.94331	13.6313	5.13782	7.2688	0	0	6.37421	0	0	0	15.7258	5.4566	0	0	12.6462	48.297	22.374	15.8228	11.2371	13.2571	14.6807	4.73538	0	16.684	12.1095	0	0	15.2929	15.9953	0
0	14.534	5.18343	0	6.1653	0	28.643	70.3481	0	21.7719	33.8186	13.0929	39.8634	0	13.8907	15.649	11.2775	2.60417	14.2137	0	11.7699	4.67422	0	4.20033	4.76842	11.5123	8.37822	19.8098	21.788	3.51213	11.493	0	7.01469	4.75144	26.8374	0	0	0	0	0	23.12	0	0	12.9269	0	0	0	41.628	4.49607	15.8625
12.7191	0	15.3117	0	0	14.5938	0	0	10.4096	0	14.926	5.64402	0	0	11.6595	4.70414	0	0	17.6627	0	0	0	34.4071	0	6.49113	0	0	19.2557	0	8.768	0	12.963	0	0	0	18.6855	0	0	0	16.1341	0	7.67407	22.1455	0	0	5.70991	13.0728	0	9.88372	19.4444
7.96253	0	0	0	0	18.3734	0	0	0	0	0	0	0	13.5948	13.178	0	0	35.8104	0	0	0	11.0957	0	5.90808	13.613	16.6766	0	24.48	15.2999	9.11406	0	20.4965	0	13.4881	0	0	14.4062	0	22.1539	0	0	0	2.00306	15.0534	30.2986	11.1947	10.1791	0	0	0
8.39283	12.7936	15.0896	0	0	0	6.40895	15.7602	0	12.0291	0	7.28657	0	0	9.29288	9.58743	0	5.43935	0	0	0	0	0	5.711	10.5065	0	0	0	13.077	0	0	14.4037	21.0128	8.21487	16.5298	0	0	18.4636	13.7288	15.2935	0	0	0	17.1004	0	0	0	0	19.9541	0
0	7.82483	15.9535	25.4607	0	0	0	0	0	0	12.3112	0	19.4122	0	0	26.6704	0	0	16.6864	33.3333	8.05525	19.8608	18.2696	0	0	6.27261	55.9571	13.5235	0	19.7661	14.3635	0	29.2282	21.2489	16.6546	9.37061	34.8558	0	19.1296	0	24.3663	15.0351	11.315	0	15.4414	0	17.9267	33.3333	10.7281	22.3418
5.74746	14.8699	8.35793	66.6667	77.073	33.3333	0	0	43.862	0	11.0666	26.416	0	17.6141	0	0	26.55	20.5638	4.45196	50.6498	19.3064	0	0	25.0814	11.8764	13.1973	0	0	6.28556	39.0402	33.3333	0	0	10.2421	9.06185	33.3333	0	33.3333	0	0	5.01792	33.3333	33.3333	20.4064	0	21.255	8.05885	0	23.4496	27.1833
13.7257	10.9745	0	0	0	0	16.4874	0	33.3333	16.5434	0	5.93801	13.4862	27.9439	11.7791	0	0	8.28713	0	0	21.5635	0	0	0	0	0	0	14.397	11.9632	0	21.8404	31.7243	0	0	0	0	0	33.3333	19.6045	33.3333	0	0	0	16.233	8.85122	27.6234	0	0	0	0
24.9405	0	0	7.87263	0	14.9599	15.7553	0	12.3951	0	0	0	0	0	21.4388	0	0	0	10.6753	0	0	0	19.6531	0	28.5649	0	20.9516	0	11.7478	0	0	0	0	0	14.1128	14.6478	18.9271	0	14.2038	35.2391	32.0767	0	0	0	17.8919	34.2171	38.5608	25.0387	0	0
19.6233	39.0032	9.66372	0	0	18.7396	26.9244	0	0	43.2992	27.8776	8.48303	17.6305	15.7193	0	19.0418	62.1725	10.2925	21.6422	7.88783	39.305	0	0	0	16.3357	21.7427	0	0	6.26342	0	0	12.8368	11.1162	28.3634	16.8035	0	20.0532	0	0	0	10.2133	25.6593	0	0	0	0	0	0	18.1092	4.17639
6.88852	0	30.4401	0	16.7617	0	5.78098	13.8917	0	6.35633	0	33.1395	9.60778	25.128	18.7609	24.3473	0	17.0027	14.6677	8.12905	0	64.3692	27.6702	59.0992	7.844	30.5985	14.7131	8.53398	13.5749	19.7995	18.9698	7.57576	31.6281	13.6912	0	23.9627	11.7577	14.8698	11.1794	0	5.20578	18.2982	31.2031	18.28	27.5168	0	12.2017	0	13.3793	10.9915
0	0	0	11.5539	9.00191	10.291	0	29.1387	10.788	0	0	0	11.1201	0	0	0	0	21.196	0	0	4.82562	0	0	0	0	0	9.42172	16.6178	0	2.90444	40.3675	0	0	0	0	0	0	11.499	0	0	0	21.9689	0	18.1427	3.7265	0	0	42.034	0	33.3333
4.53883	19.1506	4.39411	0	0	7.08312	34.51	0	4.25722	8.61334	15.1533	7.15813	0	10.9353	5.04757	0	0	7.30631	0	12.7212	14.1634	0	0	0	13.9882	0	4.81218	7.19607	0	0	0	12.7208	0	15.6	31.0697	10.7196	0	0	23.7544	22.3298	21.58	0	0	0	9.07504	21.0239	0	0	0	11.1981
0	0	4.95199	3.47888	0.955056	7.62462	0	20.9145	9.09124	0	5.72645	0	0	0	0	6.22309	0	0	4.12686	0	0	0	5.56293	0	0	0	0	0	14.8898	0	0	15.4055	9.00121	10.1595	13.5216	0	0	17.1467	0	10.3322	15.7873	0	14.9955	23.227	0	4.64853	25.2343	0	30.0535	0
0	10.904	4.93806	0	0	0	11.9799	0	0	13.1512	0	0	12.9761	0	0	30.9998	0	0	16.9771	0	7.8208	16.999	13.9107	19.2742	28.3415	0	0	21.442	20.7031	0	0	10.4021	0	0	0	18.6297	34.0453	22.1731	58.9307	24.0018	3.38785	40.6848	0	0	35.134	19.0677	0	0	33.3333	0
25.1264	8.96785	0	0	0	0	0	0	0	7.83079	0	24.1135	6.05091	33.3333	0	0	0	0	17.1797	33.3333	0	15.7278	0	0	9.61904	11.6209	0	0	0	6.73347	0	0	10.1981	0	0	7.47576	33.3333	0	0	0	0	0	28.4679	0	0	0	0	13.6926	0	13.7365
0	0	0	0	0	0	0	0	0	0	0	0	0	0	0	0	0	0	0	0	0	0	0	0	0	0	0	0	0	0	0	0	22.3546	13.7062	5.83569	0	0	0	0	10.4585	0	0	0	11.8762	0	0	12.3253	14.1422	0	0
33.3333	25.1392	46.1604	33.3333	32.3783	67.0268	25.7325	0	0	36.8975	27.6069	33.3333	0	13.801	0	0	0	0	11.7304	17.9156	21.5007	0	33.3333	23.3819	0	0	52.0071	16.1799	0	57.0288	9.63347	0	0	18.5109	0	14.7036	0	18.0546	7.73598	11.0035	11.7534	0	0	0	38.9875	12.3094	0	0	16.1495	22.1352
14.4704	35.8383	28.3953	51.6339	57.6648	0	21.3535	40.5369	66.3729	25.5025	51.5134	19.9522	69.8529	33.3333	83.1285	49.9889	100	62.6631	32.5098	0	19.1317	55.615	31.0232	39.3799	48.0513	71.1283	23.9116	29.1402	39.462	33.3333	40.5198	40.859	37.2116	0	0	33.3333	18.8983	0	0	9.3315	33.2175	25.9818	18.3378	0	0	0	33.3333	0	0	0
0	0	0	0	0	0	0	0	0	0	0	0	0	0	0	0	0	0	0	0	0	0	0	0	0	0	0	0	24.9451	0	0	20.6126	0	17.7333	29.7613	0	13.7231	16.1866	0	0	0	0	0	10.1064	0	28.6848	18.2388	10.4905	20.4637	0
22.5311	0	11.1602	0	0	7.97445	6.4242	9.40997	9.49061	8.00455	0	15.4428	0	8.59703	11.8239	12.7882	0	8.83461	17.4761	36.0298	32.5578	11.6582	16.1699	17.9641	0	17.2508	9.84734	9.42407	0	0	9.47921	0	21.2345	24.29	19.8117	15.138	0	14.9399	9.57895	12.5426	14.274	11.3644	38.1987	36.6477	13.0769	14.2657	10.8683	19.6407	0	19.5968
8.58692	43.1388	0	0	0	0	23.2373	8.24519	0	22.9964	0	0	0	14.5859	0	3.56508	0	0	31.2244	16.1115	0	12.4243	0	0	0	0	22.9033	15.3997	0	0	13.1832	0	0	0	0	22.6314	7.10602	0	18.5728	14.1027	0	12.8848	0	0	0	0	0	15.4702	17.7061	18.8472
0	0	18.3821	8.99567	20.5461	27.9048	20.5858	0	14.3718	35.7391	5.2794	52.3026	7.16637	11.0278	0	8.23953	0	9.58779	0	0	0	6.21427	18.42	12.4238	15.2465	4.87894	2.84348	0	4.20377	12.6635	11.8821	0	7.37561	0	0	0	5.09868	0	0	0	21.5376	0	0	23.0197	0	25.1693	8.83598	0	14.1493	0
0	0	0	7.14922	0	33.3333	0	0	15.3457	0	0	0	10.9302	0	0	0	0	12.9019	0	0	0	0	0	0	16.5358	0	0	0	0	8.35817	0	36.0673	0	13.9892	12.1635	0	0	0	0	9.23931	33.3333	18.6447	0	0	0	0	0	0	0	0
14.9994	13.608	0	24.5844	0	3.16544	0	0	0	0	3.73308	0	0	0	0	0	0	0	0	9.84242	16.7809	0	0	0	0	0	0	0	0	0	0	0	11.3321	0	33.3333	9.55859	21.8164	82.7682	21.51	13.3503	0	0	20.7103	0	0	0	33.3333	0	0	33.3333
0	21.3854	50.5892	0	0	0	27.7263	16.1254	0	0	0	0	19.7194	14.2222	33.3333	25.0938	0	0	13.2456	0	14.3195	10.45	0	0	0	36.1497	9.72262	0	9.76559	0	17.6664	0	0	18.357	0	0	0	0	33.3333	22.0096	0	0	15.773	32.4959	44.4184	0	42.2057	0	48.9606	32.9199
58.0797	16.1057	0	50.5218	18.3456	11.4269	0	14.3227	17.0354	10.3369	26.742	16.9483	18.2904	55.6389	42.9875	41.1127	0	74.8196	9.22356	66.6667	18.292	12.3473	9.93699	87.5762	33.3333	0	33.3333	57.5334	48.8114	54.0031	27.7467	32.691	29.8479	47.1423	19.0214	47.3983	0	0	14.7605	0	23.9193	33.3333	21.6158	28.3638	8.75451	8.16399	0	56.0612	0	0
0	5.7621	0	0	27.775	0	7.48807	0	17.9263	4.6176	0	13.9249	0	0	0	0	64.0453	0	0	7.37939	0	27.1191	33.3333	0	8.26951	0	10.43	0	0	15.846	0	8.89456	18.155	0	0	0	39.3139	0	0	13.6903	0	0	0	11.1511	0	25.8264	0	0	19.184	0
0	0	8.36643	0	33.3333	0	0	0	0	15.381	0	0	13.6139	4.52525	0	0	0	0	43.3172	0	0	0	21.0447	0	0	0	0	0	0	0	0	0	22.0013	14.9764	0	0	11.517	0	11.8234	0	0	35.1372	0	0	24.5788	0	15.625	0	0	7.96101
0	0	0	0	0	0	0	0	0	0	0	0	17.1463	0	0	0	0	0	2.98931	0	0	0	0	0	0	0	0	0	0	0	19.7115	0	0	0	0	0	0	0	0	27.6078	0	0	24.3405	0	0	0	0	0	0	6.93855
18.3339	0	22.6623	8.74896	0	24.1695	20.9625	61.3067	35.3208	10.929	64.2456	16.8243	13.1335	0	23.6791	21.9889	35.9547	2.69075	0	0	50.6075	31.445	17.2651	0	26.6148	58.9714	20.7672	27.0669	37.2192	9.12921	9.81007	22.3471	11.2882	5.53518	35.4818	20.4116	15.148	17.2318	0	0	21.2098	0	17.5603	4.9695	22.2483	40.8402	0	28.4686	0	0
54.8112	72.2294	25.2948	5.45224	0	50.7461	63.1428	0	0	16.1299	0	16.9324	0	53.4537	54.0315	44.233	0	9.26173	0	15.1528	0	0	26.4765	12.4464	18.9401	0	37.8644	56.0703	15.0988	0	0	35.881	0	0	6.43087	0	16.9129	21.5587	22.9462	31.4934	23.2507	8.21993	13.8539	19.0816	0	0	9.482	0	41.9507	43.3016
0	0	0	0	0	0	0	0	0	22.0289	0	0	0	0	0	0	0	0	0	0	0	9.85052	0	8.39658	0	0	0	0	0	0	18.2976	0	0	0	0	0	0	20.1754	31.7765	0	11.1359	0	5.35714	0	0	0	11.2349	20.4888	3.82409	0
0	0	0	10.0729	9.65035	0	0	0	0	17.813	0	0	21.2728	0	0	0	100	14.3154	7.4577	41.1057	0	14.1078	0	18.7798	16.8456	0	0	0	0	12.4029	13.5516	0	26.6613	0	0	36.9691	19.8606	12.6399	0	0	0	16.9161	0	5.64645	19.1857	0	0	33.3333	0	28.6083
0	6.44749	0	61.2144	19.2968	0	0	0	44.1035	0	0	20.3721	11.0986	19.6275	0	0	0	12.4402	19.4108	0	24.356	0	11.3032	5.35175	15.8426	6.87301	9.09823	0	14.5866	18.8616	11.4673	20.2075	33.3333	3.07195	0	26.5804	0	0	0	0	0	0	14.7436	6.21837	6.40681	8.49625	18.2622	0	6.1008	0
33.3333	0	0	0	0	0	0	0	33.3333	7.24172	0	0	33.3333	3.92306	0	0	0	18.1001	0	0	22.9729	0	0	24.9368	5.48666	33.3333	0	4.03812	33.3333	0	0	0	33.3333	0	26.9025	0	0	0	0	14.7976	0	13.7315	0	17.952	0	0	13.345	0	29.5092	0
0	0	36.7678	9.74798	23.683	16.5186	0	0	0	11.3045	0	12.9612	0	0	0	0	0	14.9183	50.8783	6.86048	0	19.2255	0	0	0	0	8.92774	33.3333	0	33.3333	0	0	0	0	14.7077	0	16.4204	0	14.9133	0	34.9879	29.9266	19.4794	27.115	14.1476	53.1673	0	33.3333	0	0
0	7.21918	0	0	20.0915	0	0	50	9.1492	15.5204	13.5013	49.7343	24.7416	13.7058	0	2.84945	0	0	0	13.3199	0	23.4828	37.6896	6.84056	10.2726	20.9216	0	0	16.9752	13.3106	19.7818	10.5782	0	96.928	12.0148	0	0	0	19.9768	48.7809	0	2.77778	27.9762	0	33.3333	9.3027	22.0985	12.8446	12.5674	0
5.42269	3.73536	8.03857	0	14.0365	6.01488	33.3333	50	0	0	0	0	0	0	0	40.2588	0	20.8932	13.9226	0	27.0825	33.3333	0	0	8.90657	33.3333	10.7763	5.51467	0	14.4717	15.0357	33.3333	6.67205	0	0	0	46.806	38.3668	10.3871	0	22.1974	0	18.5897	0	26.9265	0	15.0712	0	6.04775	28.0901
0	10.3686	19.313	13.5124	0	0	0	0	0	9.96172	0	0	0	0	0	0	0	5.97148	0	0	10.3605	0	0	14.5535	16.4877	0	33.3333	1.04355	20.0061	0	0	0	0	0	0	11.5994	0	0	0	4.92806	0	0	0	14.6455	0	13.4994	10.5063	0	0	0
6.43281	0	10.5859	0	13.2418	26.7204	3.52386	0	13.414	0	19.8321	0	9.5536	9.28994	12.6352	12.6588	0	4.09968	8.33064	23.5611	15.2282	0	24.5307	8.69462	7.21809	5.53875	0	0	0	7.61984	21.8661	0	0	0	39.9441	24.8511	0	7.25922	0	0	8.42807	28.428	0	9.3412	0	15.5344	0	0	0	0
0	30.5876	0	15.7096	5.47864	0	15.1942	9.42673	11.0755	6.58442	12.7142	16.8655	0	5.52079	21.8712	0	0	0	0	0	0	18.2298	4.56019	0	0	17.9922	8.17476	13.7801	4.68248	9.55191	7.72479	6.62847	0	0	0	0	0	0	0	13.9944	0	11.624	14.7489	13.4262	0	25.3776	0	18.7527	19.4511	10.2847
4.59703	0	6.60692	0	0	0	0	0	9.05006	11.6995	0	0	24.7403	0	0	7.9978	22.2719	18.3952	0	0	0	7.46222	0	0	8.73393	0	13.401	0	26.5998	0	0	7.96417	29.5497	25.2877	21.3241	0	42.2612	0	0	0	0	0	12.1894	0	6.29944	0	0	0	0	0
7.7483	0	16.0676	0	0	0	0	0	0	9.59133	0	0	0	37.2028	0	0	0	0	37.2221	15.2505	7.17146	0	4.81498	24.4126	4.34494	5.34411	0	18.974	0	0	9.57449	0	0	0	0	0	0	26.2064	58.0381	15.134	31.303	0	0	13.0749	39.7417	0	39.5899	33.3333	6.65658	0
0	28.3858	0	18.5513	12.6341	15.2132	32.6437	29.2334	19.7727	0	0	11.1825	13.2062	0	20.1355	17.6516	0	0	0	21.6875	0	0	0	0	0	13.2883	0	8.50524	0	20.5048	25.984	38.583	0	0	20.8235	58.4849	0	33.3333	0	0	0	0	0	0	0	0	0	23.2987	0	37.2655
0	0	11.694	15.9443	0	33.3333	18.8955	23.6913	7.98635	6.47681	0	7.06112	12.218	16.1248	22.7758	10.9844	0	17.042	17.2105	33.3333	0	13.7656	0	0	0	0	17.0334	0	0	0	7.60681	0	30.0477	39.8943	0	0	0	0	0	19.3389	33.3333	0	28.826	35.2008	27.0339	0	0	0	0	0
0	14.3384	0	17.6237	16.2971	0	0	0	8.65782	20.5933	63.6713	0	0	6.62749	11.4621	0	0	23.0428	0	0	33.3333	16.0108	0	0	24.5994	27.9892	0	0	10.2372	0	0	9.61998	0	0	0	0	33.3333	0	8.77498	33.3333	0	16.8894	0	0	0	36.0248	22.2076	14.5806	0	32.9233
58.9184	0	21.6393	0	54.0326	42.5016	0	0	13.5607	0	0	33.3333	0	0	0	15.6817	0	12.9053	0	6.82507	25.2892	0	57.2915	55.1432	28.9884	25.8827	61.3909	20.293	0	63.2691	6.62986	0	0	23.5561	0	33.3333	0	0	0	0	0	21.7093	0	0	8.49611	0	0	0	20.837	0
0	21.7406	17.2657	7.18046	0	0	14.4379	0	16.2969	38.899	0	31.5575	49.8355	22.8364	13.1978	33.3333	77.7281	0	0	11.6458	26.1619	26.6704	33.3333	0	33.3333	0	0	25.0823	58.4806	0	5.81533	37.2044	20.9037	0	0	0	8.5089	33.3333	21.8712	5.52777	0	33.3333	4.50729	20.2585	6.74071	0	0	0	53.0553	0
0	0	26.7264	0	0	8.95188	18.8288	16.882	0	0	23.6144	0	0	11.6878	10.5576	14.3512	0	16.9393	14.821	0	0	12.1056	0	0	0	9.50342	0	13.3654	0	0	7.34936	0	0	11.262	57.8524	3.73377	0	0	0	0	12.3913	0	39.7283	7.70847	0	24.0333	13.2961	10.0347	0	0
28.7363	4.94757	0	24.9906	11.5575	0	0	20.7666	13.6	6.15566	0	0	0	0	0	0	0	11.6753	30.7464	11.2578	8.0441	5.75568	0	20.4441	0	0	0	0	0	6.67412	29.3154	0	19.499	0	0	4.44797	15.8965	7.12695	11.3157	12.6715	22.9724	16.444	0	10.3311	11.6881	14.5643	24.9063	0	0	19.5265
0	21.8259	0	0	0	0	0	0	0	0	0	28.9571	10.0901	0	0	0	0	0	0	0	0	0	0	0	11.0061	0	0	0	0	0	0	0	0	0	0	0	0	0	0	13.4999	11.8774	5.83581	0	0	19.5513	0	0	19.5482	0	0
24.6888	0	30.8547	8.65586	30.7943	5.23573	19.9966	13.1386	29.801	21.2804	21.6492	0	7.93142	30.9014	47.5894	34.194	0	33.7457	9.69075	22.4563	21.7429	14.8433	36.9573	9.71553	0	28.8071	17.1937	21.8766	41.1287	19.6644	0	25.4127	13.929	13.3361	0	14.1274	0	34.3457	0	0	12.6199	8.82298	14.5428	1.7872	0	0	0	47.7931	0	0
26.3367	0	24.7927	0	11.5267	44.9047	43.6281	34.6701	0	20.9808	55.5214	15.488	12.4406	22.0188	18.7444	25.2216	0	16.6472	5.74074	0	37.0265	0	0	18.8881	23.1112	38.8375	35.8876	44.5525	17.7201	11.7097	21.0807	41.4096	17.5528	0	12.9631	23.6953	18.582	33.3333	0	0	0	0	26.5012	0	15.655	9.21625	0	0	0	15.6026
0	42.5191	0	19.8977	0	0	0	0	0	13.5356	0	13.6046	0	17.8377	0	0	0	0	0	0	0	19.1374	0	5.22768	10.122	0	0	0	0	13.2611	0	0	0	21.6688	18.8942	17.7499	0	0	30.7011	53.6079	23.2286	11.5424	0	40.2113	0	22.1088	18.0014	0	31.0329	34.5792
0	0	18.5721	0	0	6.33144	0	0	14.5208	0	0	0	0	0	0	0	100	0	4.0316	21.873	0	16.5648	22.6895	0	0	0	0	0	0	0	0	0	7.74075	0	7.54325	0	0	0	33.3333	12.5976	0	16.1391	0	0	23.9088	0	12.5623	0	0	0
23.5118	6.65942	0	21.8503	3.40862	0	13.3367	15.5393	12.3666	0	0	0	0	0	0	11.4356	0	26.4992	0	22.2436	5.45343	7.43294	0	10.0359	12.4563	12.856	0	16.4119	18.384	0	0	4.47184	15.7805	0	0	0	36.3155	19.126	0	0	0	0	14.3614	18.2045	0	0	0	10.1732	0	14.9463
16.8182	0	0	15.8561	47.2771	16.4873	0	0	11.9393	0	3.54571	0	0	11.3146	14.8148	0	0	0	13.8572	0	23.8358	14.1959	0	0	24.8141	0	24.5198	0	0	21.6236	14.8002	0	33.3333	0	21.8235	9.638	0	0	0	0	18.8611	24.5104	44.5946	0	0	21.3831	0	0	37.8846	0
0	11.1618	17.2399	0	6.9933	5.27463	9.93037	0	0	0	0	17.8453	44.136	6.68915	0	21.0371	0	0	51.2352	10.9807	6.13703	11.0571	10.6891	0	12.2053	0	0	0	0	24.6484	0	6.32612	0	44.9978	14.4391	8.46414	0	13.1949	35.9656	13.0588	21.4559	0	0	7.09282	40.885	11.2245	51.1922	9.92908	20.4742	2.78441
8.64454	12.9857	8.54067	0	0	0	13.1082	0	31.3723	24.4055	7.59957	24.105	25.4019	0	14.5889	0	0	23.1079	0	22.4464	0	16.7686	29.6641	32.5149	6.28509	19.4994	12.2874	11.4568	22.7672	9.09273	33.3333	15.7341	11.6636	19.9972	24.3368	0	0	0	0	0	11.9571	11.3584	0	19.3625	0	16.0228	18.2442	8.94444	0	17.4797
0	4.84801	0	33.7401	0	21.7662	0	36.652	0	19.7977	11.6842	0	0	11.2384	4.26243	8.11176	0	0	15.4445	0	5.80431	0	0	23.6178	0	0	10.1115	5.70231	0	0	30.7857	6.64562	0	0	0	26.3252	45.1026	0	0	7.23581	0	21.791	0	13.3416	0	20.0445	0	3.61201	10.6082	14.6078
0	0	0	0	0	17.2992	9.05752	0	0	0	0	0	0	0	0	0	0	2.81799	0	24.7041	0	11.6126	0	0	0	0	0	0	0	0	14.5132	0	0	0	0	12.4487	0	23.8272	0	13.2477	25.0661	11.6596	3.24334	0	0	0	0	0	0	16.0454
0	0	0	0	0	0	0	0	19.5426	4.97995	0	8.32532	0	2.7541	12.1035	14.7193	0	0	0	0	0	15.1909	0	0	0	1.34006	0	0	0	1.75225	0	3.20905	0	0	0	0	0	0	32.1587	21.5078	0	12.2198	15.5641	22.6313	16.3097	10.1275	0	0	0	0
0	4.44773	0	12.0096	0	0	12.3396	0	0	0	9.93033	5.37837	0	0	0	0	0	0	13.8756	0	0	0	0	4.56938	0	10.1693	0	0	0	0	0	0	0	0	0	0	0	8.94986	0	0	38.7473	0	33.894	0	11.4111	8.94309	20.2226	39.1838	0	0
7.17475	16.1951	3.92311	0	5.92186	0	0	42.8784	10.903	0	20.5887	0	14.1417	7.83044	21.0665	11.7072	12.4637	6.00753	8.61519	50.9602	2.10914	0	5.7074	0	6.57398	2.25549	9.17308	7.53891	21.5344	3.3106	0	0	14.8705	16.0006	35.5842	11.7845	14.2901	0	28.5559	0	0	0	0	0	0	0	60.2661	8.47184	45.0985	0
0	18.2269	0	3.82345	2.66161	11.636	11.4579	0	0	0	12.0544	6.38758	0	7.02404	5.49776	6.89675	0	17.2034	9.90496	16.3375	6.34447	24.8334	66.6667	29.3986	9.55466	0	11.4876	38.692	0	1.53757	0	13.9504	22.255	6.5569	27.2568	0	18.0653	8.31032	0	0	0	0	6.8299	33.3333	20.284	0	0	0	0	11.7758
0	7.86327	1.97254	2.04226	0	8.23444	0	0	36.2603	8.58264	0	7.12228	15.5812	15.2718	0	5.74885	0	0	0	0	0	0	0	0	0	2.73911	0	0	0	0	20.2277	0	0	0	0	20.8847	0	0	0	28.0722	0	21.1135	0	21.5553	21.9223	0	0	0	33.3333	8.97626
0	17.1382	0	0	0	0	0	0	0	6.39322	2.86037	0	0	0	6.14801	0	8.19717	0	0	0	0	33.3333	0	33.3333	0	0	0	0	0	31.8774	0	0	0	0	0	21.5488	3.07898	0	11.2748	20.0857	0	33.2963	0	0	17.0237	57.7236	0	11.1236	0	17.2879
0	0	0	0	0	0	0	0	0	0	0	0	0	0	0	5.52323	0	0	0	7.99824	0	0	0	0	0	0	0	0	0	0	52.1535	0	0	0	6.07652	33.3333	0	22.7503	28.0105	0	19.7376	0	0	22.48	0	23.2059	0	0	0	0
30.8028	36.1288	0	82.1247	0	49.6134	23.0426	34.3338	17.8854	80.0442	34.0236	0	17.7522	22.7488	15.732	48.4665	0	16.1299	19.4577	0	0	3.66546	0	0	53.7103	0	79.3393	0	49.4716	0	13.1056	0	44.4117	25.0366	31.0825	0	64.5657	0	0	17.0867	8.18182	0	10.9393	0	0	0	6.40053	0	0	24.3571
62.0224	0	94.1044	0	91.4165	13.2169	44.1024	22.7878	15.4087	0	20.5426	72.7864	52.5249	44.3709	39.4521	6.93816	79.3391	57.8412	48.1465	0	91.5464	11.3643	27.6259	32.6986	30.1611	83.496	0	53.7691	28.994	61.5222	0	82.8405	18.4629	52.4059	0	0	0	36.1623	0	0	8.26727	21.7107	29.5293	0	13.0493	0	13.1108	41.2208	21.5681	21.5575
0	0	0	0	0	0	0	0	19.5154	0	13.7438	0	0	0	0	0	0	0	0	44.8145	0	0	61.2055	0	0	0	0	23.3685	0	0	0	0	0	0	0	0	0	0	0	2.02492	0	0	0	31.5611	13.2006	0	0	0	4.64345	0
25.1815	12.8794	0	13.7301	0	0	0	0	14.2334	17.5074	0	0	0	7.61694	10.8345	16.3379	0	10.8678	0	0	0	18.617	0	0	45.7282	0	50.9588	0	0	21.381	0	0	51.0169	18.982	10.4737	14.0518	0	0	27.3574	5.58843	20.0288	13.2991	0	8.21995	0	0	24.0435	16.9962	9.13085	0
0	22.5825	0	0	0	0	0	0	0	0	17.863	0	0	0	0	0	0	0	0	7.35407	0	0	0	7.828	0	0	0	18.7388	0	0	0	0	0	0	0	0	17.5725	7.6972	0	0	0	18.7343	17.2505	0	0	0	0	19.754	0	66.6667
0	0	10.7196	14.2142	0	21.2852	0	0	0	0	0	0	10.8541	8.21572	0	0	0	0	8.88368	5.90586	0	20.8629	0	19.1525	0	0	0	0	6.98484	0	21.387	9.78471	0	11.2298	25.5158	26.8025	11.7112	22.5328	21.8839	18.3055	9.72622	0	0	0	1.97829	17.881	6.71264	0	7.46269	0
0	0	0	0	0	0	0	23.1096	0	0	0	0	0	0	5.81905	33.3333	0	0	0	0	0	0	0	13.9765	0	0	0	0	0	0	15.5381	33.3333	0	0	0	3.39548	0	33.3333	0	0	9.26269	0	0	15.5187	0	0	0	0	0	0
0	16.8203	23.6994	9.39758	16.4691	33.3333	78.8118	0	32.9179	15.8259	39.9533	0	22.836	0	44.6176	0	100	33.078	18.4058	16.4016	45.1206	18.498	0	0	33.3333	0	22.6586	5.44511	59.6818	45.2857	0	23.5486	33.3333	14.3513	0	0	33.3333	25.0881	11.9992	27.7449	12.8726	20.0342	32.2147	0	0	31.529	16.328	33.3333	0	0
74.8185	10.7508	33.3333	0	66.6667	33.3333	0	50	0	66.6667	20.1719	83.3733	0	0	0	50.3287	0	0	52.7713	25.5239	33.3333	12.4704	1.78422	8.6535	13.8271	90.1034	22.4598	0	33.3333	33.3333	22.9682	18.9353	0	27.6071	0	0	21.6221	0	0	31.3084	23.6071	33.3333	0	7.6799	20.1327	0	26.6207	0	24.2025	0
0	20.454	22.6137	52.4525	0	12.0481	0	26.8904	33.3333	0	0	0	46.4225	84.1673	27.5143	0	0	33.3333	0	0	0	0	3.67698	11.5289	7.11135	0	0	47.9279	0	0	31.7697	0	15.6498	0	64.0105	20.8366	15.7608	0	38.7595	0	0	14.599	40.5598	0	33.3333	17.2566	17.4905	29.9165	54.5605	0
0	16.513	9.63395	0	0	0	0	0	0	0	0	0	0	0	11.2147	0	0	0	0	0	0	29.5517	0	38.8607	0	0	0	0	0	0	0	0	0	0	0	19.0276	0	0	0	0	0	0	9.97504	14.1795	31.355	0	8.80469	0	0	0
0	0	0	10.2056	16.8643	0	21.1882	0	0	0	8.268	16.6267	19.8874	0	0	0	0	22.7209	19.9392	0	21.5461	0	0	0	0	9.89661	3.92289	4.51977	0	0	8.33713	14.398	0	27.8297	0	15.886	0	11.3486	0	15.0278	24.5025	0	0	22.8409	0	33.3333	0	0	0	33.3333
5.72404	0	7.55731	14.9203	5.90524	23.5637	14.5028	0	0	12.1685	16.4911	8.46722	0	6.20237	0	18.2336	0	0	0	0	0	18.4282	7.32443	0	9.81175	10.7303	0	8.91962	0	0	0	6.09427	6.41554	9.27306	0	0	0	0	12.2781	40.186	0	16.1282	8.76923	0	2.98747	0	0	18.8282	8.67062	0
10.701	0	9.17728	0	6.1248	9.57057	3.29479	0	6.69593	0	0	3.57454	13.5844	0	10.7534	0	0	0	0	21.6834	12.9142	0	10.4273	4.1466	0	0	0	0	0	0	0	0	14.2957	0	0	0	0	33.3333	30.294	0	11.3642	0	0	0	0	17.5682	12.5516	5.40701	19.8758	33.3333
0	29.5433	11.0906	0	0	0	0	0	11.3222	0	6.00009	8.08055	14.2839	17.3745	20.1814	15.6367	39.8111	0	14.7156	0	0	28.1986	0	13.1642	0	19.0891	13.2442	13.1451	0	0	4.48323	0	28.0825	0	36.1157	0	15.8746	18.5802	0	0	0	48.6381	48.7246	0	0	11.0379	0	0	0	0
0	16.8458	0	0	0	11.5523	14.2117	15.0121	33.4157	32.3168	9.5876	0	0	18.0887	0	10.2852	0	33.3333	0	0	0	0	0	0	14.0137	0	0	0	0	0	0	0	0	26.2666	0	33.529	54.2245	15.956	3.93604	0	39.808	0	0	7.13664	25.1175	0	0	30.8775	16.9264	18.1427
24.3542	0	0	0	0	0	0	0	0	0	28.9336	22.3663	0	6.56361	5.13848	0	0	23.0699	8.10365	24.2274	33.3333	0	33.3333	8.12199	33.0936	33.3333	48.3616	0	0	33.3333	28.8501	58.4872	25.3363	0	0	0	0	0	17.261	5.84795	0	15.9808	9.16239	66.6667	0	0	0	0	0	33.3333
31.2576	0	13.3616	75.0643	81.1668	0	19.3695	0	22.0112	8.6615	14.5161	0	8.15923	0	0	0	0	0	8.38964	17.3561	53.7525	0	19.2905	0	9.40856	20.3497	20.0891	40.9882	19.5898	66.6667	66.6667	0	0	5.34544	0	20.506	0	14.7531	0	4.36359	0	0	0	26.1967	0	0	66.6667	19.7142	0	0
0	12.7382	22.2427	0	0	23.7628	9.59526	50	19.4977	0	0	11.0638	33.3333	15.2447	33.3333	25.7885	60.1889	0	22.5366	0	0	21.018	0	0	0	0	0	20.1882	58.562	0	0	0	0	17.8301	20.6631	0	12.4422	0	0	0	0	0	5.80626	0	0	52.4541	0	0	13.4576	0
18.4699	22.6624	25.776	0	0	0	9.78126	12.2427	0	30.7913	7.25467	17.0146	0	0	0	17.6966	0	0	0	21.6278	0	14.9051	18.1451	33.3333	23.7613	0	7.36488	0	0	0	0	0	25.87	0	25.3435	12.8273	0	0	20.8795	19.5834	24.1189	0	2.10256	0	33.3333	0	20.7817	9.64131	3.52581	0
0	0	10.7944	10.0154	0	31.5506	13.9638	0	7.05737	16.0619	17.217	29.433	11.5897	36.5262	30.5933	0	0	17.0042	22.0991	15.1052	0	17.45	0	21.0647	0	16.4976	10.9402	16.7589	0	0	0	35.4185	0	27.9879	0	33.1377	0	0	11.5571	8.72718	24.7088	18.0286	12.1358	0	17.1081	0	0	0	0	0
9.49316	18.2102	0	0	6.80313	0	15.2808	22.7452	0	0	0	0	19.0494	0	0	12.3594	0	26.5925	24.1554	0	0	0	11.4793	20.1692	9.91103	0	0	0	21.8482	0	0	0	0	13.2969	17.8777	0	17.4587	17.3773	3.79417	21.2919	0	1.22436	13.2991	0	21.4536	18.9397	0	15.5318	37.5439	15.1907
0	0	8.35465	0	16.4969	0	0	0	0	0	10.7966	0	15.4602	0	0	0	0	0	0	7.53623	13.2927	0	20.1139	7.96945	9.68705	10.2947	4.98718	0	0	4.80634	2.1097	14.97	9.74872	11.344	0	0	24.5562	0	0	0	8.09894	0	0	13.7908	0	0	3.89761	10.7531	0	11.5854
0	15.1817	0	0	0	8.60419	21.6624	0	27.2957	7.56983	0	0	33.3333	10.7834	10.2068	12.6002	0	33.3333	0	0	0	0	0	0	0	5.07731	0	0	20.2055	0	0	0	8.99594	0	13.5076	16.5265	0	19.3406	0	18.7916	9.34544	16.9604	0	46.8096	0	36.5072	1.82174	12.8442	0	21.0253
34.2295	0	8.98834	11.9522	11.6462	9.97603	0	0	0	0	7.32206	79.1563	0	0	15.414	0	0	11.0553	10.0207	0	0	20.3697	0	0	6.04808	0	22.3778	16.4264	0	3.40354	9.99767	0	23.1445	0	28.8811	31.407	0	0	15.0806	0	0	0	33.0983	0	0	0	33.3333	0	0	0
0	0	13.6421	0	8.5528	0	33.3333	39.6737	8.4269	0	12.7921	0	9.96662	14.4235	0	11.5077	41.5891	0	0	0	20.9704	36.5014	4.51977	37.7489	21.1326	0	0	0	3.29199	11.646	37.3978	39.4872	12.5554	14.3827	0	0	0	23.4398	15.5382	0	19.6223	0	0	0	31.7187	8.64996	35.8784	0	15.7723	0
0	33.3333	0	0	0	0	0	0	0	2.7112	3.4678	0	0	6.61878	6.15165	0	0	0	18.3779	19.0543	7.27235	0	0	0	0	0	8.41206	20.0398	15.0463	0	0	0	5.74549	0	33.3333	0	7.62845	33.3333	0	8.64198	0	16.3061	0	0	0	0	0	0	0	17.6301
8.13603	0	4.61534	22.0959	0	4.22346	0	0	0	8.5995	5.2669	0	0	0	0	9.31086	0	33.3333	0	0	0	0	0	0	8.36688	8.5457	0	19.9858	10.5741	0	15.1515	4.46543	0	0	0	21.1549	0	0	0	0	0	0	0	0	11.3299	16.0857	0	18.2754	33.3333	24.729
0	44.3945	0	0	0	0	6.29098	0	0	0	0	0	0	0	0	0	0	22.278	0	0	0	21.0054	0	7.58588	0	16.179	0	0	0	0	6.29961	0	0	0	19.8257	16.8069	52.9592	0	21.9512	0	11.5021	0	17.8008	7.01353	0	0	0	0	33.3333	0
0	0	24.345	32.6186	24.7805	23.3573	16.6202	23.7376	0	33.3333	19.069	0	33.3333	20.1599	0	0	0	0	0	24.2014	58.4645	0	18.7153	13.2094	0	0	19.3525	13.2935	0	50.2143	0	0	29.6212	33.3333	0	6.8317	0	2.07684	0	0	0	16.3729	0	11.5973	0	0	0	33.3333	0	0
38.2318	0	19.6913	33.3333	38.5235	53.839	0	0	43.3572	27.4787	41.2856	20.8437	7.90653	29.1046	41.0459	37.8372	58.4109	0	71.6015	33.3333	0	0	33.3333	0	54.7654	23.0386	24.9364	30.2545	32.5951	29.9298	6.13884	41.0773	10.1889	14.616	4.45221	0	14.8562	0	0	14.5417	38.9454	50.3606	0	0	34.948	0	25.0689	0	0	15.7033
19.4027	7.09041	20.3633	0	0	0	22.0931	36.5887	20.9202	20.3074	0	0	0	18.9099	27.1817	28.744	0	0	0	15.8747	0	22.1235	23.3177	33.4864	0	36.8646	19.9341	0	18.287	0	22.9049	0	0	26.3239	0	7.27308	0	21.8095	47.43	58.0247	12.4858	0	49.1009	20.7888	22.0034	38.7572	0	24.794	17.561	9.32701
27.607	0	0	39.4451	0	22.2671	12.379	18.2047	0	0	0	58.2313	31.3684	0	0	0	0	6.4697	0	13.0243	0	0	21.6536	13.9059	7.04438	0	0	14.4286	11.9789	14.6472	0	0	0	18.0203	0	3.34728	17.0911	0	0	0	0	0	8.52155	15.3789	0	0	4.92227	0	15.1176	0
33.3333	0	0	0	28.4447	0	13.8264	0	8.68239	23.5898	23.4459	0	33.3333	0	13.793	32.8621	0	25.9785	0	9.58663	0	3.89029	18.8116	0	18.9324	23.4879	0	26.8242	12.6196	0	10.5411	0	41.0713	0	0	18.3358	0	20.9779	0	13.6673	0	4.63127	0	0	10.6159	0	0	0	0	0
25.7297	13.5125	17.2819	0	0	0	0	0	38.0637	0	0	21.604	0	8.34668	0	0	0	0	0	0	37.6252	18.6009	0	0	0	16.8579	24.7246	0	0	0	0	43.7257	11.3269	12.9356	83.1933	0	0	0	23.5111	15.7299	38.1485	13.5487	0	20.2431	0	34.8614	17.0387	33.3333	0	10.0321
0	33.3333	18.0556	0	12.2642	16.1225	11.1255	47.8812	0	0	33.3333	8.43533	15.5731	23.3367	0	0	100	0	33.3333	0	0	0	0	7.57788	41.034	0	0	9.78393	23.4993	0	0	0	0	0	0	29.9861	20.9244	0	0	0	0	0	0	0	17.43	14.5657	9.44401	21.9964	8.90995	31.8068
0	0	0	6.34455	0	44.3995	1.39231	0	10.5399	11.6507	0	0	0	31.5852	8.69922	0	0	25.3772	33.9078	10.2959	19.7003	0	0	33.3333	0	18.0961	0	0	20.7138	0	0	24.1236	0	6.57481	0	0	0	0	3.11994	0	33.3333	16.3971	0	0	0	0	0	0	10.6883	0
0	33.3333	0	33.3333	0	0	0	0	0	43.0769	21.6696	0	19.7252	0	33.3333	33.8045	0	26.8636	0	23.7467	0	29.443	14.6807	0	0	6.47086	66.6667	18.9047	0	0	33.3333	8.41304	0	0	0	0	31.52	56.811	6.96932	0	0	14.233	25.8238	33.3333	4.0381	0	0	0	16.4528	0
0	0	0	0	0	17.2108	9.82884	7.32154	7.92387	0	6.55468	0	0	0	0	5.68816	0	0	0	5.82919	0	14.7325	18.1703	25.7555	12.0746	0	0	23.5494	6.18443	0	22.7922	0	15.048	20.3978	0	44.0362	0	0	0	0	15.0463	0	0	11.2197	33.3333	11.5311	16.2946	11.3369	0	23.3012
5.72634	0	0	20.877	53.144	0	0	0	5.338	0	0	0	0	14.477	0	0	0	0	10.1742	4.79198	29.0415	33.3333	18.6526	19.4275	0	15.2372	8.60872	6.50912	17.0401	85.3528	0	9.20977	10.5474	8.73822	0	0	0	0	0	70.6028	13.4718	19.7846	0	0	34.5827	20.2742	33.3333	33.3333	9.47584	19.8848
7.60364	19.8209	16.0514	0	0	0	0	0	0	0	0	0	0	9.94236	24.5807	0	0	15.311	15.8663	0	13.633	0	8.03113	0	0	19.85	0	0	0	0	33.3333	4.42555	0	0	0	0	30.4645	12.3554	21.8033	0	0	14.469	48.1288	13.0903	0	0	18.9671	0	39.3556	0
0	0	15.2778	0	6.14715	0	18.1146	26.5926	29.4522	21.6826	14.9964	11.7293	0	12.3121	19.5938	27.6452	0	0	6.71829	32.7253	0	0	0	0	20.9146	0	0	0	7.96397	0	0	10.1024	22.0064	0	16.8067	4.29458	0	9.85562	44.5963	0	0	16.9362	17.5259	6.73475	0	18.7676	0	0	0	14.9751
6.91522	0	0	10.0499	0	30.2994	24.2834	43.7672	28.8985	15.4356	41.9393	35.1314	53.3925	20.3989	30.0107	43.5272	39.9382	25.7377	16.7122	29.3674	15.1474	11.5285	15.8471	14.7286	0	4.07306	18.6051	28.7681	12.109	0	0	12.2424	19.9055	13.5343	19.7687	0	0	27.4708	0	8.50945	20.4804	0	0	14.6217	18.6888	0	23.5446	0	0	2.65259
31.3527	16.7987	7.00819	10.1487	10.8611	25.5838	0	0	0	0	0	0	0	9.40955	0	0	0	0	0	0	21.1579	15.8937	0	10.7048	6.45405	6.71161	15.6434	0	0	0	12.683	18.3209	0	28.2865	0	29.8249	38.4968	0	0	0	0	0	0	20.4585	28.2569	19.1383	0	16.5996	3.55969	11.5746
0	5.47914	15.3993	0	25.4194	0	0	0	33.3333	25.8621	0	9.29198	0	0	33.3333	19.908	0	19.0977	20.8633	0	0	0	0	0	0	0	0	0	0	56.6824	8.60243	0	12.3666	11.2018	14.6434	0	0	23.4512	20.5882	33.3867	12.8319	14.3234	0	0	18.8802	0	0	18.192	0	24.6992
8.3668	0	12.3581	10.949	0	11.7551	8.56903	0	13.8796	25.1682	0	0	0	20.6725	28.3952	0	0	0	34.6732	14.0555	18.186	13.6995	11.3091	0	0	34.1801	0	14.7564	15.2845	20.4999	26.8478	0	3.94426	0	0	6.36273	11.1147	0	33.3333	0	22.7934	7.8903	20.09	0	0	0	43.4457	16.1674	33.3333	0
8.26625	0	0	13.1269	0	11.4174	34.5134	30.9856	0	0	0	0	3.22331	23.9238	0	0	26.0247	6.77535	0	18.1955	29.4414	0	0	10.7284	0	14.9591	0	0	0	0	10.9017	0	0	0	0	0	14.6013	16.947	0	4.83092	0	0	5.89865	0	0	0	0	0	27.0354	0
0	33.3333	11.5819	18.2446	32.4353	0	0	0	0	12.4075	15.3603	24.0414	9.02998	12.9344	0	0	0	18.4542	0	0	0	25.0722	58.0382	0	15.8633	0	12.7739	13.7874	0	0	0	19.3961	19.3105	0	13.5646	7.57105	0	5.86252	12.7451	0	23.3929	0	33.3333	0	14.6445	66.6667	0	0	0	30.6807
7.72835	40.3058	0	0	0	0	0	0	4.43488	7.47126	33.3333	18.7411	15.3398	12.6609	3.32263	13.7312	0	15.6994	12.47	0	0	8.10535	0	41.7045	37.0417	0	14.9548	26.6738	15.2205	12.8334	0	0	23.5064	19.799	33.3333	0	9.66495	26.2685	33.3333	0	0	72.2322	0	33.3333	0	0	17.8523	0	16.78	3.16112
18.1519	0	13.967	12.3344	13.9291	17.8422	14.7721	6.23281	19.4538	0	0	0	12.1454	0	0	22.8336	8.98043	0	6.799	19.2778	16.0674	8.26117	7.9037	11.9001	0	14.3012	17.6899	0	0	9.98431	9.74866	0	0	27.1784	0	21.55	0	0	0	15.1882	0	0	0	0	5.07639	0	0	18.7408	0	21.7587
19.2189	0	33.3333	20.2064	0	3.10203	10.0073	0	0	0	9.36708	0	0	0	0	0	0	14.2356	8.48231	19.1038	0	17.4396	0	0	40.6409	25.775	0	0	47.3908	0	31.2164	15.0124	20.9668	0	0	0	13.5686	0	0	0	20.5014	0	40.678	31.5865	14.4531	14.195	2.04806	16.7337	0	5.47299
0	4.08303	6.35211	4.94005	17.3552	0	7.85467	19.0144	0	13.6554	0	12.7941	6.86896	0	4.9381	0	25.0566	0	0	0	0	0	6.90188	10.2335	0	0	20.3329	16.0143	9.99514	0	0	35.0281	0	0	18.6899	34.6912	12.5537	0	0	38.0847	0	5.55414	0	0	0	0	13.1093	13.5665	19.2915	0
0	0	8.78888	0	0	4.06413	0	0	0	6.64714	0	55.025	0	18.0846	0	0	0	0	3.51147	7.25961	7.79171	11.588	0	11.9608	0	0	0	10.4459	0	0	9.95063	0	0	23.0492	0	0	0	0	16.9553	0	0	0	0	0	25.4683	0	0	0	24.4986	0
14.1758	21.8568	0	11.0332	21.1762	8.68372	18.1228	0	12.2765	0	7.25778	0	0	0	15.5198	0	0	25.1902	6.09582	0	0	13.3199	25.4447	0	21.7036	0	19.1921	15.5644	22.1006	0	4.5574	0	19.9017	5.8683	16.5756	0	24.279	63.7071	19.8168	0	52.9742	20.3481	0	0	7.9566	0	9.95539	0	3.8864	28.384
0	7.64825	14.1017	10.3711	0	17.5843	18.9249	0	20.9587	20.2667	0	0	0	0	0	16.5438	69.3632	0	0	14.2978	20.8789	15.6623	18.6294	0	0	22.8017	0	0	0	22.2571	0	14.059	0	20.1311	0	0	15.0465	0	14.497	13.5047	0	0	22.0877	37.1278	0	16.1822	0	0	0	0
29.2011	0	33.3333	0	0	20.6376	0	85.6553	20.374	21.6321	54.4803	0	15.0996	36.6353	0	30.9868	0	13.0607	0	30.7344	15.5971	0	0	10.2214	11.1298	21.1626	0	37.3113	0	33.3333	0	33.3333	27.7003	0	32.3775	16.0161	19.2902	0	16.378	25.7168	0	58.2581	0	12.8225	11.688	0	14.5934	13.3952	33.3333	16.8183
33.3333	22.6705	33.3333	0	25.7775	0	24.1135	0	8.18675	0	0	33.3333	0	0	19.8039	0	0	0	14.2092	0	0	0	0	0	22.0619	11.7345	21.9988	0	8.43314	33.3333	28.7759	20.9732	0	3.5948	0	13.5441	0	0	3.5076	0	13.4153	0	28.3454	0	0	47.8646	0	33.3333	8.83474	0
0	5.56304	0	70.2963	0	15.749	0	0	0	0	26.0756	0	56.1497	0	33.3333	6.41706	0	0	21.9446	19.0356	16.1644	20.7985	4.4794	0	10.1783	0	14.1413	0	20.7132	0	23.3827	0	0	0	0	0	27.3412	0	0	17.3092	0	0	0	0	22.6944	0	41.6444	15.7804	11.2307	31.718
0	0	0	0	0	24.6496	0	0	19.3949	22.2351	0	8.26174	0	7.38774	13.5295	13.8183	0	11.5008	46.3617	14.2371	27.4141	0	24.6836	33.3333	0	0	0	0	33.3333	0	0	5.06765	31.0109	31.6189	0	45.2783	0	0	0	19.8287	0	0	0	0	0	17.1512	0	0	0	0
19.1576	5.72084	0	0	12.1571	0	29.6189	0	12.9594	16.1523	0	3.3799	18.2337	37.8923	0	0	30.6368	0	0	8.31388	0	17.6711	14.704	25.8283	9.20576	21.5989	0	36.6784	4.40971	0	33.3333	0	0	0	27.5569	0	0	12.9481	9.20447	7.61657	8.23179	21.3938	32.4972	29.5388	15.3864	0	18.7399	0	0	0
0	20.122	10.4427	0	7.55582	8.63162	9.21986	14.3447	0	13.0667	12.1864	0	0	0	0	26.0437	0	38.3695	7.87731	0	12.1538	20.9603	12.059	0	0	22.7023	0	0	0	11.0762	0	26.5668	0	0	23.49	5.37228	14.0431	0	0	0	0	0	17.0697	0	16.8063	0	0	17.5529	0	0
4.13223	16.4186	0	8.29935	33.3333	0	0	0	5.84989	0	0	0	10.517	0	17.8135	6.19022	0	11.8788	0	6.12171	0	0	0	18.6562	25.7206	0	44.6679	0	11.01	0	0	0	21.3871	15.7377	0	19.7892	0	23.3448	19.6408	16.0241	25.3788	0	0	20.5108	0	18.8021	15.0669	19.9382	18.2162	23.0797
22.5979	12.5954	13.847	38.7838	0	22.5475	0	0	11.9168	7.76034	14.5786	11.1111	11.6741	16.7328	1.34519	0	0	0	30.0488	0	0	0	6.46724	0	0	0	0	12.6542	0	49.6142	5.84361	0	0	17.7716	0	0	0	13.4538	0	9.65781	0	0	10.499	0	20.3573	11.0747	0	0	23.4538	0
0	13.223	9.20764	0	36.9149	17.3624	16.4763	12.4925	6.5085	46.132	11.8931	0	6.20919	0	17.4967	8.3522	62.6459	0	29.1352	30.166	31.8273	9.74769	3.26092	25.8331	11.2773	0	33.3596	16.5307	31.7064	0	16.1285	26.4319	25.4367	0	32.9761	20.7517	27.227	0	24.7083	21.3365	0	36.3536	21.1257	33.4744	10.8232	0	25.5472	0	0	14.4261
10.5611	0	0	12.3565	15.6052	0	25.1093	37.931	22.7244	0	0	16.7977	0	30.3362	11.3585	21.3596	0	11.5252	0	18.4433	24.6553	12.9575	0	17.537	0	47.7833	0	3.9665	0	9.93396	15.152	22.5988	0	15.5959	7.31596	0	0	0	0	0	10.7212	0	0	0	18.1315	22.3584	15.5138	61.1697	11.0312	0
17.8924	23.5537	33.3333	0	0	0	0	0	7.90698	0	0	28.5077	0	5.27181	0	23.8521	0	25.9565	0	0	0	33.3333	26.3536	0	15.9897	0	0	33.3333	0	0	17.2048	0	8.45166	0	0	0	21.1117	4.67585	21.0857	0	0	0	0	0	0	0	0	0	0	0
4.21815	36.2361	0	0	0	20.1446	0	17.8622	15.4459	25.573	24.6027	0	33.3333	0	0	24.9811	0	0	13.9975	0	0	9.39846	0	10.5536	0	11.888	0	0	0	0	13.2169	0	11.2727	0	0	33.3333	0	54.4928	33.3333	5.10392	16.034	0	33.3333	0	0	29.7093	19.6588	20.5329	0	39.4431
0	0	24.1257	0	0	0	9.88034	0	0	0	21.4402	0	12.7428	8.18842	9.92698	0	0	0	0	8.71987	0	0	0	23.2966	29.6494	14.9095	16.872	16.7127	7.83901	5.44918	0	10.8647	11.5764	0	0	0	0	0	0	0	0	27.434	0	6.89655	0	0	0	0	11.8732	0
22.7723	0	0	7.84459	19.3119	10.7859	0	12.069	13.5095	0	0	28.396	0	0	0	0	0	10.6529	0	0	20.3418	9.52381	26.8515	0	14.0578	0	33.3333	16.8026	33.3333	0	0	0	0	0	56.1197	33.3333	5.88508	0	12.2476	57.0089	55.9454	15.3713	22.8344	0	27.9545	0	0	0	9.27758	0
6.51731	0	19.4864	32.0096	10.4399	16.0618	40.1307	19.6454	21.9878	20.5347	12.5023	15.1875	21.6593	36.3305	44.036	4.74455	37.3541	0	15.1879	33.524	23.1756	14.1872	9.6928	0	21.0275	15.2965	16.4351	0	19.9569	31.0973	32.4541	29.3127	2.78252	33.3333	0	0	0	15.2037	0	0	17.2993	0	12.2077	33.3333	0	36.8575	31.4941	4.56989	33.3333	0
15.441	9.7796	0	0	17.7281	0	8.40342	0	0	0	14.9831	0	0	0	0	0	0	19.5227	0	0	0	10.8521	0	22.7797	0	0	0	0	0	3.90538	0	0	15.2832	33.2992	3.5882	12.5817	12.2216	0	8.62506	0	0	20.8411	0	11.4257	12.976	0	0	13.7275	0	28.9984
0	4.61214	0	9.00553	0	13.0979	0	0	0	0	0	0	14.3813	3.14026	15.8367	16.7105	0	32.3427	11.6305	9.14675	0	0	27.374	0	7.99823	10.1227	0	0	7.16433	0	0	10.792	25.1967	0	0	0	33.5546	12.1739	0	6.89292	0	0	0	14.8699	9.75744	0	7.78616	0	11.0309	17.1324
0	0	0	0	0	0	7.67892	10.3347	0	8.99611	4.63933	33.3333	17.1534	0	0	14.8511	0	0	0	0	0	7.70716	0	11.135	13.7505	0	7.55471	15.8839	16.8372	0	7.67091	0	0	6.87806	0	0	0	18.1386	0	9.35441	8.37548	0	7.09828	0	0	15.5666	10.5982	13.5533	0	0
0	17.8898	0	2.37699	0	0	0	0	0	7.40553	26.1866	8.41567	0	0	14.7112	0	26.7851	0	0	4.79081	33.4848	0	0	17.4586	0	10.3574	0	10.5086	10.0329	0	13.4367	18.2267	23.7573	15.2448	0	20.9265	0	0	21.1794	7.02239	0	14.1352	0	12.6735	16.2241	19.5666	0	0	0	0
37.9269	10.7604	0	0	27.6903	11.1407	25.6256	0	34.4697	7.9475	0	10.4328	18.7702	0	0	9.09492	0	0	16.3251	0	0	15.1748	11.6889	20.9636	0	20.0746	33.3333	0	0	32.3976	24.2803	0	0	0	2.88529	0	10.7527	0	18.1086	0	20.2299	0	11.9784	0	21.8534	0	5.67867	0	0	26.5521
13.5816	0	39.2037	33.3333	0	0	0	50	0	10.0359	0	0	6.11681	45.7892	18.3499	15.5785	0	21.154	19.918	7.95207	0	16.0925	33.3333	0	0	18.3289	12.9179	14.5727	29.6637	0	0	0	0	15.5489	12.747	0	16.8354	37.3562	0	0	0	19.2666	0	33.3333	0	0	33.3333	18.1842	4.22242	28.2686
0	33.3333	0	0	0	8.53217	39.3748	0	0	14.064	14.0241	5.37454	0	25.9129	17.4303	0	0	0	0	11.1647	0	0	33.3333	23.8269	66.6667	0	0	17.4494	0	0	13.8188	0	0	0	11.4203	0	33.3333	7.07032	33.3333	37.1972	32.7606	0	47.2373	22.2948	0	11.8103	0	0	17.7909	0
19.6783	22.573	33.3333	30.9563	20.8611	19.9209	0	39.6653	33.3333	0	23.8025	0	0	0	0	21.9849	0	0	24.5512	33.3333	18.6129	20.5542	0	12.3697	0	0	10.8602	0	10.1328	56.5219	0	26.0606	0	11.409	30.448	0	9.30406	0	0	23.9789	0	0	0	0	33.3333	26.4914	0	46.7775	29.1109	0
14.269	15.4436	14.6461	33.3333	26.8139	4.86037	0	0	0	0	0	31.2916	10.0631	0	0	0	0	50.4618	0	0	0	9.53371	0	0	11.6683	14.7285	21.4383	5.85453	33.3333	0	0	0	76.2427	0	0	36.6459	0	0	15.2247	0	0	33.3333	0	11.0385	11.4799	26.565	27.6547	13.3604	33.3333	7.62274
0	0	0	0	0	22.1926	0	0	19.9778	30.4157	31.3474	0	47.8965	0	14.9834	17.7548	73.2149	28.3843	13.4154	42.7591	0	0	21.6444	11.7855	0	15.0044	0	22.8247	0	11.0805	0	21.0578	0	25.9739	21.913	33.3333	16.498	8.12834	12.154	22.4471	21.2024	14.0667	0	20.6598	17.1093	0	22.7351	0	0	0
14.5441	0	0	0	0	13.4124	7.70776	0	0	0	0	0	0	20.8774	18.6221	20.7358	0	0	0	0	26.8842	0	0	0	0	13.2587	13.8956	0	0	0	20.8967	0	0	0	20.5863	0	0	8.12444	0	0	0	19.1981	12.331	0	0	0	0	0	0	34.74
0	0	12.8169	0	24.6347	19.9408	19.613	0	12.2192	21.1354	0	11.152	0	7.42042	15.9031	0	0	0	25.7903	0	21.0181	30.9377	0	2.46068	7.91451	8.24746	0	12.9061	0	0	19.8966	34.6549	0	24.9454	0	9.09424	13.2766	21.1821	0	0	17.4315	0	21.3549	0	0	0	0	8.12458	15.5424	2.81654
5.05281	53.9111	21.5474	35.9093	12.6763	4.60405	0	33.0559	0	0	16.7486	0	0	0	15.4569	10.8265	65.1961	26.8034	0	0	0	13.9553	13.4481	12.3927	0	10.9052	37.5053	16.5809	41.5945	0	0	0	21.1089	0	0	11.8698	0	0	16.6088	48.0685	0	13.3585	0	12.1613	36.2049	0	0	0	0	0
9.65631	24.9756	16.6831	0	0	0	35.5027	7.89412	15.4481	0	11.2763	26.0704	29.8115	17.283	14.1276	20.4721	0	22.6434	7.10203	0	22.2549	0	0	20.2356	38.2571	6.24515	17.6429	0	0	35.8292	20.0747	0	0	18.6908	0	9.0301	20.2281	0	15.2784	0	0	2.07039	11.2724	0	0	19.1989	0	48.5557	35.6539	0
0	0	0	0	0	21.5003	0	0	6.65239	26.5888	20.2116	0	0	33.3333	0	0	0	0	11.5794	15.74	0	0	26.0698	14.1345	0	21.5062	0	22.6501	0	0	13.664	0	0	33.3333	12.4791	0	25.0904	55.7988	6.41992	0	4.1118	12.4703	0	22.6898	10.8086	0	20.4803	0	0	3.32542
14.6941	0	12.777	33.3333	23.4055	5.90196	0	0	0	0	7.75142	24.1301	4.29678	0	8.97933	0	0	33.3333	17.987	17.2519	0	0	0	0	18.6396	0	0	0	0	0	0	35.5293	21.5669	0	0	0	0	0	0	0	8.63257	13.916	22.5882	0	0	18.7677	0	0	0	1.46457
22.0953	3.15553	0	0	0	0	21.7411	17.3059	2.58954	11.4205	0	14.3959	0	0	29.4382	14.0338	0	0	14.7567	14.3333	9.49678	17.587	0	0	0	15.8795	27.6581	40.9377	17.8371	27.0919	15.7234	0	0	0	0	21.6437	0	0	0	33.3333	0	0	0	24.1235	0	24.7896	21.9145	4.43845	11.0017	13.0361
7.94355	0	0	17.3007	0	20.4014	0	0	0	5.69891	7.4577	7.26292	33.3333	0	0	15.2579	0	0	0	0	23.6812	0	3.87422	5.45748	6.56442	0	0	0	32.5617	7.79246	19.6693	33.3333	0	33.3333	75.8283	0	0	4.69032	34.7795	0	0	29.5747	0	0	0	14.1344	6.64888	0	0	42.9989
0	5.33043	16.6502	13.4567	20.4816	0	26.2594	0	20.1342	0	0	9.20324	32.5584	16.0504	0	12.8612	15.8602	0	0	0	19.322	34.2536	29.2725	0	19.5263	0	0	10.6832	0	0	13.2587	0	21.5465	0	0	11.6896	23.4771	0	22.6182	10.5209	0	0	8.418	0	18.6469	0	0	0	0	0
18.6392	0	0	0	43.4366	0	0	16.9441	26.6809	25.461	16.5847	0	0	33.3333	8.89711	4.80838	0	10.6899	48.5749	33.6747	0	0	0	19.1988	12.9226	13.6953	10.5726	0	8.00667	0	17.6099	0	0	0	0	0	18.0992	0	0	0	58.0341	0	44.0785	0	17.8437	0	0	13.965	37.5958	0
15.7335	12.6273	0	0	0	47.5923	0	24.8	15.2957	19.0223	14.3056	18.9374	0	0	23.1009	0	0	0	0	0	11.2338	23.6272	0	0	4.08998	19.9415	6.62114	9.14808	0	8.62277	0	20.7319	17.3078	14.6425	0	24.3032	13.1052	10.8679	0	0	0	5.59485	13.643	41.0253	0	0	44.7522	11.2011	13.3641	39.175
6.18523	0	32.3423	0	0	0	16.4968	0	13.1992	11.8084	5.66401	0	0	0	0	21.7402	18.9437	6.52989	0	19	14.0113	10.577	27.3354	28.5809	0	11.8271	0	0	0	20.6637	0	10.4055	18.47	0	11.6927	21.4636	0	28.643	4.29518	8.07726	29.2215	23.0153	0	0	16.496	23.1094	6.20414	21.8397	2.38466	0
0	0	0	0	7.09026	11.2792	17.2471	0	0	0	9.07624	20.5441	0	21.2367	10.8232	0	0	10.8734	0	0	0	0	9.24232	0	0	0	25.8344	0	0	0	0	0	0	16.5746	6.07544	8.06861	15.293	0	21.682	31.9607	0	0	0	0	0	0	0	0	0	0
37.7239	4.72882	0	59.5878	9.60808	3.06455	12.9911	0	0	0	0	0	17.1497	0	0	8.35833	0	0	15.2734	6.99967	14.8034	29.1774	0	0	16.7539	13.6202	0	0	33.3149	15.805	29.6288	0	0	14.7107	14.1448	0	0	0	0	0	0	0	0	0	0	0	18.491	0	10.0474	42.5693
7.96313	29.5955	8.2635	0	5.48713	0	0	27.6354	27.3919	19.8835	11.1603	0	18.6204	8.47014	12.833	18.7553	0	15.5756	9.73674	13.4943	0	0	0	6.23306	21.7877	9.678	0	37.6977	0	9.2058	16.1761	7.86286	0	0	0	0	17.6544	0	0	0	0	0	0	14.8835	37.2474	55.731	0	38.3154	15.9017	19.3001
0	0	11.9636	0	15.8779	0	0	0	6.68591	27.7603	6.01558	0	0	6.95884	0	0	0	0	33.3333	0	0	0	18.0268	0	19.3389	0	30.1246	0	0	0	0	0	33.3333	0	5.09149	5.84498	0	35.2156	13.0884	32.7033	64.2688	22.1868	26.0625	18.9353	0	0	0	0	0	0
0	16.7407	0	0	34.2999	63.6021	36.4285	0	26.3212	19.9758	0	18.3025	0	13.6054	0	0	0	33.3333	0	17.6164	51.8632	44.9991	33.3333	13.4274	16.5794	21.3573	0	0	20.9452	17.5283	37.0379	33.3333	33.3333	50.0921	20.8923	0	0	25.8325	0	0	0	33.3333	0	26.2222	19.8491	0	27.7736	0	23.2859	10.0484
50.0134	0	58.4032	16.688	0	22.0542	33.3333	4.90667	13.7446	0	52.0764	27.82	16.1837	22.2912	64.8933	50.3233	100	40.2177	33.0534	46.1278	0	15.7357	39.3975	33.3333	0	43.3685	10.5452	52.0227	28.7	57.4609	0	47.1712	29.7215	18.6226	0	33.3333	0	0	0	13.2261	26.2253	33.3333	40.6558	0	22.9346	8.65604	30.4695	19.6899	0	0
0	16.9096	0	23.7243	0	0	0	44.5513	0	5.57299	0	33.3333	48.0463	0	0	14.578	0	0	0	0	12.7067	0	0	33.3333	13.9944	0	10.287	10.2797	0	0	17.1573	0	0	0	24.3731	0	51.3736	0	22.7031	0	0	0	0	0	0	10.0694	0	33.3333	14.8473	0
4.29958	32.0255	21.3698	0	19.7893	0	0	22.9067	12.9535	26.8073	0	0	0	0	11.4505	0	0	0	0	0	0	0	0	0	0	11.9761	0	0	0	0	0	0	0	0	14.0971	33.3333	0	31.451	22.2816	3.04979	0	0	7.27087	0	0	20.2035	0	0	0	14.0332
0	0	0	0	0	0	0	0	12.9028	0	21.6714	0	0	11.2578	0	0	0	0	0	8.71729	0	10.0877	0	13.6729	0	0	17.6318	0	3.57914	0	0	11.6326	0	0	6.36561	0	15.6789	7.50084	20.2449	19.0602	9.50589	11.1465	26.0108	7.11111	9.57021	5.34004	20.4021	8.66142	17.4316	14.049
0	0	0	0	7.84734	0	0	0	0	0	0	0	0	16.1799	0	7.98507	0	0	8.6031	7.04455	20.6267	0	0	0	11.5456	0	5.57705	0	13.4607	0	0	0	3.61188	0	8.96019	19.4197	0	0	0	0	0	0	0	32.8478	10.3987	0	2.86385	0	18.486	0
0	0	24.5157	16.4245	18.7814	12.9123	0	0	4.8415	12.9711	16.1557	17.6065	0	0	30.8429	18.8459	0	25.2186	21.0211	0	22.4032	0	0	16.2881	10.0122	13.3853	0	3.02121	0	24.8514	36.2492	7.83512	0	7.16588	16.815	18.4358	0	0	11.6148	0	16.5497	0	0	0	28.0547	22.4512	0	0	0	15.1763
33.0382	48.537	13.3905	0	0	38.9639	0	11.6588	13.5217	0	0	15.4093	14.0878	0	0	35.5835	0	19.2774	0	0	0	8.84799	0	0	8.09599	20.2464	9.7245	18.3756	0	30.9491	24.6401	19.1677	0	12.1515	6.97244	0	2.81442	9.20127	0	0	32.469	32.8251	18.6224	0	0	0	15.4721	0	0	0
21.3267	0	23.2694	42.3653	9.56715	0	36.5718	18.1789	34.7235	15.7585	0	16.9408	31.6487	23.1232	0	0	62.9918	0	0	6.68584	0	0	14.6782	24.8992	13.0264	30.0958	6.36185	22.1688	0	0	0	13.3841	14.0913	0	13.2484	30.5604	0	41.0538	0	32.7359	0	0	0	24.9931	0	33.3333	33.3333	34.3131	21.9069	0
0	0	8.81764	11.8214	17.1492	0	19.3596	0	0	0	18.2894	0	0	14.7084	18.0436	0	0	17.3819	0	0	12.9992	0	43.1842	0	9.86099	0	0	0	0	0	13.6578	0	16.747	0	0	0	11.1823	0	0	0	0	13.8514	20.7607	0	3.02219	17.8096	0	15.0073	0	15.8351
9.56195	8.93649	0	0	14.8013	0	0	27.2735	0	26.6699	27.3025	20.6727	0	0	0	0	0	0	11.6552	23.6971	0	47.8046	0	0	0	0	5.58836	0	9.24593	0	8.98342	0	0	32.4137	1.74085	33.3333	25.1126	0	18.5661	0	0	0	26.3509	33.3333	33.3333	0	5.71895	0	0	2.11814
0	0	0	7.1675	0	0	11.5198	0	12.2796	0	0	0	34.3608	38.0426	8.24124	0	0	29.342	35.5422	33.3333	0	0	0	12.115	5.24034	0	0	23.9392	50.908	26.0202	8.69328	0	27.4299	8.08463	8.17996	0	14.0941	14.1066	33.3333	11.9552	0	15.259	0	0	0	0	0	0	57.4291	3.94846
5.8591	0	9.09741	5.08742	23.7662	0	0	22.5888	0	32.9589	0	0	0	18.6249	10.4069	20.5989	0	0	0	0	13.4415	7.34024	0	18.0518	0	8.78367	7.20362	0	0	8.48194	0	0	0	0	20.085	17.6704	22.151	20.1856	0	20.9315	29.2408	0	0	0	0	0	17.8612	0	11.4265	0
12.9224	12.5897	10.0639	9.19496	9.23008	20.421	13.9737	0	19.8116	0	32.2215	0	0	0	27.3879	0	0	0	0	26.6475	16.1083	22.5403	13.0308	0	0	0	33.3333	22.8019	0	0	4.22093	19.9492	19.242	29.2113	14.7774	0	8.22072	0	21.7186	21.3781	0	0	27.2836	41.6736	35.5898	13.788	0	16.7372	0	17.4982
6.14752	15.8283	0	7.93891	6.70465	14.9515	18.575	0	14.822	11.6416	0	22.1238	0	0	0	0	37.0082	4.6492	0	0	35.0479	13.4669	18.6551	28.6459	53.7641	16.3245	21.3831	9.69329	24.0874	9.69742	3.55533	39.6639	22.4898	10.973	0	0	16.4248	0	14.7672	0	0	21.5322	6.98246	0	0	12.6178	0	33.9424	0	16.639
11.1441	14.1084	10.8454	0	0	12.7513	0	20.2999	0	0	6.03083	7.24689	19.9027	5.50087	5.07742	24.9716	0	4.1309	31.7814	9.63623	0	0	10.4517	0	0	11.1644	16.4052	0	15.7586	0	0	0	0	0	18.1809	0	0	15.4527	0	12.9993	21.7406	16.5323	0	0	0	0	27.6144	0	9.23754	28.7848
0	11.9792	16.1975	0	7.82279	0	0	0	11.242	3.27491	22.9914	0	0	12.4848	12.5827	0	0	0	15.4849	0	0	0	7.74834	0	0	0	0	18.3765	0	7.34588	4.41324	12.0582	11.8017	0	13.1042	26.7118	4.68175	8.43689	0	14.7245	0	0	19.2067	0	11.9265	19.727	24.3546	0	30.1221	0
0	0	0	0	0	0	0	0	3.94133	4.10023	0	0	0	0	0	0	0	2.07582	0	0	0	0	0	6.71459	9.00794	0	0	5.14418	10.7588	0	0	24.7843	5.48012	19.5015	16.1341	15.9286	6.33745	0	0	0	23.2159	11.9226	0	22.3892	15.0823	14.541	0	3.3241	0	0
0	0	0	20.3145	31.2531	0	4.26534	14.0488	0	16.4775	0	0	0	0	0	0	100	0	0	0	21.3508	0	0	13.706	16.8342	6.38701	0	0	0	0	13.7716	0	0	0	0	0	0	0.95476	14.5526	0	0	5.93237	10.6849	0	11.8355	0	0	18.2586	16.7022	17.3906
33.7676	0	9.09091	11.6515	0	54.7421	22.4519	28.7253	11.3832	19.8886	20.8514	44.6424	18.8676	23.1521	33.3333	13.3663	0	26.548	0	16.107	21.463	21.1637	34.3559	26.0925	0	24.6244	0	0	0	12.7657	20.1787	23.0644	0	14.7425	0	0	0	0	9.19858	0	0	33.3333	16.4704	0	0	0	24.1502	9.41828	0	24.8107
0	28.4705	25.1823	0	12.8859	21.3256	38.7832	0	27.8343	0	34.5989	23.168	58.7099	30.4756	45.5242	33.3333	0	45.6002	44.0677	52.6064	0	9.13888	21.4488	5.26684	0	6.5945	16.2167	26.1839	53.1114	33.9609	17.4751	0	53.7529	14.9755	39.069	10.3647	17.0149	0	13.884	69.5222	0	0	0	29.7682	0	6.38485	33.3333	24.948	0	0
24.9361	0	0	7.18212	15.9738	0	0	0	0	0	0	0	0	0	0	23.0353	0	0	8.14487	0	0	9.98203	0	0	24.3254	0	18.095	14.9568	0	0	0	0	0	0	8.47953	14.7469	26.9959	17.1887	0	0	57.9634	17.1014	0	0	14.7722	0	0	0	14.5383	4.20545
0	0	0	21.6818	8.44967	0	0	35.9512	16.5364	30.0584	0	0	14.4658	13.1159	0	0	0	0	0	0	29.7518	0	9.33654	7.9976	33.3333	6.56098	33.3333	8.57723	0	0	13.1547	18.6726	0	9.28593	0	7.96428	28.6516	36.9975	0	0	0	21.4107	0	19.93	21.4978	33.3333	0	15.0747	0	0
0	59.5503	0	27.3708	0	0	19.9192	0	0	16.8559	12.4819	8.36371	0	17.9138	0	19.9671	0	6.78535	0	10.9757	3.89923	24.1945	22.5128	7.2408	16.4991	0	17.1166	0	9.14581	0	19.5617	12.8715	0	18.5908	0	14.8433	0	0	0	12.758	18.8207	0	36.775	14.9506	18.251	18.7923	8.97872	20.591	16.6312	17.3919
19.156	0	31.4888	0	12.6246	12.0078	10.8814	0	10.7081	9.34447	9.07636	10.1654	7.95678	2.85772	0	10.298	0	0	20.9181	3.08453	15.4519	12.1696	4.59754	0	0	41.6967	0	15.4448	0	33.6043	0	8.549	19.4606	0	4.51317	0	0	0	62.3648	2.99523	0	0	0	12.962	6.63469	7.22149	0	8.38535	22.0063	11.7373
22.1403	0	18.0405	11.7992	10.9901	11.9246	3.69893	21.2747	18.3546	0	0	13.6606	0	0	8.55976	0	0	18.9906	11.3845	17.2263	8.0833	23.3513	0	32.9816	0	14.1364	15.2383	11.3166	26.9839	12.3232	11.445	0	9.50459	22.9038	18.7	9.4405	16.3185	36.4222	0	0	0	10.2995	16.8629	0	0	0	9.18316	0	0	24.4641
0	0	0	0	9.84067	0	0	0	0	0	0	0	11.5313	9.82183	12.0352	14.308	0	11.2416	0	0	0	16.5034	15.4117	13.8893	18.1425	0	0	4.0257	0	0	0	26.342	0	0	0	0	0	0	0	17.9328	8.96119	0	11.7656	4.98121	0	4.4102	0	8.67775	12.734	1.67269
0	0	0	0	0	0	8.50822	0	0	0	14.1805	17.8275	14.8493	0	0	0	29.6258	0	5.23071	0	0	0	7.88626	0	32.4425	0	0	0	0	0	0	8.73385	0	14.0663	0	4.83575	5.3671	0	0	0	0	50.2815	0	0	5.08076	11.8453	26.6245	0	33.3333	14.8607
52.8256	0	11.4374	20.5778	0	5.26822	6.1509	0	12.0702	0	23.0776	16.4206	0	7.62008	11.3716	0	0	16.9816	0	14.9734	0	0	0	0	0	0	10.1613	16.8396	10.3959	13.9624	19.3025	0	18.3233	24.0986	0	7.52646	0	0	11.6188	14.7073	19.4892	0	0	14.8783	0	17.6793	12.6603	14.1759	0	0
12.3578	77.8752	11.8181	0	0	22.6992	4.44155	11.416	0	5.41052	0	13.2449	17.5794	0	0	26.4053	0	22.965	0	8.63191	11.0894	16.8299	0	0	0	31.3741	0	40.0663	20.9822	29.5283	36.9903	0	0	9.69565	33.3333	23.5445	18.6511	10.805	18.2299	0	0	0	17.1744	0	36.4926	8.41035	0	0	5.89046	18.2037
0	0	0	25.064	0	0	0	0	0	9.02754	0	0	18.484	0	19.6008	0	0	0	0	0	33.3333	24.4542	21.2934	26.4243	0	0	0	0	0	0	0	18.7023	9.10401	0	33.3333	1.03385	14.5883	0	0	0	0	0	21.1275	14.278	0	0	31.5995	24.6556	0	0
0	16.8339	33.3333	0	56.826	42.7905	27.1824	32.8838	54.5965	27.9228	33.3333	6.45227	0	25.7133	21.2981	44.0676	0	0	61.436	59.5796	0	33.3333	0	19.444	6.28716	33.3333	62.7014	16.4937	0	6.04027	14.0308	14.8383	33.3333	19.2671	26.131	0	33.3333	22.5283	0	0	21.8043	25.8947	0	33.3333	20.4552	0	0	41.7769	0	0
0	0	43.4111	46.0889	33.3333	0	53.7169	0	33.3333	57.6391	29.4086	0	37.556	56.8448	21.9617	0	70.3742	38.4435	0	0	55.5773	0	13.4881	0	0	10.9589	0	0	26.3026	0	8.52018	24.5995	0	0	0	9.78887	0	66.6667	21.7145	51.9593	24.3721	13.9262	21.5677	0	0	17.2689	5.7923	0	25.3407	51.806
13.841	5.29087	0	0	0	29.2421	0	38.584	0	0	0	38.2645	0	0	13.7325	15.2191	0	10.3683	33.3333	0	0	0	0	33.3333	43.1279	0	17.0187	0	0	0	11.451	0	24.2293	0	0	53.2706	10.6332	0	29.9974	15.4005	18.0479	0	16.159	0	0	15.6541	6.70887	0	0	0
20.9756	0	0	8.26929	0	0	0	17.1162	0	0	0	0	0	0	0	0	0	0	0	0	0	8.87909	0	6.90904	0	13.8523	10.1186	0	0	50.469	0	0	15.0101	32.8724	0	0	0	0	18.4394	0	7.32527	9.89749	0	18.455	12.9004	0	0	0	0	13.4569
0	0	0	0	0	0	0	0	0	0	0	7.79012	0	0	0	0	0	0	0	16.8152	0	0	41.9204	0	0	10.4813	0	22.5746	42.3192	0	9.70519	6.78406	0	0	7.20238	0	17.427	0	0	0	0	0	12.2058	14.0741	25.071	24.7319	16.6146	10.7139	22.7016	0
0	22.3549	0	0	36.4973	14.9973	7.09527	0	3.58078	14.0934	0.895221	0	33.6246	34.7242	26.7355	0	0	8.63998	15.8508	19.3347	0	5.91863	0	0	0	0	0	0	0	0	0	9.30465	7.56372	16.7514	0	17.4185	0	0	19.2683	15.3814	0	0	0	0	0	0	0	0	19.213	18.9783
0	0	12.3926	0	14.8757	0	0	0	17.2616	20.9093	11.9064	22.7422	0	0	9.56481	16.9707	24.9312	0	7.33972	0	10.5819	0	0	13.749	0	6.98332	2.02562	5.0548	0	15.5236	0	0	0	0	45.0107	19.6863	0	0	15.6975	20.6336	9.1378	36.3301	13.8844	33.3333	21.6333	7.70907	17.4126	40.9921	0	11.559
11.466	0	7.45396	14.4089	0	0	26.9272	0	0	0	8.05279	0	0	0	0	6.52966	0	9.61055	0	0	25.6989	15.1003	0	0	37.9873	0	12.2127	29.1842	36.0654	15.2593	19.2632	19.0903	7.54939	21.9375	0	0	26.8823	24.7918	9.7455	33.3333	18.4922	5.52396	8.25815	0	0	11.589	15.6961	0	0	0
0	12.6749	0	32.1477	8.59861	0	0	62.2708	7.16691	0	4.5481	0	0	0	0	5.51366	0	7.46718	6.79141	15.593	0	17.2001	31.5939	0	0	0	0	20.8027	0	0	6.43509	0	18.7052	0	0	33.3333	29.4437	22.1002	17.6358	0	0	0	12.8644	0	0	0	0	17.9172	17.411	0
38.8163	0	0	0	0	20.2637	0	0	0	0	0	0	0	3.17923	0	0	0	22.9771	10.0812	20.1622	12.0893	0	0	22.374	0	42.529	30.2894	28.2785	0	0	0	8.08688	15.2333	14.4928	0	0	0	23.2227	0	3.37124	0	8.57451	0	45.0478	21.6939	0	0	0	0	38.336
21.8673	30.2606	57.5239	12.9937	3.82999	27.0537	25.5994	0	0	52.6258	15.7111	41.7498	37.6805	25.7521	24.3201	12.9556	50.2295	0	9.5253	0	4.05827	0	0	19.3675	23.952	0	9.62888	4.14911	10.6445	29.6242	24.4186	0	0	12.5927	0	3.1634	0	0	0	0	51.5842	27.8094	0	0	0	0	0	0	0	0
0	0	0	0	5.33999	0	0	0	26.5367	0	12.758	0	0	0	5.07723	5.14138	0	0	0	0	0	21.0377	15.6782	0	0	0	0	0	0	0	0	13.6852	0	5.18442	26.6284	15.9149	0	8.54153	14.065	0	0	0	19.4489	21.6188	21.9482	33.3333	0	4.14186	27.4659	0
0	10.238	0	0	0	0	0	0	0	0	0	0	0	0	0	0	0	0	0	0	0	0	0	17.9487	18.4152	0	0	0	24.8428	0	0	0	14.6281	18.8406	0	0	25.1882	10.1107	23.5878	17.952	0	21.7621	0	0	11.6394	25.6243	49.254	0	0	8.81376
27.8504	11.9954	17.0026	12.6886	22.1902	24.6157	13.8534	37.7292	25.4092	0	30.1011	26.0796	28.6948	25.9501	0	0	0	17.2262	50.4115	23.3037	26.3277	22.5102	8.28484	12.5949	0	17.5827	34.3516	12.5307	28.4473	22.4	26.8982	24.2436	10.5363	10.2007	28.3609	10.4837	18.4859	0	0	9.32846	2.7266	0	20.4689	0	0	21.7444	17.6373	0	23.6849	0
0	12.4763	5.62694	27.7611	8.6681	13.0696	26.5247	0	20.0448	12.3715	16.0272	9.42831	0	10.3944	34.3024	52.8889	24.8394	34.0791	0	21.6064	21.244	18.233	11.1097	13.9658	19.6454	32.905	11.4918	0	0	17.1929	22.9848	25.5894	25.7839	0	0	0	0	11.2332	0	0	18.0592	0	25.0752	0	23.0852	0	0	36.9489	12.2252	22.3129
0	0	0	0	0	0	0	0	0	0	0	0	19.7038	0	0	0	0	0	0	0	0	0	7.82214	0	15.4097	0	0	18.0796	0	0	0	0	0	0	0	12.1108	8.29578	0	12.2956	0	4.9217	8.85452	2.59455	0	0	0	0	0	0	17.4128
15.6912	32.4666	31.6078	0	32.627	25.2359	40.699	46.7065	15.5456	71.6158	42.6816	48.9069	0	26.8865	0	0	0	0	43.5281	14.8524	17.8447	0	11.0784	21.3192	0	12.3018	12.6128	34.9522	23.7709	9.6278	24.5294	17.4784	0	0	17.1023	12.8263	0	0	30.4014	42.6938	0	3.80286	0	27.3641	5.77689	12.1212	0	0	4.13016	18.3379
21.1689	33.3333	0	9.65192	15.1536	56.617	17.091	36.9307	38.0307	0	0	13.3017	26.4385	42.2665	17.4911	37.1852	22.7011	20.7248	19.7621	14.5497	14.6295	28.4554	9.35975	21.942	10.5746	0	0	0	18.0183	9.98684	25.7952	0	11.4897	32.8567	0	12.2153	14.307	14.7143	0	9.96815	9.53866	13.2946	64.0721	0	19.5086	21.885	35.8852	0	24.2921	0
0	0	9.594	8.13817	0	0	0	0	0	0	24.4683	0	0	0	21.041	0	0	14.3661	0	33.3333	0	0	4.08953	0	14.7402	0	0	0	0	0	0	29.6946	0	7.12067	0	0	29.6975	0	0	0	0	8.96907	19.1029	15.9592	23.5686	0	0	6.15486	11.7954	19.3435
0	0	0	0	0	0	0	0	5.79034	0	0	0	0	0	0	0	0	0	0	0	0	0	0	20.7299	0	0	0	0	0	7.73957	28.3373	0	0	0	0	11.5824	0	33.3333	8.13404	0	5.57563	0	0	9.06823	0	0	0	0	29.2032	0
0	0	0	0	0	0	0	0	0	11.4752	0	3.63626	20.4548	0	16.4221	0	0	0	0	4.78762	0	33.3333	0	0	0	0	0	11.4971	23.3333	0	0	0	0	0	53.8906	0	19.0263	0	0	4.47651	33.3333	19.3955	0	0	0	32.6604	0	0	0	14.9954
8.0969	7.60991	9.35794	0	17.5306	0	0	0	0	0	19.448	0	0	6.44684	12.2924	0	24.0517	12.6085	9.62989	0	0	4.8779	14.7385	12.0142	24.9513	0	42.7501	7.99731	17.4455	0	7.53814	37.0575	21.7207	0	0	17.1269	0	0	3.25513	23.3652	0	6.83849	0	0	0	33.3333	0	86.8961	0	4.30493
38.2272	0	38.7349	82.2099	34.6888	8.09746	0	3.29345	5.8488	8.50186	8.86506	20.0316	0	24.4002	32.7534	14.3236	0	52.3006	13.5713	13.6933	67.5258	0	21.4217	12.6035	12.1858	87.6982	33.3333	10.1456	0	72.6458	0	15.7695	21.8436	0	16.231	9.6401	0	0	0	0	23.7947	0	14.2305	16.0708	27.5564	0	0	0	9.04119	13.9463
0	14.3496	0	0	0	0	0	13.0693	11.9974	8.40712	0	14.1235	15.3334	0	0	0	0	0	8.42111	0	0	0	23.9736	11.3913	0	0	0	10.1452	0	0	0	0	44.946	60.0227	12.7761	21.118	14.3382	33.3333	12.9037	19.4963	22.836	0	0	17.3741	23.5894	0	23.0778	6.94904	21.538	0
16.8158	12.2406	10.7053	0	0	10.0497	42.21	0	22.7872	0	4.5371	0	18.0695	0	0	48.4912	53.2471	0	5.0876	18.7837	0	0	7.51639	0	22.1384	0	11.3037	7.18295	17.432	0	13.8	0	0	0	0	3.38011	14.3352	18.619	33.0102	0	0	38.8449	0	14.1635	0	0	41.037	0	0	11.6592
0	0	14.0456	8.52648	0	0	11.5474	41.6981	0	15.0235	0	15.5491	0	7.40793	7.86712	0	0	0	0	11.237	13.2944	32.5208	0	27.786	0	11.1534	16.7196	0	0	12.9006	11.281	0	0	0	0	9.98004	0	0	0	24.7444	15.5572	0	13.956	0	0	35.2817	0	0	0	14.5887
14.2363	0	0	16.3939	7.84639	0	0	0	0	20.3917	15.0661	0	26.9719	0	12.3397	3.49304	0	36.851	33.4476	12.6286	5.13637	9.11177	0	0	7.50844	0	0	0	19.202	0	8.41457	0	15.5608	4.89885	16.4759	0	0	29.9766	0	17.5123	0	0	12.0047	25.9633	0	0	0	14.1464	14.3401	0
0	13.0997	0	0	27.7706	46.6574	3.2326	0	5.79659	8.77478	37.5545	10.3171	15.8732	12.6806	20.7635	0	0	9.67712	10.0295	0	0	0	17.7432	10.0282	0	20.5013	0	5.65009	7.27483	15.2808	0	34.9596	1.16966	12.4941	4.49173	10.7595	23.8186	0	0	16.6724	3.29055	29.404	9.99501	0	51.9739	0	0	15.0144	0	49.335
14.013	5.35681	8.93861	17.1714	0	0	0	0	0	0	0	22.9384	0	19.3069	8.6215	17.1813	0	0	0	0	0	0	0	20.6763	0	0	11.6519	14.6762	14.1314	0	16.0478	0	9.49261	2.44648	0	24.4741	0	17.7102	17.8171	8.58896	0	20.4615	0	25.5266	0	12.6097	24.3646	0	0	0
0	21.7016	33.9349	10.588	0	0	0	0	38.4894	0	0	17.7843	0	14.0361	0	9.13888	0	0	0	0	0	0	0	0	24.7292	42.2608	0	0	15.7426	0	0	0	0	0	46.8954	0	17.1407	0	33.3333	0	23.7676	27.1474	0	0	28.6753	0	20.3506	17.7124	63.9212	0
13.5031	7.28095	0	14.4586	24.8846	0	12.153	0	20.5526	5.78061	0	10.0214	9.66458	0	0	0	100	6.19142	0	11.7699	28.3302	5.84048	26.9479	6.36522	40.2184	0	13.1448	11.402	8.80192	20.4153	6.12795	21.0661	0	16.6553	0	12.0849	5.23207	0	0	8.73477	3.12719	0	17.8632	7.37003	5.80862	0	0	19.1869	0	0
33.3333	0	0	0	0	15.0528	15.0588	27.0913	0	0	23.5392	0	0	7.50077	8.37316	15.6625	0	0	17.9127	0	0	22.1734	33.3333	0	0	0	30.8816	27.6832	0	3.55124	16.3587	0	0	6.78839	0	18.9873	0	18.1874	15.5162	15.821	17.7761	0	0	17.0173	8.88415	18.0175	27.2727	0	10.199	28.458
10.1691	27.9765	10.1573	0	25.4869	16.0179	18.5534	31.2106	28.1772	18.3099	0	0	0	14.0264	0	16.152	0	6.30363	23.3038	54.0381	20.039	6.13194	15.5901	13.1316	8.60411	0	0	0	0	20.4328	0	11.6078	57.3917	0	16.8574	0	33.3333	0	0	0	0	12.8718	42.7157	0	0	22.0664	12.9827	18.319	3.73111	0
0	11.6317	32.9236	16.1619	14.0115	16.4559	18.2746	0	0	12.9416	0	0	23.6687	25.0413	33.5634	0	0	23.6562	0	10.3265	12.9564	0	0	9.35567	0	26.0844	0	40.5885	34.8474	0	33.2099	0	16.3852	14.0508	15.2795	8.85924	0	18.5027	0	0	9.56573	10.1153	3.46541	7.80678	4.658	12.0246	15.0293	0	7.8086	0
14.7451	12.9527	0	16.6996	0	5.81599	21.1803	0	6.98413	18.7779	23.8402	23.3899	23.8216	0	8.47156	38.3722	0	17.3206	15.3064	0	20.2437	24.2216	6.38539	12.657	18.9398	0	27.602	0	0	27.4193	8.56011	32.3664	0	42.666	0	14.8549	20.4753	15.6232	33.3333	7.9262	26.9156	0	0	16.316	0	0	0	15.621	0	7.61831
7.65069	0	6.23342	0	0	9.13176	0	0	7.39686	3.97248	14.7321	0	0	0	0	8.55019	20.4592	7.48277	0	5.55841	0	5.21894	0	0	9.59492	5.86624	0	0	9.26398	7.44577	0	5.17768	0	0	0	0	0	0	16.505	0	16.395	12.8718	0	0	0	0	0	15.8235	14.7917	2.20096
0	0	0	3.46719	7.31514	0	0	0	0	0	0	0	0	0	6.74593	0	0	0	6.86302	0	5.99104	0	31.4574	0	0	8.87521	17.4334	4.95064	0	0	0	0	10.546	0	0	0	8.15433	0	0	11.9474	0	0	10.1649	0	48.2412	32.244	0	7.04868	12.0245	0
12.1983	0	0	12.3063	0	4.40559	12.2606	0	0	0	0	0	0	0	0	0	0	0	6.11357	3.61439	0	6.60042	0	0	0	0	0	6.24576	0	0	0	14.548	0	4.9227	16.7243	0	0	0	11.5854	11.6409	0	18.0838	0	27.4336	1.97828	0	12.0022	0	0	0
0	10.3541	6.23711	9.07229	8.2403	13.2998	0	0	17.0052	0	0	0	0	18.4067	5.35133	0	21.7676	0	6.86925	0	0	0	0	0	14.5188	5.06476	0	0	6.50879	10.7889	0	24.5357	0	11.4597	0	0	0	29.7673	2.52548	0	13.0428	0	0	12.0246	0	9.36359	7.37381	12.7985	0	80.4367
0	5.57673	12.3002	0	5.51488	11.17	7.61402	8.20681	9.55367	4.65222	6.37751	21.4538	6.51669	6.06198	6.95701	9.14916	0	14.9164	8.04875	12.0713	7.66923	0	0	5.22191	12.44	4.61171	0	0	17.2997	7.39185	28.7983	0	0	0	31.2369	33.1281	22.4106	11.0252	0	33.3333	16.2471	22.2942	2.18107	25.1014	10.531	46.5721	12.2897	8.87454	33.3333	0
0	0	0	0	0	0	0	0	0	0	0	0	0	0	0	0	0	0	0	0	0	0	0	0	0	0	0	0	0	0	0	0	0	0	9.86395	0	8.46454	0	16.8283	0	0	20.4616	33.3333	0	0	0	0	0	0	0
25.6826	22.9792	0	0	10.5048	0	10.4417	0	25.0123	7.83256	18.6757	33.3333	33.3333	0	57.2569	0	0	33.3333	0	33.3333	33.3333	0	34.0053	33.3333	18.8146	0	13.9327	0	5.46619	0	0	0	44.8881	0	0	0	0	14.3678	10.5745	10.1553	0	15.2495	0	5.89971	14.684	0	0	14.7032	18.5417	0
54.4684	61.0899	0	75.1543	51.6767	61.9929	9.15554	0	41.032	0	60.2147	26.7813	33.3333	0	0	82.3007	0	44.2675	45.6351	21.262	53.0064	21.514	0	61.4448	34.0685	75.5821	49.2332	0	40.103	74.3735	21.9491	55.7387	0	0	0	0	0	0	0	0	54.3151	11.0391	31.1523	21.3088	3.7415	11.8203	0	0	21.3088	2.01941
0	0	0	0	0	0	0	0	0	0	0	0	0	21.8299	0	0	57.7732	0	0	24.1605	0	33.3333	0	0	0	0	0	0	0	0	0	0	22.7874	33.3333	18.7055	0	0	22.5316	21.748	21.6924	0	0	0	0	0	0	68.3342	8.63533	0	15.3429
0	0	75.2293	0	16.7482	0	60.5282	91.7932	0	83.5427	0	18.4315	26.8166	53.7014	23.6888	0	0	0	26.4703	0	0	33.3333	34.5373	0	10.5633	0	19.4006	88.8036	21.3584	0	49.2526	0	21.7785	50.2843	23.4694	33.5386	60.9706	22.3081	20.2333	11.2306	0	0	23.1685	8.23188	20.824	0	0	32.1163	0	0
0	31.5752	0	0	0	22.0135	0	0	12.6282	0	16.6294	11.2548	0	0	0	0	0	0	0	19.1179	0	0	11.7407	0	8.03822	26.8952	0	0	9.4377	6.75991	0	25.4813	0	0	0	23.6828	0	0	15.3225	0	10.9152	0	30.4918	28.5461	15.5216	29.7056	0	0	31.7992	4.11188
25.0938	0	0	0	5.92144	32.2539	0	0	0	0	0	13.5118	0	33.4551	0	7.40386	0	0	32.9752	0	0	0	6.95244	0	0	0	9.29862	0	0	0	0	0	0	7.39159	0	11.9478	0	0	0	26.0193	23.5496	15.3794	0	0	0	0	0	0	0	26.9717
0	5.13569	0	0	0	0	0	0	28.4243	27.986	17.654	0	0	0	14.9209	17.6265	32.9615	14.5114	0	18.0958	20.6697	20.3954	0	0	16.94	0	0	8.90639	0	0	8.34114	6.4629	0	0	21.8882	0	37.8575	0	0	0	0	18.2613	0	0	3.61001	0	0	0	13.484	0
21.1576	0	9.32577	0	0	0	31.0086	0	9.2331	0	0	0	29.8983	0	22.814	0	0	16.5487	0	0	20.4397	38.0226	4.66518	60.8434	0	0	15.2117	23.0928	24.6734	8.7202	8.59579	25.8609	17.6833	0	18.9877	0	0	5.42673	0	33.3333	0	26.8994	33.3333	0	0	19.9885	0	0	0	0
0	0	0	50.863	13.1308	12.7791	0	0	0	0	0	19.8216	17.7401	0	0	26.4617	0	0	0	22.2377	10.5093	0	0	0	15.8096	0	0	0	0	22.2817	33.3333	13.2225	5.26406	9.48632	0	23.8597	0	33.3333	0	0	0	0	0	0	11.6732	19.5076	21.3502	0	0	0
0	13.0894	0	0	24.458	0	16.744	0	0	0	16.704	17.6831	0	33.3333	9.16249	15.1215	30.5075	0	19.6429	7.40651	0	0	47.9735	0	9.34233	31.3478	45.834	23.2787	0	22.1634	41.6875	0	33.3333	22.4165	33.3333	0	33.3333	24.7322	27.2146	33.3333	10.8872	0	0	0	0	0	15.3327	33.3333	5.50037	54.4574
12.8039	0	0	0	21.9329	9.2852	0	0	15.4604	0	49.0127	10.9999	0	0	33.3333	0	0	30.9918	43.0585	9.07244	22.824	14.8992	0	14.4213	0	33.3333	0	26.5538	33.3333	0	0	21.5	27.3156	0	11.4451	0	5.51107	0	33.3333	0	0	33.026	36.1749	43.2948	33.3333	0	0	18.5489	14.9538	14.4591
8.23956	20.2143	57.3409	0	0	8.15391	0	71.3225	28.7933	66.6667	0	0	15.5933	0	9.24998	15.7069	24.1309	16.7846	0	11.0956	12.8936	12.9379	0	0	17.5237	0	0	0	6.38078	7.78172	0	0	0	33.3333	0	19.1241	9.57889	0	0	7.314	33.0152	0	0	17.3745	24.3478	30.7983	0	33.3333	29.3671	0
0	0	33.3333	38.4802	8.87536	11.3198	52.2474	0	0	5.34735	0	0	20.9406	33.2116	0	0	0	0	0	0	12.6636	7.53105	28.6682	0	0	8.42366	18.1216	10.0546	22.0458	22.6698	0	7.47245	0	0	0	21.3856	0	14.2351	6.11872	0	0	0	0	0	11.514	0	33.3333	0	0	0
32.7051	29.9855	0	10.6568	25.6816	4.19454	0	28.6775	5.46076	0	0	26.7288	15.8278	0	10.5193	17.6796	12.4001	21.1635	4.32347	12.974	0	6.21376	0	24.7353	32.3461	0	11.534	8.1137	4.12899	9.62323	8.04225	0	16.4037	27.3722	14.3456	0	13.7192	22.2726	18.0108	0	21.6328	6.43393	0	10.7846	0	0	29.9838	14.7845	4.89553	0
12.2704	0	0	0	0	10.8379	0	0	0	0	0	0	0	9.80254	11.477	0	0	0	0	0	0	13.2354	0	9.84952	12.6816	0	0	0	0	0	13.7042	27.0997	0	0	6.36571	15.7625	16.5457	0	0	27.2461	0	23.4858	0	0	11.8691	20.2353	0	0	9.82253	0
14.493	0	5.88625	0	6.43691	0	0	0	0	8.24625	36.9347	0	18.4698	1.82971	24.8916	12.8633	0	0	30.3392	0	8.57083	13.2514	0	13.69	0	4.90899	0	6.48131	0	0	15.9301	0	0	9.78035	7.03218	0	0	0	18.373	0	0	3.78615	12.5081	32.2791	1.54805	6.24406	0	0	0	0
0	7.12657	0	8.19489	0	25.3936	31.0013	0	8.7689	11.4333	19.2809	0	4.49911	0	0	15.4183	0	4.33347	3.65174	21.577	19.2818	10.3125	18.8153	0	0	11.5622	0	6.68444	27.864	22.771	0	0	0	0	0	0	0	0	0	30.4204	33.3333	0	0	0	0	0	16.5733	34.6642	0	14.8796
0	15.1364	3.46198	7.00067	13.4376	8.37113	0	20.5767	21.801	12.9563	0	0	0	0	6.31684	4.88494	0	4.22384	16.8316	4.55667	6.34902	0	19.9608	0	20.1521	6.53714	27.1388	0	0	0	24.0377	0	44.5894	0	10.4241	34.4089	14.1574	41.4066	16.2379	33.3333	0	21.7764	0	0	0	0	27.5428	15.3057	12.7933	21.4673
25.6625	0	16.7422	0	5.69741	0	0	28.9733	0	2.25655	0	52.6924	0	14.767	0	0	71.7297	0	0	0	24.7625	0	0	0	0	0	10.0877	47.0154	10.0096	0	0	4.90592	0	17.572	4.48947	0	0	0	0	0	0	29.5472	41.3174	4.74527	42.4126	28.083	0	0	0	0
18.8404	21.0672	20.2146	8.26558	0	0	44.786	0	42.4289	21.9	15.8853	0	19.0436	16.9977	10.166	14.1308	0	19.4735	0	0	0	33.589	0	0	33.3333	0	0	0	0	15.2705	8.87586	38.1255	0	14.8538	0	0	18.8849	0	2.67724	6.08726	52.443	0	0	15.2224	21.4642	27.0893	0	26.3748	28.7351	24.4201
0	0	0	0	30.9859	0	0	0	0	22.8305	0	0	33.3333	0	8.44176	38.3851	0	10.769	0	28.7767	0	0	40.9193	31.3089	9.75657	6.27621	0	0	0	0	21.1543	0	26.037	0	14.889	0	8.11346	0	16.6667	2.91298	0	0	0	14.351	0	13.098	0	0	0	39.2329
4.21323	18.1969	0	59.666	21.199	33.0299	15.5242	50.45	0	20.3771	8.25522	0	0	40.2674	21.8563	0	0	29.1095	13.4443	0	0	29.6118	20.3047	0	0	21.7711	39.5278	0	62.1264	29.0981	0	14.809	29.3736	23.553	0	49.8287	19.1759	15.064	17.0954	0	0	0	20.8252	0	14.616	5.25031	11.8287	5.62771	20.54	0
16.3317	38.4729	31.13	16.8729	22.2431	22.3675	8.68852	0	27.0012	0	19.6439	39.8092	24.6542	16.3356	16.8505	14.3176	28.2703	0	35.7332	45.0897	41.0359	0	0	34.3771	24.0764	20.52	0	26.6489	0	32.8604	16.2979	0	0	34.2409	16.5435	0	23.1226	43.5294	0	0	0	9.84757	0	28.5881	8.08998	0	16.76	18.0276	23.5108	0
8.18882	0	22.5649	0	0	0	0	0	0	0	0	7.49836	0	0	0	0	0	32.0908	0	0	0	0	0	10.7745	0	28.4243	23.2456	13.1699	0	0	0	15.0599	0	0	40.256	0	0	0	28.9498	0	14.2237	11.557	25.3493	4.81414	0	0	27.2952	0	4.59823	0
0	0	0	5.18639	0	4.76858	0	0	0	0	0	0	0	0	2.45881	0	0	0	4.42346	0	0	2.90579	1.61397	0	0	0	0	0	0	0	0	0	0	0	0	6.32131	0	10.7753	0	16.2685	7.86455	14.1588	0	0	0	4.32157	0	30.3511	0	0
0	0	0	0	6.99334	0	6.33808	1.75271	6.77573	0	6.14982	0	0	0	0	0	4.78738	0	0	0	5.81447	4.13793	0	0	21.694	0	0	0	0	0	0	4.77042	0	0	0	0	0	0	0	0	15.0446	0	0	10.647	0	0	24.9261	0	23.4908	65.7257
0	0	3.68747	5.10655	0	0	3.85073	0	0	3.39845	0	0	3.05341	0	0	0	0	0	2.34282	11.6795	1.62086	0	1.20444	0	5.46891	0	0	6.2371	0	4.04232	0	15.6285	0	0	26.4838	19.3291	5.45065	0	0	0	17.3494	6.84855	0	19.2412	12.3225	24.5892	0	0	0	0
0	0	2.74306	0	0	0	0	0	0	0	0	0	0	0	0	0	0	0	0	0	0	0	0	3.28743	0	0	0	0	0	0	0	0	0	0	0	0	10.5036	11.0571	11.3567	30.7111	0	0	11.0532	3.61395	0	10.7883	0	0	33.3333	0
0	0	0	0	33.3333	0	0	14.812	0	0	60.5169	22.8976	33.3333	5.92715	0	33.3333	16.1846	20.0388	15.6643	0	14.5721	0	14.053	19.8421	17.7168	33.3333	14.993	0	16.6464	44.2822	0	0	0	0	44.121	0	0	0	5.48501	9.90379	3.84099	24.0056	0	0	0	0	12.8587	17.3472	0	0
25.7922	43.6679	5.12121	32.5274	34.5523	65.8259	33.5862	13.0427	62.2335	24.561	22.1779	36.5419	20.3682	15.7816	54.1002	43.0951	0	66.6667	24.0692	55.6456	59.2313	4.0613	8.30988	18.7723	19.5906	53.1401	43.4143	23.9592	58.9218	29.291	17.277	41.5694	24.3758	23.2089	0	10.4709	2.93303	34.099	0	13.9446	0	0	15.1272	0	0	33.4854	14.4244	8.44768	0	9.67742
33.3333	0	8.93601	28.2268	0	0	0	0	0	0	0	0	0	0	12.3859	0	0	0	0	0	0	10.8877	12.5517	12.4403	0	0	0	7.42039	0	0	13.8258	0	16.2085	9.78248	0	26.7141	0	0	0	0	0	0	0	43.8115	33.3333	0	0	0	0	11.7005
33.3333	0	5.49954	0	0	0	0	0	0	0	0	10.4357	0	0	0	0	0	0	0	0	0	0	0	0	0	0	0	0	0	10.8251	0	0	0	0	0	20.6234	0	0	0	0	8.11942	0	0	0	33.3333	0	0	0	33.3333	12.8964
0	0	0	0	0	15.6015	23.436	0	0	0	0	0	0	0	0	12.4459	0	13.2946	0	0	0	0	0	0	0	0	0	0	0	0	0	10.2206	20.1401	23.5509	6.84949	16.5411	0	0	33.3333	8.71965	0	26.4848	47.641	0	0	0	0	12.6108	9.84252	0
7.54115	56.3321	74.0127	28.9528	25.121	13.804	32.789	70.3926	30.9908	72.0405	11.1555	30.1248	43.2451	78.2912	31.055	11.1257	79.028	0	53.5002	32.6749	18.7612	78.0073	62.267	45.6579	35.5296	13.5266	41.5928	62.3833	24.4318	11.5594	68.8972	27.8111	39.2757	43.4578	22.5457	0	81.1127	44.0686	49.825	20.4524	47.7811	28.5022	26.1787	22.6863	21.0108	26.8155	47.7907	31.2432	0	0
0	0	0	13.4579	26.2757	21.4544	0	0	20.5437	0	16.1588	28.762	0	0	15.1478	0	0	0	0	0	24.35	0	0	0	33.3333	0	26.4692	0	0	40.1699	0	0	0	0	0	33.3333	0	0	0	0	0	0	0	0	0	0	9.20899	0	0	0
11.5243	0	0	0	14.8293	0	0	0	0	0	33.3333	0	33.3333	0	18.1454	20.9134	0	31.3541	8.92591	0	10.3776	0	0	22.9574	0	25.1181	0	0	30.9698	0	0	0	0	29.4982	35.9627	0	0	24.0223	0	33.3349	14.3162	0	0	9.72321	9.61458	17.9611	0	0	9.80392	42.8998
0	0	0	11.2793	0	0	0	0	0	0	7.87978	0	0	0	0	26.1081	0	19.0335	21.4773	16.2309	0	0	20.8815	0	0	24.1482	0	0	0	0	18.5606	19.5096	16.6175	0	0	0	0	0	17.4374	18.7453	0	15.6779	0	29.6407	13.2956	0	12.9889	27.0945	24.9033	20.9255
5.08693	0	0	0	40.391	0	0	0	0	0	0	0	0	0	9.26706	12.7178	0	0	27.6556	16.8698	0	19.1983	0	0	33.3333	0	0	14.5898	16.0997	16.026	0	8.47364	0	0	0	0	0	28.3539	0	0	0	0	33.3333	0	20.6088	0	0	33.3053	0	0
25.8294	20.0556	16.4319	0	0	36.2222	33.3333	0	0	12.3607	8.36066	0	0	0	0	0	0	0	0	0	7.71671	18.4043	11.9696	0	0	0	22.3856	0	0	10.1384	13.4495	0	0	13.8128	0	33.3333	0	0	0	0	1.51265	21.909	0	0	0	33.3333	0	0	0	15.9708
0	0	50.5011	22.054	18.5041	12.2601	0	0	12.7896	9.01085	0	0	20.0414	0	37.5571	0	0	17.9978	9.91768	21.0998	0	0	0	10.1312	15.5719	23.1697	37.6923	56.7466	0	10.6831	0	46.5742	12.296	0	33.3333	0	33.3333	5.2762	15.896	0	15.4583	0	0	0	20.0378	0	0	2.74672	0	0
44.1803	18.8943	0	16.009	0	0	66.6667	100	33.3333	0	0	33.3333	33.3333	0	0	11.5062	0	8.29747	0	17.1025	33.3333	14.135	3.5287	46.8442	0	18.3789	0	0	8.60874	0	14.7727	0	0	33.3333	20.2766	0	23.057	0	11.1059	14.588	31.8207	0	0	16.5308	23.7188	33.3333	33.3333	0	31.9594	12.4078
0	33.3333	0	33.3333	0	0	0	0	33.3333	20.9726	34.2674	33.3333	0	33.3333	10.9642	5.6727	0	0	0	16.4635	8.98335	33.3333	0	0	0	0	2.50521	0	13.267	0	33.3333	0	33.3333	0	0	0	6.30491	0	33.3333	33.3318	19.0172	33.3333	33.3333	0	0	0	0	0	0	7.79609
13.3791	13.2777	16.9014	0	0	8.99014	0	0	0	24.3225	0	4.57136	0	33.3333	0	16.3346	0	23.3172	11.8561	0	15.239	0	42.2565	0	17.7615	9.1851	0	9.92002	0	17.3073	19.8839	13.8237	37.7532	0	10.4274	33.3333	0	28.0571	0	0	0	0	0	0	0	15.3723	33.3333	20.2459	33.3333	0
0	14.439	16.1655	3.86647	0	21.0732	0	0	0	33.3333	0	0	13.2919	0	8.91847	6.74726	0	0	20.1675	12.2336	0	14.929	21.3637	20.0671	0	0	10.9477	18.7435	31.0548	5.67529	0	11.6189	0	23.3557	0	0	37.3048	14.2905	22.2275	0	17.875	29.0798	0	44.1052	12.7246	0	11.1354	16.6076	0	0
0	0	0	0	3.36302	0	27.3168	29.1048	0	0	0	0	0	10.8865	3.70517	0	0	0	0	11.7466	0	7.93339	0	9.0095	10.7827	0	3.94801	9.56797	0	0	3.30568	0	0	0	13.6142	9.40775	15.1573	0	5.02513	0	0	0	9.45208	6.07165	0	0	0	0	0	0
0	0	0	0	21.1211	12.2716	0	0	0	0	13.6839	0	0	0	0	0	0	0	0	0	0	0	0	10.4675	0	0	0	0	0	0	0	13.0769	0	0	0	26.9647	0	3.8114	0	0	0	0	0	0	0	16.2137	0	0	28.9553	14.1834
0	0	0	13.3887	33.3333	11.3977	0	20.8952	0	0	13.9167	33.3333	24.1267	13.4617	0	33.3333	0	33.3333	0	0	23.9	13.6321	0	0	27.9775	13.6322	0	21.7827	24.9175	22.1394	0	17.7893	26.7985	17.0463	22.4803	0	0	10.3651	3.14188	54.1859	0	0	0	0	26.3556	0	23.2075	43.4434	0	0
34.72	78.7727	61.1825	33.7382	15.0145	20.5001	21.0561	43.0321	25.5052	69.3933	20.9272	33.3333	0	26.0912	56.8134	64.5183	90.4112	40.3123	78.4166	28.319	25.0445	40.1252	53.7821	47.1143	44.6935	17.7534	66.6667	42.7965	18.0532	0	85.8881	17.8713	34.4074	39.1383	5.08194	33.3333	15.1788	13.0113	16.8478	0	34.0296	51.4463	33.3333	27.2617	33.3333	19.4282	33.3333	0	0	30.1047
20.9222	0	26.8233	0	0	0	0	0	55.4975	0	0	15.0052	58.9105	12.0145	29.6282	0	0	0	0	21.1974	16.4628	0	20.799	22.8658	0	33.3333	14.8369	0	20.0772	35.8635	0	0	0	0	9.70192	0	0	24.7035	15.3406	0	33.3333	16.7711	35.3887	55.4067	11.1822	27.2094	33.3333	28.82	55.7418	8.18792
0	0	0	37.7508	0	25.2983	19.9761	0	0	20.9894	9.41164	0	0	19.8717	0	0	9.58884	0	0	0	0	20.6671	0	0	0	11.4281	0	0	0	0	0	20.2565	0	0	0	0	51.5093	7.12603	22.6559	0	0	0	0	0	0	0	0	11.504	0	0
18.6229	0	5.48415	0	3.16756	5.38954	12.1431	0	7.82814	0	12.4061	0	0	0	0	0	0	0	0	0	8.28886	6.94771	8.89841	0	0	8.31191	0	11.5507	0	0	0	0	21.7848	0	10.0172	30.2943	18.1545	0	0	0	29.0613	0	0	0	0	0	0	0	0	15.7233
15.4428	0	6.51002	0	0	0	0	0	0	0	19.6495	0	0	0	0	2.14837	0	8.23588	0	12.8872	16.8706	0	0	0	11.1904	0	0	8.5273	13.2562	6.59783	10.8062	4.50495	0	33.2396	29.689	0	0	0	12.9676	28.7158	0	12.4948	0	0	22.1511	37.1488	10.1259	4.51332	15.3029	0
0	7.99162	0	0	0	0	0	6.96791	0	9.61732	0	18.3281	9.20663	10.4324	0	0	0	0	0	5.01435	0	0	0	3.89268	0	0	0	0	0	0	0	0	0	0	0	0	0	16.5106	16.4855	17.0983	3.5758	2.7255	21.8259	0	6.97774	0	0	11.7193	0	10.962
10.2921	13.2357	0	15.1222	24.0004	25.1427	19.5079	0	11.1691	0	10.005	0	7.7562	7.24213	9.85323	0	0	18.1184	21.5834	20.8355	9.43329	10.6945	16.5205	6.65014	5.35583	15.5411	14.5485	5.77487	23.6959	35.3992	0	26.5011	17.0092	10.5758	9.41548	0	0	24.472	7.53559	0	0	16.5622	0	11.26	0	0	0	0	0	20.8387
11.0257	13.3549	10.5418	6.52846	0	0	0	12.2982	12.7936	15.8514	21.6866	16.75	20.0833	19.6759	17.6693	30.8295	54.5811	23.8747	20.2711	12.5429	0	33.3333	9.36449	13.0982	35.0241	0	16.5224	23.5542	0	0	46.047	0	9.51362	10.2644	13.4747	25.1466	34.8147	0	0	0	9.69359	0	8.67224	0	0	14.1313	0	0	39.0391	10.8583
0	0	25.3517	0	22.438	0	0	0	0	0	0	0	0	0	0	0	0	0	0	0	22.3523	0	0	0	0	0	0	8.97887	0	0	0	18.6866	0	28.3965	0	0	0	0	0	12.0809	0	14.3013	0	23.8672	0	0	12.9482	33.7383	20.2163	33.3333
44.5038	0	18.2166	47.2682	19.5965	26.1771	17.1837	0	0	16.0082	0	0	0	22.3784	0	0	0	0	0	0	0	0	0	7.35938	0	17.0619	0	33.3333	0	47.9704	0	0	12.7889	0	0	0	0	0	13.5062	0	24.9025	0	15.3058	11.6935	50.5285	61.4055	0	24.0222	0	0
0	29.2134	8.90199	4.54628	0	24.7134	15.0703	23.6532	38.9507	20.178	23.6349	15.8762	18.5422	25.101	23.6138	51.6441	0	24.9486	14.2459	20.2614	66.6667	16.3221	0	7.67888	33.3333	33.3333	18.2028	0	16.3969	13.1709	10.2673	8.83464	5.34759	39.1442	15.5288	27.9132	13.6489	15.584	8.23685	0	8.45713	21.8377	0	0	16.8766	0	17.5774	0	8.48173	9.41767
0	0	0	0	22.5569	0	33.3333	0	0	0	0	33.3333	0	4.52847	0	17.5264	0	19.7622	27.0934	31.5203	0	0	33.3333	0	0	21.3129	44.5774	15.1978	0	0	14.9736	14.8429	11.4423	0	19.8587	3.33799	3.66581	33.3333	16.8118	0	0	0	12.4605	17.0002	0	0	0	0	0	22.475
11.3567	23.4991	0	0	0	7.6716	7.2855	50	33.3333	0	18.6127	0	5.16159	0	0	0	45.4189	0	0	0	0	33.3333	0	22.1122	18.1034	0	0	0	0	0	0	0	0	4.93685	0	28.3389	0	14.6999	0	40.3717	7.18663	33.3333	0	0	0	0	15.7559	24.7811	9.29814	0
24.2312	0	29.0063	19.3985	1.66993	8.61997	18.263	0	0	0	0	0	0	0	14.124	0	0	0	0	0	0	0	0	38.5302	0	0	0	0	50.2698	38.8587	28.7121	14.6468	0	0	23.0824	0	12.8544	0	0	0	24.8762	0	0	0	0	19.202	24.6353	0	13.1171	0
0	15.5606	0	0	0	12.525	0	0	14.9224	26.762	36.0657	11.2469	48.1244	28.3162	18.3764	0	0	0	38.3897	10.39	10.981	0	23.9688	0	13.5391	12.0205	20.6975	0	33.3333	0	0	42.9891	21.8911	0	0	9.84319	0	0	0	33.3333	0	30.5277	12.2006	16.3331	0	0	0	0	5.06329	23.9157
8.88265	18.372	7.98162	22.2586	33.7387	20.293	8.86416	14.0486	0	21.2003	0	22.7936	8.08845	0	26.2165	0	0	31.4145	0	25.2855	0	17.0112	33.3333	11.2212	0	16.2715	0	0	0	0	0	0	39.0165	0	17.8046	5.42018	35.0162	36.3828	61.4452	14.214	24.884	0	51.3609	9.46616	32.5949	5.26114	0	17.4584	0	0
0	0	0	0	0	0	0	0	0	0	0	0	0	0	0	0	0	0	0	0	0	0	0	0	0	0	0	18.9358	0	0	0	0	0	17.2581	10.2509	0	0	0	0	0	0	0	0	21.6398	0	0	29.0832	0	4.78438	0
13.7237	0	0	0	0	0	16.4223	19.5823	0	0	13.5425	0	0	11.2424	0	38.0755	0	0	0	25.3503	19.6043	0	60.7522	0	0	0	0	17.6539	0	12.0494	0	0	0	0	25.4171	0	0	0	0	0	0	19.593	0	0	21.8293	0	14.0301	22.8273	4.8574	0
43.0263	66.7462	81.3341	45.5643	74.6527	79.6335	0	0	75.9335	57.1982	55.9751	46.329	19.932	61.1909	76.5305	24.5577	79.9553	63.7457	48.029	22.1749	36.2923	50.3833	27.7107	53.8689	78.8315	57.2613	76.3787	27.7864	73.8614	36.9155	56.4655	92.0258	72.2948	72.7296	0	0	0	25.8271	20.7748	0	17.7452	0	23.3862	6.9109	33.3333	41.8539	26.0763	0	0	15.4364
0	0	0	33.3333	0	0	66.6667	23.0399	0	33.3333	0	0	29.9608	0	0	0	0	0	27.8002	0	0	33.3333	0	25.6489	0	0	0	0	0	0	33.3333	0	0	0	33.3333	92.7398	81.1636	0	50.6599	54.5107	39.6862	24.9612	66.6667	55.2747	26.1184	21.6363	30.8125	21.1901	13.0203	30.9368
8.24543	0	0	0	0	0	11.1079	30.4177	0	0	11.5736	33.3333	33.3333	22.091	0	0	0	0	0	26.0718	7.0419	0	0	0	0	0	0	44.8726	0	16.4562	0	0	0	0	22.1905	0	0	0	0	33.3333	0	0	0	12.6141	0	0	0	27.7449	0	0
0	7.03121	0	0	0	0	0	0	0	0	10.6915	0	0	0	0	8.77559	20.0447	9.40184	11.1202	11.1584	0	16.2833	0	0	10.1161	0	0	0	0	0	0	0	0	0	0	0	0	0	12.5585	0	26.9805	33.3333	0	0	0	0	0	3.813	50.6473	5.68248
20.6268	0	5.93118	18.264	19.2674	9.01354	0	0	11.1428	0	0	0	0	0	4.49477	12.5436	0	4.37926	5.5331	0	10.4685	0	5.62264	0	0	0	15.0132	0	9.62796	0	0	0	9.90281	13.9281	0	0	0	24.9793	7.00178	0	10.04	3.96641	9.94709	2.79167	0	0	0	0	0	0
11.3642	0	7.33981	2.83835	0	5.72459	5.80307	0	12.9237	3.66029	8.21728	7.29117	13.4014	5.47578	5.68	0	0	0	0	15.2446	2.49695	0	0	0	0	0	0	0	16.5106	29.7511	0	0	0	0	0	0	11.4651	0	0	12.156	0	0	0	0	0	0	4.98848	0	0	15.1339
0	26.2226	5.39489	0	6.07991	5.62836	0	0	0	0	0	13.0465	0	0	13.2947	0	0	6.49789	7.51755	0	19.9059	0	0	12.7978	11.0524	42.7387	0	9.68698	0	0	10.2012	0	0	10.2044	0	7.26017	0	15	0	0	0	13.7403	0	0	0	11.6971	7.25707	6.69303	0	12.2144
3.01357	0	0	0	0	0	0	0	0	5.80814	0	0	3.37249	0	0	7.61491	0	15.9754	0	0	4.19022	0	5.91449	7.68442	0	0	8.60814	0	0	4.82778	0	7.97417	17.8023	3.13796	0	0	0	18.9427	0	0	0	0	0	22.4087	18.719	0	0	12.1432	20.4991	20.596
0	0	0	0	0	0	0	26.9601	0	0	0	0	0	0	0	8.43264	0	0	0	0	0	0	0	0	0	0	0	0	0	0	0	0	0	0	19.059	0	7.3713	15.2509	9.00496	0	5.54814	4.40568	0	0	0	24.8128	16.8356	5.58839	10.9758	0
0	11.6708	19.5804	12.2576	10.2482	0	0	9.04173	17.0841	29.5592	16.8068	0	8.73076	15.4389	0	0	0	0	41.3193	33.3333	25.3954	18.1634	0	15.0442	6.00997	0	0	18.6968	6.9425	36.5415	18.2751	31.0405	0	0	0	7.10826	15.5436	0	18.6402	6.88562	7.11369	28.3131	8.45731	12.9362	0	0	0	0	8.39062	7.49624
56.7316	22.2534	0	19.7416	33.3333	44.965	50.946	0	28.798	0	66.6667	62.5066	14.2813	19.9184	33.3333	33.519	56.1456	16.7689	13.7025	11.8352	25.175	36.7673	33.3333	21.1747	25.6334	31.8533	9.48617	10.0458	9.22221	0	24.5126	0	0	39.0045	4.28027	15.0705	17.9739	14.1501	9.31783	10.2289	30.0187	0	10.3812	0	23.8039	23.9427	0	6.09668	26.7124	11.5173
0	0	26.4014	0	5.88774	0	0	0	0	7.788	0	0	0	0	59.6999	0	0	19.0112	0	33.3333	33.3333	0	19.7291	24.1559	0	0	26.4369	10.7036	20.2597	0	0	0	66.3447	0	0	11.7806	0	0	0	0	0	0	17.3168	7.58183	0	33.3333	0	21.7114	0	0
0	0	0	47.0033	23.0852	22.7981	0	5.21896	1.32636	0	9.49599	0	12.5855	30.8632	0	0	0	27.5266	0	0	0	0	0	0	0	24.7515	33.3333	17.2432	8.31453	1.80056	0	15.6154	0	9.02676	0	33.3333	0	4.70961	25.275	25.7627	11.5319	0	21.214	30.7882	14.7796	33.3333	66.6667	0	17.8181	0
4.19471	28.8458	35.7405	7.37229	5.69758	0	16.7155	50	16.2493	33.3333	0	19.2317	13.2311	0	0	17.8658	0	0	0	0	7.93796	13.7391	33.3333	30.4478	31.844	0	0	0	0	0	34.6541	13.7638	0	0	33.3333	0	28.1357	3.43791	24.1523	3.54365	9.43074	24.0393	0	0	12.8662	9.39059	19.2799	7.90649	24.9427	17.4234
17.1722	0	6.93189	0	0	8.72794	15.7132	0	0	0	0	4.30778	0	0	0	0	43.8544	30.8865	18.3315	21.4981	0	0	0	0	0	17.0141	0	0	6.48248	17.6016	0	0	0	0	62.3864	0	0	0	0	2.72772	0	14.3142	0	0	0	0	0	0	0	12.3871
0	0	0	0	0	0	6.20559	0	12.039	9.13777	0	0	15.1966	0	0	0	0	0	0	0	0	0	0	0	0	0	10.5046	7.37626	0	23.0854	0	0	0	14.4155	0	14.3165	0	26.0831	0	0	0	33.3333	0	25.7515	24.3085	0	0	28.617	6.62093	19.3042
21.9015	12.0056	11.3457	13.6253	0	0	0	0	0	0	7.03054	0	0	0	6.96679	20.7084	0	5.80672	0	0	8.1583	15.1699	0	0	0	8.58184	0	13.3046	13.0737	0	2.30693	5.12899	0	13.2466	0	0	12.6953	0	22.6147	7.57062	3.3146	0	30.5385	11.6215	0	0	0	0	15.5153	0
0	0	0	0	0	0	0	0	0	0	0	0	0	0	0	0	0	0	7.0159	0	0	0	0	9.17746	0	0	0	0	0	0	0	0	0	0	0	14.4444	0	51.6193	0	0	0	0	0	11.3208	0	0	14.0535	0	0	0
0	25.2244	0	0	21.748	23.5089	10.4197	35.7393	24.5033	20.1817	0	13.9539	35.9747	33.7795	0	27.9068	0	0	19.6309	0	0	16.1603	13.6042	0	36.5127	17.7992	20.239	22.6297	35.705	20.971	20.2513	34.4513	33.6553	24.3066	0	3.94634	25.6515	0	0	43.2807	38.5904	0	12.0922	0	24.2419	0	0	35.6685	0	31.8718
50.5184	41.9299	65.1288	56.2861	54.6954	24.7328	49.3994	30.0758	37.5022	42.3842	62.6909	33.4145	20.4753	18.1276	56.9917	40.5851	82.5235	57.4665	40.5186	82.1112	56.3798	44.3642	43.2605	64.7648	25.0273	52.0456	45.827	39.5069	19.1701	44.3962	50.8514	24.4718	24.3008	44.1782	15.3763	12.2233	26.6976	33.3333	20.498	0	20.6226	30.75	40.3068	12.1007	22.2686	25.1913	32.8622	14.3063	12.6078	5.73038
0	0	0	0	0	0	0	0	0	0	0	0	0	0	0	0	0	29.3164	0	0	0	0	0	0	0	0	0	0	0	0	0	0	0	0	42.6441	18.4875	0	0	37.3546	26.8226	0	0	0	53.6161	33.3333	43.5759	0	0	25.172	0
0	0	0	0	0	19.0188	7.93284	0	0	0	0	0	0	0	0	0	0	0	0	0	0	0	17.9592	0	13.1721	0	0	0	0	0	0	0	0	0	0	0	0	0	0	0	0	21.1214	0	0	0	0	18.3969	9.03663	0	0
13.7181	0	5.47717	2.42299	3.44659	19.4515	0	0	5.59371	0	0	12.1119	24.6766	33.3333	0	37.017	0	0	0	0	14.8073	0	0	0	25.5932	0	0	0	0	15.9754	0	0	33.3333	0	0	12.4124	0	23.5706	0	0	0	8.82985	19.9028	0	0	0	0	0	0	0
0	6.83966	12.6686	12.6329	15.707	8.60058	0	12.7013	19.069	25.3737	9.33058	20.8251	6.65986	0	14.2135	0	0	0	5.8477	0	0	10.206	4.74961	11.0582	0	29.0543	4.30445	13.0395	0	13.6244	0	0	33.3333	17.1666	13.5017	0	30.577	0	6.13536	52.9937	25.133	0	0	21.2326	0	0	8.22691	0	3.93338	30.7148
14.6204	2.7892	0	0	0	0	17.1343	19.2452	0	15.3813	7.86128	0	33.3333	16.3621	2.99926	3.80029	0	0	0	0	0	33.3333	13.0603	0	0	0	0	0	9.17874	0	0	31.4784	9.03256	33.3333	1.45929	9.36904	24.8623	0	0	0	0	0	12.862	0	22.5008	18.411	2.18513	0	0	33.3333
19.6152	0	0	0	1.31762	0	0	0	7.57853	0	0	0	0	15.2057	0	9.66698	0	0	0	6.70808	0	0	0	0	16.0462	0	13.7948	0	0	21.9722	0	0	0	0	0	20.9209	15.1068	0	0	0	0	0	13.4979	6.48283	0	0	26.8963	33.3333	20.7255	0
0	7.4401	16.7255	18.0796	5.72682	0	0	17.1132	0	0	0	7.76338	6.19821	0	4.87546	0	17.4765	8.29363	4.57774	0	19.3187	6.35798	15.3741	24.177	0	4.27899	0	5.32236	14.1632	0	49.1486	8.86154	0	5.32183	0	0	0	0	36.012	0	33.3333	26.3576	0	6.5677	0	4.67982	0	0	0	11.8648
1.5279	33.3333	0	0	17.6263	28.1964	17.8555	7.22287	19.5084	16.8609	11.8911	25.8852	8.65672	16.9712	20.92	0	0	4.9235	0	0	0	5.73845	5.59621	0	0	14.6211	2.74038	33.3333	0	0	0	35.1882	0	0	0	26.5868	0	9.7627	0	12.1135	12.7108	12.9412	0	0	10.8325	0	4.39321	43.3237	37.5612	0
0	7.66784	0	10.5784	1.4802	0	7.67804	13.6416	10.7481	0	8.22613	0	0	0	0	8.93069	0	0	15.7226	11.1807	9.49416	0	0	0	20.1613	0	0	8.79788	57.4879	4.03176	0	0	0	0	27.0186	0	2.75635	33.3333	0	8.07018	8.20037	0	13.4305	0	11.0648	8.14208	7.03934	0	0	18.3566
37.8243	1.69163	0	19.6851	6.3603	0	0	0	0	0	18.0639	0	5.75126	0	0	7.37808	0	0	7.48244	4.59252	4.87719	0	2.63464	2.40224	5.69112	0	0	1.64992	0	2.02552	0	10.5842	2.99931	0	12.9839	0	7.8796	10.4823	0	0	4.68539	0	0	5.61167	9.79324	9.1874	0	16.719	0	9.68582
0	0	1.76926	0	0	2.31828	0	0	0.600116	1.84542	0	9.95201	0	1.89586	0	0	0	0	0	4.39285	0	2.82213	0	0	0	0	0	0	0	7.11297	0	0	0	1.41986	0	1.37573	0	0	0	33.3333	11.8114	0	0	20.8138	33.3333	0	23.8963	0	0	9.88799
0	6.47831	5.39529	11.7198	3.051	0	3.60586	1.58785	0	0	0	0	0	1.91797	3.05187	0	10.0708	33.3333	0	4.61437	0	1.29937	13.6076	0	0	0	14.7808	0	0	4.13198	0	0	0	9.84554	11.2334	0	0.844338	33.3333	8.27766	19.3447	0	0	0	0	2.41889	12.657	0	0	0	0
0	10.1062	0	0	0	11.7449	0	0	7.34099	1.62458	0	3.192	3.15267	0	0	4.92642	0	6.64036	2.40492	8.5226	4.05677	0	0	0	33.3333	12.6325	0	2.32482	0	0	2.96334	40.8858	16.5306	0	0	3.37776	0	7.71993	5.90643	0	13.7965	15.6594	3.97158	0	8.80134	24.1459	2.57251	7.65093	0	12.8398
14.4533	0	0	0	0	0	2.86345	4.69862	1.33019	0	18.4082	0	4.59557	0	1.95013	10.8335	0	33.3333	0	0	0	0	3.36304	3.20622	11.4245	0	0	0	0	2.88838	0	0	0	0	6.22529	5.6588	2.91105	0	2.96558	0	26.8533	0	2.05298	16.4107	0	0	0	17.8681	15.8497	23.6475
0	0	0	0	0	0	0	0	0	0	0	0	0	0	0	0	0	0	0	0	0	0	0	0	0	0	3.81904	0	0	0	0	0	0	0	7.07237	0	0	0	0	0	0	0	0	6.29613	0	33.3333	0	3.73913	0	23.4453
4.44193	0	27.938	44.274	0	0	0	15.4195	0	0	0	0	0	0	0	0	0	0	0	0	0	0	13.1788	0	0	0	0	16.2603	0	8.36426	0.801729	7.94348	0	15.4877	0	0	0	32.2046	0	0	6.48	0	0	0	0	0	0	0	0	0
14.3891	0	0	0	19.5403	24.9678	0	45.3014	25.9923	0	0	54.6174	0	31.4154	0	0	0	0	0	0	0	0	19.7257	30.9311	24.5191	33.3333	5.65073	0	66.6667	26.2204	0	18.8293	0	0	0	0	0	0	52.4826	21.2954	36.3734	8.32985	0	6.18659	14.7388	20.6763	0	15.4652	0	0
0	26.9791	0	0	0	0	29.3593	0	0	96.53	0	0	29.6043	33.3333	61.6647	0	0	0	33.3333	0	0	0	0	0	0	33.3333	0	31.0085	0	0	0	0	0	0	40.3851	89.5877	55.0317	0	0	26.0266	0	0	0	24.9308	0	0	9.43706	0	0	0
28.8914	54.7448	64.8974	24.3211	71.0484	60.969	64.1714	32.9927	64.7364	0	63.528	32.2386	56.8962	31.4375	33.3333	76.862	89.9292	26.693	56.7793	77.8777	91.066	95.8785	47.4902	63.4604	25.0319	20.7008	75.7494	48.7564	33.3333	49.2565	96.2349	21.7572	80.4701	73.2469	22.1	0	33.3333	16.2599	30.3678	0	0	76.0107	93.9754	19.7503	30.9144	0	64.0942	38.5576	84.1503	20.4935
49.4239	33.3333	27.5643	47.1857	0	17.7178	0	0	16.4871	0	28.5168	45.5193	0	0	0	0	0	57.9618	0	0	0	0	0	33.3333	66.6667	42.8104	0	0	17.7778	0	0	66.6667	0	0	0	0	0	40.5874	20.8017	55.8496	26.0553	0	0	19.3719	30.767	53.8523	19.0763	27.0468	0	33.3333
0	0	0	0	0	0	0	0	0	0	0	0	0	0	0	0	0	0	0	0	0	0	29.34	0	0	0	0	0	0	0	0	0	0	0	49.7023	0	0	0	0	0	12.5274	0	0	33.3333	15.4765	19.602	0	0	0	16.9476
0	0	0	0	0	0	0	0	0	0	0	0	0	0	0	0	0	0	0	0	0	0	0	0	0	0	0	0	0	0	0	0	0	0	0	0	0	0	33.3333	0	0	0	0	0	0	0	0	0	0	0
13.0481	33.3333	0	0	0	0	0	0	0	0	0	0	33.3333	0	0	0	0	0	0	0	33.3333	0	0	0	0	11.9358	17.1491	66.6667	18.231	37.7655	0	0	33.3333	33.3333	33.3333	13.7129	0	6.58102	0	0	0	0	0	0	22.7241	0	0	0	0	0
0	0	0	21.1481	0	0	33.3333	50	33.3333	0	0	33.3333	0	33.3333	56.2789	0	0	0	0	33.3333	0	0	0	0	0	0	0	0	0	0	0	0	0	0	0	0	0	16.6134	0	0	27.9708	0	0	0	0	0	18.9243	0	17.1854	0
4.19466	0	0	0	33.3333	33.3333	33.3333	0	0	33.3333	0	12.513	33.3333	10.5487	0	33.3333	0	0	0	0	0	0	3.99338	33.3333	0	0	0	23.9006	15.5556	0	0	0	66.6667	0	0	0	33.3333	0	0	0	9.78756	33.3333	33.3333	3.125	6.98001	11.5242	0	16.5692	0	33.3333
33.3333	0	0	3.3091	33.3333	33.3333	33.3333	0	0	33.3333	20.5803	0	33.3333	0	0	46.2539	0	0	33.3333	33.3333	60.4247	0	66.6667	33.3333	0	0	33.3333	0	0	0	0	33.3333	0	33.3333	6.77916	19.6205	33.3333	36.2182	12.5317	10.8171	0	0	33.3333	0	2.56631	5.19713	0	0	0	16.3857
0	33.3333	66.6667	12.1852	0	0	0	0	33.3333	0	4.81651	0	0	22.7846	0	0	0	37.3343	0	0	0	0	0	0	33.3333	6.04744	16.1842	0	15.1023	20.7504	66.6667	0	0	33.3333	0	33.3333	0	0	0	33.3333	0	33.3333	0	0	5.5977	7.61725	47.5904	6.28649	33.3333	0
0	0	0	0	0	0	0	0	0	0	0	8.63441	0	0	10.3878	20.4127	0	4.70398	0	0	6.24196	33.3333	0	0	0	21.3975	0	9.43276	0	33.3333	0	0	0	0	10.1852	33.3333	0	0	33.3333	0	0	0	0	10.8364	0	0	14.409	0	49.4812	0
0	0	5.76905	16.1719	0	15.6155	0	50	16.8462	0	12.753	0	0	0	0	0	100	0	0	0	0	0	0	0	0	17.8088	0	0	0	8.15073	0	0	0	0	0	0	0	0	0	0	23.6589	33.3333	0	33.3333	15.8883	2.20715	0	50.0975	0	0
14.3198	13.8045	14.9578	0	29.2346	5.31214	0	0	15.5453	3.91091	8.79491	9.98296	27.5786	0	17.8719	0	0	0	4.87288	21.4973	1.77924	21.7608	0	17.917	30.6834	0	8.5435	0	3.14023	0	0	19.8	53.3853	22.9908	0	23.1792	8.5413	16.0339	0	27.404	0	0	9.39024	0	14.9937	0	8.23332	6.81864	0	0
9.37744	7.2179	0	0	6.20796	0	39.5747	0	0	33.9798	33.3333	0	0	22.375	24.1933	27.8167	0	3.66995	25.787	18.0448	30.3907	0	29.701	16.1756	0	9.28115	15.7725	30.0243	11.4104	13.1445	15.9296	15.992	0	0	21.1985	0	9.77596	0	15.9734	0	9.56589	14.1698	30.297	22.3567	0	0	9.24379	0	8.06734	16.022
0	0	27.5683	23.6508	12.0889	7.41311	13.6858	0	30.7741	0	0	23.3474	12.1049	15.241	0	0	33.5082	0	0	0	0	21.2902	0	10.7036	9.6162	0	12.0519	0	2.5508	0	0	10.4337	0	0	0	0	0	33.3333	12.8719	8.68914	0	0	4.62398	0	0	44.3721	13.5191	23.1153	34.5189	33.3333
0	31.4584	0	0	0	21.8122	0	41.6778	0	0	13.6639	0	6.88445	0	0	0	0	33.3333	13.8996	3.92136	0	14.5695	33.3333	0	0	0	0	0	0	16.4144	20.0691	0	10.2873	23.4363	18.2447	16.5498	17.1274	0	0	20.1545	16.0938	27.1225	0	0	23.1036	12.7136	0	8.23708	0	33.3333
17.4445	3.41066	0	0	0	0	0	0	0	30.2108	0	0	0	2.96954	5.41699	19.9194	0	7.42456	0	0	0	0	0	0	6.64534	0	0	24.5349	15.356	0	33.3333	9.457	0	10.7383	20.1324	0	0	42.4594	0	10.9554	0	0	0	19.9147	18.3396	0	0	0	0	0
0	0	12.1937	21.8142	8.0157	0	21.5894	50	0	0	0	0	0	0	42.4734	3.89691	31.5592	0	0	15.183	44.2155	0	0	38.046	16.2155	0	24.7898	3.77121	5.25799	20.1889	0	0	0	0	0	19.4423	23.5574	0	33.3333	0	23.7674	0	0	0	0	20.6198	9.13242	0	0	17.3114
19.0135	0	26.4611	27.6296	17.3274	0	0	8.32221	24.0022	0	0	42.3256	0	0	0	0	0	33.3333	0	0	23.6146	0	0	17.1577	0	90.7188	21.2815	0	0	33.3333	0	0	31.0948	0	0	5.33248	0	0	7.11777	0	0	14.7933	0	44.31	0	13.9144	44.9142	33.3333	43.7087	0
39.8447	25.8548	0	11.5191	27.1254	46.6253	25.1501	0	29.6784	12.9389	0	0	53.432	23.0349	10.0444	13.4139	0	0	19.6794	24.9889	0	17.9822	36.9656	0	30.3404	0	0	0	0	0	30.6679	30.784	5.23265	12.7847	12.1348	12.3662	24.792	8.17329	20.4614	20.7827	50.5729	43.9143	19.3191	13.4186	43.5631	8.38024	0	18.2776	13.705	0
0	18.2537	18.8191	15.3862	0	18.8372	0	0	0	18.9595	44.2079	24.3441	0	36.3795	0	34.953	34.9325	22.2388	35.7611	16.3646	0	24.3973	0	0	6.49909	0	17.5608	41.6696	62.2846	16.9189	0	13.5333	0	30.0499	28.2896	11.451	16.2059	0	10.2422	12.0143	0	0	36.3696	0	0	0	14.9571	10.218	0	0
0	0	0	0	0	0	0	0	0	0	0	0	0	0	0	0	0	0	0	0	0	0	0	0	0	0	0	0	0	0	0	0	0	0	0	11.679	0	0	0	0	0	0	0	0	0	0	0	0	0	0
0	0	17.4496	0	0	0	0	0	0	0	0	0	14.0102	0	17.2323	0	0	0	0	0	23.9252	0	0	16.8649	0	0	0	0	0	31.6439	0	17.4755	0	0	0	0	0	25.4355	0	0	0	13.6702	0	0	10.5151	0	0	0	0	22.1408
73.9801	80.508	47.3657	88.0669	89.2096	82.7209	71.0483	43.0119	79.4486	70.4887	63.9551	74.5831	37.2293	38.7682	44.5707	45.527	100	75.9623	73.7559	82.0436	44.2883	27.2345	76.4145	0	67.612	79.7595	66.9782	84.3889	51.1213	46.8437	19.8937	46.2063	81.1454	82.4262	41.148	15.1129	50.0111	13.4863	17.614	48.6563	26.6287	28.5945	0	36.4608	0	56.2553	19.3669	18.6639	0	31.7243
0	0	0	0	0	0	0	0	0	0	0	0	0	0	0	0	0	0	0	0	0	0	0	33.3333	0	0	0	0	0	0	53.0127	0	0	0	21.8514	51.5519	0	21.2453	61.3865	28.8905	44.1515	17.9841	51.6991	0	56.9907	33.3333	46.5875	18.5876	36.0723	0
0	0	11.8917	0	0	0	0	12.2927	0	0	17.8389	0	19.3231	0	6.58013	0	0	6.43171	0	0	0	22.0079	0	47.4903	0	0	0	0	20.8464	0	0	15.8579	0	0	0	0	0	0	0	0	0	13.1087	26.8122	27.6963	22.8182	0	0	27.1581	0	0
0	0	0	11.9331	0	0	0	0	0	0	0	0	0	22.3938	16.101	0	0	12.2198	0	0	0	0	0	0	22.007	0	8.91138	0	0	0	0	0	0	0	0	0	33.3333	12.7617	0	5.10372	0	0	0	6.21391	0	0	6.59447	14.6694	20.3192	0
0	0	6.87319	0	0	12.8434	16.7719	0	0	29.5113	0	0	5.16254	0	0	0	0	0	0	0	10.6193	0	0	0	0	0	0	4.45332	10.4478	0	0	4.94043	6.24172	13.38	11.4819	18.2204	0	0	0	0	0	0	0	0	0	0	0	0	0	16.988
15.4607	10.635	0	0	0	0	0	22.354	11.0992	0	8.43198	12.4454	7.52708	8.80328	15.5159	5.79543	0	0	3.95193	8.73442	0	0	13.3659	0	10.381	5.5891	0	5.60431	17.5844	13.5351	0	0	0	0	11.1034	8.12532	0	12.0881	7.02565	0	0	21.9036	0	0	9.67595	10.4113	12.5922	0	0	0
10.5592	0	3.9921	0	3.72349	4.43567	12.1798	0	0	0	7.44852	6.59562	0	30.0347	0	15.3443	0	5.3862	22.2921	9.22201	0	50.7577	1.33869	0	0	0	0	0	0	7.97738	24.7253	0	9.45079	0	14.4152	0	16.6555	7.89786	5.28015	12.9066	13.0044	4.73884	21.4887	7.60634	0	0	14.859	10.3765	15.1863	14.3276
0	0	12.4277	0	2.31382	0	0	22.3414	9.45224	0	0	0	0	0	0	0	0	0	0	0	0	0	8.8809	0	0	0	1.56394	0	0	0	0	0	3.16212	0	0	6.98942	0	0	0	0	6.7046	0	0	22.0226	0	0	0	0	0	0
0	8.85701	0	0	4.75307	0	0	0	0	0	2.32549	6.37592	16.7478	0	0	0	0	0	0	0	21.1672	0	0	2.31138	0	14.6514	22.5465	5.5535	0	0	2.36829	15.52	0	4.19376	0	0	0	7.08535	8.69368	4.44281	9.51072	0	0	0	0	0	0	10.5445	28.4223	14.8194
25.5603	4.09733	3.79927	19.7101	12.5225	9.91577	0	0	0	0	5.02833	12.7051	7.49655	0	2.8385	19.9716	43.0936	28.735	11.0974	21.1	4.22546	3.5779	0	5.91288	4.45768	13.3255	5.4132	0	18.682	10.3986	0	11.9814	10.1064	0	7.75556	0	10.3148	0	0	5.64193	0	16.6343	13.277	0	15.4768	5.46995	8.1899	0	8.19347	11.4327
0	0	0	24.2621	0	0	7.8198	6.99648	15.8371	7.37253	15.7929	0	0	2.78187	8.09149	7.66344	0	12.4734	0	9.34295	6.32355	0	19.2375	0	13.8076	7.12949	8.85847	4.63458	11.0095	25.0161	0	0	16.3096	0	0	0	0	14.5483	0.481048	11.2546	25.0086	2.91236	0	18.4788	9.81032	12.1882	25.4132	12.6393	0	0
0	6.78817	0	9.41924	0	0	0	0	0	0	7.68238	0	0	0	7.84409	0	0	0	0	0	0	0	0	0	0	0	0	0	0	0	0	0	4.44321	25.4969	20.0697	0	0	7.14009	0	0	0	0	0	0	0	0	0	7.24705	0	11.9307
23.4098	9.83423	15.0397	0	8.48159	6.28289	0	0	0	0	0	6.26435	0	11.1226	0	8.79515	0	0	7.48643	0	6.71109	7.6721	40.4126	21.1964	0	10.6423	0	26.0582	0	0	19.0775	6.09689	0	12.065	7.59731	4.13831	0	6.88788	0	0	0	0	0	5.32365	0	17.2623	0	0	0	0
0	6.5014	14.2484	9.24541	6.46835	13.0281	5.77931	0	17.4089	0	0	0	15.2686	0	0	0	0	6.22014	8.20872	21.7911	16.1371	12.9202	0	0	0	0	9.02153	0	0	9.57271	0	20.9826	18.4721	0	0	0	0	0	0	7.99956	0	0	0	0	0	0	0	16.431	5.26316	16.0275
0	0	0	0	0	0	29.3445	0	0	8.26254	28.7537	0	0	8.23749	30.4948	0	0	0	21.1027	0	0	0	0	0	28.8757	25.4054	0	0	5.89431	9.12307	0	0	0	0	0	19.372	20.6594	32.9942	19.3431	15.5395	11.9349	34.372	20.4081	0	45.0397	7.19055	40.4405	6.20132	38.8738	0
0	49.2798	18.2936	9.07124	55.4174	26.7926	26.1539	28.8854	46.5918	22.9375	10.1472	20.3981	0	55.544	0	34.2315	0	31.2199	13.5361	0	21.951	0	0	58.5858	33.7959	0	48.1538	28.6988	0	0	74.9011	0	0	27.2753	0	0	0	0	27.5782	0	26.5799	0	33.3333	0	0	0	0	0	0	0
33.5912	23.4991	48.619	22.3623	0	43.9807	0	50	0	31.9134	0	27.069	18.0647	0	25.2418	0	56.9064	0	0	19.2724	12.9708	75.8298	19.5825	0	0	23.5812	24.3118	40.6085	21.9066	11.3393	0	48.5884	38.8308	21.2684	25.5778	49.6672	23.0186	26.4454	19.2419	0	0	0	0	33.3333	0	20.6728	25.9564	0	28.0702	60.6091
0	0	0	0	0	0	21.5175	0	0	19.1182	20.0663	25.3806	0	22.314	25.4892	13.3617	0	13.4507	25.1246	17.0096	0	0	14.0959	0	0	15.5616	0	0	22.3238	34.5502	0	12.3507	11.838	13.8944	25.736	26.8225	46.0073	11.0594	33.3557	59.5645	36.4766	32.2997	32.9815	42.8642	29.6732	37.2161	0	57.4814	9.25408	0
17.4388	0	0	5.92956	17.1102	0	9.38502	14.1181	20.1621	10.3958	12.5291	8.18289	59.1701	0	0	15.9766	0	7.90086	13.4441	11.484	31.681	0	6.67154	14.305	19.0631	4.35461	4.24124	0	20.1838	0	6.02135	0	0	0	13.2636	0	0	0.924681	0	0	0	13.7816	0	0	0	0	0	0	10.3453	0
12.5359	0	6.90453	0	0	0	0	0	0	0	0	0	0	7.2731	0	0	0	0	0	0	0	0	0	0	0	0	0	4.04825	0	0	0	0	0	0	0	0	0	0	0	0	0	0	0	0	0	0	6.88799	0	0	16.6909
0	0	0	0	0	0	0	0	0	0	0	0	0	0	0	0	0	0	0	0	0	0	0	0	0	0	0	0	0	0	0	3.36045	0	0	0	0	0	0	0	0	0	0	0	0	0	0	0	0	0	0
0	0	0	0	0	0	0	0	16.0489	0	0	0	0	0	0	0	40.9236	14.1899	0	16.0102	0	0	0	0	0	0	13.0315	0	0	0	0	15.0253	0	16.2449	0	0	0	0	0	0	0	0	0	0	0	0	0	0	0	0
87.4641	57.8028	76.7667	88.0875	90.0921	0	33.3333	0	0	0	33.3333	33.3333	42.8099	17.7279	33.3333	0	0	19.193	66.6667	0	64.012	50.0202	33.3333	0	33.3333	61.6819	52.1535	0	0	55.5445	60.9736	17.8591	0	20.0871	0	0	11.0825	0	0	0	33.3333	0	21.3125	19.7999	0	0	0	17.871	0	0
0	22.5217	0	0	0	90.7721	60.728	86.6809	66.6667	100	64.617	66.6667	33.3333	59.3936	45.7047	95.76	0	33.3333	33.3333	66.6667	19.6778	33.3333	54.2555	86.8535	66.6667	33.3333	0	95.9518	94.0395	33.3333	0	29.9729	100	33.3333	47.9787	100	47.5721	87.8769	87.1412	93.5886	66.6667	66.6667	66.6667	66.6667	100	100	44.2638	33.3333	49.0182	49.9757
0	0	0	0	0	0	0	0	11.9814	0	0	0	0	0	0	0	59.0764	19.1434	0	17.3231	0	0	0	0	0	0	0	0	0	0	33.3333	25.2606	0	14.2608	24.0894	0	22.2508	0	0	0	0	19.9614	0	0	0	0	33.3333	33.3333	14.4375	0
0	0	4.84308	0	0	0	0	0	0	0	0	0	23.8568	15.6054	0	0	0	14.1404	0	0	0	16.6465	0	8.80503	0	4.98473	5.53805	0	0	0	5.69307	0	0	13.2462	0	0	0	0	0	0	0	0	12.0209	13.5334	0	0	15.5149	15.4623	0	33.3333
0	8.8639	0	11.9125	9.90786	4.25325	0	13.3191	5.30303	0	0	0	0	0	5.68554	4.24001	0	0	0	0	0	0	0	4.34146	0	0	29.2769	0	0	11.1221	0	0	0	0	4.34311	0	19.0946	12.1231	0	0	0	13.3719	0	0	0	0	0	0	0	0
0	0	0	0	0	4.97461	0	0	0	0	2.04964	0	0	0	0	0	0	0	0	0	16.3102	0	12.4112	0	0	0	0	0	5.96053	0	0	8.5217	0	0	0	0	0	0	12.8588	0	0	0	0	0	0	0	0	0	0	0
0	10.8116	11.4857	0	0	0	5.93862	0	0	0	0	0	0	0	15.2764	0	0	0	0	0	0	0	0	0	0	0	0	0	0	0	0	0	0	2.82765	23.5888	0	0	0	0	6.41136	0	0	0	0	0	0	0	0	36.5443	0
48.9615	0	31.9806	0	0	25.3616	0	17.5766	0	11.1968	28.9723	0	25.9111	12.1892	10.124	39.0849	0	0	51.457	0	11.7162	19.963	0	31.2928	10.1684	15.0721	0	32.375	9.76737	15.7264	0	12.5774	6.79624	0	0	43.5106	0	29.3198	18.7758	18.7547	17.543	26.698	26.9312	11.6393	16.5354	25.117	0	13.9351	0	23.0431
0	42.1997	0	29.2001	64.4546	15.5327	10.225	0	21.1884	21.5947	9.01624	58.7307	28.8276	24.1472	13.7849	17.6323	50.6406	28.578	0	14.509	10.6369	55.6278	27.4612	66.6667	0	37.0488	18.4763	0	11.0725	25.7396	78.8195	43.9105	33.3153	19.2942	15.6054	0	57.5005	16.0162	21.6833	14.1161	0	33.3876	55.5557	34.1043	37.8283	22.7382	37.7064	28.0857	33.3333	0
0	20.3578	0	0	0	0	17.6442	23.5933	0	0	0	0	0	10.0028	0	0	0	22.4337	0	19.0198	0	0	0	0	40.5585	0	0	9.49186	24.3604	0	0	0	9.42663	16.0551	0	0	0	0	33.3333	0	0	0	0	0	0	0	30.1878	0	0	23.1319
8.96295	0	24.0157	25.5374	0	6.61642	0	18.9694	15.5161	0	23.213	0	0	0	0	0	0	0	28.2127	0	0	13.3704	22.8368	0	0	0	16.6341	6.76277	0	0	0	9.83142	0	0	20.0657	30.5446	0	11.7403	0	0	0	0	0	0	0	0	0	0	14.3184	0
0	0	6.33191	5.87169	0	0	20.8209	0	25.035	20.7383	13.0468	0	0	0	23.0338	16.8064	25.354	21.9873	0	37.547	15.1691	0	0	0	0	0	0	5.08332	22.2608	0	0	0	0	0	33.3333	0	2.28184	9.0312	0	39.0914	48.8509	9.28908	0	12.7472	0	12.6362	0	44.5764	0	0
16.3816	0	0	0	13.2873	15.7683	0	0	0	0	0	0	13.5053	17.6337	14.5279	0	0	0	0	0	0	0	17.2882	0	0	0	16.6178	0	8.97295	8.23536	0	4.4211	7.75259	9.31106	0	0	15.004	4.01357	20.2409	2.76653	0	0	0	20.4847	9.22214	21.3787	0	0	0	0
0	0	0	0	0	8.90818	0	0	0	0	0	7.42937	2.15883	0	0	3.83915	0	16.1014	0	0	23.0299	0	0	0	0	0	0	0	23.566	24.6355	0	0	0	41.3798	17.7279	0	14.3232	0	0	0	0	15.8214	0	0	0	0	18.0938	0	12.6878	10.2014
13.8777	0	28.3542	11.3622	0	0	0	0	11.327	0	0	11.8852	10.6778	36.0271	0	8.65172	0	10.8996	15.2096	0	0	0	10.4966	0	0	18.2612	48.2718	0	0	17.607	0	20.7913	0	0	13.2676	2.62487	0	0	0	0	9.37093	14.804	6.22792	0	16.2846	10.5951	3.14557	0	0	23.7062
11.8162	37.4425	9.31767	28.0286	22.2581	17.8006	38.31	26.4067	26.9336	46.4702	25.7516	10.9966	5.26343	0	38.5295	13.9855	24.0054	0	5.12059	14.6107	29.1444	3.38913	18.0529	2.04052	49.2732	29.6178	0	46.287	0	8.05621	21.1805	8.46834	42.7093	13.9599	0	23.3199	0	29.879	0	16.4507	24.2352	0	4.8831	21.0245	0	7.53476	0	13.4028	19.0149	0
0	0	0	0	0	10.0122	12.9998	13.454	0	0	0	10.958	13.656	0	0	0	0	0	0	14.3135	10.3034	7.64976	3.86432	0	0	0	0	0	0	0	0	0	0	0	0	0	10.8904	0	5.96667	8.82055	0	0	6.40208	0	20.1295	0	10.8664	0	20.6456	19.9174
0	0	5.24422	0	0	0	0	0	0	0	0	0	0	0	0	0	0	2.45323	2.44943	0	0	2.78187	0	0	0	0	0	0	0	6.91565	0	0	0	0	0	3.84921	0	13.9901	0	0	0	0	0	0	0	0	0	3.66712	12.5499	0
0	1.68053	0	0	0	0	0	0	0	5.40741	0	0	0	0	0	7.05312	0	0	0	0	0	0	0	8.09774	0	0	0	0	0	10.2899	5.04728	4.05614	3.5989	0	16.7838	0	13.0139	0	0	0	10.8104	0	3.22047	7.39612	7.67166	0	0	4.87843	0	0
3.67403	0	19.0107	6.47998	4.86914	8.72595	4.43385	0	9.02064	0	14.0325	11.0823	1.3312	17.563	10.1113	8.23372	29.4771	3.71999	8.82463	6.74728	4.04289	0	6.59283	5.35559	5.62859	9.06624	13.5796	3.99771	3.67876	0	9.59923	3.57945	0	0	0	0	4.40795	0	0	0	7.02321	31.0233	0	10.5558	0	0	10.9307	9.81141	0	27.0934
14.4298	14.8252	0	0	13.0981	13.564	0	17.7346	9.77959	5.92485	0	7.82675	9.7262	6.90794	0	0	0	8.60818	19.5967	17.1325	0	8.89623	0	4.09058	7.09196	13.1907	12.4226	5.72445	29.6933	12.6407	0	0	0	0	0	11.8007	0	0	7.43126	18.0879	0	9.51315	14.4389	0	0	0	6.48352	33.3333	27.1469	0
0	0	2.70627	5.43638	0	0	9.84321	0	0	0	5.7413	3.75	0	0	0	0	0	0	0	0	0	0	25.1499	0	0	0	0	6.82745	0	0	0	4.71417	8.23265	3.46948	5.59547	0	0	5.50813	10.2808	0	12.3499	0	4.36557	0	14.0086	0	6.29949	0	0	0
0	0	0	0	0	0	0	0	0	0	0	0	0	0	0	0	0	0	0	0	0	0	0	0	0	0	0	0	0	0	0	0	0	0	0	0	28.9254	0	0	0	0	0	0	0	0	0	0	0	0	0
0	0	0	0	0	0	0	0	0	0	0	0	0	0	0	0	0	0	0	0	0	13.7327	0	0	0	0	0	0	0	0	0	0	0	0	0	0	0	0	0	0	0	0	0	0	0	0	0	19.8548	20.7834	2.71825
81.8962	83.4943	73.0388	71.069	54.6603	77.7101	85.7229	82.2654	81.1998	88.6677	80.2262	77.341	88.9426	75.5291	89.8887	84.7132	70.5229	85.2186	69.1292	76.1203	95.9571	24.4371	68.2573	82.4561	87.2795	77.743	73.9978	83.4504	66.6279	70.1538	85.3535	87.6502	88.1685	96.5305	55.7479	54.866	53.6528	69.0642	59.2354	81.9121	59.3047	35.6434	77.9751	82.0481	78.3197	66.6667	71.2538	28.4549	19.11	38.3602
0	0	0	0	27.3724	0	0	0	0	0	0	0	0	0	0	0	0	0	0	0	0	33.3333	0	0	0	0	0	0	0	0	0	0	0	0	0	29.4841	0	0	23.0525	0	0	23.8202	0	0	0	33.3333	0	0	0	0
0	0	0	17.0146	0	0	0	0	0	0	0	0	0	0	0	0	0	0	0	0	0	16.8188	0	0	0	0	0	0	0	0	0	0	0	0	21.8729	0	0	11.4376	0	0	10.5118	0	0	0	0	0	5.03247	0	20.4098	31.8282
59.2133	0	0	0	0	26.8141	0	24.3255	0	0	14.7524	24.9484	10.2783	0	9.8002	0	0	0	19.4125	13.5172	0	18.2689	24.5066	0	0	28.6838	17.5143	0	21.6941	56.5209	8.655	8.4133	6.18075	16.5165	0	0	0	0	18.7491	8.68571	0	6.35195	0	12.944	0	23.156	42.2787	22.2267	13.0296	0
0	23.7235	0	33.3333	0	0	16.2812	0	0	0	15.2855	0	0	0	0	0	0	0	0	29.1129	0	0	0	0	21.6295	0	18.8381	12.7225	0	0	0	0	0	0	0	0	13.2782	0	13.1471	18.6236	11.4143	0	6.83495	19.4321	0	0	0	0	13.5038	0
0	15.5359	18.8867	0	9.44378	0	0	8.05055	17.0769	2.92974	0	5.07519	0	11.4627	10.2532	27.6616	40.7659	0	17.3394	0	0	0	13.8008	11.2615	0	7.85519	0	0	0	0	0	12.1485	15.3305	10.0336	0	15.8273	0	28.0344	0	0	35.9296	22.6162	17.388	0	0	0	0	8.61557	0	13.4327
0	0	0	0	11.297	0	0	0	20.6402	0	0	11.9801	21.0219	0	0	0	0	9.90216	9.81305	0	0	0	0	15.3923	0	5.71598	0	0	0	0	0	0	0	0	0	0	0	14.787	0	0	0	0	0	12.6283	11.7433	15.7822	11.8306	0	0	16.3953
0	0	0	0	0	0	0	0	0	0	0	0	0	0	7.6557	19.335	0	0	0	0	20.7864	0	0	0	0	0	0	0	0	0	0	0	0	0	0	33.3333	0	0	0	0	0	0	0	33.3333	0	43.5106	0	5.03832	7.8134	0
0	0	16.1488	0	33.3333	14.7612	9.70167	18.1315	16.2151	30.3422	6.12757	7.87683	9.46412	38.3587	7.87701	0	0	0	9.45371	0	14.9274	48.3978	32.0489	0	32.2669	0	0	40.859	53.3419	33.7799	33.3333	40.18	0	30.0598	50.8317	24.7751	0	0	0	18.7002	13.9303	26.9814	0	13.9012	33.3333	0	0	0	11.5003	0
40.7867	60.7406	47.7799	33.3333	22.0363	33.3333	66.6667	0	16.2564	33.3333	18.581	42.6992	24.4745	23.5683	0	5.67169	59.2341	44.8499	6.91485	37.5537	33.3333	33.3333	0	73.3462	0	29.4745	63.6477	33.3333	0	0	58.0117	21.1848	45.3092	0	0	0	86.7218	11.7615	0	17.7576	0	20.0797	25.5193	0	44.8184	0	23.4686	23.9919	33.3333	19.9007
0	0	0	33.3333	23.8896	25.0913	0	0	0	0	33.3333	0	21.1703	0	27.7107	0	0	0	15.9939	0	0	0	0	0	0	12.6582	0	0	24.964	0	0	0	27.1526	33.3333	33.3333	26.0643	0	38.6323	34.7705	5.02283	3.21603	0	50.2577	7.76112	0	0	22.422	21.3218	0	50.2714
0	0	0	0	0	0	7.35045	49.4925	12.6931	33.3947	11.9203	7.42034	13.5909	16.9029	21.0471	33.3333	0	23.4312	0	19.8161	12.547	0	29.6437	0	46.1036	0	0	0	0	9.69914	0	18.0733	0	10.0568	15.835	0	0	0	33.3333	0	10.0779	23.9707	0	0	0	17.5511	0	18.8057	12.0162	0
0	0	17.1845	0	0	0	0	0	17.1182	0	0	0	0	9.70746	15.6561	13.9984	0	21.8168	21.0726	0	18.406	0	0	0	0	15.6123	0	13.0852	0	0	0	0	6.02698	0	0	0	0	6.78482	0	31.21	25.4319	0	0	0	10.1049	0	0	0	8.80347	0
28.4229	40.8378	16.6921	42.5202	0	0	0	0	0	0	0	0	25.6276	0	0	0	0	0	0	0	13.7418	23.5689	0	32.4708	21.1868	0	3.91358	0	16.9484	0	0	17.0457	0	0	0	0	0	6.20601	0	0	0	0	0	28.247	5.91742	0	3.6423	26.2868	0	0
17.5089	0	21.3762	0	41.9176	42.365	18.8899	0	16.13	0	22.636	15.955	0	33.3333	0	16.2653	0	16.1852	11.7686	8.53329	15.7189	66.6667	33.485	12.0023	14.9133	0	12.1351	0	10.7546	20.2481	47.3963	18.5709	21.8438	44.7798	0	27.9502	12.633	0	0	0	0	0	0	0	0	17.0095	0	0	2.82242	0
0	0	28.4702	0	0	15.2398	36.3404	74.5192	12.3684	86.9225	6.21191	40.3343	37.8894	33.1203	46.1585	27.5128	78.7379	35.7931	24.7973	23.3791	33.3333	0	0	0	15.1907	22.54	31.3272	41.3936	9.84794	22.1186	0	16.2223	17.5801	0	77.3748	61.6848	62.0688	11.031	61.138	67.518	3.96889	48.1192	77.974	25.5694	28.6198	54.3247	38.6935	25.2844	26.1568	40.492
0	13.5598	8.55207	0	0	0	0	0	0	0	0	0	0	0	0	0	0	0	15.3963	13.895	12.2656	0	20.1035	11.8591	0	14.4805	0	0	9.70718	2.3469	27.8076	0	10.6285	0	0	0	0	4.02232	0	0	33.3333	0	0	8.51379	10.3261	0	0	0	0	0
0	11.7468	0	12.9336	7.29019	0	0	0	0	0	4.47546	0	0	0	0	0	0	5.61103	0	0	0	0	0	0	0	0	8.45903	3.95386	5.4377	0	0	0	0	31.2172	0	0	0	6.65387	0	0	29.3644	0	0	0	0	9.70822	0	41.3823	10.1267	14.4667
3.5146	13.2767	0	0	17.3833	0	0	0	9.38087	0	3.76453	0	0	0	0	6.27757	0	9.36147	0	0	0	0	5.43454	21.331	18.42	18.3816	0	4.95507	0	9.24984	7.21231	10.7372	0	0	0	0	12.9215	22.3024	16.5175	12.4104	23.463	8.87157	0	21.5771	0	0	0	0	0	0
9.95897	0	0	0	0	15.6701	0	0	0	0	0	8.60334	0	0	0	17.0681	0	0	0	24.8	9.58512	0	0	14.4769	0	0	0	0	0	0	0	0	15.7533	0	0	0	0	0	0	0	0	0	5.93802	0	14.3841	0	0	7.04653	40.5099	2.59191
0	7.80799	12.9524	11.5392	16.5926	13.8408	30.5519	16.3472	0	4.43683	25.808	28.4922	22.4754	13.6957	0	0	21.2621	25.0285	25.1987	0	0	9.7644	21.0364	7.85992	0	18.8528	28.4632	0	0	10.7383	5.52577	0	22.7049	17.0119	9.05315	3.47958	4.59789	0	0	0	0	0	10.9462	0	0	0	0	0	0	23.5828
40.5946	12.7709	11.9571	33.007	16.8162	8.20219	14.2178	9.13365	62.1207	0	37.1042	6.61512	14.0076	19.8507	53.8415	32.8763	0	8.02068	22.8391	29.3925	7.32591	0	19.9405	0	18.1426	25.7451	15.7019	49.6975	47.3042	35.2983	12.058	24.1048	11.4895	6.99103	13.572	6.88548	7.77877	49.7845	9.50542	11.3017	9.87033	25.1454	5.14179	16.0926	32.1295	6.61557	57.6642	0	0	18.8666
0	0	0	0	0	4.68207	0	0	0	8.6407	0	0	0	0	0	0	0	0	0	0	8.02933	0	0	0	12.1466	0	0	0	0	0	0	13.3191	0	0	0	0	0	0	12.8391	8.76999	0	17.8638	0	0	8.62319	12.3419	0	0	20.3842	0
0	0	0	0	0	0	0	0	0	0	0	0	0	5.48963	0	0	0	0	0	0	0	0	0	0	0	0	0	0	0	0	0	0	0	0	0	0	0	0	0	0	0	0	0	0	0	0	0	0	0	0
0	0	0	0	0	0	0	0	0	0	0	0	0	0	30.7098	29.588	0	0	0	0	0	33.3333	0	0	0	0	0	0	0	0	0	0	0	0	17.2053	0	0	0	0	0	0	0	0	0	0	0	0	0	37.3487	0
86.2523	93.8644	84.6583	91.291	82.0788	88.3067	69.6435	73.2601	96.8964	68.9865	83.1347	77.5783	92.6159	64.6202	52.8268	58.305	76.4833	96.586	89.0458	93.8275	78.1053	61.5581	92.1848	82.1046	83.6415	100	82.6749	100	81.3026	94.5545	100	87.8004	78.8833	91.2562	60.5829	60.138	88.0664	0	23.8264	21.3279	63.5907	25.2533	79.2453	59.8894	78.7064	89.9856	47.6646	64.537	5.07325	56.7006
0	0	0	0	0	0	0	0	0	0	0	0	0	0	0	0	0	0	0	0	0	0	0	0	0	0	0	0	0	0	0	0	0	0	0	22.2938	0	100	59.0391	55.2024	0	10.4506	0	33.3333	0	0	33.3333	0	0	0
0	0	0	0	0	0	0	0	0	0	0	0	0	0	2.62352	0	0	0	0	0	0	0	0	0	0	0	0	0	0	0	0	0	0	0	0	0	0	0	0	0	0	22.7158	0	0	0	0	0	0	0	29.0509
0	0	0	0	9.95646	0	12.1142	0	0	13.416	4.53586	0	0	13.7929	0	0	0	0	0	0	11.3961	0	0	0	5.46118	0	0	0	0	5.44554	0	0	0	0	0	1.36648	0	0	0	0	32.8896	0	0	0	0	0	0	0	20.859	0
5.85452	6.13564	0	8.70903	0	0	0	13.8735	3.10361	0	4.49705	9.19967	2.55954	4.21843	8.57307	0	23.5167	3.41401	6.95726	6.17253	0	0	0	8.77944	7.13497	0	12.0765	0	0	0	0	0	0	0	6.08377	0	10.6034	0	0	0	0	0	9.28855	0	0	10.0144	0.916546	10.0189	0	0
7.89322	0	3.18648	0	0	8.39769	0	0	0	17.5974	0	13.222	4.82456	0	5.26678	8.36168	0	0	0	0	0	0	2.07243	8.75077	0	0	5.24857	0	14.268	0	0	0	11.3736	0	0	0	1.3302	0	0	11.4643	0	10.6175	11.4661	0	14.8645	0	0	0	21.2329	4.28241
0	0	0	0	4.14787	3.29559	18.2423	0	0	0	0	0	0	0	0	0	0	0	3.99693	0	0	5.10854	0	0.365146	0	0	0	0	0	0	0	0	0	0	16.128	5.16215	0	0	0	12.0055	3.51967	8.08002	0	6.77728	0	0	18.0855	0	0	0
0	0	12.1552	0	3.8169	0	0	12.8664	0	0	7.83234	0	0	11.8789	0	3.74532	0	0	0	0	10.4986	0	5.74275	0	3.76239	0	0	0	4.42935	0	0	12.1996	9.7431	8.74376	0	11.0395	0	0	17.1345	0	0	22.8827	0	0	6.42911	0	0	25.4441	15.4861	9.96602
18.6908	33.4594	0	9.0223	3.08014	27.746	0	0	29.3377	15.4593	4.59171	20.6542	29.59	16.1742	6.37658	18.0612	0	14.4302	19.2021	20.3916	17.4544	0	12.3341	12.1771	0	35.5812	3.99118	53.8682	16.2272	7.95406	12.1281	14.5518	0	11.7917	21.6194	5.32666	27.7567	14.1124	0	0	31.669	8.95475	0	15.7228	6.73065	15.6882	0	5.12627	22.4527	0
26.0645	9.0154	15.18	15.1151	16.604	0	0	39.5143	0	20.4562	6.31919	12.2253	0	7.59425	0	0	32.0901	0	0	0	0	37.767	6.0573	13.3152	0	0	0	0	5.07539	16.7815	13.6198	0	0	15.7722	14.636	0	17.9992	23.3806	0	0	8.74746	0	21.8025	0	0	33.174	37.9741	3.17418	0	24.7505
0	0	14.093	0	0	33.3333	17.7457	0	0	13.5771	4.83716	0	16.921	0	17.1453	0	0	27.4046	0	15.1469	7.07568	23.4433	13.5153	23.5438	10.3646	0	27.3279	0	16.2329	0	20.1429	0	0	8.56655	7.04167	0	0	0	36.8029	28.0595	0	15.1141	48.2877	24.8717	13.213	0	0	0	13.065	20.4571
7.87117	0	0	19.8921	15.6776	6.28588	11.1658	0	12.8197	0	0	0	0	0	0	6.46148	0	11.5042	11.7344	6.87587	6.5937	0	3.68608	0	0	16.184	3.97112	9.64123	0	22.8269	0	14.1786	23.5108	0	6.44364	43.6658	0	31.5602	0	15.0745	0	0	0	21.3527	2.08255	4.49328	20.9388	21.6733	3.03127	0
0	0	33.3333	0	0	0	0	0	9.63326	0	0	34.1123	0	0	24.5839	0	24.4394	0	12.8984	12.9089	0	0	0	12.8584	46.7545	0	0	0	0	0	10.8358	0	6.36816	0	0	0	11.5424	0	0	0	10.8835	0	2.77928	0	0	0	0	13.3029	0	18.3556
18.0305	0	0	18.2182	26.5072	11.272	7.03318	0	5.09691	13.0077	55.1714	5.2968	28.7644	30.273	28.4976	33.4521	0	15.2993	0	0	43.6445	0	20.1547	0	0	17.5181	21.9296	9.3653	11.9615	16.5518	3.01046	0	0	14.414	8.81328	0	12.3305	0	0	9.84829	3.45893	19.0929	0	4.46593	29.9842	8.60625	3.74235	0	16.1036	0
0	0	9.583	21.2549	6.7537	12.7828	23.0445	31.6045	0	0	0	0	0	0	0	0	0	15.755	21.3732	15.3317	0	16.1039	6.22683	9.7895	0	0	0	9.11342	17.1061	27.7498	0	0	31.8741	0	1.21339	33.3333	0	8.01899	23.3523	14.0507	13.7024	24.3786	0	20.4422	0	0	0	10.0916	0	12.8762
0	24.3179	18.1533	0	0	0	0	0	16.6489	0	0	0	7.90047	17.1591	0	0	0	0	7.5127	11.1586	0	22.6858	17.3132	8.29785	0	0	17.4092	0	17.1004	0	13.1904	17.8033	26.9652	0	0	0	15.3341	9.9527	0	0	0	18.2193	0	0	0	0	0	0	20.2683	0
29.343	33.2073	0	0	31.3774	8.58001	18.8433	10.4857	12.4953	32.6333	13.0604	11.9002	16.8242	28.7994	8.91113	17.6679	43.4704	8.5789	14.357	18.1865	13.2579	0	13.5912	20.0182	42.8809	30.7166	25.371	12.1635	16.2964	0	27.0725	20.1329	0	49.4555	13.9409	0	0	0	39.8448	18.2588	0	0	14.4601	13.1446	47.9896	13.1519	27.1253	20.0305	7.84939	14.9778
0	0	9.65737	16.4974	0	0	22.1675	18.3955	13.9683	4.86636	16.0201	15.8113	0	0	14.4855	24.3574	0	7.02786	12.9222	0	11.9737	0	7.12135	0	0	0	0	5.84829	0	8.13592	0	33.3333	11.2818	0	26.2917	17.6742	15.037	12.9751	0	14.7082	31.5387	14.2404	12.6704	0	0	24.8864	10.2195	26.6013	17.2297	8.58283
2.35907	0	0	0	0	0	0	0	0	0	0	0	0	7.71691	0	0	0	0	0	0	0	0	0	0	7.02427	0	0	5.56359	0	6.41359	0	0	0	0	0	0	5.07022	0	0	0	0	9.55324	0	7.60917	4.59379	0	0	0	0	0
0	0	6.10985	13.0492	7.21895	11.0007	0	10.5822	8.13008	0	0	2.29145	0	0	0	0	0	0	0	0	0	3.41587	0	0	5.25136	2.75417	0	0	0	11.0941	0	0	0	3.12856	5.25612	12.4502	0	0	0	0	0	9.68236	4.89557	9.98163	0	0	0	0	0	5.1748
0	6.36389	6.69023	0	0	0	5.98246	0	4.63323	0	0	8.30361	0	0	0	0	0	4.94847	0	0	0	0	0	14.0012	0	0	13.332	0	4.69463	0	4.98384	0	2.44124	0	0	0	13.2056	16.223	0	0	0	0	0	0	0	1.99146	0	13.3446	4.00244	0
7.9059	0	0	0	10.3748	0	29.0622	0	0	0	6.04795	4.59655	0	0	6.84379	0	0	4.69523	0	0	11.9102	7.92931	8.09701	5.20371	0	0	7.37425	0	0	4.00643	0	0	0	0	0	0	6.34921	14.7822	5.08153	0	0	7.20964	3.76499	0	0	0	9.33762	0	0	19.2567
6.84111	7.16525	6.2364	11.3603	15.1143	0	0	12.3652	13.9511	13.9972	0	0	12.0158	16.2366	13.7107	14.4457	0	6.66922	15.2872	16.302	0	0	12.1529	0	0	20.2289	13.1226	0	5.73151	0	9.98139	35.1786	11.4649	7.72268	0	17.8568	0	0	0	0	14.2696	13.8921	5.1063	14.9399	4.71924	8.72914	11.9132	0	21.0694	10.1521
4.96664	8.77179	5.01043	3.15085	5.87482	4.27006	0	24.2491	3.86602	6.39563	16.4772	10.4704	0	16.1173	0	4.48067	0	3.82609	25.1846	4.11899	23.3784	11.4396	0	0	5.13395	5.31854	0	11.4283	22.2888	10.3226	15.8772	0	0	8.02636	16.0954	0	6.23631	0	19.4081	25.766	17.666	0	8.32919	0	11.2924	0	6.19776	23.8777	31.0637	0
0	4.53215	6.19599	0	0	5.66475	8.92544	0	0	0	2.16061	0	0	7.54415	0	3.74729	0	0	0	0	0	0	0	0	4.13386	0	0	4.49104	0	0	0	0	7.87221	0	0	0	0	0	0	0	11.5787	13.1517	0	3.05574	0	0	23.9957	0	0	0
0	0	0	0	0	0	0	0	0	0	0	0	0	0	0	0	0	0	0	0	0	0	0	0	0	0	0	0	0	0	0	0	0	0	0	0	0	0	0	0	0	0	0	0	0	0	21.4202	0	0	0
0	26.1681	0	0	0	0	0	0	0	0	0	0	0	0	0	0	0	0	0	0	0	25.3009	0	28.1296	0	0	0	0	0	0	0	0	0	0	26.8344	0	26.9841	0	33.3333	22.2505	0	0	0	0	0	0	0	29.4443	18.1332	0
77.9273	46.9988	69.7571	72.4397	61.4171	79.0645	56.0299	52.8035	69.4196	79.6072	75.3143	74.338	87.9842	52.385	79.4455	77.3264	100	79.861	59.5281	79.579	64.7114	51.9144	79.7501	52.6655	78.4566	71.6984	66.1712	78.5171	67.2851	68.1632	69.1575	64.8214	78.2217	81.1224	51.8141	69.6929	42.1545	68.9949	42.177	51.9836	56.4857	46.5109	77.904	64.4136	79.3946	89.2794	27.1356	33.3333	25.7313	65.4164
0	0	0	0	0	0	0	0	0	0	0	0	0	0	0	0	0	0	0	0	0	0	0	0	0	0	0	0	0	0	0	0	0	0	0	0	0	0	0	0	0	0	0	0	0	0	31.4483	0	0	0
0	0	0	0	0	0	0	0	0	0	0	14.0351	0	0	0	0	0	0	0	0	0	0	0	0	0	0	0	0	0	0	0	0	0	0	0	0	0	0	0	0	0	21.0618	0	33.3333	0	0	0	0	0	0
0	0	0	0	33.3333	0	14.1266	0	0	0	0	33.3333	0	0	22.2875	18.4945	0	17.227	40.0163	0	50.6753	0	0	19.2201	0	0	0	0	0	0	0	19.6382	54.3529	0	0	17.149	29.0611	0	33.3333	0	4.92771	16.3437	12.0984	0	0	0	0	29.0043	20.2082	23.1985
21.9952	33.3333	16.7151	0	0	0	0	86.1434	19.9359	96.4248	13.7059	0	21.578	91.1208	23.0508	0	0	0	20.5809	0	0	53.0842	0	22.0246	0	22.7293	34.0541	46.6597	8.98133	14.1484	33.3333	0	0	10.0644	0	59.3546	46.8077	28.3179	66.6667	18.8729	33.3333	0	33.3333	33.3333	0	26.5014	33.3333	26.0108	0	0
0	0	33.3333	0	0	0	33.3333	0	0	0	0	0	0	0	0	0	0	7.01066	0	18.1413	4.77122	0	0	0	17.1847	18.7342	30.1064	0	0	48.2622	19.9663	0	0	11.901	33.3333	0	0	0	0	33.3333	12.1283	4.69974	0	0	33.3333	0	33.3333	0	0	24.2206
20.9988	33.3333	15.8396	52.9364	0	33.3333	19.2068	0	15.3513	0	0	33.3333	33.3333	0	0	7.88411	0	0	14.0517	0	0	0	0	40.152	0	0	22.5727	0	0	0	0	0	0	0	33.3333	16.1843	0	33.3333	0	33.3333	28.4056	0	0	0	0	0	1.88501	25.1701	46.4585	33.3333
33.3333	33.3333	0	0	33.3333	0	0	0	13.3974	0	33.3333	19.2982	33.3333	0	0	0	100	49.4397	12.7524	33.3333	0	0	52.8225	11.3087	0	0	0	33.3333	24.352	19.185	0	0	0	0	0	0	4.27223	14.1975	0	0	0	0	21.235	0	0	14.0136	0	0	0	10.1348
11.3382	0	16.6182	0	33.3333	0	0	0	0	3.57525	19.6275	0	0	8.87918	11.0458	14.8388	0	0	12.5987	0	15.9913	13.5825	0	7.29455	33.3333	58.5365	0	0	33.3333	18.4044	46.7003	33.3333	45.6471	21.4323	33.3333	7.31202	3.27221	0	0	0	21.205	33.3333	0	33.3333	0	40.1653	0	4.329	33.3333	9.11271
12.3345	0	17.4937	13.7302	0	33.3333	33.3333	13.8566	0	0	0	0	0	0	10.2826	33.3333	0	26.3227	0	0	28.5621	33.3333	33.3333	0	16.1486	0	13.2667	20.007	0	0	0	47.0284	0	23.2689	0	0	16.5867	5.01548	0	14.4604	0	24.5614	0	0	0	0	0	15.4858	0	0
0	0	0	0	0	33.3333	0	0	51.3154	0	0	0	11.7553	0	33.3333	25.4492	0	0	0	15.1921	0	0	13.8442	0	0	0	0	0	0	0	0	0	0	0	0	0	0	19.1358	0	0	0	0	0	0	0	19.3197	0	0	0	0
0	0	0	11.5134	26.2125	0	17.256	22.4488	21.4474	0	6.38553	15.1494	12.3078	25.6621	0	0	0	19.8968	0	8.21513	15.6854	0	3.29376	0	14.2691	15.1909	0	21.1827	20.4715	16.272	0	0	10.7139	0	19.5246	0	20.982	0	35.9664	29.9277	9.99367	0	26.4428	0	16.3262	0	9.51617	0	26.774	0
22.7701	65.5446	46.5105	9.59258	38.5226	25.386	27.4435	30.2429	5.66113	65.2537	16.3217	18.5554	25.3797	15.3926	0	9.48068	16.8837	18.4847	14.9524	5.86134	24.2558	79.2809	0	58.0614	0	0	7.51826	33.6797	0	12.2122	39.4342	12.4197	16.2661	5.90256	18.6187	21.0265	29.3219	6.47399	21.306	0	29.3466	11.1958	13.274	67.1432	7.49064	0	29.9069	51.5475	0	33.2916
10.5048	0	10.5742	15.2368	0	0	0	0	0	0	0	0	0	0	33.7753	0	0	12.3993	18.7744	0	0	0	44.0885	0	8.28341	8.16957	23.0058	0	0	17.0176	0	0	12.469	0	0	49.025	0	12.2209	0	16.5375	0	0	24.5126	0	25.0412	29.9095	0	0	4.15067	0
0	0	0	0	0	11.7422	0	0	0	0	0	0	6.01664	0	0	16.6429	0	0	19.6536	0	0	0	0	0	13.9014	26.6766	0	0	0	0	27.977	21.1709	2.86052	22.8808	40.9275	0	0	0	0	13.0769	0	21.1004	0	0	17.0071	0	9.89931	0	0	8.5389
0	0	0	0	0	0	25.5494	0	0	4.46448	26.9478	0	3.08839	24.2551	21.7829	0	37.1155	0	11.5565	25.1182	5.07756	0	0	0	0	10.9038	0	6.83441	0	0	0	12.4621	0	0	0	0	26.07	34.1578	0	7.81007	16.3981	0	0	5.65784	0	33.3333	0	16.0196	0	0
22.8285	0	10.0263	0	15.6526	10.6399	0	14.2326	21.5304	8.04834	0	24.5698	20.6654	0	0	23.8527	0	4.90502	0	48.5885	0	0	36.691	0	19.432	0	0	0	21.877	21.1211	13.96	0	0	0	0	12.3068	0	0	4.91803	13.0217	0	0	0	0	4.09894	21.0684	0	0	19.0337	0
25.2287	17.6203	11.2809	31.9378	7.12086	0	7.14448	9.5749	19.5001	0	50.3449	0	7.99024	0	0	50.0238	0	34.3707	14.5589	0	42.6527	20.7191	8.31426	22.656	18.6637	0	36.2949	10.6271	24.3182	3.81978	4.73015	10.7897	12.0484	27.4308	6.21449	9.68891	4.0114	0	0	0	23.3397	12.233	0	13.0446	0	2.03079	0	0	23.0532	0
0	0	0	0	0	27.6883	13.6737	0	0	10.7212	0	41.7254	17.5332	8.27969	32.8914	0	46.0009	0	0	0	0	0	0	0	25.4505	11.6671	19.6837	8.06452	33.3333	17.0613	0	33.0336	0	20.3161	0	0	0	21.1124	23.6815	0	15.7791	25.8619	6.89058	6.4661	25.8427	0	23.3813	8.27469	0	17.547
18.6679	8.16623	0	0	12.4914	24.5437	0	0	23.6889	11.5123	0	0	7.01869	26.4105	11.5504	0	0	9.9436	20.5042	12.2168	0	0	0	12.5786	0	20.7353	0	6.02769	0	12.4959	8.5423	10.124	36.8261	23.4697	14.7146	0	19.6147	0	14.1281	7.89135	0	0	8.82071	7.68822	4.19317	13.6579	13.3785	24.1582	10.9161	40.6225
0	8.66886	21.608	31.7195	0	0	8.93288	23.5008	8.17212	0	0	0	0	0	0	0	0	0	0	0	12.3285	0	7.61251	6.70403	0	6.65673	13.4973	13.5839	0	0	5.35637	0	8.8159	0	0	7.95276	0	26.0349	0	11.7347	5.14291	29.6089	20.0593	0	0	0	13.9178	0	16.0724	0
0	0	12.0491	0	15.3931	0	0	0	0	12.8629	0	0	0	6.93905	0	0	11.5494	0	12.0338	0	0	0	21.4251	10.8846	8.41959	0	0	0	0	2.09577	0	8.10731	0	0	0	3.94352	12.2451	11.1981	0	0	0	0	0	0	4.39566	4.62741	0	0	13.7731	0
0	0	0	0	0	5.15776	0	0	0	6.22739	0	0	0	0	6.74669	0	0	0	0	0	0	4.16667	0	0	7.48026	0	4.99254	0	0	0	0	0	0	0	0	0	21.0023	0	0	0	0	0	3.62727	14.6611	0	0	14.2291	18.4252	0	0
0	10.5276	0	5.0372	9.81275	12.2219	6.74911	0	0	0	4.39199	0	3.29347	10.2449	12.0246	16.9801	0	0	6.77826	5.71312	4.19584	13.0364	4.66718	11.565	0	6.15421	0	3.39123	0	10.004	6.92702	0	0	12.5149	0	4.99012	0	0	0	0	25.9613	16.5101	0	0	7.73688	6.80756	0	0	12.9975	10.1482
16.0269	7.20445	0	12.6405	12.8875	0	5.72355	12.8779	8.04767	0	15.9082	7.78123	6.93427	0	0	6.20684	12.5925	20.6449	0	4.32658	17.4132	0	0	6.37969	9.91572	13.8966	11.6962	6.20245	10.6957	6.90314	1.97539	10.6815	16.3681	0	12.2965	5.25466	21.7612	0	2.80339	8.31531	0	0	5.79752	0	8.71521	0	24.2884	0	12.0171	27.2038
8.15383	0	0	0	0	5.79924	4.69565	0	0	0	0	8.57295	0	0	0	0	0	0	0	0	0	0	0	5.06172	0	0	3.63917	0	0	0	7.76231	3.51978	0	14.695	7.43435	5.30817	0	0	8.44479	1.05297	0	0	0	1.1262	0	0	10.8742	0	0	0
0	0	0	0	0	0	0	0	0	3.45727	0	0	0	0	0	0	0	0	0	0	0	0	0	0	0	0	0	0	0	0	0	0	0	0	0	0	0	0	0	0	0	0	0	0	0	0	0	0	0	0
0	0	0	0	0	0	0	0	0	0	0	0	0	0	0	0	0	0	0	0	29.1375	0	0	0	0	0	0	0	33.3333	0	0	29.8136	0	0	0	0	11.5721	66.6667	0	0	20.1249	33.3333	0	0	29.881	0	0	0	14.2661	0
75.8192	82.2679	87.9509	82.3223	61.9067	76.8211	82.8317	87.1221	91.9523	77.4525	79.6998	83.6458	89.7723	56.4218	81.2287	76.8131	75.8581	79.3551	81.1879	89.9603	39.2073	82.797	73.9077	44.3406	74.1844	79.9492	79.672	90.4063	55.9709	80.9971	83.3353	47.8779	83.6319	72.7902	21.0368	56.3684	21.0883	22.1352	88.7518	90.6317	53.9138	33.3333	90.5752	84.2127	49.2713	62.0393	50.6083	48.2415	7.54314	62.648
0	0	0	0	0	0	0	0	0	0	0	0	0	0	0	0	0	0	0	0	0	0	0	21.7684	0	0	0	0	0	0	0	0	0	0	59.2323	24.1351	12.3311	0	0	0	0	16.8232	0	0	0	26.5258	0	0	0	0
0	0	0	0	0	0	0	0	0	0	0	0	0	26.3943	0	0	0	0	0	0	10.0462	0	0	0	0	0	0	0	0	0	0	0	0	0	0	0	0	0	0	0	0	0	0	0	0	0	0	33.3333	39.403	0
13.6236	0	33.3333	0	8.90241	0	0	0	0	0	14.1706	4.20095	0	0	0	7.27171	0	17.3631	17.3966	0	11.3326	0	0	0	0	14.2721	0	9.45819	0	0	12.5925	0	0	0	0	0	2.5123	21.559	12.2943	0	0	18.2189	0	0	4.28984	0	19.1449	0	12.6378	0
18.6282	29.3562	0	0	38.8324	10.4644	2.50667	0	0	0	0	0	0	0	0	14.44	0	0	0	0	0	41.9343	0	0	38.0999	0	0	0	8.72593	33.0765	0	10.3223	0	23.8148	0	0	0	0	0	0	21.6871	0	0	0	0	33.3333	0	14.966	0	17.2275
0	6.38318	0	23.0077	0	0	0	0	10.1142	33.3333	18.6832	0	54.4974	33.3333	23.0725	12.5174	0	18.0632	0	0	0	0	0	0	5.85762	9.74618	69.6495	9.55854	0	0	0	23.3655	8.36978	23.4613	7.22861	23.7061	39.124	0	22.3886	29.3937	16.8252	0	0	11.4079	16.8516	0	20.0552	0	0	33.3333
38.4063	0	36.8526	6.63463	24.4309	37.8439	0	50	66.6667	19.0688	0	30.3854	0	13.3439	46.5385	13.7612	0	29.9349	11.9461	26.5534	42.5693	15.2863	46.6537	0	22.5019	0	0	16.5754	13.5768	0	34.443	0	55.9347	0	0	13.2862	8.85991	0.961071	21.9359	0	0	38.0306	21.1976	25.9686	0	57.0375	30.9092	37.3547	11.2354	19.3361
0	0	0	0	7.72195	0	68.4613	44.0965	0	19.4285	29.2316	0	33.3333	0	0	0	100	0	33.3333	0	22.0007	17.7148	0	30.9584	0	0	0	33.3333	0	0	12.6265	23.011	0	0	26.3018	0	0	21.0812	21.039	0	21.5335	0	14.218	9.76358	20.3014	0	0	0	0	0
14.7051	0	0	0	0	13.2942	0	0	0	0	0	33.3333	0	33.3333	0	30.3473	0	0	33.3333	46.9612	18.4562	0	0	33.3333	0	19.0612	0	0	0	48.8258	0	33.3333	0	12.716	29.1872	28.3285	0	4.78113	0	0	0	0	7.73054	21.9254	8.93799	0	13.2781	0	33.3333	7.57098
14.6368	0	14.0246	14.6036	0	12.3553	0	0	0	14.2645	0	24.2444	0	0	0	0	0	15.2701	0	6.77991	0	5.02761	20.6684	0	16.1342	11.3895	6.08775	0	77.6973	0	8.25356	9.96785	8.38304	0	0	0	15.1903	10.2798	0	0	28.1543	8.83191	0	0	8.79563	0	0	8.81266	0	0
0	26.9501	0	0	0	0	0	0	0	0	19.1628	0	0	0	11.3624	0	0	0	3.99067	0	5.64121	0	0	0	6.06492	33.3333	5.79657	0	0	11.9489	0	0	10.732	0	0	20.0471	0	0	0	33.3333	11.7999	0	0	0	0	0	0	0	33.3333	0
0	0	0	21.7001	20.1123	0	0	5.90355	0	0	4.10174	7.83593	12.1692	0	8.7658	0	0	7.28663	0	0	0	0	18.9246	35.7083	0	0	3.06431	31.0746	0	6.14882	0	0	0	0	37.2825	0	0	0	0	0	0	0	12.1358	0	13.0319	0	6.84722	0	9.46012	13.9973
0	37.3104	15.7895	34.054	0	26.0423	29.032	0	23.2191	13.9048	14.6501	0	0	19.9894	10.2608	21.6624	0	12.082	0	19.7055	0	20.037	13.7532	0	11.3416	12.1976	15.4018	0	0	0	32.0845	0	16.5805	40.0078	0	14.6321	34.3135	41.3378	22.3421	37.273	0	34.9185	44.7181	30.9345	27.7916	9.62912	9.76526	38.8667	0	8.53488
47.0532	0	0	0	9.12306	7.68741	0	17.6692	20.5135	27.5868	0	20.4095	34.0843	21.4442	0	0	0	0	14.1384	25.8479	0	0	0	17.7001	17.9074	14.7652	0	9.18191	25.4001	4.08241	22.0205	12.0866	0	0	0	13.9998	0	0	7.56977	18.9212	0	0	0	17.2128	6.63623	34.4714	28.7915	0	0	11.4977
0	0	25.9259	0	0	0	0	16.4864	0	0	4.14796	0	12.9462	0	4.89885	8.22953	0	22.6339	16.4728	0	0	17.089	7.36927	0	0	0	0	11.3933	0	27.8331	0	11.7315	0	0	7.93716	0	0	0	21.6788	13.5194	39.9089	5.43611	0	0	0	0	0	0	9.39521	0
0	0	13.8358	5.13116	0	8.87305	20.1154	0	0	0	0	0	0	0	0	0	37.0479	0	0	0	44.0302	0	12.0601	17.0789	0	20.3362	26.2052	10.5929	0	0	0	26.1431	15.8265	10.9972	13.2402	18.5552	0	10.5317	12.2384	0	0	0	0	14.4355	0	0	0	0	0	9.31439
18.1129	13.548	0	0	0	0	0	0	11.7817	0	13.9588	11.3067	0	0	11.5528	13.4727	0	0	0	0	0	14.211	0	0	12.9845	0	0	0	11.7059	11.2783	10.1573	0	14.8325	0	0	0	15.7283	19.5602	0	0	0	21.9599	0	10.2119	11.8417	11.0575	19.2105	12.5813	14.8332	0
0	0	12.2287	14.6482	0	5.36584	0	0	0	14.7864	12.079	13.7309	19.5832	13.7746	20.3284	0	0	0	0	63.0072	10.1095	19.327	11.811	15.9112	0	23.5617	10.525	7.85569	0	6.21895	25.2411	0	0	15.2518	0	0	8.88753	0	0	0	0	6.39748	28.243	0	17.4411	8.59625	0	12.4656	0	27.7452
0	39.041	0	0	0	24.4603	15.9032	32.3308	0	12.7559	0	0	0	8.51599	15.4048	7.9143	40.6182	0	26.6687	0	0	0	21.2733	6.75785	27.5218	0	0	25.6887	28.5582	0	0	0	9.55136	0	0	19.3335	23.5196	0	28.4873	19.8139	33.5144	33.3333	0	8.30914	0	0	0	0	23.9381	0
8.64217	0	0	17.541	40.7687	0	33.3333	0	20.1055	0	0	0	0	0	0	25.1038	0	55.6687	6.11295	0	0	16.2443	20.4787	0	0	20.3474	17.0579	0	0	17.909	0	50.0388	0	0	56.9996	0	9.3789	41.9661	0	7.91252	0	0	33.3333	0	0	0	24.6	0	0	0
10.9713	33.3333	48.0097	0	33.3333	33.3333	0	33.5136	16.2577	0	38.9762	0	33.3862	33.3333	0	25.0528	0	21.6974	0	0	28.3983	19.1223	14.153	0	28.1024	0	29.9365	16.2957	8.08198	17.9726	0	0	17.5068	22.3362	21.8231	48.1114	24.4458	13.7731	30.0257	33.3333	19.1298	21.4997	21.7118	0	33.3333	37.0826	0	74.9532	33.3333	45.8546
15.2205	14.0776	0	52.0185	9.73034	20.2801	30.6481	0	0	44.8709	19.3745	32.5262	0	10.3845	34.8103	0	0	0	36.6072	6.56177	10.4893	14.0063	0	42.552	13.4838	20.9895	0	11.8126	11.898	14.7057	34.4889	0	23.782	18.0815	0	0	0	0	0	0	0	0	16.7119	42.0192	30.7476	8.79221	0	0	18.5002	5.58812
0	0	0	10.6611	7.04457	0	0	0	31.3416	0	11.4635	22.0266	0	12.5473	13.0049	20.2268	22.3338	0	0	4.58317	6.97275	0	12.8547	0	0	0	16.2754	7.17913	14.3559	0	8.09226	0	18.5008	33.3333	0	0	18.04	14.1689	0	6.49957	7.44692	11.3734	0	7.81142	0	0	27.3979	0	0	0
0	7.33868	0	0	13.8607	12.2613	0	15.3492	0	0	0	0	21.8152	4.50043	0	0	0	4.7958	0	11.8708	0	0	9.53966	0	0	7.74102	0	0	3.14999	14.0827	0	0	0	0	0	6.26871	11.828	6.21871	16.2551	0	11.0556	0	0	0	0	0	0	10.1039	0	25.9609
0	0	0	0	0	0	6.52383	13.3363	0	0	0	0	0	0	0	9.31668	0	10.4607	11.4274	0	0	0	0	3.33019	16.2911	0	0	0	0	0	0	5.19625	0	0	0	0	0	0	0	0	0	0	0	0	0	3.44541	6.47154	0	0	1.58587
0	0	0	8.28379	17.7077	0	0	0	11.3299	12.8612	0	13.0317	0	0	0	0	0	3.89659	7.29845	14.8472	24.8915	0	0	0	1.91075	0	3.35338	0	0	0	0	8.26538	10.8305	10.707	0	0	0	0	0	0	0	26.0133	0	0	4.82596	0	11.6953	0	26.8417	0
25.2581	16.1627	9.48821	0	0	6.84479	0	0	0	0	12.6103	0	7.68672	0	0	3.68223	0	0	0	0	0	11.4232	3.08598	6.53472	8.27294	18.2653	0	21.2562	14.2746	5.1957	0	6.51855	8.61134	10.0706	0	0	0	2.76265	2.65286	8.65088	9.336	9.54664	8.69725	3.46637	0	0	0	0	9.3606	0
0	0	0	3.5448	0	0	0	12.7398	0	0	0	0	0	0	0	0	8.69805	5.04136	0	0	7.32029	21.7975	6.00807	0	0	0	6.16746	0	0	0	18.3207	0	0	0	20.5685	9.51325	0	17.4811	0	8.32185	0	0	0	0	0	0	0	0	0	7.3724
0	0	0	0	0	0	0	0	0	0	0	0	0	0	0	0	0	0	0	0	0	0	0	0	0	0	0	0	0	0	0	0	0	0	4.56573	14.7478	46.6667	0	13.3437	0	0	0	0	6.64653	1.12763	5.68241	5.81877	0	0	0
0	0	33.3333	0	24.0861	0	26.8095	36.6637	0	0	0	0	0	62.1662	21.2918	0	0	0	13.0081	21.4626	13.2125	21.9102	23.8764	33.3333	31.4226	0	0	0	0	0	0	25.068	33.3333	33.3333	0	27.0646	33.3333	0	0	24.6825	46.2751	23.7867	28.7706	0	0	0	21.638	33.3333	0	0
74.7419	76.4986	57.1785	88.1714	44.3455	80.894	66.6667	21.911	88.6701	87.1388	87.3897	86.9683	70.4981	33.3333	66.6667	87.0011	91.3019	75.8055	55.2393	51.8195	54.5757	44.8692	57.4899	56.8018	42.1026	73.9937	90.4792	78.7438	82.5755	80.7216	81.6793	54.9519	47.2249	45.8891	46.0982	0	0	0	33.3333	0	33.3333	40.6534	62.5321	33.3333	0	0	33.3333	33.3333	39.9959	65.0808
0	0	0	0	0	0	0	0	0	0	0	0	0	0	0	0	0	0	0	0	0	0	0	0	0	0	0	0	0	0	0	0	0	0	28.7676	42.4056	0	21.0564	34.415	58.3448	0	0	0	56.5538	94.0464	90.8722	21.043	23.2294	0	0
0	0	0	0	0	0	0	0	0	0	0	0	0	0	12.0415	0	0	0	13.0267	0	0	0	0	0	0	0	0	0	0	0	0	0	0	0	0	0	8.17204	52.4811	0	0	0	0	0	0	0	0	0	0	23.8018	0
8.94145	0	2.69999	11.1111	0	0	0	26.0679	0	0	0	10.0591	33.1289	0	10.514	13.9961	0	6.93291	0	23.5829	0	4.57562	0	0	0	0	0	7.29491	0	0	3.48635	5.72829	0	0	0	0	8.95571	0	9.14798	0	0	5.54455	0	0	0	0	7.4231	0	0	24.7733
0	17.3618	13.7538	5.5446	4.12882	9.01626	0	0	29.2221	9.04059	0	3.88729	0	19.0509	10.6362	12.2633	0	18.9927	14.4693	9.58576	2.89887	17.1932	16.5211	21.1057	22.089	7.93362	25.8238	0	0	20.0941	0	4.77194	0	0	8.95833	4.47381	0	9.26172	0	0	18.3875	0	10.4963	0	0	0	16.1045	12.1655	13.1784	0
4.03775	22.9689	0	24.2445	0	0	0	16.1564	0	0	0	0	0	8.35987	0	0	0	23.0799	0	0	0	0	5.97438	0	0	8.86926	20.4972	0	33.3333	7.8563	9.84926	0	15.024	0	22.3844	0	11.2516	0	0	12.7395	7.93862	8.63318	0	0	10.0248	0	0	3.78788	9.82088	0
33.3333	14.5869	0	0	15.8142	27.3405	10.0831	0	21.154	20.533	41.9681	14.2078	16.5462	0	13.1963	0	37.6574	10.62	17.8579	10.6283	21.342	0	16.0813	0	33.3333	6.08879	0	0	6.8159	0	4.43056	3.20028	18.0489	0	0	0	0	0	10.3854	0	0	18.1818	7.1953	12.1855	0	0	7.49939	0	0	29.2361
0	0	11.2978	6.30937	2.47729	0	18.4851	0	13.1486	6.86168	0	3.74309	0	0	13.5886	0	0	0	9.78464	0	0	13.0979	0	10.3845	7.30968	0	0	0	0	0	0	6.12675	25.3253	18.2137	0	0	7.96976	9.06788	10.1943	4.57464	22.0412	5.18152	0	2.22873	0	6.82471	0	0	18.0358	0
0	15.9715	0	9.08882	0	16.226	0	0	17.3515	0	33.3333	0	10.1528	0	0	0	0	0	0	0	0	23.9742	11.0327	8.57038	18.6146	0	13.6798	0	0	19.7525	0	0	0	33.3333	0	0	0	0	0	47.0235	0	0	0	0	0	0	0	25.2189	0	0
24.3919	0	0	0	33.3333	0	33.3333	0	0	0	7.27259	9.4394	20.1905	0	32.3203	19.3373	0	0	0	0	63.7678	16.1401	0	33.3333	0	49.8638	0	33.3333	33.3333	19.0691	23.4841	0	5.22487	33.3333	0	0	0	5.44063	0	0	0	0	12.5184	37.2019	21.9899	35.4323	0	0	15.2975	13.623
0	29.1109	72.2484	22.2222	44.2463	20.7563	38.0985	57.7757	12.1794	63.5647	9.58766	0	0	72.5892	19.7448	16.6443	62.3426	30.121	10.2164	49.5235	0	15.6598	34.0642	12.7333	18.6533	0	30.1137	41.0726	9.99426	0	58.7498	80.1727	26.3175	0	68.6572	95.5262	55.4151	33.3333	70.2723	6.90361	25.3947	20.168	36.0211	33.3333	28.765	26.5086	17.2288	54.5011	0	0
29.2956	0	0	0	0	8.09109	0	0	6.94444	0	7.83832	0	0	0	0	33.3333	0	10.2535	39.0241	0	11.9914	9.35918	16.3262	0	0	0	9.88544	0	0	33.228	0	0	0	15.1196	0	0	0	0	0	28.7587	6.30962	0	0	0	0	0	22.5347	0	23.5125	18.4977
0	0	0	21.4794	0	18.5699	0	0	0	0	0	58.6633	19.9816	0	0	4.42577	0	0	8.64758	6.67958	0	0	0	13.8728	0	27.2445	0	18.2991	16.5232	0	0	0	10.0595	0	0	0	16.4079	42.8964	0	0	19.9284	42.2909	33.7689	15.0505	39.2203	31.2344	29.2095	4.3266	20.1549	13.8699
1.67909	39.7642	6.77074	27.0011	10.2293	17.1705	0	34.3568	0	0	0	0	28.3312	0	31.506	10.757	0	0	0	0	0	0	0	0	45.9453	5.59292	6.43108	0	13.3894	0	0	0	0	7.45736	32.5897	31.0487	0	14.7221	41.7183	0	5.22585	0	0	22.93	0	0	0	0	0	0
0	0	9.87479	0	0	17.948	11.2965	0	12.1657	31.4021	13.7409	0	0	11.4073	0	21.8978	20.5733	20.5131	0	21.0135	0	39.9104	0	11.6442	0	0	0	10.0259	0	14.7634	18.7277	19.73	11.6901	0	0	0	14.2135	0	0	44.2239	0	14.4768	0	12.1212	14.8539	22.6106	13.5804	38.2108	22.0922	19.5998
0	0	7.67989	0	0	0	25.5741	0	44.9159	0	19.6183	0	0	11.6953	0	0	0	22.7225	0	9.33472	7.46378	0	10.551	0	9.98254	23.6654	4.39522	24.1841	18.1669	0	44.4445	0	12.8197	23.5195	0	14.415	10.5444	33.3333	0	0	13.3561	35.8852	0	0	0	0	0	0	0	10.1785
0	16.2086	0	0	0	29.8433	0	17.8088	0	22.005	18.9257	50.0479	38.9334	0	0	25.515	0	0	42.6242	0	0	0	11.6817	26.3303	0	0	0	0	0	0	0	9.0248	0	6.34884	12.2541	0	0	8.40051	0	0	0	0	0	0	0	8.62069	0	0	0	12.0162
34.6751	15.2105	0	13.8305	15.0221	0	18.7178	0	0	13.6257	0	0	0	0	18.3686	0	0	5.89486	20.1716	6.73984	0	19.6731	0	0	0	27.7404	26.9023	17.1444	0	28.426	14.6056	16.3924	0	0	15.0659	3.22222	0	0	10.1112	0	33.3333	0	0	0	0	10.0488	0	33.3333	0	0
0	21.6696	0	8.04472	14.695	0	0	0	29.3067	0	0	33.3333	0	30.839	0	0	0	6.30241	7.91166	0	0	21.0412	0	2.56639	0	0	0	16.1899	10.856	0	0	11.8037	0	0	0	0	0	0	0	8.2941	28.1075	12.7763	13.0063	23.648	72.3899	0	27.122	0	23.3951	12.2421
33.3333	0	75.6746	12.9223	33.3333	15.3853	22.0369	0	0	0	28.1226	16.6188	12.1508	0	22.4163	0	79.4267	0	0	10.201	87.6228	19.3753	66.6352	18.0808	27.0668	26.3536	62.2714	0	19.9439	33.3333	0	8.35443	0	43.1472	0	51.3141	52.4532	33.3333	16.4228	45.3749	0	4.26117	33.3333	0	0	0	0	21.5517	33.3333	0
30.3125	0	0	0	18.3112	0	14.6155	0	0	8.24588	19.5924	0	0	0	12.7444	22.5763	0	0	0	17.5717	0	0	0	7.00305	13.0095	0	0	0	0	23.4772	14.0028	0	75.4901	19.5271	25.9844	0	22.7889	10.2107	0	0	0	20.6081	33.3333	33.3333	0	23.2845	53.0863	6.90416	0	23.1548
0	0	0	12.9128	8.40901	3.49005	7.75927	47.8345	0	11.3283	0	0	11.8185	23.2062	14.9647	11.4356	0	44.5672	29.2925	0	4.91346	0	0	19.1228	3.99588	16.6477	0	9.14927	22.0593	0	8.21936	29.4458	0	0	0	0	0	0	0	2.10715	19.9773	11.9924	20.327	7.96737	0	35.4353	0	0	11.2411	0
0	7.14718	0	25.2886	0	16.1628	0	0	13.6116	13.393	0	0	8.76613	22.8521	0	7.81834	0	0	0	35.1392	0	0	11.1321	15.2525	0	0	0	23.3064	15.5844	0	0	5.24895	0	0	14.1059	0	0	0	31.7477	0	0	0	0	0	12.7562	0	6.21132	0	9.93821	22.8085
3.56618	3.65932	7.12986	0	0	0	0	0	3.41059	0	4.52628	5.50433	14.1343	0	0	0	0	0	0	0	16.1092	0	4.92641	4.67577	0	0	0	0	0	0	9.98877	0	0	11.6264	0	0	0	8.97436	0	0	11.6171	11.0914	0	0	0	18.1489	0	20.9368	7.13607	0
8.84116	0	0	8.16265	17.5267	13.5587	12.324	0	0	0	26.423	12.2888	6.64953	0	15.1742	22.0884	21.0917	11.0841	9.34438	16.2338	0	44.0229	13.3635	11.6231	0	0	10.4455	0	0	7.03514	3.44536	5.74331	13.6391	0	0	16.1389	15.0247	0	0	17.5595	0	21.8809	0	0	0	0	10.5223	19.7615	0	13.4816
0	0	9.78367	13.4677	0	0	15.831	20.4669	0	0	0	0	0	11.0989	0	0	0	0	0	0	2.00962	0	13.0884	0	0	4.50717	10.0431	0	19.191	8.70466	0	10.5165	48.9714	0	12.7345	17.151	22.2304	15.2452	8.78363	0	44.8433	0	15.5215	25.5365	0	5.08652	33.3333	0	9.40117	0
0	2.92087	13.6876	0	0	0	0	0	7.53311	33.3333	0	0	0	0	0	7.1473	0	0	0	0	0	33.3333	0	17.5343	33.3333	0	0	11.8978	0	8.85127	4.73015	0	0	10.5661	33.3333	0	0	46.6631	0	0	21.7162	15.8278	0	0	0	0	0	0	33.3333	22.9992
0	3.5235	0	7.9643	10.5192	4.01946	0	0	33.3333	0	40.0051	30.346	33.3333	19.2515	42.8809	16.0616	12.093	0	0	33.3333	17.2241	0	27.9003	0	22.9676	13.3886	0	0	0	24.6287	0	0	9.24217	0	33.3333	0	25.5914	0	57.883	0	0	9.65497	12.3012	35.3734	100	0	12.639	0	21.8271	33.3333
18.6807	0	7.83016	29.6566	0	0	21.0094	23.1281	7.98817	33.3333	21.4156	0	0	8.69132	27.1166	0	0	6.88682	28.8697	33.3333	0	22.6438	20.2449	21.7102	17.4245	9.62484	31.2945	33.3333	57.0138	0	11.2777	66.3838	0	21.707	0	50.5278	0	0	33.3333	82.4405	21.8234	0	51.1451	0	0	48.5178	17.5704	33.3333	0	8.29215
0	0	5.80943	0	15.7907	59.0219	22.6806	33.6321	0	0	0	0	19.199	0	14.8283	54.7027	0	0	0	17.0996	0	0	0	0	0	0	0	54.7688	0	4.34522	0	0	0	0	20.5989	16.1824	0	18.0881	0	0	0	0	0	7.79685	0	0	0	0	0	10.3342
0	0	0	0	8.59967	0	0	0	0	33.3333	7.63006	9.76228	26.6838	0	0	0	0	0	0	0	0	0	0	0	10.3658	0	0	0	0	4.86523	0	0	8.45305	33.3333	0	0	8.53303	11.0292	0	0	0	24.0395	21.0321	31.2932	0	0	0	12.3965	0	0
0	31.0523	0	25.369	0	23.3999	11.9871	0	21.9346	0	0	27.829	0	13.5431	0	0	66.8153	33.3333	21.3433	0	31.3237	0	20.4764	0	0	0	48.2169	0	0	0	0	0	0	22.7673	0	0	0	0	0	0	0	0	0	0	0	0	20.6943	13.5719	28.3023	0
68.9119	58.844	55.7593	15.3797	47.5637	0	16.1679	22.7729	25.8002	0	0	14.2696	0	47.4152	0	0	0	48.6958	40.4426	0	33.3333	0	0	44.4566	15.9089	72.4793	0	0	23.7952	41.5698	70.558	17.3563	19.6942	0	0	0	28.6205	0	0	0	0	17.5055	0	0	0	28.2468	5.24069	0	0	11.5596
0	0	0	0	22.296	41.776	0	33.2698	16.5186	63.0434	78.5025	27.6699	86.8335	0	63.3973	69.8605	0	0	0	72.2233	10.0894	66.9143	46.2194	21.8403	55.0081	0	17.5268	74.6542	49.9513	24.0649	0	37.294	46.6143	48.4895	69.5084	84.5737	23.7831	43.1617	76.3451	83.5434	73.9069	24.499	68.0255	85.4066	75.3872	60.2655	31.2648	15.0321	25.0722	33.5905
0	33.3333	0	50.9256	0	12.9663	56.9592	0	23.7887	0	0	24.7144	0	19.5045	0	0	73.0582	33.3333	0	0	17.895	0	0	0	0	0	25.8747	0	0	0	0	0	0	25.9887	0	0	0	0	0	0	0	0	0	0	0	0	0	30.1061	6.28579	0
0	11.8386	0	10.9439	0	0	0	0	0	0	0	0	0	0	0	0	0	0	0	0	0	0	0	0	33.3333	0	0	0	0	10.2901	0	14.8293	17.6623	0	0	0	0	33.3333	0	0	0	0	0	0	0	0	0	0	33.3333	20.0402
0	0	7.98309	0	0	0	0	0	0	0	0	0	0	20.7126	0	6.51659	0	0	0	0	9.40826	0	0	0	0	41.901	7.29891	0	0	0	0	0	0	0	0	0	66.6667	9.2811	0	0	0	21.9562	0	7.49064	0	2.8297	0	18.3012	0	0
66.6667	15.0698	14.5685	0	0	0	15.6567	50	10.1218	0	2.61338	0	6.89541	0	4.14038	8.28264	0	14.3216	33.3333	0	10.6776	3.02378	0	0	3.1896	0	0	2.8383	6.81434	3.16136	33.3333	6.98795	8.37316	0	20.8231	9.74799	0	0	0	9.39698	8.41507	0	19.5253	0	0	0	0	7.48638	8.26115	0
33.3333	0	19.4229	0	0	8.27552	3.90266	0	0	10.9988	0	5.6634	0	0	0	0	0	33.3333	14.4815	0	0	11.7593	0	23.7174	0	0	8.63642	7.38241	0	23.0432	0	5.98893	6.06441	0	0	0	9.55027	0	2.4608	4.92025	0	0	0	0	12.2462	0	23.9542	18.9225	0	13.036
0	7.97152	12.1292	0	28.6282	14.7603	0	0	0	0	10.051	33.3333	0	47.1621	5.84795	3.39652	26.9418	0	0	0	0	0	0	39.5064	0	14.1667	19.38	4.20409	0	33.3333	33.3333	3.37439	0	0	2.80711	0	0	14.2238	13.6021	0	0	33.1396	0	0	0	33.3333	0	0	0	33.3333
0	0	0	10.9182	0	0	17.6766	16.7302	9.54466	0	0	8.61893	0	12.6207	4.3276	0	0	0	18.8519	27.7767	0	0	53.7806	0	0.499032	24.7657	0	0	43.2344	6.10704	0	0	4.17858	4.70788	0	5.67835	0	0	0	2.13938	0	0	6.58738	7.10273	6.05884	3.57143	2.06853	0	0	0
0	0	13.9105	10.0901	0	10.1304	0	0	40.0263	16.8141	0	0	6.2711	0	11.7968	11.9438	0	0	0	0	0	0	0	9.6159	7.96996	0	0	0	0	0	0	16.3958	5.61481	7.34463	0	0	0	0	0	0	6.4963	20.4052	0	0	0	0	33.3333	0	0	0
0	31.7868	31.9858	17.1222	15.7425	12.0915	5.8048	0	0	9.14372	8.83311	0	0	0	10.49	0	0	19.0117	0	0	51.9298	18.3026	0	5.31993	0	19.1667	21.2832	10.921	0	0	0	15.1297	11.4924	13.4693	6.86143	0	0	0	7.59199	0	11.1818	0	5.86179	0	6.30768	0	9.3791	10.1516	27.0475	0
30.0734	0	0	0	0	0	28.8984	39.116	0	11.5077	15.2545	9.45226	20.0751	17.3184	0	0	0	0	27.0717	0	0	0	0	12.7489	13.4135	27.1402	0	14.5912	15.7747	2.35429	6.58342	0	9.90076	0	19.102	9.30762	47.1889	11.4274	0	6.57928	0	0	0	27.8042	8.04122	13.0235	0	0	0	27.3302
0	7.64365	0	0	30.6591	0	0	0	0	0	0	0	4.87543	0	0	0	62.8785	6.94338	0	0	0	0	15.9736	4.99168	7.47018	0	0	0	0	0	6.92666	0	0	0	6.96308	0	0	0	5.92902	11.9554	0	23.4523	0	0	0	0	0	44.1129	10.8768	18.1943
21.5876	0	0	9.66891	5.05991	35.9035	0	0	0	0	0	0	0	16.6371	16.5354	11.5881	0	0	0	21.9263	0	0	0	0	0	0	26.4459	0	20.1368	8.03091	0	0	19.9613	0	0	0	12.5306	8.15025	0	0	4.63096	33.3333	10.9481	0	23.8121	0	8.83315	0	0	0
0	0	65.6617	44.5826	20.0075	17.2949	33.3333	0	34.6366	0	21.4904	35.4271	33.8707	0	43.9376	21.0189	0	33.3333	19.1832	30.5557	72.0457	58.1522	20.6817	8.96943	26.3268	21.0615	0	4.68607	13.0621	20.2926	18.0566	8.60112	0	90.9057	0	62.461	14.5607	12.1224	0	15.8997	10.7556	0	33.3333	7.47524	0	5.87351	39.8618	20.8075	34.1575	8.31934
15.9814	50.3826	0	0	0	0	3.49566	0	20.418	24.8603	18.0788	0	0	25.2115	0	33.3333	0	42.2756	30.2121	0	0	16.8451	22.3056	33.3333	13.8104	27.4405	52.2572	18.7421	28.7305	18.3889	48.5127	18.2565	56.7659	0	0	0	0	9.07034	46.85	0	22.3725	8.0061	0	18.9362	38.5032	0	0	0	0	0
12.9832	0	0	0	13.3259	0	0	21.955	0	33.3333	0	0	0	0	0	0	19.7228	0	0	0	0	0	28.3875	0	0	6.19318	0	55.8233	13.1966	25.3024	0	32.0992	0	0	37.6284	0	0	0	0	17.0162	0	17.042	22.3852	17.6267	0	33.3333	0	0	22.4565	17.5248
4.90973	0	18.0045	45.7485	0	23.6322	28.0665	35.5619	14.5304	11.687	16.523	32.6295	41.1787	16.6962	22.729	16.1729	0	0	0	35.6574	0	0	0	39.9567	15.7726	0	0	0	0	13.0407	0	0	13.372	0	0	17.5712	25.7198	21.8818	0	37.0554	24.1287	0	27.4712	0	9.52122	25.0118	37.1813	25.1044	0	28.6314
0	25.0835	0	0	0	0	0	0	17.4997	0	0	0	0	24.1368	0	0	0	17.4477	0	0	0	25.0027	0	0	12.0527	0	0	0	0	12.5901	0	15.7984	0	0	0	0	0	18.5635	0	0	10.9608	0	0	19.9839	0	22.7579	0	9.97512	0	0
7.62858	0	0	0	30.9476	0	0	0	12.9153	10.1385	15.2545	14.255	0	0	16.7979	0	0	0	14.1501	0	6.10156	0	12.6516	0	0	12.2719	14.4094	0	4.49656	0	11.2273	15.0768	0	9.0943	36.3065	5.1292	0	0	47.2209	9.73783	0	0	0	4.26434	7.82107	0	14.1237	0	0	0
6.836	16.8902	16.3338	0	0	23.1694	6.20612	3.36712	0	8.47308	13.3987	8.23619	0	0	0	17.8868	17.3987	0	9.38285	11.8605	21.8528	0	0	0	11.1538	5.89279	6.88738	6.1573	4.60279	0	8.69336	10.1679	0	0	0	5.531	0	18.7843	0	1.75616	27.1514	18.1663	5.86213	3.90941	12.3012	0	0	0	32.5092	0
6.53659	0	6.00453	14.9428	0	0	0	0	11.2725	0	0	5.578	14.8233	22.393	29.231	0	0	17.1753	0	12.313	0	7.65319	0	7.86552	0	8.64487	0	7.85403	20.1742	20.1262	0	0	0	0	0	0	30.8501	0	0	0	0	9.17915	0	0	0	10.805	23.0368	10.9615	25.1313	0
0	0	0	0	14.3364	0	0	0	0	0	0	0	0	0	0	23.6131	0	0	0	0	13.6897	0	19.5862	12.643	0	0	20.0075	0	0	4.46476	0	0	31.3886	13.0564	9.90483	0	0	0	0	0	0	22.5239	6.20127	0	0	0	10.5806	0	0	0
6.90615	33.3333	0	17.3068	0	0	38.4936	0	10.7147	0	19.8283	15.8885	0	0	0	0	0	11.6712	13.7438	7.55793	0	0	0	21.2776	13.2005	14.8811	0	0	22.966	0	11.3042	10.825	19.8825	14.5421	17.2254	0	0	13.6486	0	21.9383	9.20502	0	0	7.96257	0	18.669	25.1328	32.7263	4.27958	0
8.69618	10.83	60.6621	0	37.2658	11.3703	15.6971	53.0001	15.1447	54.45	0	27.2751	40.1688	16.8885	7.7555	33.3333	17.8285	15.4321	18.4037	0	0	84.8416	11.2899	25.4678	38.0132	18.4539	0	46.0535	0	12.6398	46.8384	0	0	0	0	66.6667	49.6111	0	44.7257	39.8141	22.3046	16.0211	42.511	43.564	36.2778	15.0433	0	0	0	51.7943
0	18.9112	0	0	0	25.2833	0	0	0	0	35.4335	0	0	17.6901	15.6059	13.4875	0	8.78457	0	20.2457	15.8305	0	12.3647	0	0	0	0	0	24.9999	19.1084	0	0	0	53.6103	33.3333	27.7012	0	50.8378	0	0	19.71	33.3333	16.6428	0	24.0806	10.7562	0	0	14.86	0
37.1638	0	25.1193	33.2897	22.6337	13.6531	0	0	0	0	0	0	7.835	0	0	0	0	0	48.2629	27.4169	40.2579	0	0	0	20.1329	0	10.2675	0	0	0	0	27.6274	19.3082	0	0	0	0	0	33.3333	11.395	0	0	0	0	0	7.30271	22.7527	0	0	0
12.4156	0	0	10.3789	0	33.3333	0	13.3408	22.6186	28.0771	5.64898	17.4448	0	11.5793	7.23045	0	0	17.9012	19.5896	0	0	0	42.1229	20.6904	0	43.1407	12.9559	42.25	0	28.8686	22.0291	13.6833	5.7265	18.7912	0	0	5.18135	0	0	20.6663	14.4212	10.8094	0	27.7554	6.76864	12.5857	10.2966	12.3135	10.1673	23.4404
0	22.5034	0	0	0	0	12.46	26.8895	33.3333	15.0936	18.1914	24.5748	21.6747	10.1959	16.1486	19.8459	82.1715	15.399	0	0	17.5029	0	0	12.0558	28.6535	0	21.5295	0	0	8.85425	0	0	0	0	0	0	0	35.5136	9.8838	0	0	0	0	0	0	0	0	0	22.3958	16.386
16.0601	0	8.21405	16.0702	15.0645	8.05003	33.3493	0	6.91613	0	20.8978	0	0	15.6433	24.0286	0	0	0	0	13.7247	0	7.50524	0	0	0	0	23.0659	0	21.4925	0	19.8283	34.5638	23.6942	0	39.5365	5.63209	0	0	0	0	11.0288	0	10.4893	6.66433	14.0387	11.7722	0	0	0	0
12.2215	14.4221	0	8.01166	10.6996	8.30993	0	6.76958	0	2.37935	0	9.23878	15.4981	5.61004	0	9.72022	0	13.6367	0	18.7418	12.7191	0	14.6362	0	0	14.8794	12.1737	3.84244	10.3673	5.93797	0	13.3005	0	0	0	0	14.3574	0	12.0572	6.18632	23.3305	8.13307	24.1557	14.0537	18.8343	13.0659	8.20053	43.9987	23.166	8.37923
0	4.28359	6.51528	0	0	0	0	0	8.42462	0	13.3969	3.40885	0	3.66687	0	0	0	10.1962	9.17204	0	0	14.3271	5.6374	3.12043	4.12938	0	3.08272	0	0	0	0	0	0	0	0	5.86705	0	0	5.48764	0	0	17.8146	0	0	0	0	0	0	0	0
0	0	0	0	19.4822	0	0	0	0	0	0	0	0	0	0	10.8023	6.34531	0	0	0	0	0	0	0	0	0	0	0	13.2577	0	0	0	0	0	3.82069	0	5.41981	43.2103	0	0	0	19.9939	0	0	0	0	0	0	0	18.4564
0	0	8.88113	0	0	0	8.06577	0	0	0	0	0	0	0	0	0	0	0	0	0	0	0	0	0	16.7542	0	0	0	0	0	0	0	0	0	0	0	0	0	0	7.36398	0	0	0	0	0	0	0	0	0	0
0	0	0	0	33.3333	0	0	85.6901	0	52.2693	0	23.3428	0	21.1429	0	0	0	0	17.9272	24.6899	0	0	27.6959	0	26.5581	0	0	0	16.8456	0	0	0	21.459	0	15.812	0	45.6874	0	0	0	0	0	33.3333	33.3333	0	0	16.5496	20.6463	0	0
94.1634	95.7164	84.6036	100	47.1845	85.7744	78.7343	0	79.367	24.9779	86.6031	66.6667	86.7448	33.3333	88.2098	89.1977	46.2389	73.3783	54.3062	46.6894	86.2786	25	66.6667	52.3221	45.7831	100	96.9173	85.1673	53.409	90.9855	91.1201	84.8086	55.5651	95.5965	16.0643	0	0	0	0	33.3333	77.4336	18.1384	66.6667	56.6851	59.186	66.6667	66.6667	14.9267	11.9138	48.2103
0	0	0	0	0	0	0	0	0	0	0	0	0	0	0	0	0	0	0	0	0	49.6005	0	25.969	0	0	0	0	0	0	0	0	0	0	33.3333	94.133	27.9135	54.3707	66.6667	59.3027	0	33.3333	0	0	33.3333	33.3333	0	0	0	0
0	0	0	0	0	0	0	0	0	14.3974	0	0	0	29.6665	0	0	0	0	0	8.64341	0	0	0	0	0	0	0	0	16.4877	0	0	0	0	0	0	0	0	2.41898	27.8457	0	0	0	0	0	0	0	0	10.1736	66.6667	28.9658
0	0	0	0	0	14.2256	13.1999	0	0	0	0	0	13.2552	0	11.7902	0	0	7.95804	0	19.9773	0	0	0	11.2242	0	0	0	0	0	0	0	7.13836	8.17301	0	0	0	0	0	0	0	0	0	0	9.98153	0	0	0	0	0	0
0	0	0	0	0	0	0	0	0	0	0	0	0	12.1905	0	0	0	0	6.23412	0	0	0	0	0	0	0	0	0	0	0	0	0	11.8744	4.4035	0	0	0	0	0	0	0	10.7198	0	0	7.48063	0	16.7837	15.2666	0	0
5.83663	0	0	0	0	0	0	14.3099	12.2084	8.35546	0	6.58171	0	0	0	0	47.4158	8.46739	12.3604	0	13.7214	11.0724	0	7.36434	6.77526	0	0	14.8327	0	9.01447	8.87986	8.05304	2.92851	0	30.9698	0	20.9793	0	0	0	22.5664	0	0	0	0	0	0	38.9868	21.4195	4.36748
13.4184	47.7191	29.4839	14.3877	34.8863	22.9984	41.7479	33.7355	8.89261	44.1605	7.076	14.8396	48.579	44.3741	25.6954	19.0454	0	0	0	9.39836	23.7	56.0244	13.6051	35.5652	29.7712	37.6558	3.00677	47.0353	18.1874	0	29.7176	16.3584	0	11.2916	13.8725	50.6425	38.7733	56.053	48.6665	55.987	0	0	63.3746	30.0372	0	21.1801	22.446	0	0	20.9794
0	0	0	19.9371	20.5795	33.3333	0	0	23.308	0	0	0	0	0	0	20.3658	0	0	10.3109	0	0	0	7.97324	0	0	0	36.6422	0	0	34.6283	22.5427	0	9.42437	0	0	0	0	0	0	0	33.3333	36.4812	0	0	18.4206	49.8793	0	2.54037	12.9919	23.2006
34.1406	0	14.3195	21.2699	0	0	15.1892	0	0	0	10.2932	25.9645	0	0	0	0	0	16.4283	13.9457	17.8014	0	24.9182	16.9102	0	0	0	0	0	24.2454	0	0	29.2824	33.3333	0	0	20.1157	13.6324	0	0	11.3617	0	0	0	33.0495	0	0	32.8889	0	21.4495	10.7819
0	11.7689	6.84608	0	0	0	0	35.3899	7.98662	33.3333	40.7758	0	0	0	0	0	0	17.3759	0	0	38.1738	0	0	12.197	0	0	11.828	0	0	0	17.0808	0	16.1181	0	13.4486	0	0	0	32.7018	0	0	0	0	0	24.5483	0	0	60.8376	0	0
4.81581	4.6452	10.0278	12.1737	0	6.43365	0	0	0	6.55405	23.0401	0	11.7151	19.587	38.8265	10.1474	84.2152	0	12.5993	46.1821	0	0	19.7282	19.8185	36.4889	15.2564	0	0	6.09012	0	0	0	0	33.3333	0	0	0	0	18.6317	0	24.0106	0	0	0	0	12.1532	0	0	31.5012	0
0	13.616	6.43345	12.0634	12.7539	0	8.21892	0	14.8491	0	0	20.4636	32.3125	10.5863	10.0304	14.8831	0	33.3333	52.7209	15.532	0	3.14802	6.70012	0	0	33.3333	30.0245	9.08535	28.3243	52.4125	0	54.3592	13.4074	39.603	0	7.02738	14.2609	0	0	0	22.8567	29.3333	0	0	38.5721	4.5632	3.63349	0	11.8838	12.354
0	15.7674	0	0	0	11.9583	0	18.865	7.58241	0	8.59269	25.8626	0	0	0	0	0	32.8625	0	0	0	0	16.4231	21.1364	18.7436	4.62203	0	33.3333	0	12.9592	16.2525	0	0	0	48.2057	3.91317	33.3333	0	0	13.0042	0	0	19.5869	0	8.785	0	16.4034	0	0	10.1327
32.5261	0	11.7429	13.3962	19.9191	19.5751	18.1441	0	0	15.9521	0	0	0	13.7463	0	0	0	0	10.4231	11.0862	38.1262	15.9093	0	0	0	0	0	0	23.1528	0	10.7907	0	0	0	24.4732	0	0	7.36624	0	19.647	0	21.524	8.88135	21.844	9.67393	0	17.3744	5.89091	0	0
0	6.48344	0	6.77185	11.8613	0	16.6998	12.0096	28.5095	0	0	12.8697	2.73272	11.7062	13.5538	35.5582	15.7848	0	0	0	0	0	0	4.53863	14.9963	9.13251	0	0	0	0	3.61575	0	17.2152	7.86129	0	0	0	23.8205	0	0	10.4767	0	0	15.0693	0	12.2242	7.25382	0	16.3933	0
15.0991	0	21.1464	0	0	5.70126	0	0	8.8717	0	10.2221	0	4.6606	0	11.8939	0	0	0	0	0	0	0	18.66	6.74437	0	0	18.4986	10.5461	0	0	0	0	10.5016	7.91081	0	18.3013	0	12.7602	0	0	9.32275	12.6615	8.15716	0	0	0	0	30.7312	5.78029	22.5514
6.88398	7.66853	0	0	28.1091	18.369	0	0	0	0	21.1852	0	0	14.0989	0	0	0	0	0	2.14399	0	14.7682	0	0	10.9479	0	0	0	0	21.1498	0	4.99299	0	19.6566	0	12.2599	0	9.3258	36.3854	0	0	5.5596	0	0	0	25.1131	0	3.364	24.3274	0
0	0	0	0	14.0203	0	0	17.9466	0	0	14.8427	9.80769	0	9.66256	38.3076	18.3676	53.8144	18.2768	8.33333	38.336	22.2335	10.1353	35.4317	16.5884	26.9955	20.2671	0	0	9.985	0	0	0	0	9.55068	7.8702	10.1483	26.2625	0	20.2754	16.7359	0	20.6247	9.82119	0	23.9395	3.86366	16.9097	0	10.6758	0
25.1052	9.62591	80.0977	29.6784	0	15.7245	11.7355	0	33.3333	66.0753	22.4962	0	31.168	0	8.2788	7.13256	0	33.3333	6.48021	0	33.3333	0	0	33.3333	0	22.5741	33.3333	20.7818	0	33.3333	37.5637	15.9885	32.1209	15.9491	0	0	29.7932	0	0	0	13.9014	13.6424	27.1235	17.7112	23.7522	8.28346	10.5112	0	0	26.9601
21.6763	10.4324	0	0	19.5081	12.9834	15.1417	24.747	33.3333	0	1.99806	20.7285	13.4682	22.5436	0	0	0	33.3333	41.6387	19.8169	0	0	13.2373	22.5597	0	17.5037	16.9166	0	33.3333	22.4764	22.3059	0	30.6609	6.43955	0	36.2412	0	17.9846	8.09367	33.3333	0	2.74338	0	33.3333	6.52332	0	0	7.20721	0	0
0	18.1446	0	33.3333	0	11.4396	20.0408	13.5021	33.3333	0	0	31.1847	0	19.2345	0	11.4455	18.067	15.0565	0	4.95912	9.42863	29.5549	19.0499	0	9.11547	0	7.90806	17.1963	10.1487	4.90098	0	0	0	9.1745	33.3333	18.3345	12.6397	33.3333	19.8774	27.1449	3.26954	0	16.9404	33.3333	0	19.5598	0	0	14.545	0
0	16.4277	0	17.7468	27.9688	0	3.67909	0	0	0	7.06605	0	19.8651	23.6708	53.4136	26.2008	0	0	10.3461	0	9.12595	0	12.1851	0	0	0	16.4168	33.3333	0	0	0	11.7335	5.73109	0	0	0	12.2754	0	0	0	28.5378	0	23.5121	0	0	0	0	0	0	6.12846
19.0747	0	12.3812	19.2414	0	0	0	0	0	8.97125	0	12.6048	0	10.7897	0	12.1238	28.1186	0	16.6946	0	0	0	0	16.745	25.2173	0	0	12.5515	33.3333	0	13.2903	36.3557	14.4361	0	0	2.98444	0	24.0075	0	6.41914	24.2274	26.2833	0	0	36.2039	21.1232	48.7818	22.7621	10.8274	52.5528
27.2598	0	7.52113	0	0	23.8746	18.1917	0	0	0	20.2637	17.0765	25.6446	0	0	0	0	0	0	4.59552	0	33.6447	20.096	10.7737	27.7238	10.7592	25.4253	0	0	0	26.8401	0	2.67248	39.2296	33.3333	14.9989	0	15.3487	9.62867	0	30.0638	25.0303	6.20982	8.06452	0	0	0	66.6667	9.00591	0
0	19.786	0	0	10.3937	17.6088	13.2925	18.5513	0	0	12.1481	0	9.85413	0	0	14.9657	0	0	0	11.3725	16.8627	0	0	0	0	0	0	0	13.1997	18.1395	0	0	7.43904	0	0	0	0	0	2.31023	6.1884	0	0	16.3929	0	9.58117	12.147	0	0	18.7883	0
0	17.9149	0	0	0	0	17.9188	25.253	0	24.9535	0	8.59776	0	0	0	9.76402	0	0	16.5071	18.776	9.01583	11.8969	0	0	0	28.8959	0	16.137	0	0	0	30.9293	6.93953	0	25.4631	5.03282	19.0292	0	3.42923	10.1783	0	6.11633	0	7.5576	0	9.90991	23.7974	0	11.8301	14.3587
5.60063	0	7.15178	25.7935	0	8.67397	0	0	0	0	0	21.1309	13.3824	7.96559	0	0	0	13.2785	0	0	21.702	0	24.4489	0	0	0	9.3192	0	18.8086	18.8136	7.35898	12.948	15.2385	0	0	13.8381	19.367	0	11.9927	15.8959	12.5482	14.5909	0	0	0	0	0	20.8588	0	5.64041
9.93551	6.27113	6.42234	0	27.5544	0	19.9869	0	24.9526	22.2258	21.0958	0	0	0	31.9172	12.541	0	0	0	7.1989	0	0	0	24.0591	0	0	12.5349	31.9721	0	24.8291	0	0	0	17.6206	0	0	0	0	22.4799	0	19.0614	0	9.87691	27.2369	0	0	7.98339	0	47.1581	4.21261
25.0617	0	33.3333	15.4741	20.5151	0	0	0	23.4551	0	26.538	13.6486	39.7737	5.78197	5.69866	0	20.591	14.5304	26.975	14.8208	10.7312	24.5452	13.6327	15.1288	27.0302	26.751	15.1821	0	26.8934	13.9614	8.50767	0	20.6435	0	25.9391	0	20.7371	0	0	15.5011	16.1562	0	0	8.49365	28.2979	0	0	0	18.7674	0
0	0	0	0	0	0	0	0	0	33.6052	0	14.8785	0	16.6901	0	20.3125	0	13.1217	26.4232	0	28.8938	17.8188	0	0	0	0	0	0	0	0	0	11.7332	15.2836	0	0	6.70476	0	12.2404	0	0	0	15.5535	19.6272	0	12.9857	31.9517	13.6005	33.3333	0	0
0	33.3333	0	0	0	17.5534	17.8725	0	0	0	0	0	0	25.3677	6.35325	0	50.1765	0	0	0	22.6021	0	0	0	0	0	0	0	0	0	13.7727	0	0	0	0	5.50649	33.3333	15.8204	10.6953	0	14.2719	7.53865	13.3509	0	0	0	0	0	0	30.7437
36.0043	20.3411	0	0	0	57.9927	46.6797	0	9.87828	11.1075	23.9274	31.8872	12.5246	0	15.1943	33.3333	0	0	0	18.5126	0	0	19.7006	0	33.3333	33.3333	0	49.967	8.40857	23.024	33.3333	0	27.9216	66.0186	0	0	8.51455	33.3333	0	17.8322	0	0	0	23.4328	0	0	45.0828	21.7065	14.5659	0
0	27.0622	26.911	34.3959	39.1122	0	0	50	17.1352	3.89726	12.2376	18.4548	14.3684	0	15.3333	0	0	39.0145	0	26.1344	16.0709	42.1215	20.7712	26.7012	17.1515	25.3318	54.8753	18.0609	20.5146	19.372	25.9744	29.9721	0	0	0	33.3333	0	21.093	10.8534	19.0951	37.9623	33.3333	33.6886	0	0	0	33.3333	24.1014	0	23.5665
23.3978	0	26.1816	24.3364	0	0	15.4609	50	24.5789	17.2603	0	0	19.9509	44.1946	13.0629	33.8132	0	20.0548	0	0	0	0	0	18.2046	22.4849	14.5838	0	0	19.2587	0	11.053	0	0	0	52.2654	12.7905	12.5962	17.513	21.3406	17.4374	0	17.7798	23.4564	24.8397	58.7163	0	0	0	0	18.8578
0	12.9922	0	0	0	15.7799	0	0	0	11.904	16.2013	0	0	0	12.4404	0	29.2325	0	46.6018	0	0	15.5145	21.4465	15.9063	0	0	8.0885	0	6.11613	0	0	45.3467	20.9128	16.3607	21.7955	27.8268	0	0	22.638	14.2383	0	11.2038	0	15.9969	0	68.0483	0	0	19.5086	12.8525
0	0	0	0	12.8182	0	0	0	0	0	0	0	0	0	0	0	0	0	0	0	0	0	0	0	0	0	0	0	0	0	0	0	0	0	0	0	5.45176	0	0	0	0	0	0	0	0	0	0	0	0	4.12647
0	0	0	0	26.4636	0	27.8741	0	0	21.9324	0	17.6433	19.0334	18.2348	29.2773	29.3186	0	0	13.129	20.1983	0	0	17.0961	0	19.3994	0	7.70716	17.5266	0	0	0	14.7849	5.44891	0	0	0	0	0	0	0	28.0187	0	0	0	0	0	0	42.095	0	27.7306
80.2492	83.3766	79.1753	88.8728	42.7123	47.6968	24.0086	0	50.5571	44.5406	82.703	56.824	52.2671	42.1272	18.4777	38.2019	85.1606	83.1327	13.4707	30.85	85.5313	96.747	51.671	43.7786	39.4751	84.5665	38.0467	60.9591	17.8867	78.0971	78.1001	42.4499	36.1506	51.9673	0	0	38.1871	0	0	21.8393	16.9759	12.4289	50.0547	0	0	0	38.5638	14.2616	21.6026	0
0	0	0	0	0	0	0	0	0	0	0	0	0	0	0	0	0	0	6.70895	0	0	0	0	30.0872	0	0	0	0	38.4968	0	0	0	0	0	65.609	83.4445	24.3374	69.4544	82.0336	36.5549	0	38.8181	0	81.8622	71.9051	67.6801	21.1362	0	28.644	0
0	0	0	0	0	21.7949	0	63.6899	7.60773	0	0	0	8.6722	15.0985	18.8335	0	0	0	0	23.8803	0	0	0	0	0	0	10.7758	15.8067	0	0	0	8.91129	18.7438	0	0	0	0	0	0	0	33.3333	0	27.0833	0	0	0	0	6.21685	0	53.7903
0	0	0	0	9.47764	11.2015	0	0	10.2907	9.86758	0	2.85401	0	0	0	7.94737	0	10.4717	19.8627	0	0	0	19.0092	17.4408	13.9339	0	11.9918	0	0	0	0	0	12.3742	31.5507	0	0	0	0	0	0	0	20.9045	0	0	0	0	13.5329	1.89951	19.2193	0
0	0	10.3344	6.14077	7.69665	0	18.1049	36.3101	0	0	10.6776	4.25072	0	16.3234	0	5.10212	0	6.39562	20.7582	2.48332	8.83893	0	0	0	0	0	0	0	15.4466	11.9747	0	0	0	0	5.6559	0	8.28719	23.9075	0	0	0	13.8135	5.03428	0	0	0	14.5699	0	0	5.60272
14.7133	4.86866	0	0	6.86976	0	0	0	4.97748	0	0	0	14.3995	0	6.66553	0	14.8394	0	0	0	0	0	12.2238	5.44724	13.0949	9.99787	7.97976	0	0	2.57378	0	4.10645	0	0	7.34568	0	8.99589	1.22175	8.62436	4.82671	11.7408	0	6.25	0	0	6.15059	0	9.36073	4.68931	0
0	7.11999	0	4.98644	0	1.66696	0	0	17.2528	23.6594	0	11.4393	5.62771	0	0	11.5679	0	0	11.1868	0	0	0	0	3.24611	0	5.43567	23.4987	5.70754	28.1698	0	5.45425	24.9757	0	5.01232	21.3894	12.6977	4.04255	0	0	0	0	0	6.38272	18.1378	4.80114	4.25651	0	0	25.8447	0
0	4.63479	10.4903	0	6.78011	0	20.6877	0	2.6171	0	0	6.98866	0	8.21611	26.7459	0	0	0	0	0	5.62981	3.25303	0	0	0	0	0	0	0	0	0	0	18.7604	11.4697	0	0	16.1499	0	9.34205	11.494	0	0	0	0	0	0	12.1971	0	0	12.8764
5.03747	0	0	0	0	17.6399	9.3247	0	6.69708	0	6.61939	0	0	0	0	7.86216	0	0	14.8837	22.5881	0	0	0	0	14.0967	0	0	0	0	7.35441	16.4456	4.77174	8.52205	0	0	3.85778	0	5.41641	0	25.2851	9.93127	14.0351	5.19494	0	23.2938	21.9128	0	26.1663	0	0
8.02506	14.9532	42.4954	6.34526	35.3386	17.2789	0	34.1485	0	6.45277	0	0	35.2975	0	6.61482	5.03668	0	4.59397	0	11.963	11.9391	26.6751	12.1537	7.4475	0	18.7372	0	11.7345	0	21.9108	19.4996	18.2699	0	10.8584	32.8805	4.52848	0	12.0035	9.70861	0	0	0	6.26329	24.6711	4.61501	0	12.6009	10.8997	0	33.3333
0	7.36961	0	19.8141	15.6286	0	3.31232	0	0	12.2538	20.2842	33.3333	0	26.6515	18.4416	14.0759	13.0449	33.3442	5.42113	0	23.9948	1.4753	0	0	13.4372	33.8303	40.8055	0	30.4489	0	0	0	0	9.20785	0	0	38.6174	0	10.3876	0	21.2146	33.3333	0	0	0	10.0102	17.9578	0	22.2498	31.9181
32.9468	5.27426	0	0	0	14.6651	17.9324	9.03812	16.0554	0	17.1948	0	6.95132	15.27	0	8.7249	0	0	15.372	0	0	0	16.9902	13.1669	20.0388	0	0	24.6025	11.9403	0	0	17.004	9.23525	0	13.9601	3.74982	0	0	18.4597	12.0661	0	0	33.1324	0	0	0	0	0	0	0
0	0	0	15.1136	0	0	2.16352	0	10.4942	6.14413	0	43.9804	0	0	6.92906	0	0	0	0	7.44563	0	3.58159	6.92204	0	0	0	11.0814	0	0	33.3333	0	11.1791	33.3333	4.82672	0	2.65664	0	0	0	35.3288	33.3333	17.8623	7.335	30.3114	0	0	0	15.0803	33.3333	0
0	0	6.12985	0	0	0	8.66958	6.38077	0	0	33.3333	0	0	0	0	8.87195	0	9.05959	12.4171	10.8646	11.2566	2.45719	0	0	0	0	0	0	0	4.10555	0	0	17.7244	4.14209	0	0	0	47.3384	0	0	0	0	0	0	6.12906	0	7.07763	0	12.4782	15.8109
8.74337	3.71558	0	0	0	0	5.82003	0	0	7.41977	0	0	0	0	16.4185	9.56456	0	0	0	0	0	0	11.8147	0	11.154	32.8364	0	0	0	5.25167	28.1779	0	13.5598	0	37.0663	0	1.75042	0	6.78105	0	9.58268	0	0	8.55718	0	0	15.3755	17.9316	0	0
22.6396	0	13.0018	40.5073	12.737	31.0444	7.13012	10.175	8.84737	8.36204	0	0	39.7476	0	0	0	47.9187	5.67818	0	21.3703	0	11.94	39.1437	12.4618	0	14.5961	4.15865	0	26.8936	0	4.84743	0	0	24.1255	0	9.79682	23.5424	21.3298	14.8736	0	11.2489	33.3333	0	0	0	42.5644	20.7324	15.8706	15.4093	5.85958
0	25.9637	3.83698	0	0	18.6682	0	0	22.8392	0	13.0491	0	18.0036	18.3943	42.5685	0	0	16.2547	0	48.3564	10.1376	0	0	0	0	0	12.9041	30.3293	0	0	0	38.4836	0	0	10.5945	0	0	12.9338	0	0	0	15.471	30.4038	18.2025	22.5893	0	0	0	0	0
11.0803	28.0591	0	0	17.7047	18.3434	37.4384	9.47069	29.3676	19.279	16.1385	22.6863	0	18.0634	0	53.7261	0	0	23.6156	0	42.6719	16.7742	0	50.4102	35.4739	0	0	19.5603	30.7172	35.3986	18.9891	15.0634	0	18.3329	0	0	12.1702	6.3945	0	21.2672	9.872	0	0	0	33.3333	0	0	18.253	16.5294	9.87654
16.5649	14.6645	34.536	18.2198	18.591	0	17.5336	30.7868	12.3962	40.0885	0	0	0	21.6209	9.0275	0	39.0364	31.0694	43.1742	0	0	37.0966	12.9757	16.5137	19.8962	0	31.0503	13.7734	0	0	28.4859	0	26.1472	28.5066	5.49853	79.2682	23.9196	0	39.7894	31.3378	14.7485	0	22.8655	18.2578	0	47.4255	26.2557	21.9648	0	3.20155
16.6501	16.0099	0	15.7418	0	8.13699	0	0	0	0	35.6744	19.8066	15.5109	0	0	0	0	11.887	0	0	17.9349	0	0	0	0	46.544	5.85225	0	0	6.77464	0	0	18.0895	0	34.147	0	0	0	21.7009	0	0	37.086	18.1638	0	0	0	21.8596	0	15.1507	25.2604
0	0	0	0	16.2616	14.5476	0	0	22.7817	0	0	8.03511	0	0	13.3968	0	0	0	0	0	0	0	4.81584	0	0	0	0	0	19.6726	0	22.5408	0	0	17.0274	0	0	0	12.3628	0	0	0	0	0	31.3315	22.9024	19.8259	0	6.84884	13.0722	9.30606
0	0	0	0	0	0	11.6324	0	29.9167	0	0	0	0	11.9413	0	7.40118	0	0	6.67497	26.0991	0	0	0	0	0	0	0	11.5559	16.0138	0	0	0	0	14.1947	5.86391	0	15.6925	0	0	8.57797	41.6862	0	2.07917	0	3.49677	0	15.4395	0	0	0
0	0	8.59018	0	0	0	14.7462	0	0	0	20.9702	0	0	43.3003	0	0	0	0	0	0	0	26.5509	0	0	33.3333	0	16.1275	0	0	0	0	0	19.1146	0	0	33.3333	0	22.5191	42.8555	0	0	34.2789	0	0	0	19.7336	0	28.5209	0	1.62857
16.6833	20.3809	33.3333	21.4254	19.1846	15.1279	14.6507	52.1544	21.7595	23.9346	0	0	10.3315	0	26.4699	43.3992	0	0	18.4339	10.8598	0	0	21.6861	18.4098	33.3333	8.50187	0	0	0	9.36862	0	0	14.1589	33.3333	0	32.5456	38.1151	33.3333	0	7.71408	0	0	0	10.934	10.4757	0	14.276	0	31.3435	0
35.9931	14.8049	41.7968	45.2327	33.3333	35.2001	0	0	0	41.5885	0	10.5845	39.6913	5.73993	45.3016	30.4885	0	0	27.9156	18.429	13.3473	33.3333	39.6726	33.3333	13.5319	18.5626	10.9924	27.4866	42.9858	33.3333	20.4882	27.8579	0	0	19.0308	0	0	5.42562	5.19268	0	19.3086	0	24.7842	23.7971	0	5.05438	7.01833	26.4845	0	21.8694
0	0	0	0	0	0	21.7009	0	10.5516	0	8.3832	13.5267	0	23.3664	0	0	0	48.8361	0	0	48.7318	0	0	0	0	0	0	11.3475	11.2892	0	0	42.5343	15.2439	0	12.763	0	0	0	0	33.3333	24.9804	0	0	18.7453	6.83213	0	0	0	20.2612	24.0273
0	19.5008	0	0	0	16.919	18.5871	16.1455	11.5738	0	14.6913	25.2982	0	0	0	0	0	0	0	0	0	0	0	48.2569	0	11.0674	24.6825	33.3333	0	17.1901	33.3333	0	0	0	0	12.3361	0	0	0	0	0	28.6351	54.9728	0	52.6942	13.5075	0	17.1084	2.42915	1.61459
30.6736	29.3035	0	17.6001	0	0	18.6826	0	0	34.4768	12.3631	0	34.4662	15.6521	14.8317	18.7111	100	0	46.9755	40.738	19.986	33.3333	12.5598	0	19.8015	0	9.01202	0	10.0387	33.3333	0	0	19.1744	16.3059	0	0	27.7919	15.5449	11.5617	0	14.0248	0	0	15.1922	0	13.5997	36.9511	21.0373	12.2283	0
0	0	16.2797	0	31.2205	10.0685	0	31.7	3.41662	0	7.91777	22.7488	0	0	0	0	0	39.2769	0	3.87416	0	6.78246	21.2657	0	0	15.3241	33.3333	16.2766	0	0	23.6376	29.6077	14.2188	19.1386	28.1953	21.785	18.4005	10.8142	18.6893	50.3746	0	0	0	0	3.59876	28.279	4.45537	0	5.51507	16.2937
0	0	17.3483	12.2515	12.5965	0	0	6.58615	16.0632	0	3.53011	11.9852	0	0	10.8544	0	0	0	0	0	0	10.5459	0	0	12.4848	7.30303	0	0	0	0	0	11.8322	0	10.4098	28.2311	7.49235	0	13.2621	6.22956	0	12.1841	0	0	0	0	0	0	14.8722	0	0
3.94604	0	0	0	0	0	12.7363	0	0	0	0	0	0	0	0	14.9057	0	0	0	0	5.05741	0	0	25.4126	0	0	0	0	13.9882	18.4965	0	0	0	0	0	0	17.7921	0	0	0	0	0	0	0	0	0	0	28.337	19.2363	0
12.5131	17.1067	0	0	0	14.2339	0	0	0	33.3333	18.8635	0	0	0	14.8004	0	0	50.1043	23.9607	10	0	14.0813	10.6384	0	0	23.4256	24.7102	17.9989	0	0	20.6945	14.6593	22.4987	17.3261	0	0	0	0	0	0	33.3333	16.6611	33.3333	0	0	0	17.4129	0	0	0
33.3333	66.6667	15.6605	10.4399	8.69518	40.2459	25.0289	21.3043	58.8208	0	25.8194	33.3333	49.0616	45.1501	22.2994	33.3333	79.558	33.3333	14.8157	14.4415	14.1231	0	21.3532	18.2076	11.2849	0	18.6202	11.5521	14.5963	47.6334	12.524	21.5011	40.2865	0	21.0482	61.4052	55.2418	20.0712	0	18.7571	22.3359	0	33.3333	13.4332	14.7281	18.5343	12.8573	0	16.9761	0
17.7785	0	33.3333	53.5547	33.3333	0	0	0	0	0	0	48.2565	33.3333	15.7215	22.4789	17.8557	0	0	33.3333	33.3333	6.3099	56.1208	0	33.3333	0	26.0303	10.3799	16.1522	19.3452	0	0	0	0	36.64	0	0	3.75134	0	4.41892	0	0	0	0	66.6667	58.8625	40.0779	27.7072	6.74428	0	28.596
20.8202	16.2266	25.4674	0	20.7368	19.0994	0	50	12.2414	33.3333	27.508	0	0	21.5166	0	18.4276	0	16.5623	0	0	33.3333	0	33.3333	0	61.5714	0	0	0	22.5691	0	16.5202	33.3333	11.3626	0	0	0	0	0	0	33.3333	21.1493	15.2989	15.9204	0	18.6052	0	0	14.9289	33.3333	43.4041
0	0	8.19041	10.6419	24.6382	22.3965	15.3673	0	12.8746	33.3333	24.279	0	17.6051	0	0	0	0	0	27.8903	42.2252	0	0	0	0	0	18.2683	15.6169	54.2968	18.737	0	38.4292	18.6741	10.8346	26.7531	24.026	31.1024	0	0	0	14.5762	0	33.3333	0	0	0	0	0	0	25.8853	0
0	0	0	0	0	4.02423	26.2705	22.1095	0	0	0	0	0	17.6118	18.533	0	20.442	0	0	0	41.1763	0	11.9801	23.0464	14.6589	0	30.6727	0	10.7643	0	0	0	0	0	0	0	11.7899	33.3333	66.6667	0	10.9974	0	0	19.9001	0	29.9404	21.5466	31.5854	0	0
11.6088	0	0	13.1119	0	0	20.597	0	0	0	0	6.42504	0	0	11.034	0	0	0	0	0	0	19.252	22.6949	0	0	24.9728	0	0	0	33.8701	11.8322	0	15.0175	8.87103	26.6947	0	11.4248	33.3333	22.6849	33.3333	0	18.0344	0	0	7.80414	11.4474	0	3.5323	0	4.73734
0	0	0	0	0	0	0	0	0	0	0	0	0	0	0	15.4777	0	0	0	0	0	0	0	0	0	0	0	0	0	0	0	0	0	0	0	0	0	0	0	0	0	16.6723	17.4129	0	0	0	20.476	0	4.56898	23.2626
0	0	27.8312	0	0	26.5691	0	0	23.8815	23.4132	0	14.725	27.6807	34.3933	27.8856	11.9683	0	0	44.2954	37.6796	17.2801	11.9369	18.4119	0	10.531	0	23.63	0	17.6039	0	33.3333	16.6305	20.8647	0	0	0	0	0	0	0	13.2433	0	0	0	0	0	0	13.9435	0	7.31401
62.3418	81.5117	46.3156	84.1602	74.1539	54.7567	66.5872	24.6123	38.3145	49.5322	69.7645	46.6105	57.6829	13.8964	23.185	38.4312	57.6117	85.4588	0	33.3333	42.4432	33.3333	51.5231	51.2828	54.3028	82.8194	51.0544	82.8534	24.5627	92.9051	50.6993	51.2118	33.3333	71.1596	0	33.3333	33.3333	21.6142	0	33.3333	24.7393	0	45.9051	9.58643	0	0	18.8113	0	18.064	0
0	0	0	0	0	0	0	35.567	0	0	0	0	0	0	0	0	0	0	0	0	0	33.3333	0	25.2993	0	0	0	0	20.4332	0	0	0	0	0	83.2904	38.7943	0	20.6485	83.746	39.1139	33.3333	62.5701	22.1596	39.2471	91.6622	74.0868	24.3971	32.3322	0	9.95919
0	0	0	0	0	0	0	0	0	0	0	0	0	23.9269	0	12.8971	0	0	20.728	20.5756	0	0	0	0	0	0	0	0	0	0	0	0	20.1261	0	0	0	43.3922	0	0	0	17.0398	0	0	16.9049	0	0	0	0	26.2551	51.7516
4.03573	0	0	0	0	6.76419	0	17.4261	17.5429	9.92013	5.56508	0	5.6526	0	13.1688	21.3651	0	0	21.8204	0	8.22428	21.3965	0	0	22.8024	17.1806	0	0	8.77065	7.09487	0	0	0	1.81724	0.758516	0	0	0	0	0	8.59403	0	0	0	0	0	33.3333	8.4491	10.5838	12.076
0	3.87551	13.3652	10.0296	7.78673	7.21929	0	0	3.10015	0	0	34.4154	0	0	0	0	0	0	0	0	0	0	0	7.18822	0	0	0	0	15.7295	0	0	15.4548	0	0	0	27.8723	0	21.2934	0	9.66222	0	8.72839	0	0	0	0	8.93622	27.0395	0	0
12.8928	0	8.07121	0	10.9141	0	0	0	0	7.20372	0	0	0	13.5874	0	0	42.3883	5.3171	4.98967	8.41142	9.05223	0	1.98257	0	12.3639	0	15.6123	0	12.9001	0	0	0	0	0	0	0	0	12.6849	0	0	0	0	20.652	27.4195	0	0	0	0	0	0
5.3267	0	4.41682	0	7.14536	4.69071	22.5886	14.433	0	0	8.71553	4.24908	3.49626	0	25.2043	15.3383	0	0	0	0	7.82897	0	15.1436	0	0	0	9.70338	10.2027	0	0	3.42944	16.7029	0	8.15222	1.47566	0	0	11.7191	0	0	3.05023	0	0	0	8.33779	14.8979	0	0	15.2693	2.75247
0	0	0	0	0	0	10.8242	7.96163	0	0	0	0	5.48747	0	10.5564	0	0	0	8.16662	0	0	0	0	16.2297	0	0	0	0	0	0	0	0	25.6759	0	14.4754	0	23.2745	0	16.254	17.8905	0	10.5611	0	6.842	0	11.0153	14.5221	18.2357	7.07819	11.2981
15.403	14.6128	0	5.81021	0	0	0	0	17.161	9.93074	15.9549	0	0	14.196	0	0	0	9.2241	0	0	15.1713	0	12.9389	0	0	0	0	6.94389	0	0	12.5379	0	0	18.871	0	0	0	12.0399	0	0	0	18.1404	11.2833	0	0	0	0	0	22.7495	4.84856
0	26.9457	0	24.073	53.3572	12.4832	3.07346	0	8.93209	0	37.2674	0	12.5384	0	0	12.3287	0	33.5682	0	18.9517	9.89256	19.0846	0	24.0904	23.7664	0	0	0	12.4715	40.3444	0	2.50644	0	45.0034	0	0	0	12.5436	0	0	0	0	0	0	14.5169	0	9.20164	0	6.60899	0
0	17.0229	20.4084	0	0	0	33.3333	59.6264	25.4087	42.6715	0	77.3489	0	20.9967	25.8326	24.7471	0	0	30.433	9.41023	18.4299	21.8105	0	32.169	0	45.2039	10.4026	47.4594	27.2486	15.1778	24.6864	26.2138	21.9676	0	21.0342	67.8364	29.8532	0	0	5.21699	0	0	16.5994	19.7795	7.65297	0	14.6593	0	0	9.83844
26.3493	24.5946	0	61.3828	28.1227	28.4148	0	0	0	0	0	0	20.6538	23.5744	14.0595	18.5504	100	13.6894	22.5521	33.3333	22.8646	26.7151	56.1639	0	48.6078	24.7462	19.5942	14.6394	0	5.93785	33.3333	33.3333	57.1344	6.65557	0	0	0	33.3333	42.9537	0	7.17176	5.82765	8.47596	14.6241	0	33.3333	0	52.8943	9.60781	0
28.0028	0	66.6667	0	0	37.1162	29.4287	0	0	13.5072	11.7178	0	27.9897	12.3366	22.1044	21.0046	0	18.686	0	5.45749	0	0	33.3333	0	0	0	15.2596	0	33.3333	0	22.1042	30.8269	0	0	45.2132	0	33.0139	0	0	20.3145	52.4212	0	33.3333	0	52.1498	33.3333	26.4018	33.3333	0	44.214
0	0	0	0	0	0	0	0	47.0618	0	22.924	0	0	0	0	0	0	0	31.6902	11.5462	28.4288	0	3.61954	16.8232	14.7549	6.07993	0	11.9792	15.7964	0	0	0	2.90685	19.0367	0	11.7017	0	33.3333	0	22.1208	0	33.3333	9.31154	32.1678	18.7854	33.3333	0	0	26.7243	6.42928
0	6.45907	0	0	0	0	0	18.0255	0	18.2042	11.59	9.79744	13.016	16.1324	19.2739	9.63855	0	8.28267	0	0	0	0	0	0	0	0	12.9776	18.6939	0	23.9632	4.67061	0	0	0	0	0	0	0	33.3333	28.1163	0	0	0	13.5538	0	0	5.4485	0	41.9741	0
5.80464	0	0	0	2.17697	14.7792	0	16.6827	0	0	0	0	12.6795	0	7.50073	8.58626	0	17.8761	0	5.69775	0	10.1852	0	0	0	0	0	7.22814	6.08468	0	0	0	6.02776	10.3012	29.4868	0	18.7301	20.7897	11.1556	0	11.4223	17.0197	24.8574	0	0	0	18.2361	0	0	22.4527
17.5756	3.67868	0	5.28388	13.3095	0	34.1645	0	0	0	2.51845	4.90804	0	9.75892	0	0	0	0	15.3247	0	0	6.6182	0	9.24294	0	8.58713	13.7391	0	0	0	15.2055	7.11958	5.97285	6.22205	0	0	14.9228	0	0	13.0188	14.2454	0	0	19.8748	6.89498	0	12.8271	13.7723	0	0
0	6.38764	0	9.26037	3.03371	0	0	0	7.9246	25.6171	0	7.94563	5.34364	17.201	11.229	0	0	0	0	0	0	0	6.88323	17.6744	12.8708	0	18.0738	0	5.06542	5.37768	0	0	0	0	0	5.65513	0	0	12.5574	0	0	0	7.42234	0	0	0	0	0	15.0847	0
22.2677	14.9114	12.9249	0	0	7.20673	0	5.66538	10.6728	0	13.9823	0	7.77888	0	0	5.14439	0	7.89765	0	15.6033	20.384	15.5863	0	0	0	15.3828	9.95307	0	0	9.19919	0	0	5.99052	12.7811	4.2659	14.8068	3.48016	0	0	11.2126	14.7392	43.8193	0	0	0	0	13.2255	0	0	17.0656
0	0	7.35844	7.49673	0	0	15.95	0	0	0	0	22.1788	0	5.07543	0	6.91993	10.3428	0	8.62539	7.28754	0	0	7.29406	0	0	0	0	0	0	11.3005	0	0	8.83488	0	12.2562	0	0	33.3333	4.72601	0	0	0	0	7.80479	0	41.5634	10.1569	0	0	32.6107
0	0	0	0	2.95923	0	0	10.6856	3.8112	5.92478	0	13.1509	3.14042	19.4291	22.1309	0	0	5.51683	0	4.00849	0	33.3333	0	17.8939	34.0017	0	23.1305	8.03922	27.1135	0	38.9177	18.0429	7.25493	12.9644	0	2.06706	0	21.2897	0	14.1572	9.50907	0	4.11551	17.3819	38.2983	13.8653	0	0	33.3333	0
0	0	17.0848	12.3518	14.1503	14.6697	9.08907	7.21455	0	58.0885	10.1704	5.20833	17.9757	4.25864	17.4938	25.8213	0	0	26.3811	0	17.5318	4.50545	15.6073	35.5068	20.2057	3.75791	12.6911	16.0192	0	4.52072	5.74608	14.2986	0	3.78701	7.33057	0	24.5328	16.3859	10.7355	7.78349	9.32325	0	0	0	6.50922	0	0	27.2563	0	0
0	1.79516	10.3664	0	0	0	0	0	3.80701	0	4.25306	0	0	0	0	0	13.6416	5.47713	0	0	14.0745	3.74932	0	0	0	0	0	20.4647	0	0	0	19.842	24.4985	16.1824	33.3333	0	28.058	0	15.3348	0	0	15.7172	29.0149	26.6398	0	0	14.4902	22.4374	0	21.0559
4.898	0	0	0	0	0	21.3414	7.49243	0	0	0	0	4.52107	0	0	0	0	7.71762	28.2763	8.27209	0	0	0	0	0	0	33.3333	8.51909	0	0	0	0	18.854	5.81152	0	2.59332	0	0	0	0	0	0	0	0	0	0	17.278	0	33.3333	34.0559
0	9.15635	23.6787	0	11.1149	35.9743	5.69204	0	22.3266	12.485	18.9914	20.1824	0	8.52555	14.3311	0	0	0	6.95224	7.06856	38.7029	0	6.90283	0	21.2881	33.3333	0	7.84713	13.7383	0	7.46081	0	0	0	0	7.58206	33.3333	0	0	0	0	0	0	0	0	4.08129	0	0	33.3333	0
4.41242	0	0	0	0	0	0	0	3.64367	2.53679	0	39.2795	21.1037	7.23244	0	9.21977	0	0	0	0	0	0	4.59579	15.9239	11.3769	25.2571	9.39193	0	0	0	0	0	0	0	15.4219	0	0	0	22.5978	16.091	48.9901	0	29.375	15.9515	0	0	33.3333	19.3828	0	0
0	0	0	0	22.2185	0	0	0	0	0	0	0	0	13.9042	0	0	0	0	18.032	0	0	0	0	15.2359	0	0	0	0	0	22.0328	27.749	42.6521	0	0	0	0	0	20.9428	21.6439	18.5222	0	50.9494	0	0	0	0	24.7417	0	0	0
0	57.5103	0	80.1515	49.5572	18.6636	0	0	0	0	20.2719	0	0	0	0	40.8453	0	27.8562	0	33.3333	29.6908	0	0	15.4394	0	29.5754	10.2028	12.8687	0	62.146	0	0	26.0784	61.2546	21.0771	0	8.80052	0	0	0	24.0101	0	0	23.8372	55.1925	0	0	10.8959	0	12.2775
90.6896	31.5382	41.5116	0	0	30.6924	47.9275	74.6074	66.4115	20.9649	46.3133	0	53.2591	41.5746	46.0442	17.1936	76.0156	53.4322	11.7329	40.03	0	58.4119	65.6	0	13.1276	8.0762	11.2503	26.242	59.1482	0	20.1264	5.16442	14.4793	0	10.5809	87.7576	5.27535	8.04832	24.9619	43.446	8.16748	0	37.4945	8.38488	0	40.4901	0	20.0276	0	0
0	0	0	0	0	0	0	0	0	0	0	0	0	21.3993	0	0	0	0	25.3413	0	24.6096	33.3333	0	13.984	0	8.94029	0	0	0	39.6881	0	14.9376	0	0	18.9425	0	18.7017	0	0	0	8.7825	18.3065	9.78114	0	0	0	5.374	7.6251	0	0
12.6843	25.6313	28.3152	14.06	70.0038	22.0924	0	0	23.0159	42.9071	22.0074	60.6019	22.1795	0	51.8138	50.7832	0	33.3333	45.117	25.4726	0	0	0	48.221	62.2114	0	33.3333	46.8813	13.2616	0	49.8374	6.85838	47.5703	21.1068	14.3281	0	13.7709	25.0371	25.3148	0	0	12.2489	0	31.5255	87.5765	57.5023	33.8041	12.8163	17.1518	46.9179
18.0156	0	0	0	0	16.2753	25.0811	0	0	0	0	0	0	0	0	0	0	0	0	0	22.4781	0	21.3183	0	0	17.7044	0	0	28.6361	13.9855	0	0	0	27.2418	0	0	33.3333	8.22991	33.3333	42.9769	0	12.8335	0	0	0	0	0	0	31.6108	23.8025
0	0	0	17.4201	0	24.4235	12.7655	0	0	33.3333	0	10.5612	15.3867	0	0	33.3333	100	27.4043	0	0	10.9466	0	0	0	0	15.6004	33.3333	0	0	0	0	0	0	33.3333	33.3333	0	0	18.3843	0	0	0	0	55.9864	0	0	33.3333	0	0	0	0
0	33.3333	38.3515	16.3438	0	0	0	35.8021	23.954	0	0	9.43517	0	0	0	0	0	0	7.99199	33.3333	3.81745	0	0	9.83236	0	0	14.8056	0	0	1.92226	0	43.8716	19.0964	0	0	0	0	0	0	0	16.2826	0	16.2569	33.3333	0	0	10.0248	0	10.2473	5.38345
0	0	0	0	0	0	0	0	0	5.62198	18.431	0	0	0	29.4874	0	0	24.6016	0	7.86072	6.87442	0	0	11.3982	26.2452	41.0928	0	38.1572	0	36.2603	19.5155	18.3957	0	12.2265	0	0	14.6316	33.3997	0	33.3333	0	0	0	0	1.81439	9.16434	27.9593	11.7156	10.4382	0
35.6169	4.71596	0	19.2734	16.4702	17.0581	33.3333	50	33.3333	11.3803	16.8173	0	29.1005	0	0	0	0	0	0	0	0	0	0	0	11.5435	0	0	0	7.44368	0	0	0	33.3333	6.09154	33.396	57.0934	19.5625	0	0	5.33261	57.8842	44.8583	0	24.6961	0	0	0	33.3333	15.002	0
0	0	0	0	0	0	0	0	10.3175	0	11.326	5.54562	0	0	0	11.7223	0	0	0	0	12.0412	0	45.3483	0	0	7.86945	18.5277	0	33.3333	8.14384	10.9174	6.68384	0	0	0	33.3333	0	14.949	0	0	0	0	10.6803	0	4.98418	0	0	20.5171	5.93421	9.53084
20.6491	0	33.3333	32.9027	0	20.1508	20.5678	14.1979	0	0	14.9024	11.8721	0	11.9341	18.6988	4.16119	0	5.92907	21.5497	0	7.03775	66.6667	0	9.51695	0	8.79265	0	14.9615	4.69726	0	5.91187	0	0	0	0	0	0	0	0	0	0	0	7.29533	0	5.62489	0	2.76764	0	0	14.3653
13.0342	2.98605	0	0	13.526	0	8.25224	0	9.37934	6.75731	16.516	1.98397	33.3333	33.3333	0	0	0	8.73173	0	33.3333	12.1949	0	33.3333	7.04743	0	0	0	0	12.628	0	13.8179	9.2529	0	0	0	9.57324	0	0	8.0185	18.3572	17.0508	11.7528	0	10.4451	0	0	20.0701	13.9926	9.61567	0
0	0	0	0	3.26496	0	0	10.2024	0	0	0	0	2.74188	7.88237	0	2.8314	0	0	0	0	0	0	6.58038	0	5.82373	0	14.9252	9.61058	0	0	0	10.0784	3.81145	15.7768	18.6859	0	26.6016	0	5.22471	7.80932	8.76344	40.6119	4.04689	3.50819	1.45717	1.1095	16.626	13.5916	0	12.3593
0	0	7.35165	0	0	5.68591	0	0	4.75411	0	3.14714	4.94811	0	0	6.11174	15.7582	5.7925	0	19.3718	0	0	3.57122	1.46537	0	0	5.13469	0	3.99175	0	0	0	0	12.2642	0	0	0	0	3.51464	5.94468	0	0	0	11.2647	14.9214	1.94932	2.25735	0	0	0	4.27589
0	0	3.85907	0	0	0	0	0	4.14742	0	0	0	0	0	8.36372	0	0	0	0	0	0	0	0	0	0	0	0	0	0	0	0	0	0	0	0	3.97937	2.92551	33.3333	0	10.5247	0	0	6.32479	0	0	0	5.42964	23.7354	27.6124	10.2401
21.0023	0	0	0	0	0	0	0	0	19.4044	7.12371	11.0616	5.80683	0	0	8.88231	0	0	4.53962	16.6469	0	2.42731	2.5305	15.2377	6.61995	0	26.1225	0	5.03704	0	0	0	0	26.8634	0	0	0	0	0	0	0	10.7719	0	33.3333	0	0	0	0	0	8.23952
31.184	30.2303	14.4904	23.9201	23.2758	33.3333	20.5005	0	0	12.4795	9.17049	0	0	0	6.09756	0	21.9203	27.6954	16.504	0	27.4469	13.0158	0	15.5116	6.54195	33.2689	9.39143	8.63999	15.5233	46.6658	10.5696	28.2737	6.1388	7.51935	0	0	0	11.7572	0	0	0	12.5294	0	0	0	0	0	0	0	0
0	0	0	0	0	6.69503	0	8.25128	25.6459	0	0	0	0	5.53622	24.9696	21.985	0	0	5.93587	0	0	0	0	0	0	0	0	0	0	0	0	21.8345	8.406	0	30.0218	5.13547	28.2434	0	44.2504	26.6605	37.449	0	12.5096	0	17.6538	11.3305	24.0332	0	0	4.86611
0	0	0	0	0	12.1311	20.7654	0	0	0	26.2096	36.2973	33.3333	0	33.3333	0	0	0	0	33.3333	0	0	0	0	27.8025	6.59171	9.88701	44.4243	33.3333	0	15.6539	0	0	11.9323	0	29.354	21.7509	0	0	0	0	0	0	0	0	0	7.14214	33.3333	0	29.0574
34.5133	39.0115	40.9294	13.9414	9.96581	26.6383	0	31.5463	20.4264	13.9289	33.3333	11.9269	33.3333	33.3333	0	0	72.2872	20.5333	0	0	16.5312	33.3333	40.1815	5.7622	0	23.5388	15.9085	0	0	33.9779	0	0	6.83026	0	0	0	0	29.8187	0	0	0	20.8039	29.2864	29.8251	0	0	0	0	0	0
0	0	0	0	25.5124	0	46.1661	0	21.7073	54.1872	0	0	24.7846	53.2481	0	50.5431	0	0	0	50.0198	0	16.7464	29.3375	51.429	0	17.6734	0	0	17.81	0	56.0971	0	45.9965	0	51.2923	0	20.4785	0	32.0579	45.9342	33.3333	0	0	18.4119	52.2672	59.218	26.0075	29.3397	72.3876	30.9617
13.3004	30.7582	33.3695	62.1384	37.981	15.5164	12.5679	50	23.319	0	21.0157	35.7661	0	0	21.124	0	0	51.7713	53.6486	0	56.0219	30.906	19.9048	12.0596	53.2118	13.7925	23.7654	33.3333	28.2963	19.3563	17.6794	39.8134	16.5528	37.9081	0	61.5312	0	21.5761	12.5223	9.07125	20.4542	15.2829	36.5676	0	26.6725	26.0846	20.7616	0	0	0
43.1552	0	0	0	0	28.0576	0	31.3366	0	23.6191	19.1848	0	0	19.2136	23.3424	16.193	0	0	24.0429	0	0	0	0	0	0	0	13.6031	46.0292	0	18.3412	14.7903	0	0	0	0	0	0	29.6542	0	0	0	0	0	45.8746	0	0	0	0	0	29.7124
0	23.729	0	0	0	23.2915	0	0	30.1965	0	0	0	40.4382	0	18.1314	19.8321	91.1446	0	0	0	0	0	14.6274	0	0	0	24.4191	0	0	0	0	0	0	0	13.3976	33.3333	14.4166	7.71854	0	0	18.3476	18.6267	0	0	0	0	8.82248	37.6142	0	4.90764
0	0	0	0	0	0	33.3333	0	0	9.53029	0	0	0	63.477	0	0	0	12.1872	0	0	15.2623	10.0541	0	28.1269	0	13.9683	0	0	0	6.58854	0	12.1119	32.2521	33.3333	34.4329	0	0	0	22.9298	41.2441	0	0	0	0	0	33.3333	0	0	38.4935	0
0	0	33.3333	0	15.2305	0	52.6619	0	0	0	0	5.41589	0	0	33.3333	0	0	6.27798	0	51.4061	0	18.2867	0	9.92704	17.7278	0	0	14.2306	8.34126	0	8.75187	0	0	33.3333	0	0	33.3333	12.0701	23.3257	33.3333	27.9705	33.3333	11.728	24.0086	0	0	27.3672	17.1425	0	0
23.5114	18.233	24.5415	0	33.3333	19.8448	0	0	0	0	41.5804	33.3333	0	10.6939	0	0	0	0	0	0	9.56887	0	16.1649	0	0	66.6667	13.5522	0	0	11.456	0	58.8696	0	0	8.10279	0	18.9167	0	33.3333	0	21.318	5.74158	10.9966	0	33.3333	0	0	7.01459	0	33.7523
0	0	0	16.0086	0	0	0	58.8337	0	9.71426	0	49.5655	15.9228	0	5.99638	31.6421	0	15.4711	9.29047	0	18.0711	23.2792	0	0	33.3333	19.3651	0	12.9304	82.2755	45.5263	37.0214	0	16.7538	0	17.5314	33.3333	33.3333	0	0	25.4226	14.9857	33.3333	0	13.0978	0	0	41.7502	0	15.6431	0
33.3333	0	0	0	33.3333	0	14.0047	0	33.3333	23.803	0	0	6.45342	0	0	0	0	33.3333	33.3333	0	0	33.3333	0	0	0	0	33.3333	22.4255	0	0	0	21.2214	33.3333	0	0	0	0	33.3333	0	0	0	0	33.3333	9.32476	0	0	0	0	33.3333	0
0	9.60436	0	33.3333	18.1028	0	0	0	0	33.3333	33.3333	0	0	0	15.2019	0	0	21.1461	33.3333	48.5939	33.3333	0	0	40.1255	0	0	8.91419	0	0	0	0	7.79707	0	0	0	0	0	17.2238	3.6548	0	0	0	0	0	0	0	3.17552	0	12.5301	3.62095
0	15.1004	33.3333	50.658	0	28.8061	0	0	3.1368	0	5.9014	11.6853	33.3333	0	0	0	0	0	0	0	23.7645	15.0467	33.3333	0	0	0	0	0	0	14.5519	14.855	0	0	33.3333	26.5353	0	0	0	0	0	5.36282	8.96509	43.9421	0	33.3333	0	0	16.1908	0	0
0	0	8.7918	0	0	0	0	9.82968	33.3333	0	0	0	3.85227	6.61553	3.99457	32.3327	8.85543	11.5843	0	0	0	0	35.8744	21.8206	15.6055	0	6.17802	4.38429	9.38328	3.53611	24.5815	0	17.6607	0	0	0	0	0	16.7564	0	12.0154	0	0	7.69431	0	0	18.8846	22.0378	0	28.0068
0	0	0	0	0	0	17.1618	0	5.49517	0	0	1.67261	0	0	3.7545	0	0	0	0	19.986	0	0	0	0	33.3333	0	4.66224	1.78491	0	0	0	0	0	3.9871	11.1393	1.19407	24.1192	0	0	6.50705	0	9.47236	0	1.25414	0	10.5741	18.3007	22.676	0	0
0	1.16247	3.06225	0	0	0	0	5.18547	0	2.49351	0.822773	0	1.3597	0	0	0	0	0	0	0	0	0	3.37476	4.13869	0	0	17.7503	3.49388	8.13321	0	23.7897	5.49879	0	0	12.0551	0	11.6496	21.4696	0	2.92198	0	0	0	6.24438	2.34404	0	0	0	8.58353	5.05339
0	0	0	0	0	0	0	5.85814	2.00666	0	0	5.36814	0.461051	3.93125	0	0	0	2.91956	11.9149	0	0	7.05419	0	14.0782	4.80516	18.9043	0	0	0	0	0	0	5.73196	8.15188	0	0	0	0	3.55184	0	15.6143	11.9404	13.3078	8.57082	1.05673	0	0	14.8417	20.2427	0
12.4461	5.46632	6.55121	7.73673	11.3754	17.351	0	0	0	5.32493	0	0	0	0	5.90699	9.90997	22.434	2.64069	0	4.49129	11.3681	0	0	0	0	0	0	2.69945	0	5.95127	5.5914	9.6035	16.5052	7.13002	0	0	5.15688	10.9222	0	2.42713	0	0	24.7438	3.55584	0	0	14.9744	19.839	3.83372	17.9277
3.29921	2.42807	3.23329	6.14829	4.15418	0	5.82174	2.7292	7.62365	7.38683	4.7981	0	0	4.40461	0	0	0	0	0	0	2.67333	0	0	5.87456	0	0	0	0	0	0	0	0	0	0	0	0	15.2813	7.03921	1.94151	0	0	0	0	2.50931	0	0	10.6712	2.64489	21.4016	6.04297
0	0	0	0	0	0	1.89576	0	0	0	12.1824	0	0	0	0	0	0	0	0	0	0	9.91828	0.682812	0	0	0	0	0	0	0	0	0	0	0	0	0	0	0	0	0	0	0	0	0	0	0	33.3333	0	13.0906	12.3893
0	0	0	0	0	0	0	0	0	0	0	33.3333	0	0	0	0	0	11.5992	0	0	0	0	0	0	0	0	0	0	25.2001	0	0	0	0	0	0	0	0	20.2749	0	0	0	0	0	13.0599	0	0	0	0	0	0
30.0341	39.1272	8.15763	9.50146	57.2535	20.7645	35.955	0	13.0656	0	82.1967	0	15.4664	44.5336	0	9.43388	77.566	10.0574	0	18.6358	30.66	59.6125	33.3333	23.3689	12.7806	46.7341	0	8.26981	33.3333	34.4146	37.2855	0	0	4.42581	0	45.9439	27.2661	0	0	0	0	28.9239	21.1864	23.5084	0	30.7715	4.36149	21.5067	11.9318	27.2904
0	29.4613	56.8822	0	0	31.193	0	44.1419	59.1648	27.5961	0	27.9652	32.8723	0	0	0	0	0	54.7518	0	0	0	0	29.2196	0	0	44.2541	62.1823	33.3333	0	33.3333	51.5644	49.8769	26.2033	76.8056	32.1393	0	14	33.3333	88.1438	57.333	45.2539	40.7619	0	65.6099	58.6543	18.359	18.4916	0	15.4056
54.2206	22.3547	22.1135	76.6135	27.2169	30.6914	39.1657	42.0853	12.6441	57.1986	0	31.6607	49.8406	47.1306	57.0052	80.6562	0	72.7831	33.3333	56.8869	55.2985	23.4151	62.6091	23.3201	49.0809	34.3616	33.3333	21.5696	0	59.6341	0	33.3333	27.8859	50.1019	0	20.7228	16.5269	26.2941	61.1733	0	27.0527	4.40941	0	41.2972	30.9893	0	0	0	20.9161	15.8906
0	0	0	0	0	27.1464	0	0	0	0	25.2327	0	0	0	30.9881	0	0	0	0	24.0804	0	16.3587	0	14.9242	30.6596	17.9221	0	0	0	0	0	0	0	0	0	0	10.4839	0	0	0	0	0	0	0	0	0	11.986	17.6394	19.5113	0
0	0	0	0	0	0	0	0	0	0	0	12.3637	0	0	0	0	0	0	0	0	0	28.6863	14.4076	0	0	0	28.0466	0	0	0	18.1442	0	0	23.1061	13.8025	0	0	39.4878	0	0	0	8.12134	30.779	0	0	0	0	0	0	6.29193
0	0	0	0	0	0	11.151	0	0	0	0	0	0	0	13.2391	0	0	0	13.725	0	0	15.2262	0	18.8665	0	0	0	0	0	0	0	9.26937	26.1622	25.4914	0	0	32.9061	0	0	48.2763	21.8216	14.4791	29.1337	61.2245	0	49.8765	35.3439	13.0271	45.4688	13.8358
44.6485	0	18.4228	0	14.5997	0	13.8067	0	17.2862	0	0	0	0	0	0	0	0	66.6667	0	0	0	9.94703	14.9039	0	33.3333	48.7446	11.7739	0	0	26.262	0	33.3333	0	0	0	0	0	33.3333	0	0	33.3333	0	0	0	0	0	0	0	0	0
0	0	33.3333	0	15.3346	0	0	0	0	33.3333	0	0	0	0	0	25.4543	0	0	0	0	33.3333	0	10.9254	0	0	22.4352	33.3333	0	0	0	0	0	21.774	0	0	0	19.2224	0	66.6667	0	0	16.2574	0	0	33.3333	0	10.5817	5.28946	0	49.3292
0	33.3333	0	14.8571	0	66.6667	0	50	10.7367	0	33.3333	47.5288	0	0	31.2211	0	0	0	52.9417	26.8268	0	0	0	34.5272	0	0	0	33.3333	29.4145	0	10.5791	0	0	33.3333	33.3333	0	0	0	0	0	23.7013	31.7662	22.1492	0	0	0	6.99722	0	0	10.6868
0	0	33.3333	0	0	0	22.1823	0	0	0	0	0	10.5983	66.6667	0	0	100	0	0	0	0	0	18.4294	0	2.67377	0	21.5594	0	66.6667	0	22.7541	0	0	0	19.5309	0	8.65591	0	0	0	11.5117	0	0	0	0	16.7901	0	31.14	5.01678	0
22.0182	33.3333	14.9106	33.3333	18.7337	6.18698	0	0	33.3333	0	0	33.3333	0	0	2.34525	74.5457	0	33.3333	0	9.25291	0	0	0	0	33.3333	10.8981	5.28678	0	0	7.07132	0	0	11.5593	0	0	33.3333	0	27.1789	33.3333	33.3333	0	0	8.71541	5.44218	0	0	21.7691	0	13.8221	11.0456
33.3333	0	0	18.4762	51.3321	0	52.86	0	16.0471	33.3333	8.10065	6.77418	0	0	0	0	0	0	33.3333	0	66.6667	11.6746	8.00035	31.6822	0	0	0	0	3.91884	66.6667	15.1893	57.3973	0	10.2273	0	33.3333	28.7318	0	0	2.96555	0	0	0	0	0	0	10.7656	28.0439	16.1811	0
0	33.3333	0	33.3333	0	0	0	0	22.5967	33.3333	0	0	56.0684	0	22.2064	0	0	0	0	6.50651	0	18.1071	0	0	0	0	0	0	0	0	33.3333	0	7.17114	7.84193	0	0	0	0	0	15.4248	9.63203	29.3759	9.22277	0	33.3333	0	2.55638	4.86019	0	8.81072
0	0	4.8487	0	0	0	0	19.2417	0	0	0	4.18482	0	5.03712	14.3973	9.101	0	0	0	0	0	0	2.72977	0	3.76258	0	9.53943	2.27289	13.6318	0	1.63383	0	4.81989	12.6248	20.2805	0.295013	0	40.4715	7.96725	5.82703	5.71447	0	11.9255	9.53586	0	3.22759	0	0	0	23.0146
1.98818	0.967917	0	0	6.73077	0	0	0	0	0	0	0	0	5.18246	0	0	0	0	1.27678	10.7493	7.95137	5.66662	2.33804	0	3.93588	6.14772	2.06246	1.75822	3.66046	0	0	17.3186	8.98857	0	0	0	13.6406	10.0881	8.82155	0	0	33.3333	0	0	0	0	19.391	0	0	0
5.18023	0	0	4.02233	10.6124	8.94405	0	0	6.85596	0	1.92722	0	0	0	3.98804	0	4.09698	0	3.95884	0	0	17.8688	0	18.0038	0	0	3.6354	0.983822	0	11.7039	0	7.64977	0	4.6201	0	0	0	0	12.1123	1.39643	18.7159	0	16.1349	19.1175	1.78472	7.05565	33.3333	59.3879	47.1509	19.406
2.98373	0	0	0	0	0	2.5476	0	4.79585	0	0	0	2.916	0	0	0	0	0	0	0	4.96302	0	0	7.46173	0	0	0	0	0	0	4.44541	0	5.13276	0	19.1747	0	0	0	0	0	0	4.84529	6.71007	0	0	0	0	0	0	0
0	4.6344	11.5941	0	0	6.00515	0	3.31224	2.31786	2.58514	2.92588	3.1098	0	0	18.936	0	0	4.04787	0	0	0	0	0	0	6.38848	0	0	0	5.51907	9.79545	3.12807	8.68687	0	0	0	0	37.4102	0	8.33999	0	0	7.76268	0	0	0	0	0	0	0	0
0	0	0	0	0	0	0	0	0	0	0	0	0	0	0	0	0	0	0	0	0	8.78128	0	0	0	2.05345	0	0	0	0	0	0	0	0	0	0	2.62553	0	0	0	0	0	0	0	0	0	0	0	0	0
0	0	0	10.2725	0	0	0	0	0	0	0	0	0	0	0	0	0	0	0	0	0	19.701	0	0	0	0	0	0	0	0	0	0	0	0	20.7079	0	0	0	0	0	0	0	13.1993	0	0	0	19.6562	0	10.2085	0
28.1531	73.8324	58.1704	29.311	37.2013	67.3926	11.4967	0	86.0303	0	33.3333	0	33.3333	44.0324	0	0	0	77.8008	0	49.9551	0	29.0969	0	48.6628	0	51.5933	0	0	49.3744	78.5007	0	41.6982	0	0	0	32.4195	0	23.2452	0	0	8.69782	0	48.0311	0	0	0	0	10.5459	11.4456	57.5794
0	0	0	0	0	0	0	0	0	33.3333	61.8136	30.2235	33.3333	0	0	57.5657	0	0	32.0566	0	0	18.8854	61.5989	25.8716	29.3975	0	53.4918	63.41	27.8143	0	28.8879	24.6465	81.0588	82.7551	16.0712	0	8.91789	26.1952	38.2471	60.8396	57.8635	25.5707	0	46.4508	98.2153	59.9137	27.6195	0	12.6569	0
61.6948	20.5653	25.3867	56.3942	45.4555	17.6582	85.9557	77.446	0	64.0815	0	62.4818	30.4173	45.748	29.3453	33.3333	95.903	18.1514	62.7078	39.2956	87.0856	0	33.3333	0	56.5156	40.2055	31.2709	31.5751	0	0	61.9048	0	0	0	23.7658	67.2854	37.4057	0	24.5118	31.9369	9.00826	28.488	3.99915	24.8958	0	29.8031	0	30.0662	18.538	0
24.5732	18.6926	23.3067	21.3159	0	0	0	0	33.3333	0	0	0	0	0	57.2229	0	0	21.8666	0	0	0	52.5013	0	0	0	25.5259	0	0	0	83.2032	0	20.125	0	0	0	0	0	24.1213	0	0	0	0	0	0	0	0	26.3834	14.7914	0	6.15294
0	0	13.2752	0	10.4093	0	0	0	20.5269	0	16.7969	0	0	0	0	30.9729	0	0	0	0	0	24.9207	0	46.5039	0	0	58.0388	0	6.88103	0	0	0	58.6436	26.8673	0	0	32.0052	0	66.6667	0	26.0684	14.8401	8.55097	22.0393	0	0	22.9309	0	0	0
0	0	0	0	0	0	33.3333	59.6264	33.3333	20.0294	0	0	0	26.4891	0	33.3333	0	0	0	0	0	0	0	27.2089	19.7369	0	0	0	0	0	0	19.3448	0	33.3333	65.4364	25.0757	0	39.0994	22.0117	33.3333	0	0	9.11296	0	0	33.3333	0	9.02913	11.9792	0
0	0	0	10.704	0	0	0	0	0	0	0	0	0	0	0	0	0	0	0	0	15.4129	0	0	0	0	0	0	0	0	0	0	13.2083	0	21.0278	0	0	0	0	0	0	33.3333	0	33.3333	33.3333	0	52.0996	0	0	11.4504	37.8579
41.7461	14.6408	0	33.3333	0	0	0	0	0	33.3333	0	0	0	33.3333	0	0	0	0	0	33.3333	33.3333	0	22.7671	0	0	0	0	0	22.1013	11.4244	0	0	33.3333	0	0	16.6667	14.1922	9.21201	0	33.3333	0	33.3333	0	0	0	0	17.0924	51.8753	0	22.056
0	0	24.5099	0	0	0	0	0	0	0	16.5365	0	33.3333	33.3333	0	0	0	33.3333	0	0	30.4308	0	66.6667	0	33.3333	0	0	33.3333	6.31297	0	21.2843	19.7256	0	6.46604	0	0	0	20.1069	0	0	0	6.84173	9.54608	0	0	14.5671	10.4024	0	33.3333	0
0	0	33.3333	0	33.3333	33.3333	0	0	0	13.304	0	66.6667	0	0	39.1312	0	0	0	0	0	0	0	0	10.6806	0	0	8.62786	33.3333	33.3333	3.1151	14.8522	0	0	0	0	0	0	7.46037	0	0	33.3333	0	0	0	0	0	6.94995	0	0	9.62871
17.4523	0	0	1.31342	0	33.3333	33.3333	13.2155	0	0	33.3333	0	33.3333	6.84425	0	0	100	44.8001	0	0	0	8.93276	0	6.12444	13.5964	33.3333	0	0	0	0	0	13.9885	8.0231	12.3056	16.7432	33.3333	7.39176	0	11.3217	0	0	0	0	44.6273	0	0	0	24.3042	21.883	0
16.2284	0	0	0	22.924	0	0	0	0	0	0	33.3333	33.3333	0	3.64583	0	0	0	0	0	20.8229	13.6452	0	9.48213	0	41.1407	0	0	0	2.25725	18.4812	13.6078	0	0	0	8.25767	46.4108	0	0	0	7.26496	44.9848	14.6743	0	0	0	0	0	21.3542	11.2774
0	0	5.57493	0	0	0	0	27.1581	12.8064	33.3333	33.3333	0	0	0	0	2.36043	0	0	0	0	0	0	10.5662	0	0	0	33.3333	0	31.3714	0	12.049	0	0	0	17.8205	16.6667	0	0	0	0	0	0	24.7824	0	33.3333	0	16.241	0	0	13.0272
0	2.17261	3.48131	5.41646	0	2.0079	7.54099	0	9.88482	5.33632	9.48148	10.5439	4.38108	2.19603	5.36719	0	0	0	4.90959	4.61783	1.41284	0	2.82666	0	6.86681	0	11.1522	8.64177	0	0	0	0	8.80925	42.6563	37.2878	0	0	20.1305	32.2669	11.6944	14.3439	27.4717	5.63657	20.4861	4.90277	4.25293	23.9504	16.0543	5.63291	0
0	0	3.89722	1.10847	4.49811	5.55807	0	14.3094	0	0	0	0	0	4.62493	0	5.30907	0	0	0	0	3.20298	33.3333	7.76797	0	0	2.51822	7.93103	14.2137	0	6.20453	0	27.6726	9.08839	0	0	0	33.3333	29.4762	11.4433	0	0	0	0	17.5735	0	0	4.64434	11.8667	0.851325	16.6271
3.07376	0.546258	6.49573	0	6.38466	6.06198	0	12.249	0	0	0	18.8568	3.72839	0	0	0	0	0	1.78954	6.77594	0	2.99457	0	5.69261	0	0	10.0284	0	28.6555	0	4.39425	26.0368	0	0	0	3.68407	18.9758	0	0	15.818	0	0	9.64026	0	0	7.97762	0	0	0	18.6672
0	0	0	0	0	2.6516	4.14368	0	0	8.65721	0	0	0	8.55259	4.70347	0	0	7.81636	0	5.75966	0	18.242	0	10.2372	3.5245	5.74446	0	1.40344	0	1.43321	0	0	0	0	0	2.36308	21.1179	18.4042	0	0	8.55233	2.58441	0	2.1727	3.26996	0	0	4.24458	0	0
0	6.63029	5.35868	4.1691	4.26396	0	0	0	0	0	4.70967	0	8.88966	0	0	1.8791	34.1888	0	2.66485	0	7.36302	0	12.5942	0	13.203	6.91376	3.1595	0	2.87766	0	9.15108	0	7.4167	0	0	0	0	0	0	0	0	15.213	0	7.07763	0	0	23.0412	0	55.9788	0
3.65941	3.61169	0	3.1302	4.39748	0	3.7738	0	4.71929	0	2.95598	0	0	0	3.21965	3.92655	0	0	17.1459	0	6.30982	0	0	3.53774	0	0	0	5.10107	0	0	3.88442	7.29656	0	9.16887	0	0	0	0	2.93802	0	7.5502	0	18.75	0	1.11169	1.58766	0	0	0	0
4.87973	0	0	0	0	0	0	0	0	0	0	0	4.52265	0	0	0	0	0	0	0	0	0	0	0	0	0	0	0	0	0	0	0	0	0	9.37287	0	0	15.8236	0	0	0	0	0	0	0	0	0	0	0	0
0	0	0	0	47.1225	0	0	0	0	0	0	0	0	0	0	0	0	31.0292	0	0	30.1304	0	0	0	0	57.0767	19.0216	0	0	32.6151	24.8392	21.9894	0	0	0	0	0	0	0	0	0	28.6915	0	0	0	0	0	0	12.9103	64.7057
58.7132	87.0392	50.915	28.675	0	83.7205	56.7249	73.4416	85.3959	58.6118	52.4755	47.8099	78.4782	55.918	56.7392	88.8853	65.8112	61.1545	73.4901	56.2892	51.581	15.0914	76.8112	0	53.9327	27.7468	23.3049	70.64	38.0111	59.7472	29.4489	17.0047	50.1616	48.1748	53.3393	93.9529	12.2155	0	53.3518	44.9689	69.5536	26.0393	33.3333	52.6901	60.6522	86.1818	0	29.0888	18.8188	0
29.6739	0	29.852	57.5008	33.3333	0	27.8166	0	0	27.3947	30.3773	22.7894	0	28.7084	29.9705	0	0	0	0	26.5574	0	30.3388	0	80.5325	22.473	0	25.4023	0	30.4557	0	28.2822	0	24.5241	0	0	0	14.3575	16.1655	0	27.5186	0	0	32.6398	0	30.0634	0	48.364	38.7457	5.80781	0
0	0	0	0	63.0777	0	0	0	0	0	0	0	0	0	0	0	0	33.3333	0	0	16.1793	55.8563	0	0	0	58.0009	28.1403	0	0	20.4853	33.3333	29.3961	0	33.3333	0	0	21.6243	0	0	0	0	19.3973	0	0	0	0	22.0064	0	0	0
0	0	0	0	0	0	0	0	0	0	0	0	18.3359	0	0	0	0	33.3333	15.3846	0	0	0	0	0	0	0	0	33.3333	0	0	0	0	0	0	24.2877	33.3333	12.133	13.2378	0	48.4334	35.5911	0	33.3333	33.3333	0	0	0	0	0	0
0	0	0	0	0	0	0	0	0	0	0	0	0	0	0	0	0	0	0	33.3333	0	0	0	0	33.3333	0	23.8053	0	0	31.1074	0	25.745	33.3333	0	0	0	33.3333	0	16.6056	0	33.3333	10.3494	0	22.5175	0	0	0	0	14.1897	0
0	0	0	0	0	0	24.8205	36.1878	0	0	0	0	0	33.3333	0	0	0	0	20.7273	0	37.1929	10.8103	0	33.3333	0	0	0	0	12.8628	0	0	0	0	0	0	0	0	0	0	0	0	23.1731	0	24.1534	0	0	0	21.3933	20.4635	57.2482
0	33.3333	0	0	0	0	33.3333	0	0	0	0	0	0	0	0	0	0	0	0	33.3333	0	0	0	0	0	8.6658	0	33.3333	0	0	0	0	0	57.8598	66.6667	0	0	73.9509	33.3333	0	14.8676	13.936	66.6667	0	0	0	0	12.0902	0	0
20.0324	0	9.43953	0	3.58894	0	17.0998	0	66.6667	0	0	0	33.3333	0	0	33.3333	0	0	17.9487	33.3333	0	0	66.6667	0	0	33.3333	33.3333	0	33.3333	7.14237	0	0	0	0	0	0	0	0	33.3333	18.2333	0	13.9611	0	0	0	0	11.327	33.3333	0	33.3333
0	0	66.6667	0	0	33.3333	8.51282	0	0	33.3333	33.3333	33.3333	14.9975	0	0	0	0	0	0	0	0	0	0	0	0	0	5.193	0	41.6208	0	0	33.3333	0	0	0	0	21.2003	0	16.7277	0	0	0	0	10.8158	0	33.3333	0	0	0	9.41851
33.3333	0	0	0	0	0	0	13.8122	0	0	33.3333	66.6667	0	33.3333	0	33.3333	0	0	45.9393	0	33.3333	0	0	0	0	0	9.52802	0	0	0	0	9.27866	33.3333	0	9.04558	0	0	12.8113	0	0	8.52391	0	0	9.17989	0	0	33.3333	21.2431	19.1436	0
0	0	0	33.3333	0	0	0	50	0	0	0	0	0	0	0	0	0	0	0	0	13.2945	0	0	0	33.3333	0	0	0	0	4.28268	33.3333	0	0	8.80686	0	0	0	0	0	0	0	10.1602	0	0	0	0	0	0	46.2032	0
13.3009	0	23.8938	0	0	0	16.2336	0	33.3333	33.3333	0	0	0	0	0	0	100	33.3333	0	0	0	33.3333	0	33.3333	0	0	0	33.3333	12.183	3.6489	0	2.24689	0	0	0	0	11.709	0	0	0	7.68398	9.02285	0	0	0	0	0	11.94	0	0
2.80216	1.30702	9.83057	1.68379	0	34.0976	11.7279	0	3.41442	5.33667	0	11.0228	17.4811	7.58181	5.55615	15.3193	0	2.12258	0	5.47136	2.60649	6.02172	21.0622	23.8436	29.0301	5.03377	11.2353	13.8399	0	1.08177	5.20455	9.10811	31.8346	8.90778	18.6007	28.3503	10.3035	25.466	40.1725	30.4827	13.6497	0	24.5523	23.494	0	36.0184	33.3333	0	39.5723	10.825
2.31506	2.90539	0	8.98417	8.14736	0	21.1434	34.9668	0	13.4194	4.08835	0	7.90158	5.68333	10.1218	17.6801	0	0	11.9274	5.09108	33.3333	0	14.5655	0	0	0	14.3499	0	25.617	0	10.0296	12.0038	17.1843	41.6091	24.4431	25.1091	18.8332	22.5196	0	33.3333	0	13.1789	0	0	22.883	0	17.0334	0	0	17.9345
0	5.28124	0	0	7.00212	4.06742	0	0	32.144	0	12.5724	10.8246	4.95293	3.68556	7.72789	0	21.0622	2.12621	8.9819	6.87336	0	14.5345	0	0	0	2.61573	9.46292	9.72914	0	0	0	0	0	0	0	0	0	0	26.5836	0	9.6206	0	21.8862	14.6464	41.0079	23.2695	0	24.2074	0	16.9894
0	0	6.138	1.81379	1.40743	3.46563	0	0	0	13.9161	0	14.2371	0	0	0	0	0	2.5073	9.52769	7.93503	18.8404	3.67251	0	7.79412	0	3.42707	19.3736	6.19064	0	1.49993	0	21.3859	3.48206	0	15.9089	0	0	5.75728	0	8.58764	18.0935	44.203	13.4942	10.7781	0	0	33.3333	26.9246	0	0
1.89186	0	9.5636	2.09024	0	0	2.49471	0	0	0	0	0	9.60202	0	0	0	0	0	0	0	0	0	2.24219	5.62105	14.8934	2.76314	0	6.30553	0	0	4.61653	12.3019	14.2634	0	0	6.17533	0	6.64749	0	3.85738	1.86064	0	12.1166	12.7342	0	12.0552	0	0	32.8654	22.5083
0	0	0	0	0	0	1.321	0	0	5.13863	0	0	0	4.7544	0	0	13.0155	0	0	2.18595	0	5.23208	13.4683	0	0	0	5.42106	8.97866	0	0	0	6.18723	0	14.2284	0	0	43.2484	0	0	0	0	6.51223	0	18.687	0	0	16.2999	0	0	12.0821
0	2.78855	4.26913	0	1.77001	0	0	9.54856	0	0	0	3.03514	0	5.12013	3.8715	0	0	1.09141	0	2.28206	0	0	0	0	7.14912	0	6.94326	0	33.3333	4.6923	21.0663	0	7.81038	0	0	16.9018	14.5001	28.9034	14.5622	0	0	0	0	0	0	0	0	24.3135	0	15.3988
0	0	0	0	0	0	0	0	0	0	0	0	0	0	0	0	0	0	0	0	0	0	0	0	0	0	0	0	0	0	0	0	0	2.81654	8.89021	0	0	0	6.74969	0	0	0	0	0	25.797	12.0702	0	9.12591	0	0
0	0	0	55.5923	0	0	14.7483	32.9334	23.4471	39.3312	29.245	19.0962	0	27.65	0	21.3723	0	0	45.2116	0	0	0	0	15.8329	14.9662	0	33.214	17.2987	20.3057	0	0	39.013	8.33869	12.5252	32.1571	0	0	10.7063	11.9319	23.739	23.7127	13.6422	27.9507	19.6604	0	0	0	15.4285	12.9736	0
92.9909	87.7178	70.1987	29.8357	81.6731	58.3693	48.5647	22.5513	40.9945	22.858	54.0943	41.7842	60.0623	45.5248	72.7227	45.6284	65.9223	92.1525	24.3514	70.1612	45.2198	70.5392	48.6617	46.9084	33.9612	86.1603	0	37.6575	20.744	92.726	59.0831	0	17.0866	19.9129	0	23.4635	13.1148	0	0	0	33.0628	22.4637	0	0	10.3121	16.5867	0	0	14.5887	4.26188
0	0	0	0	0	22.9933	0	0	0	0	0	0	0	0	0	0	0	0	0	0	33.3333	0	0	0	0	0	0	0	0	0	0	0	0	0	0	51.0207	0	10.1015	0	0	0	0	21.6639	0	33.3333	0	43.7306	0	0	0
0	0	18.5258	0	0	0	22.5089	0	0	49.2395	0	0	28.6443	0	0	0	0	0	0	0	0	0	33.3333	27.9205	33.3333	0	11.6927	33.3333	8.8633	0	0	33.3333	23.2745	0	0	0	0	0	0	12.5832	0	16.7263	19.8904	0	0	0	0	17.2251	0	0
0	0	0	33.3333	0	0	33.3333	37.5782	37.8539	0	0	33.3333	0	0	0	0	0	0	57.118	24.7857	33.3333	0	13.9433	0	0	0	0	33.3333	0	0	0	19.0073	0	27.2161	12.2782	33.3333	46.7522	0	33.3333	0	0	29.1958	24.287	0	66.6667	11.8301	11.4815	21.7225	51.4777	17.8611
0	0	0	0	0	0	0	50	33.3333	33.3333	0	0	0	0	0	66.6667	0	33.3333	0	33.3333	0	49.7399	33.3333	0	33.3333	0	33.3333	33.3333	0	0	23.814	0	50.8264	0	28.0095	0	0	0	33.3333	66.6667	26.8352	0	0	33.3333	0	33.3333	27.6221	18.5744	0	0
0	33.3333	0	0	19.9699	33.3333	0	0	0	17.4272	33.3333	66.6667	19.9165	0	33.3333	0	100	0	0	0	0	0	0	33.3333	0	33.3333	54.974	0	39.4097	0	0	33.3333	0	33.3333	14.9906	15.6459	26.9354	15.0411	33.3333	20.7501	0	0	17.8539	58.3231	0	21.5032	0	0	30.4264	0
0	0	0	0	0	33.3333	44.1577	0	16.5011	0	0	0	18.1058	0	33.3333	0	0	0	0	0	0	0	8.07834	5.41284	0	0	0	0	0	0	0	0	10.0588	33.3333	21.0552	0	0	23.2318	0	0	15.8706	49.9404	0	0	0	33.3333	0	16.1082	0	40.6965
0	0	0	0	0	0	0	0	12.3117	0	0	0	33.3333	33.3333	0	0	0	0	9.54869	8.5476	0	16.9267	0	0	0	33.3333	0	0	0	33.3333	33.3333	14.326	15.8403	6.1172	18.3427	0	19.9144	33.3333	0	0	0	0	9.04634	8.34353	0	0	8.05919	0	0	0
33.3333	0	0	33.3333	46.6968	10.34	0	0	0	0	0	0	0	0	0	0	0	0	0	0	0	0	11.3117	0	0	0	0	0	36.1817	0	0	0	0	0	5.32387	0	6.39798	0	0	0	0	4.13753	7.25851	0	0	0	0	0	15.189	24.065
0	0	0	0	0	0	0	0	0	0	33.3333	0	0	0	0	0	0	0	0	0	0	0	0	0	0	0	0	0	0	0	0	0	0	0	0	0	0	18.2923	0	0	39.8315	0	0	0	0	0	5.71124	0	0	0
0	0	14.8076	0	0	0	0	12.4218	0	0	33.3333	0	0	0	0	0	0	0	0	0	0	0	0	0	0	0	0	0	15.5453	0	9.51931	0	0	0	0	0	0	0	0	0	17.4627	0	0	0	0	0	3.39543	26.3699	2.90698	17.3774
7.73597	14.5114	8.41374	18.8728	23.4705	23.271	41.7317	0	9.52632	0	0	11.4148	0	11.9231	15.4218	0	0	0	0	48.1458	0	0	0	0	38.0089	0	43.8892	0	0	0	0	6.41531	24.8331	4.15137	40.6799	4.10905	0	12.0437	57.9714	56.0198	0	8.7525	0	27.2673	7.62583	32.8335	0	0	0	0
52.5008	37.9909	0	22.3099	46.3861	22.0922	11.1512	0	41.692	22.9161	0	37.9894	43.9892	21.8377	35.218	48.2603	54.2712	46.7692	28.7892	22.0405	24.9188	0	19.5895	27.9433	25.2468	16.3103	21.143	48.5629	0	24.8908	0	36.5233	33.9348	29.6016	23.6326	24.1445	0	22.466	33.3333	0	26.1647	0	0	0	27.6967	23.9095	16.7758	0	0	0
9.00611	0	60.044	21.3938	0	25.767	0	64.6699	9.12281	44.064	30.1657	10.2593	33.3333	19.7417	0	21.118	0	17.3025	28.9532	0	42.04	51.6443	44.9205	7.11553	0	43.7046	0	22.9098	47.408	43.202	12.4458	0	0	46.2026	0	28.8711	17.0499	0	0	0	0	50.8294	43.2089	66.6667	40.7507	0	0	8.87945	10.0206	45.5757
0	0	0	0	0	0	14.9313	0	0	0	33.3333	0	0	8.54937	0	0	0	0	0	0	0	0	0	0	0	0	0	0	0	0	51.8973	12.9183	0	0	0	0	33.3333	0	0	19.4772	29.6326	0	0	0	0	0	0	0	42.0231	33.3333
0	0	0	0	0	0	9.80103	0	0	9.15998	0	0	0	0	0	0	0	0	0	0	0	0	0	11.4512	13.8497	0	15.973	0	33.3333	0	20.8876	0	0	0	0	0	17.3134	11.7228	0	0	0	24.5808	0	0	0	12.162	28.0353	28.7505	0	0
5.00768	14.5256	3.71345	4.63817	4.48293	18.8074	0	0	17.2188	0	0	20.0959	0	0	23.049	0	45.7288	0	28.0308	9.5475	0	0	13.7439	31.9955	17.8932	5.04833	0	0	0	0	0	15.0969	32.7319	0	12.9521	9.25853	0	0	0	3.96565	0	0	13.6406	0	0	3.0156	0	13.1171	0	0
0	0	2.77605	0	9.86284	10.0623	0	0	14.6842	10.4173	6.94055	15.099	22.6775	0	7.83176	0	0	0	0	6.31411	4.2149	21.6052	13.7369	0	0	0	6.80441	0	12.5958	0	0	0	0	0	0	0	0	0	8.69522	0	0	10.5907	0	0	1.75729	9.4238	33.3333	24.4539	0	0
0	0	11.3158	0	0	0	22.3847	12.7741	7.75591	0	0	0	0	13.5917	8.39966	14.6467	0	0	0	11.2928	8.41458	14.7562	8.00932	14.7666	0	0	0	0	0	0	0	0	8.50028	0	0	12.9503	32.3033	33.3333	0	4.04447	0	5.24658	19.2849	0	12.7267	10.8359	0	0	47.9563	0
25.7494	32.9721	13.737	32.7854	15.7976	0	0	22.556	0	13.4427	29.5604	5.14161	0	24.3564	0	15.975	0	35.9283	14.2269	0	20.4118	11.9944	0	6.72783	5.00134	34.9368	12.1903	28.5273	0	31.9072	14.7694	13.9997	0	20.0445	22.7354	9.1888	0	20.4341	0	16.4929	44.2027	0	23.8656	6.06607	9.4428	7.81963	21.8555	24.799	0	21.0909
0	0	0	0	0	0	0	0	0	0	0	0	0	0	10.0798	0	0	0	0	2.65921	0	0	0	0	0	0	0	0	6.66284	0	0	15.0464	0	0	0	11.4777	0	0	0	0	0	0	0	0	0	0	0	0	0	0
0	0	0	0	0	0	0	0	0	0	0	0	0	0	0	0	0	0	0	0	0	0	0	0	0	0	0	0	0	0	0	0	0	0	0	0	0	0	0	0	0	0	0	0	0	0	0	0	9.58371	0
12.2152	13.3961	0	0	0	0	0	0	0	0	0	0	0	0	0	0	0	14.5368	0	0	0	0	0	0	0	0	0	0	0	0	0	7.07589	0	0	0	0	0	0	0	0	0	3.85819	0	0	0	0	0	0	0	0
66.6667	33.3333	11.9656	45.9105	0	60.5089	0	0	0	0	0	19.6726	0	0	12.9565	33.3333	0	40.6283	18.1169	26.0901	32.9945	100	0	9.63518	0	71.7183	13.4103	18.5215	0	93.2511	82.2246	0	20.2578	0	5.79841	0	17.5384	1.565	0	0	0	12.7481	21.575	0	0	0	38.2415	0	5.27256	3.52512
0	0	0	0	33.3333	0	0	0	0	20.9762	33.3333	0	0	23.9678	0	0	0	0	0	21.0576	0	0	0	58.5029	0	0	0	17.6548	29.6155	0	0	0	0	0	0	33.3333	0	0	14.3041	21.1434	16.6052	37.5917	0	0	0	0	0	59.3777	0	0
0	53.2705	88.0344	54.0895	66.6667	0	59.5142	40.6412	52.6483	33.3333	49.6005	33.3333	100	54.3323	87.0435	58.9485	0	18.6879	48.5497	33.3333	44.8805	0	98.4395	18.6233	32.7187	28.2817	0	9.57359	21.3443	0	17.7754	37.7755	33.3333	41.9156	0	59.4835	33.3333	0	0	0	19.2989	13.4029	45.3673	19.277	66.6667	14.243	24.4903	0	28.7541	13.7827
21.1182	0	0	0	0	33.3333	0	50	22.6848	12.3572	0	33.3333	0	0	0	0	100	18.7965	33.3333	0	16.1754	0	0	0	22.6717	0	25.5327	14.8118	16.8682	6.74891	0	0	22.6027	0	9.08065	0	0	15.3655	0	0	0	0	25.4059	33.3333	33.3333	66.6667	9.98404	0	33.3333	33.3333
0	0	0	0	0	6.15776	33.3333	0	0	20.9777	17.0661	0	0	0	0	0	0	7.35053	0	19.519	0	0	0	0	17.4332	0	45.7186	23.7597	0	0	0	23.2135	0	33.3333	0	0	33.3333	0	33.3333	33.3333	50.0615	0	0	0	0	19.0903	0	0	0	0
0	0	0	0	0	0	7.1525	9.35884	0	0	0	0	0	9.36553	0	7.71815	0	0	0	0	5.94969	0	1.56048	8.16381	0	0	0	15.6785	3.71779	0	0	0	13.0756	8.4526	24.2527	0	0	66.6667	33.3333	45.5233	0	32.3991	0	47.3897	0	0	0	5.36413	0	19.5506
0	0	0	0	0	0	0	0	0	0	0	0	0	0	0	0	0	0	0	0	0	0	0	5.0749	0	0	0	0	16.4651	0	0	0	0	0	60.8683	0	15.795	16.4029	19.0293	0	14.0345	0	7.6518	0	0	0	0	0	23.0563	29.8082
0	0	0	0	0	0	0	0	24.6668	12.3556	0	13.6607	0	12.3344	0	0	0	0	0	0	0	0	0	0	27.1764	0	15.3385	0	11.9891	0	0	31.935	10.7307	16.2984	0	7.18316	0	0	0	0	0	0	0	0	0	0	27.2841	35.2582	0	0
0	51.8803	22.1799	39.7505	0	25.8717	22.5403	50	20.5151	18.3082	7.99347	1.55633	54.8041	5.58596	28.9219	0	0	66.9931	50.2995	20.0901	19.6449	24.5041	79.6041	9.43698	17.7118	40.4139	0	45.0479	18.6791	15.0137	4.15975	0	5.42249	33.3333	0	28.0734	24.2226	0	19.4978	49.5519	12.4784	9.68992	0	66.6667	45.0578	63.3431	0	0	23.1596	33.3333
37.212	0	9.75108	26.024	74.0251	14.7289	21.4422	35.6361	0	0	43.5243	16.1011	0	27.3419	23.9482	41.0669	100	0	0	21.8311	38.5322	0	0	0	0	7.39262	0	0	14.2627	44.5969	10.9239	0	20.971	33.3333	0	0	0	0	0	0	22.8402	20.8774	5.23205	0	23.8388	33.3333	13.1646	20.155	0	30.8421
24.3551	0	33.3333	0	0	0	17.148	0	0	8.1916	0	0	0	19.729	0	23.7736	0	0	0	10.1331	0	0	0	31.6276	0	0	0	33.3333	33.3333	0	25.1572	0	10.479	0	45.0229	18.3613	0	58.3325	33.3333	0	0	6.67859	0	0.529101	0	0	0	0	31.1219	0
0	12.1234	7.11039	0	0	33.7842	0	0	21.0922	0	25.3399	9.76771	5.47547	0	37.7448	0	0	8.6519	5.65685	19.4998	13.6885	0	0	0	26.036	0	71.1415	0	0	3.91455	10.8143	33.7699	8.92704	0	0	12.7351	0	0	0	33.3333	0	0	0	0	0	0	26.3377	21.3447	0	25.6142
16.5317	15.0816	0	0	0	0	0	0	0	15.9089	0	23.8733	0	0	0	0	0	4.62277	27.1432	0	7.63625	0	0	0	0	11.7235	0	8.806	9.23633	0	1.58882	0	0	0	0	0	16.5316	0	0	0	33.3333	13.1805	12.2426	32.8042	10.7007	0	0	13.7086	23.3754	0
0	6.75633	0	0	5.90502	0	7.29904	0	33.3333	16.5376	0	17.2322	0	33.3333	9.38511	0	0	6.69779	0	0	0	14.1314	6.43275	0	15.6215	7.81872	0	0	13.7587	0	0	33.3333	17.4318	0	0	17.1422	23.6035	20.6462	13.8355	0	0	0	27.5289	0	0	0	20.1687	0	0	0
0	0	27.6253	25.2135	0	18.6045	0	4.17318	12.8182	19.1137	0	0	39.7204	8.01842	0	25.5998	0	0	0	28.4458	0	24.7958	0	0	33.3333	0	0	0	0	0	0	0	0	0	21.6438	14.9721	0	0	33.3333	0	31.348	37.1677	0	0	0	0	0	8.3687	22.343	10.2104
0	0	0	0	0	7.01075	22.6842	0	0	0	12.656	22.0093	0	0	0	9.55975	0	13.0344	0	0	0	17.3668	13.9631	35.039	0	0	14.7519	5.51788	5.41796	12.219	0	32.8968	36.7686	0	0	0	25.4211	0	0	10.9375	0	0	15.0634	0	0	0	19.6878	0	0	0
12.923	3.47288	0	9.01192	20.0699	0	0	10.1907	12.2412	16.7957	10.4864	9.46003	0	5.99143	0	0	0	0	16.9005	0	8.71233	19.2019	0	23.8964	0	32.6513	14.1066	7.29486	0	24.2559	39.1798	0	0	0	0	8.71597	10.2212	9.41039	0	6.17723	0	0	39.9331	0	10.9082	0	20.6412	36.4229	0	0
8.97822	10.6855	0	0	0	0	8.88634	0	0	5.14419	0	0	0	0	0	0	0	0	0	0	11.7858	0	0	0	7.29735	0	0	0	5.31196	0	8.1761	0	0	0	33.3333	0	0	11.6109	0	0	0	12.4059	0	0	9.49451	3.3236	0	0	0	0
0	0	7.66312	0	0	0	3.37038	0	0	0	0	0	0	0	0	0	0	0	0	0	0	0	0	0	2.89107	0	5.78931	0	0	0	0	8.25815	11.9881	0	0	0	0	0	0	0	0	0	0	0	0	0	9.6456	0	11.9634	26.8901
0	0	0	0	0	0	0	0	4.9049	0	4.04875	11.8996	0	7.33374	0	1.12534	0	1.59417	0	3.02102	0	6.39133	5.17093	0	1.75397	0	0	0	0	0	11.0392	0	0	0	0	0	0	5.54371	0	0	3.93538	0	0	0	0	0	4.41873	0	0	3.99713
3.76999	0	0	2.72454	7.96217	0	1.51787	0	0	2.53291	0	0	3.18524	0	0	3.10823	12.6246	0	6.59405	6.88554	3.01035	2.86243	4.75708	0	2.30712	0	4.5625	0	4.156	2.22431	0	0	0	3.40542	11.327	4.06186	3.94272	0	0	0	3.86162	2.63031	0	6.05336	0	0	0	10.6745	10.7862	0
0	0	0	0	0	0	0	0	0	0	0	0	0	0	0	0	0	0	0	0	0	0	0	0	0	0	0	0	0	0	0	9.93191	0	0	0	0	0	0	0	0	0	0	0	0	0	0	0	0	0	0
0	0	0	0	0	0	0	0	0	0	0	0	0	0	0	0	0	0	0	0	0	8.53442	0	0	0	0	0	0	6.06765	0	0	0	0	0	5.18155	0	3.74292	0	0	9.14739	0	0	0	0	0	0	9.55979	0	0	8.10779
0	53.666	51.7117	19.9711	11.4025	13.2264	0	0	10.27	0	24.7178	10.3269	6.04029	18.402	0	0	0	66.1441	0	20.3667	16.8542	40.8822	6.01252	45.6684	0	69.3107	0	0	0	31.722	22.7494	0	0	0	7.29251	16.0361	33.3333	0	0	0	0	33.3333	0	0	0	0	0	0	0	4.53235
0	0	0	0	0	33.3333	33.3333	0	0	0	62.6179	0	0	0	0	0	0	0	0	0	0	0	0	0	0	0	0	0	0	33.3333	33.3333	0	0	0	0	0	0	0	0	0	0	0	66.6667	0	0	0	0	0	43.9171	13.5457
66.6667	34.0904	15.063	63.9421	70.1589	53.4403	61.7784	50	61.7618	51.7111	0	33.3333	40.7695	54.7519	100	63.5584	87.3754	32.2617	33.3333	30.3123	80.1355	21.9365	60.5604	54.3316	62.0216	13.1894	89.6482	66.6667	29.1773	19.1489	12.749	36.0784	28.924	33.3333	28.1518	79.902	16.911	33.3333	0	57.5193	0	0	0	33.3333	66.6667	0	28.9146	0	0	0
0	0	25.5621	0	0	0	0	50	23.0634	0	0	14.122	33.3333	0	0	32.208	0	0	60.0726	31.7617	0	0	23.4991	0	0	0	0	33.3333	60.599	0	20.1291	33.3333	59.0878	63.2612	48.0472	0	0	61.123	100	33.3333	92.203	33.3333	33.3333	60.6133	33.3333	33.3333	21.6833	55.9921	33.3333	21.2284
29.5633	12.2436	0	13.3622	10.4764	0	0	0	0	45.756	8.61551	30.3181	16.6716	19.5123	0	0	0	0	0	7.65267	0	19.3932	0	0	31.0262	17.4998	0	0	0	13.5714	0	12.3982	0	0	0	0	42.0701	0	0	0	0	30.703	0	0	0	66.6667	25.778	33.3333	0	21.6984
13.8405	53.5314	19.6895	55.4947	3.97262	61.2857	0	0	0	0	0	0	0	0	20.2363	0	0	56.9598	33.3333	0	33.3333	30.6892	9.51294	44.5153	16.5083	13.0879	10.3762	0	0	61.8974	0	17.8817	0	0	0	20.9809	8.15097	0	0	0	0	0	18.8951	0	0	0	0	0	0	0
0	0	0	0	0	33.3333	27.3426	0	45.0455	33.3333	0	0	0	0	33.3333	15.4957	0	17.5542	0	0	0	0	0	17.2361	0	0	28.5714	0	0	0	0	0	33.3333	0	0	18.6302	0	33.3333	0	72.4433	0	18.0601	0	20.8552	66.6667	0	0	0	0	11.2052
33.3333	0	0	0	29.3607	0	0	0	0	0	0	0	0	27.3447	0	0	100	0	0	33.3333	18.6988	0	0	0	0	10.2945	4.07981	0	19.4295	0	33.3333	0	50.8897	33.3333	81.937	0	10.1279	5.33691	0	0	0	0	24.7155	66.6667	0	0	0	25.017	18.1778	0
19.4928	0	19.306	0	0	0	45.2566	0	0	0	15.9015	21.6453	15.7563	0	0	0	0	0	49.0005	0	0	0	23.8204	0	27.1672	20.2454	0	0	12.531	0	0	0	0	0	0	33.3333	0	20.8891	0	27.5567	66.6667	0	28.9775	0	0	16.8479	60.3801	24.312	22.7229	33.3333
0	0	0	0	0	0	0	0	13.4221	0	16.5348	14.1717	0	0	33.3333	13.9809	0	0	0	0	0	0	0	2.03996	0	33.3333	0	33.3333	33.3333	0	0	15.4516	0	33.3333	0	0	0	27.9964	0	0	33.3333	33.3333	0	0	0	0	0	13.5836	20.97	22.1281
0	18.9789	13.6438	33.3333	33.3333	0	0	0	8.19904	33.3333	33.3333	0	33.3333	0	0	0	0	10.5588	0	0	0	8.98482	33.3333	0	0	23.0388	0	41.401	0	0	33.3333	33.3333	0	33.3333	0	0	0	0	0	0	0	0	0	0	0	0	0	8.31629	0	0
0	13.1353	0	0	21.3478	5.38097	0	50	33.3333	33.3333	0	0	24.2221	0	13.097	17.8377	0	9.70684	0	0	0	35.9775	33.3333	16.0972	10.8483	0	41.4749	0	22.2133	33.3333	0	33.3333	15.777	0	18.063	19.6381	0	0	0	0	0	0	0	0	0	0	0	0	15.1556	33.3333
0	0	0	0	0	0	0	0	0	0	34.2304	52.4949	0	0	0	19.3525	0	0	0	0	14.6345	0	0	20.1114	12.1429	0	0	0	0	0	0	0	0	0	0	0	0	12.4442	33.3333	0	0	0	10.6696	0	0	0	0	9.02135	22.9738	0
0	0	14.0273	0	0	0	5.99076	0	0	0	0	11.6881	0	5.98861	0	33.3333	0	0	0	0	33.3333	24.3485	0	0	0	0	0	0	0	4.76926	0	0	0	0	0	0	0	0	0	0	0	33.3333	14.4383	0	0	16.4854	33.3333	0	0	0
0	14.3544	33.3333	11.172	11.9855	0	21.41	0	0	0	0	0	26.6883	33.3333	0	0	0	5.22025	17.6662	0	0	0	0	0	0	0	15.4976	25.2656	12.4928	0	0	0	0	0	0	7.4175	48.3878	0	0	0	0	15.2733	2.30399	12.4781	0	0	6.28655	19.7498	0	0
9.59742	0	7.25052	7.45388	0	0	6.73891	30.1601	2.66132	9.27068	0	18.3565	6.92119	10.5291	11.9556	0	46.5134	0	11.376	8.86564	4.57106	15.2342	5.20909	3.24606	19.2298	0	23.2141	21.3562	21.3866	0	4.81478	9.54278	27.3847	35.3596	46.0872	4.10587	8.88937	17.6713	16.5155	0	19.2836	0	0	0	2.24729	26.0224	19.3546	18.1135	0	34.9343
5.15795	2.49663	11.4929	0	0.575668	17.2398	0	0	0	2.81397	1.30185	0	0	0	9.72274	14.5503	0	1.03298	15.8456	6.30246	0	0	21.9078	1.81718	0	0	0	0	0	1.48142	33.3333	20.1568	16.3924	0	0	0	0	26.0866	16.2036	54.162	16.9032	25.9095	28.5734	27.9639	3.70655	33.3333	0	0	2.39114	0
0	2.84272	7.64386	0	10.7354	0	0	0	0	0	0	0	10.8538	0	0	14.8616	0	0	0	0	0	0	0	0	9.20761	5.61996	33.8907	3.9234	6.93885	0	17.325	3.50521	0	0	0	3.62567	18.6774	0	0	22.4215	0	15.1599	0	18.6484	0	0	15.448	27.3509	27.2132	33.3333
0	0	0	0	0	7.18789	6.56895	0	6.28793	10.7453	10.8237	8.11659	0	0	6.43536	0	0	0	9.13099	7.21701	1.1367	0	1.22948	16.7589	5.74309	0	0	0	10.5309	3.46483	0	0	0	20.8369	4.10448	1.05205	11.3207	0	0	0	2.99579	0	13.3281	0	11.3857	0	0	0	0	15.555
1.44229	5.15017	0	1.94125	1.24749	0	4.85462	12.7689	0	0	1.21901	0	0	17.8243	1.94954	8.19289	0	0	0	0	6.79585	19.5535	0	0	0	0	0	0.453388	0	0	0	8.9051	0	0	8.9403	0	0	7.83339	10.702	0	1.97581	4.94512	0	18.837	0	0	25.4832	10.8925	13.1732	0
0	0	7.75821	4.57891	0	6.29353	0	0	7.61332	0	0	6.43018	7.19616	0	0	0	0	0	0	0	0	0	0	0	4.04766	0	0	0	0	0	1.72111	0	4.30753	0	14.0086	0	18.054	0	0	2.28208	0	20.0956	0	0	1.05745	0	0	0	33.3333	0
0	0	5.59469	2.55754	0	0	0	21.4408	9.42052	0	0	11.5012	0	0	0	0	0	7.2136	5.27678	8.09503	4.9872	2.01747	6.39823	0	4.68478	0	0	0	11.9468	0	8.58934	0	0	0	0	0	4.72637	34.4655	3.44124	0	6.66006	0	20.0053	0	0	0	0	0	0	0
0	0	0	0	0	0	0	0	0	0	0	0	0	0	0	0	0	0	0	0	0	0	0	0	0	0	0	0	0	0	0	0	0	0	0	0	0	0	0	0	0	0	0	0	0	0	0	0	0	0
30.6969	28.1832	60.2599	0	54.6838	48.0354	50.4225	20.8526	20.3913	77.17	55.0769	0	75.0288	71.6466	69.9368	22.4089	0	0	16.6805	50.584	25.3329	0	44.7837	0	14.1035	0	32.776	0	49.1969	0	0	57.8901	51.9154	43.8035	26.8594	0	23.0528	0	53.1377	21.1344	20.888	18.1734	33.3333	34.5507	21.9476	40.6443	21.8289	37.6607	6.12011	16.1773
53.1054	61.3273	0	83.4684	32.7577	21.2433	31.415	14.7776	53.6256	0	31.5785	55.5956	0	0	0	39.9863	53.4866	91.7534	41.6901	18.9358	57.1763	63.1949	20.4717	78.1778	42.9835	94.38	10.1193	74.267	0	95.0537	34.2165	0	0	0	0	91.2164	15.2793	13.9432	0	0	31.2935	15.7165	4.75995	0	59.6554	0	17.8853	5.98243	17.769	0
0	0	0	0	0	0	0	0	0	0	0	0	0	0	0	0	0	0	0	0	0	0	0	0	0	0	0	0	5.11744	0	33.3333	0	0	0	0	0	0	0	0	0	0	0	27.2335	0	0	0	0	0	0	0
18.4997	33.3333	0	0	0	33.3333	19.2857	48.152	0	23.8095	0	33.3333	48.2551	33.3333	66.6667	66.6667	0	0	33.3333	16.1954	0	0	45.6512	0	12.8093	0	0	0	0	0	33.3333	8.03658	13.8525	12.4839	3.7394	0	0	19.1238	0	35.1185	0	0	0	11.65	0	22.8168	33.3333	0	12.9044	14.4325
0	0	0	33.3333	0	0	33.3333	0	47.8025	0	0	0	0	33.3333	0	33.3333	0	0	54.2805	20.8179	0	17.5625	0	0	0	0	0	33.3333	12.7464	0	0	0	33.3333	0	0	0	33.3333	0	0	0	26.1835	47.8301	0	20.935	33.3333	0	16.7768	66.6667	0	25.0812
0	0	60.622	0	0	33.3333	0	32.6508	0	0	0	0	0	33.3333	0	0	100	0	0	0	33.3333	0	0	0	0	0	54.2917	0	2.48552	0	0	66.6667	27.8031	0	33.3333	33.3333	33.3333	19.3341	0	5.71625	53.8326	0	33.3333	33.3333	0	3.26766	0	18.1999	23.6718	0
0	0	33.3333	0	0	0	0	0	0	33.3333	0	33.3333	11.8106	0	0	0	0	0	0	33.3333	0	0	0	0	17.7028	0	0	0	33.3333	0	0	3.91278	19.4808	14.0798	39.0337	0	0	0	66.6667	0	0	33.3333	0	0	33.3333	66.6667	33.3333	0	33.3333	43.9511
0	0	0	0	0	0	14.0476	0	33.3333	9.52381	33.3333	33.3333	18.4116	0	0	0	0	0	0	0	0	24.7965	0	33.3333	0	0	33.3333	33.3333	0	0	0	0	0	66.6667	0	0	0	33.3333	33.3333	23.2327	0	0	0	21.6833	0	7.24884	16.5565	0	9.05125	0
14.8336	0	6.04462	0	33.3333	0	0	0	8.59855	0	0	0	0	0	0	0	0	0	0	29.6533	33.3333	0	45.1929	33.3333	7.70296	33.3333	12.375	0	27.536	0	0	0	0	0	14.2559	0	0	14.2095	0	25.832	19.9838	8.37189	33.3333	0	0	0	0	0	0	16.5352
0	0	0	0	0	33.3333	0	19.1972	0	0	0	0	0	0	0	0	0	0	12.3862	0	0	0	9.15583	0	0	0	0	0	0	0	0	0	0	6.76963	0	0	33.3333	9.26977	0	10.1006	0	10.4646	0	12.3983	0	0	0	15.1334	0	0
0	0	0	0	0	0	0	0	0	0	33.3333	0	0	0	0	0	0	0	0	0	0	0	0	0	15.6305	0	0	0	0	0	0	0	5.53025	0	0	0	0	0	0	0	0	0	6.09986	0	0	0	0	0	9.66149	0
0	0	0	0	0	0	33.3333	0	10.2656	0	0	0	21.5227	0	0	0	0	0	0	0	0	24.3077	0	0	46.1544	0	0	0	18.7813	0	0	21.384	0	0	9.63763	0	0	4.72947	0	0	0	0	0	0	0	0	0	0	11.3777	0
41.7438	50.8529	10.3333	17.6503	26.0269	51.3002	20.89	57.4976	29.0977	15.6326	25.5823	23.3423	14.4427	25.1702	29.7597	0	52.9842	44.6774	0	38.702	60.71	10.9769	16.0996	14.24	18.274	18.1938	37.2689	47.5132	11.2669	30.5416	24.6837	9.69388	24.7705	24.5536	29.6347	71.4948	0	0	54.7523	23.0458	20.029	4.43676	0	35.3948	34.7569	37.7937	5.3535	0	11.2217	18.8214
0	0	0	27.1992	0	0	28.9115	0	0	40.836	17.8747	0	27.0671	17.4371	29.0714	33.3232	0	19.5443	60.3795	0	0	9.43305	7.04914	24.4167	0	0	0	0	26.4889	0	0	18.2493	28.5062	46.5862	13.4698	0	18.2961	27.1165	0	30.7816	53.2259	0	12.5087	22.0238	23.4696	0	23.0294	15.1893	9.23996	19.9898
25.2729	0	26.6855	0	0	0	0	0	0	0	20.9484	0	0	0	0	0	0	0	0	21.4683	0	0	0	0	28.4257	0	0	0	0	29.1426	6.03135	0	0	0	0	0	8.72821	0	0	27.5336	0	30.6266	10.3932	0	0	33.3333	0	26.4287	0	17.735
0	0	56.3334	18.9401	43.5304	12.6962	26.8061	0	18.4081	0	0	33.3333	0	29.1557	0	33.3333	0	0	0	0	0	27.2279	29.213	0	0	37.2452	14.8875	11.7321	0	0	0	0	0	0	0	0	11.3517	0	0	0	0	0	0	0	8.44414	0	0	0	34.9045	0
0	16.9097	0	2.0765	0	0	0	0	0	4.15833	0	25.1912	24.6277	0	4.40725	10.1979	0	0	0	6.76699	0	0	8.9811	8.77839	0	0	12.9594	13.9912	0	12.005	0	27.6691	11.2981	0	20.9393	3.7674	0	11.1707	23.3484	0	0	21.7949	0	20.2857	7.23384	0	17.8194	9.58017	0	0
0	0	0	6.13415	19.2391	0	0	21.3547	20.8266	0	4.41255	0	0	4.93225	10.7989	0	0	0	0	0.746269	10.3436	0	0	9.29667	0	12.0555	16.8275	0	22.0665	0	0	0	2.37797	20.0804	35.9562	4.93416	24.6051	33.3333	0	0	22.576	36.0401	15.0081	0	0	0	0	19.6643	16.3589	7.83724
9.28985	0	0	13.6066	0	0	12.4433	0	16.7423	0	7.75099	18.1332	0	0	0	0	0	13.7891	18.6318	11.865	0	44.5286	20.5931	0	0	0	0	9.11729	33.3333	0	0	0	0	8.77968	0	0	6.33468	0	0	10.2875	0	0	22.9401	0	0	28.873	0	29.1375	0	15.5983
23.6935	10.3299	0	14.3932	0	26.7592	10.9491	0	14.9252	0	12.3849	0	27.5963	0	0	11.5678	47.0158	0	20.9887	12.9709	6.71744	7.8336	0	19.0934	38.2409	8.82831	0	11.5542	6.84447	12.3505	69.285	0	15.5356	0	0	0	21.9816	0	0	2.55178	0	0	25.4119	22.2957	9.75111	0	37.4582	0	20.5404	0
0	21.9075	6.64786	0	11.2036	9.24431	0	21.1477	0	39.373	11.0461	0	6.26624	23.3048	18.367	11.5777	0	21.9893	0	7.48045	8.51399	0	18.0641	24.1749	15.0593	23.6772	12.8882	6.09205	0	15.9603	0	11.0544	17.5115	0	0	19.8036	8.70255	16.3633	21.8992	5.79977	4.16912	0	0	0	16.3445	0	16.3394	0	7.7345	13.3436
0	0	0	0	0	0	0	0	0	0	0	0	0	0	7.59577	0	0	0	0	0	13.7149	0	0	0	0	0	5.16855	0	0	0	0	0	0	0	0	0	0	12.0162	0	0	0	7.1017	13.738	0	0	0	0	0	0	6.67468
0	0	3.78615	0	0	0	4.677	0	6.57956	0	0	0	0	0	0	0	0	0	0	0	0	0	0	0	0	0	0	0	9.13669	0	0	5.05131	0	0	37.4473	0	6.43492	0	0	0	0	0	0	0	0	0	0	6.30271	0	0
0	0	0	0	0	0	3.37349	0	7.2892	0	0	0	0	0	0	0	0	0	0	0	0	5.86491	0	0	0	0	0	0	0	0	0	0	0	0	5.41194	3.29046	0	0	0	0	0	2.05705	3.75124	1.1576	0	0	2.89985	12.0512	0	6.70976
0	0	0	0	0	0	0	0	0	0	0	0	0	0	0	0	0	0	0	0	0	0	0	0	0	0	0	0	0	0	0	0	0	0	0	0	5.26844	16.9137	0	0	0	0	0	0	0	0	0	0	15.9422	0
0	0	0	0	0	0	0	0	0	0	0	0	0	0	0	0	0	0	0	0	0	0	0	0	0	0	0	0	0	0	0	0	0	0	0	0	0	4.19505	0	0	0	11.9322	0	0	0	0	0	0	0	0
48.2392	33.3333	0	28.4101	0	9.04196	0	12.1862	7.97872	11.5885	0	29.3563	9.34153	0	5.36342	0	0	49.5604	0	17.9109	15.2802	26.2667	0	12.7301	0	68.5322	0	0	6.80602	35.9881	19.3354	11.4988	0	4.39682	0	18.0809	0	0	13.4268	0	0	18.5958	15.2516	0	18.009	0	0	0	0	4.62916
0	0	0	53.9181	26.3304	0	0	14.6559	0	0	0	0	0	0	0	24.767	0	0	21.56	0	0	24.3209	0	66.6667	0	0	0	0	0	0	0	0	0	0	6.39067	0	5.2372	11.4402	12.5116	8.35664	7.67773	0	0	0	0	0	63.7668	0	0	14.7368
51.7608	66.6667	96.2139	0	66.6667	90.958	91.9495	37.8138	52.0441	0	55.754	11.4668	66.6667	66.6667	33.3333	33.3333	0	50.4396	33.3333	33.3333	84.7198	16.3287	33.3333	0	0	31.4678	27.072	33.3333	57.53	64.0119	80.6646	50.1165	0	37.3363	0	63.3762	0	0	0	0	13.2931	21.4011	51.2926	33.3333	61.279	33.3333	0	60.364	84.0578	0
0	0	0	0	0	0	0	0	18.0654	88.4115	33.3333	23.7415	0	33.3333	61.3032	33.3333	100	0	0	0	0	0	66.6667	0	33.3333	0	66.6667	33.3333	26.5273	0	0	33.3333	0	0	27.9214	0	0	29.1383	19.9066	0	0	19.8134	18.0818	32.1757	0	0	0	0	0	33.3333
0	0	0	0	0	0	0	0	0	0	0	24.7727	23.9918	0	0	8.56637	0	0	45.1067	21.4338	0	0	0	20.6032	66.6667	0	6.26131	33.3333	0	0	0	0	66.6667	28.9365	22.8287	15.2524	33.3333	38.3128	54.155	91.6434	25.6556	26.2004	0	33.3333	0	33.3333	0	21.2821	0	40.5909
0	0	0	17.6717	7.00298	0	0	35.3441	8.04297	0	10.9127	10.6626	0	0	0	0	0	0	0	27.322	0	27.2189	0	0	0	0	0	0	0	0	0	0	33.3333	29.3303	0	0	49.7261	0	0	0	53.3736	0	11.6228	0	20.712	33.3333	0	0	0	0
75.9133	47.3566	60.7182	19.435	18.3483	46.8881	27.5524	42.3203	0	14.431	12.565	0	18.199	33.3333	19.9706	0	63.1911	59.8668	0	21.5636	42.3858	11.9748	55.5759	36.0243	0	66.6216	0	0	0	47.3352	30.9405	49.2884	0	0	0	0	0	0	33.3333	0	0	2.59091	33.3333	0	44.9462	17.6962	38.3956	27.4117	26.8293	15.7893
0	33.3333	0	0	0	33.3333	0	0	0	0	14.2486	21.1535	0	0	0	0	0	0	54.3839	0	28.7744	0	0	0	7.91836	0	0	0	33.3333	29.7286	0	0	20.5397	0	10.1727	33.3333	13.259	6.78795	0	0	0	0	0	0	0	0	33.3333	11.8048	0	20.0457
0	0	0	33.3333	9.47199	0	0	0	60.199	0	0	33.3333	21.8654	0	0	53.461	0	15.5253	9.78221	0	0	0	0	0	0	0	21.63	0	0	0	23.0057	25.9259	33.3333	0	0	33.3333	38.4872	14.9623	16.8753	21.2819	0	14.0534	0	0	0	33.3333	0	25.5468	0	17.5836
0	0	21.8383	0	25.457	0	33.3333	0	0	18.9023	20.7683	33.3333	15.1343	0	64.6383	33.3333	0	0	0	0	18.957	47.8011	0	0	19.3088	0	0	0	33.3333	0	9.42096	0	0	0	25.6216	0	0	0	0	33.3333	33.3333	17.4234	0	0	0	33.3333	13.5836	0	28.9867	0
0	0	17.4435	33.3333	46.7228	19.7786	20.449	7.67968	0	0	0	12.1798	0	0	0	0	0	0	0	0	0	0	0	50.0182	47.1536	0	0	33.3333	33.3333	0	19.8339	17.3783	23.8432	33.3333	0	33.3333	0	16.62	0	0	33.3333	15.7139	0	100	0	15.6372	0	3.68579	39.8374	30.8317
7.47026	12.7625	0	0	0	0	0	0	0	33.3333	19.0847	0	0	33.3333	0	0	0	0	0	45.103	0	0	0	0	0	20.5383	33.3333	33.3333	0	8.40149	0	0	12.7936	33.3333	0	0	0	26.5454	0	0	33.3333	0	33.3333	0	4.79863	0	0	0	0	0
0	6.54762	0	13.8984	0	0	0	0	0	33.3333	0	0	0	33.3333	13.3627	0	36.8089	0	35.8339	0	4.5589	13.5841	11.0907	0	14.0246	8.97113	0	0	0	0	0	7.40741	0	10.1371	48.1541	0	0	0	49.7914	12.0514	0	0	0	0	16.9218	0	0	0	0	15.7498
6.44258	0	0	0	0	0	18.6652	0	0	0	0	0	0	0	0	0	0	2.42871	0	0	0	0	0	13.9575	11.5947	3.86895	11.7033	33.3333	0	0	0	0	0	0	16.0516	0	32.5461	18.371	0	0	0	34.3084	0	0	0	0	9.49508	13.7081	0	0
0	0	0	0	0	0	0	0	0	0	0	0	11.468	0	2.02832	0	0	11.0271	0	0	0	8.73609	0	0	0	0	0	0	0	14.5347	0	0	9.49016	0	0	0	0	16.7134	0	0	0	15.91	0	0	0	0	0	17.8427	0	0
10.1738	0	0	0	0	0	0	50	6.46766	0	33.3333	0	0	0	0	13.2056	0	11.1521	0	0	5.32392	17.9039	33.3333	0	0	0	0	0	0	0	16.799	0	0	23.1962	0	0	15.7077	0	0	0	0	0	0	0	0	0	5.19243	0	4.34666	0
7.63107	10.8453	14.967	12.3682	28.3146	0	13.3073	0	0	11.6499	5.31329	17.7092	5.07297	14.0656	0	0	0	15.4452	25.3411	40.9	32.781	0	22.0055	35.9097	6.17186	22.653	36.9717	36.2371	31.6636	3.39206	0	24.3026	28.8006	37.2453	15.2904	22.5656	0	7.85936	6.96837	24.0063	52.6337	22.8652	49.573	23.4545	78.0133	35.1422	15.1836	0	3.36529	33.3333
21.1055	0	9.68128	0	0	28.105	0	0	32.565	16.5253	14.7582	17.4419	12.9467	39.6539	33.3333	18.8892	0	0	0	0	0	29.9629	22.9854	0	29.97	0	0	19.8514	0	0	0	24.8714	13.4118	0	0	0	23.0157	0	17.567	26.3223	0	44.2036	33.3333	0	0	24.0527	0	0	0	26.3741
0	9.99043	26.1115	47.4179	57.0196	33.3333	18.0259	0	0	25.5597	0	20.0142	14.2641	0	0	19.0499	79.5196	11.1041	0	18.8228	0	0	21.6499	0	0	9.69309	23.7765	0	33.3333	0	50.3616	25.9995	0	0	53.4948	0	19.0448	49.3349	0	0	0	0	0	0	0	7.58039	0	28.1806	12.0135	30.0824
1.38747	0	0	0	0	17.0643	33.3333	0	0	4.08043	10.5349	0	0	9.34418	33.3333	0	0	11.2664	14.1053	0	7.47664	33.3333	0	30.9581	25.6834	0	0	0	0	16.8883	0	0	0	22.0072	0	40.7007	0	0	34.5964	11.8757	14.5617	0	17.0937	51.9993	0	0	34.4483	18.616	20.4604	0
0	0	0	0	0	0	0	68.2499	44.5447	0	0	0	7.95684	0	24.3321	0	0	0	21.4629	0	12.3405	0	0	12.2777	0	6.10034	14.9642	5.96189	13.9227	0	0	0	6.46876	0	0	0	33.3333	13.7194	0	0	6.93437	24.6811	0	0	0	0	0	24.2258	13.7741	0
0	0	8.53567	0	0	6.40367	11.8596	0	0	0	51.9085	1.91852	27.7917	0	0	0	0	0	0	6.78821	12.337	16.3986	0	0	0	10.6803	0	7.03903	0	4.21538	0	0	23.4581	0	0	0	10.3176	0	0	0	0	1.73639	0	0	8.79906	3.1814	0	0	0	0
45.5611	46.8571	23.652	20.9651	0	0	0	6.67995	0	0	0	0	0	7.77873	0	0	0	12.1742	17.6563	9.18602	0	20.3051	5.22238	10.8404	0	0	0	7.34234	0	0	0	2.70029	0	25.713	25.3914	8.19598	0	0	15.7663	19.6807	20.2026	0	0	0	8.67679	0	41.8766	12.711	12.873	0
0	23.3429	0	19.2487	5.01875	0	0	25.0702	0	17.603	0	11.4006	0	9.92357	9.00127	14.4442	20.4804	0	11.8704	0	14.0721	0	5.08931	0	22.833	23.6402	0	0	14.9726	0	11.0358	7.33381	0	0	0	0	14.2885	20.8736	9.04872	11.104	0	0	0	10.7325	0	27.3513	0	14.2603	19.5592	0
0	0	9.83066	0	0	0	15.3074	0	0	16.808	0	31.5156	22.6959	15.749	0	47.6168	0	17.8881	9.56399	14.5106	0	0	16.8089	10.0141	15.3417	0	17.247	10.1884	6.1078	0	0	8.46192	27.8608	11.3261	0	0	0	8.2127	16.0531	7.01107	0	0	0	13.8137	0	2.69195	8.49156	0	17.9545	6.95923
24.3148	8.96424	7.22187	0	9.64708	15.0937	8.16645	0	22.8904	7.77368	17.4852	0	9.27183	3.48504	0	0	0	32.1219	0	9.79245	20.9929	0	6.23851	0	0	27.233	7.04057	13.3799	0	75.5042	38.6026	6.3304	0	3.70836	5.82334	28.5377	0	0	0	0	5.66759	6.51372	0	0	4.51084	0	0	2.00637	0	3.25098
0	33.3333	0	0	0	0	8.05617	0	0	0	43.9547	0	0	0	8.07386	0	0	33.3333	0	0	0	49.4613	0	27.6695	0	45.1597	0	0	8.31491	0	10.2814	0	0	0	0	18.1142	28.2043	0	0	0	0	0	0	0	33.3333	0	0	6.88015	0	0
0	0	0	33.3333	0	33.3333	0	0	0	0	0	0	0	0	19.6031	0	0	0	0	0	26.5251	0	0	33.3333	0	0	0	0	0	0	0	18.3791	21.3455	0	0	0	0	15.9556	11.1776	0	0	0	45.6219	0	21.1502	0	10.5335	5.43676	18.8039	0
92.1569	55.6762	100	51.8739	100	33.3333	9.95935	37.7048	86.7961	57.4519	17.7543	37.5668	17.959	14.6953	16.0659	66.6667	0	66.6667	44.4142	27.9447	66.6667	27.6971	55.7886	24.7572	39.0314	11.0433	0	29.3702	7.60194	19.4511	55.7243	5.26875	0	9.42797	0	48.5525	0	0	33.3333	0	11.2077	23.48	0	0	0	8.28185	46.7604	0	0	11.606
0	0	0	0	0	33.3333	66.6667	0	0	33.3333	32.9475	33.3333	33.3333	66.6667	0	0	0	0	33.3333	33.3333	0	12.3646	0	0	21.3367	0	90.5498	0	0	0	12.5704	0	0	0	0	33.3333	25.1355	0	14.2279	33.3333	40.6217	22.699	0	25.8387	0	33.3333	0	15.3539	17.632	0
0	0	0	0	0	0	0	62.2952	0	0	0	0	8.55489	0	0	0	100	0	0	0	0	0	0	0	0	0	0	0	58.3518	0	0	27.3086	62.1503	52.8111	11.6785	0	33.3333	0	0	0	22.1256	0	14.2294	12.1982	45.5165	33.3333	0	33.3333	0	0
0	0	0	14.7928	0	0	0	0	0	0	0	0	0	0	38.9897	33.3333	0	0	22.2525	0	0	4.84076	16.894	5.66382	0	0	0	62.7283	0	0	0	11.1456	0	0	33.3333	0	5.12903	0	22.1557	33.3333	0	33.3333	33.3333	9.86524	0	0	22.7998	9.36408	29.1187	33.3333
7.84314	5.26354	0	0	0	0	15.3178	0	13.2039	9.21474	0	4.33297	0	18.638	17.2675	0	0	0	0	0	0	5.63626	0	0	27.6353	0	9.45025	0	0	66.6667	10.9424	0	11.9879	0	0	0	0	43.7529	0	33.3333	13.8636	0	0	7.4946	0	0	0	0	0	0
0	0	0	0	0	0	0	0	0	0	5.34351	10.9014	15.3744	0	0	0	0	0	0	0	0	0	10.8781	8.57615	11.9966	10.4637	0	7.90151	0	0	10.4816	31.8733	0	23.9054	33.3333	0	0	0	0	0	0	9.85332	0	0	0	0	11.4309	0	18.7441	21.7273
0	0	0	0	0	0	0	0	0	0	0	13.8655	0	0	0	0	0	0	0	22.2529	6.80825	0	0	0	0	0	0	0	25.7314	13.8822	0	6.02477	0	0	21.6548	0	0	0	0	0	12.1813	0	0	0	0	0	0	0	0	33.3333
0	5.7269	0	0	0	0	0	0	0	0	0	0	24.7784	0	0	0	0	0	0	16.4691	0	0	16.4394	0	0	0	0	0	0	0	0	0	4.51638	13.8555	0	0	8.19786	40.2915	19.1055	0	0	10.6343	6.81537	44.6032	0	25.0515	8.47543	29.6318	15.7013	0
42.4452	14.1985	48.4927	33.622	19.6114	56.1254	76.965	0	46.7886	49.8737	44.5643	24.0814	27.5821	41.3547	49.6471	40.8108	0	37.2866	58.3936	0	35.2704	20.4193	18.5093	16.2746	31.9619	23.1823	42.7005	34.2911	17.0663	0	28.8958	45.055	49.5736	43.7977	42.834	45.2882	7.88955	0	28.2609	48.8305	49.2038	6.71368	6.46056	0	46.5139	58.1758	34.4893	11.4662	35.0498	33.3333
0	25.9567	0	0	39.8343	0	0	62.3545	33.3333	33.3333	0	0	0	33.3333	23.9769	0	0	29.5655	0	23.8095	33.3333	0	0	13.5097	17.0031	15.9429	33.3333	5.16617	20.6455	69.1474	11.4314	0	0	0	0	33.3333	0	29.1695	19.1527	0	33.3333	14.7436	0	33.3333	28.6114	0	0	0	0	0
25.2541	0	8.49819	33.0284	6.74542	14.1022	0	0	0	0	13.8028	27.8382	2.32843	0	0	33.3333	100	12.5729	0	37.0884	0	0	19.984	0	0	23.7234	0	12.9944	0	0	0	18.6959	33.3333	0	0	0	45.3214	0	33.3333	0	0	0	0	0	0	0	0	14.6724	0	20.5683
0	0	0	0	0	0	0	0	0	6.72106	0	12.1664	0	0	0	0	0	0	0	0	0	8.95536	0	0	0	0	10.2014	0	24.5886	0	0	0	0	42.8892	33.3333	0	0	0	0	34.3318	0	26.6196	9.03396	33.3333	0	0	3.49758	13.9047	0	0
0	26.216	12.2387	9.82964	11.561	0	0	18.4085	0	0	0	0	9.67082	0	8.03866	0	0	0	0	0	0	0	48.1573	5.22046	24.6543	0	0	10.0924	0	0	3.05503	13.8748	0	0	0	0	0	33.3333	0	0	0	0	0	0	0	0	12.8971	0	11.1326	0
0	19.1348	0	0	0	11.4105	0	0	8.60886	0	0	0	16.1064	0	4.82984	9.50358	0	0	23.8683	9.52381	14.7836	21.8645	0	9.70675	0	15.6463	5.61107	19.3812	0	5.26669	30.2252	0	3.66998	0	11.7794	11.7357	25.4438	33.3333	5.07246	0	8.65269	0	26.8728	0	14.5164	10.5727	21.3065	18.6609	0	0
20.5584	7.37667	19.0704	13.5133	0	18.3619	11.2404	0	0	10.0719	9.51129	5.49512	0	7.35504	6.80041	0	0	5.7971	0	0	0	0	0	29.6914	16.3302	17.3904	8.1537	0	23.1436	12.4157	0	7.73683	0	0	0	0	0	4.16388	0	0	0	0	0	0	0	8.49084	0	17.7416	0	0
0	0	11.7	0	9.73667	0	0	9.61308	11.2692	0	0	30.4188	33.3333	8.97374	0	8.98054	0	11.01	0	29.5783	16.6127	0	13.3494	0	0	0	0	0	14.5559	0	18.8469	0	0	13.3131	0	0	21.3453	0	0	16.8377	0	33.3333	57.6327	0	0	0	20.4362	0	53.8175	0
11.7423	0	0	10.0067	5.53465	0	0	9.62392	0	0	32.1217	0	10.9789	0	6.70709	0	0	3.76779	13.8842	0	0	24.1298	0	25.5972	0	0	0	0	0	13.1702	0	0	0	0	0	0	0	0	0	0	8.81017	18.5897	0	0	10.3583	0	0	0	0	0
0	7.1173	0	0	6.97655	0	11.7945	0	0	0	0	0	0	8.98315	0	7.37179	0	0	3.8539	0	0	24.631	0	0	10.0505	4.11467	0	18.0748	0	0	7.54569	14.6374	13.423	0	12.0533	9.64286	0	0	14.1807	0	0	0	0	0	0	22.7606	7.37327	23.5542	0	46.0984
0	0	2.49377	0	0	0	0	0	3.43448	6.45384	0	0	3.80518	11.1298	5.05586	11.4922	0	0	0	0	0	0	0	0	2.48234	0	15.9019	4.0553	8.13844	0	9.60084	18.4426	0	25.8875	12.6487	0	16.7787	0	21.3505	5.00492	3.80201	0	14.0719	21.705	0	4.91611	14.0791	11.9378	0	8.83833
0	0	0	0	0	0	6.13622	11.5004	0	0	0	8.67209	0	0	0	0	10.9308	0	0	6.06173	0	0	8.25623	0	10.4167	0	0	0	8.89659	1.20708	0	0	0	0	18.4994	0	12.8767	24.4037	0	0	5.89839	17.93	0	0	3.72345	0	33.3333	0	29.6957	0
6.97086	0	0	0	0	8.18419	0	0	0	0	0	0	0	0	10.7428	0.77202	0	1.75294	0	0	0.976262	0	6.17185	9.94546	0	0	0	0	0	0	0	0	0	0	0	0	0	23.3365	14.1703	8.92729	0	0	7.86505	6.27918	0	7.56739	0	0	0	33.3333
0	4.12358	0	6.88863	10.5905	0.84471	0	2.63988	10.44	1.76014	7.3656	1.66298	0	10.74	9.86366	1.14845	0	2.73096	0	5.93705	2.90974	0	5.07268	1.90694	2.47568	6.62642	4.73375	12.7419	2.61608	2.58778	11.5787	0	21.143	25.0143	0	0	0	0	6.44188	0	9.71002	2.20751	0	0	0.991944	0	2.08489	15.049	0	22.7211
0	1.41319	5.98475	0	0	0	0	0	0	0	1.95545	0	0	0	0	0	0	0	0	3.51334	0	0	0	0	0	0	5.16605	0	25.7107	0	0	19.83	2.19547	0	30.0673	6.41441	0	0	0	11.4286	0	0	8.40162	11.3483	0	0	0	6.75251	0	0
0	0	0	0	2.25225	0	0	0	0	0	0	0	2.11758	0	0	0	0	0	0	0	0	0	0	0	0	0	0	0	0	0	0	0	0	0	0	0	0	16.8222	0	0	0	0.988638	0	0	0	3.38638	0	0	0	0
0	0	0	0	0	0	0	38.4996	0	0	0	0	0	20.8107	0	0	0	0	33.3333	0	0	0	0	0	10.5858	0	0	0	0	0	0	0	0	0	0	0	8.75542	0	0	0	0	0	0	0	0	0	0	0	17.4424	11.5316
33.3333	62.5431	0	61.8353	22.9783	0	66.6667	47.3601	56.227	0	90.679	64.2661	31.2158	15.8537	46.9483	54.026	0	63.9357	66.6667	27.2716	32.3571	66.6667	27.1615	64.7597	56.25	93.3736	0	33.3333	0	51.4979	78.8205	0	45.5237	0	0	93.5856	0	9.99684	19.163	0	0	0	0	0	30.2719	0	0	18.2844	28.1937	0
28.9846	0	91.5215	31.2761	0	90.9711	27.1971	0	29.8985	66.6667	0	25.3989	62.8615	0	27.3894	32.5613	89.0692	31.5804	0	0	33.3333	33.3333	53.3378	0	0	0	74.1983	49.8694	47.0703	0	0	32.2369	31.1379	49.0982	24.0596	0	28.2558	25.4408	22.3065	74.6392	80.5896	20.9827	10.8598	40.4904	65.0127	84.1301	19.2543	0	0	0
30.7112	31.9201	0	0	64.1789	0	0	0	0	25.1194	0	0	0	41.4659	0	0	0	0	0	57.2163	30.4236	0	0	23.3879	17.7896	0	0	0	7.56788	44.7073	0	29.4905	0	0	14.725	0	33.3333	0	16.5678	0	0	57.8911	25.4683	20.1772	0	0	31.2484	47.9764	24.6682	23.5756
0	0	0	0	0	0	0	26.1288	0	0	21.4666	0	0	21.9216	0	0	0	0	30.9478	0	0	15.0137	0	0	0	10.4346	0	0	0	0	41.924	0	0	0	0	0	0	0	0	0	0	0	31.5371	0	0	0	28.5714	2.27604	20.3458	6.99275
0	0	18.4638	0	23.5331	0	23.2145	46.7503	66.6667	33.3333	0	0	0	0	63.6744	33.3333	0	0	0	0	0	26.0776	33.3333	0	0	0	0	0	0	0	0	0	0	26.6236	9.3384	0	0	12.2534	51.3821	0	0	0	25.0183	48.6881	0	33.3333	0	0	19.4796	0
56.5776	0	0	33.3333	0	8.99836	21.66	16.5208	0	23.4348	0	21.0719	21.5633	0	0	0	0	0	0	26.7568	0	33.3333	33.3333	16.3323	33.3333	0	17.7855	0	19.346	0	0	20.5604	53.8184	0	15.1327	100	33.3333	16.5598	0	44.3095	22.5818	21.3136	0	0	0	0	0	0	0	0
0	0	12.2449	0	33.3333	0	16.4085	0	0	0	33.3333	0	33.3333	17.8263	33.3333	0	0	0	0	0	50.5901	18.3196	0	0	33.3333	22.8987	0	33.3333	0	0	0	0	33.3333	21.6951	0	0	15.6502	9.93187	0	33.3333	33.3333	0	0	0	33.3333	33.3333	33.3333	43.6881	7.26102	14.837
0	0	0	0	0	0	0	0	0	0	0	33.3333	0	11.4118	0	0	0	33.3333	0	40.7016	33.3333	7.25576	0	0	0	0	16.6553	0	33.3333	25.4552	10.6402	10.4899	0	33.3333	0	0	12.7249	0	0	0	6.95249	0	0	12.0952	0	33.3333	0	33.3333	12.3138	33.3333
43.4224	66.6667	33.3333	33.3333	0	24.335	0	7.35037	0	0	0	28.2782	0	0	0	0	100	33.3333	40.8649	0	0	0	0	37.9684	0	33.3333	15.5478	6.70397	23.6084	0	0	33.3333	0	6.70972	33.3333	0	0	6.60377	48.6179	0	0	33.3333	8.31503	33.3333	0	0	0	0	13.8537	0
0	0	35.9579	0	9.80023	0	0	3.24974	0	0	0	17.3165	0	33.3333	2.99228	0	0	0	2.38553	6.57658	16.0766	0	33.3333	0	33.3333	33.3333	33.3333	0	0	0	0	12.773	0	11.6382	42.1956	0	17.6831	16.7735	0	15.8953	37.1323	0	33.3333	5.88338	33.3333	0	4.7619	16.2238	0	44.8369
0	0	0	0	0	33.3333	16.9249	0	0	0	11.8667	0	0	15.5071	0	0	0	0	0	25.965	0	0	0	0	0	0	16.678	0	23.7123	41.2115	41.5074	0	12.8482	0	0	0	0	21.08	0	6.46182	0	12.0198	0	0	0	0	0	0	0	0
0	0	0	0	0	0	10.1188	0	0	9.89855	0	0	0	0	0	0	0	0	0	0	0	0	0	17.001	0	0	0	0	0	0	0	0	0	0	0	0	20.6084	0	0	0	0	0	1.79626	0	0	0	0	4.47871	5.72648	0
0	0	0	0	0	0	11.6733	0	0	0	0	0	11.77	0	0	0	0	0	25.8018	0	0	0	0	28.6983	0	0	0	26.6294	0	0	5.92847	22.8435	0	0	0	0	0	16.7977	0	0	0	33.3333	0	0	0	0	0	0	21.0196	0
56.4088	0	49.7506	0	31.0606	0	12.6702	49.0404	41.4203	11.7684	40.8876	28.2595	10.9578	8.82419	53.5258	38.3605	0	25.2525	0	8.493	26.5603	24.0627	48.1096	0	6.47511	9.15693	25.4825	14.5246	0	23.0621	0	23.9548	39.1485	11.9937	22.716	28.3861	15.5463	17.4556	33.3333	41.5142	25.6638	0	2.88313	58.7835	56.1519	22.1801	0	39.1833	8.36039	31.1449
0	34.4968	20.3243	0	18.586	19.989	0	0	0	48.9374	0	25.1251	24.0053	40.281	0	0	76.2615	17.4403	45.1096	0	25.5635	0	0	0	20.6341	44.7994	0	0	50.9694	23.3515	0	0	0	18.8505	33.3333	33.3333	14.2566	0	28.1333	0	60.9391	0	0	28.4836	0	66.6667	0	0	0	9.90297
0	28.5967	0	46.7018	0	15.7594	0	0	34.9617	0	0	0	0	11.2561	13.4844	21.746	0	0	12.6972	45.7563	0	0	0	33.3333	33.3333	0	0	0	33.3333	0	9.30203	22.9323	33.3333	33.3333	33.3333	9.05603	0	17.586	22.1789	29.6902	0	10.2204	11.891	0	0	0	38.1424	0	20.2039	0
0	0	0	30.5382	0	0	66.6667	12.3932	0	0	13.1587	5.90765	16.5733	0	0	0	0	11.1662	0	0	0	20.5206	37.1292	0	0	11.5379	12.8819	0	0	0	18.2194	0	10.7033	7.43066	0	0	0	0	0	0	0	0	30.1174	0	6.6605	0	0	0	0	28.3132
19.7894	11.3519	16.916	0	22.2869	36.9541	2.00853	0	0	26.4926	10.3507	10.6351	16.5067	0	0	9.20729	0	6.09577	0	0	11.0558	21.4286	0	38.903	17.4598	0	32.4383	45.3871	0	8.65595	0	24.4851	0	0	0	0	0	22.3587	0	10.81	0	51.8846	0	0	0	6.15676	18.0112	44.6341	7.66878	0
0	0	0	0	0	17.5739	0	0	0	0	0	0	0	15.0128	0	13.4366	0	0	0	33.8634	17.1655	0	0	0	12.6992	0	0	0	0	0	24.0313	0	0	14.4829	10.6173	13.4807	0	0	0	0	0	21.7769	0	0	0	0	10.7792	0	0	6.36617
0	0	0	9.8281	0	0	0	0	11.6025	0	0	0	0	13.132	11.899	11.5873	0	21.2998	20.6361	0	0	15.3757	0	0	0	8.15089	17.0297	15.0114	3.7011	17.1375	48.4473	0	16.8149	13.9089	0	15.7439	33.3333	0	11.1544	17.9855	0	0	5.62713	7.88317	11.5221	0	0	0	11.4389	19.8942
0	9.67705	13.009	0	14.7473	9.72353	0	38.5664	0	0	30.2683	14.0664	26.1547	0	10.487	0	23.7385	9.79725	0	0	0	11.9048	14.7612	27.7637	0	12.6385	0	0	0	0	0	0	0	0	0	0	19.0767	9.26634	0	0	7.66953	0	33.6661	4.84978	17.5711	0	0	16.1826	17.3042	0
23.8017	15.8775	0	12.9319	13.3192	0	18.6546	0	12.0155	0	5.33463	16.0063	5.80225	11.4939	0	5.66224	0	8.9482	21.557	11.8872	19.6549	6.70767	0	0	9.39838	7.1385	12.1677	6.75498	0	27.7928	0	8.84819	0	0	0	0	17.787	0	5.20007	0	5.72757	16.1181	15.8152	0	8.09438	4.99645	17.745	0	0	0
0	0	0	0	0	0	0	0	0	12.8016	0	0	0	0	10.6039	0	0	0	0	0	0	0	0	0	0	6.57791	0	18.3219	11.9961	0	0	19.7795	0	0	0	0	0	0	0	0	0	0	0	0	0	0	15.3221	0	35.0239	4.37857
0	0	0	0	0	0	0	0	0	0	0	0	0	0	0	0	0	0	0	0	0	0	0	0	4.47761	0	2.15195	0	0	0	0	0	0	0	16.0184	0	0	0	0	0	0	3.18253	0	0	0	0	0	4.39591	0	7.59023
0.564179	0	0.893836	1.17788	0	0	0	0	5.8495	2.70081	0	9.72996	8.8829	0	0	0	0	0	0	0	2.44476	0	2.84042	6.19778	7.25461	0	13.6139	0	0	0.635814	7.70642	2.05669	10.6585	0	4.13782	0	0	36.8248	2.72077	0	0	2.21638	0	2.34626	0	0	0	6.42926	0	13.9688
0	0	0	0	0	4.50099	6.97157	0	2.04062	0	1.98559	0	0	2.89445	5.12777	7.95513	9.11801	0	5.79668	0	0	8.80059	0	0	0	0	0	0	21.8053	0	0	0	0.903388	14.1977	0	2.56183	13.4085	12.0178	1.8411	10.6683	0	0	7.75477	4.17278	0	0	0	0	0	4.4843
0	0	0	0	0	0	2.42967	7.01776	0	0	0	0	3.19732	0	0	0	0	0	0	0	0	0	2.92991	0	0	0	0	0	0	0	0	0	0	3.145	0	4.38457	0	0	0	0	7.98022	8.4612	0	0	0	2.05802	10.0127	9.41977	4.68165	0
0	0	0	0	0	0	0	0	0	0	0	0	0	0	0	9.81367	0	0	0	0	0	0	0	0	0	0	0	0	0	0	0	0	15.2498	0	0	0	0	0	0	0	0	0	0	0	0	0	0	0	14.6308	8.20948
22.0972	40.6277	26.9287	75.9937	50.4103	0	10.0428	16.3551	11.0376	0	63.3507	9.80022	0	33.3333	0	9.26799	0	78.8153	0	15.3091	61.6762	0	0	0	8.35816	86.3246	9.89021	33.3333	16.5615	42.6076	32.246	24.5445	0	0	0	0	4.17632	11.5492	0	0	0	0	25.5786	0	0	0	0	0	0	0
23.02	0	0	0	0	17.2736	0	0	31.3812	43.5905	0	40.6577	0	43.8039	61.5389	25.3782	0	0	0	11.1725	0	28.9444	24.4964	93.8022	0	0	10.3383	25.6321	0	0	0	0	0	13.0536	0	23.8343	0	21.3155	0	12.6286	0	8.87224	33.3333	0	0	0	26.2617	43.3365	0	0
0	0	0	8.27068	9.79579	0	0	0	0	0	0	0	0	0	0	0	0	0	0	33.3333	0	0	0	0	28.8557	13.6754	33.3333	0	0	0	0	0	22.6748	0	12.3474	0	55.7132	18.2927	30.6126	33.3333	0	0	33.3333	33.3333	33.3333	33.3333	33.3333	23.3536	61.985	0
23.6643	14.1916	72.1775	0	39.7939	78.2254	80.556	76.6272	49.6911	33.3333	14.2947	23.5331	87.9198	0	33.3333	47.585	90.882	0	60.87	40.185	16.3786	33.3333	69.7333	0	51.0539	0	9.38119	41.0346	61.6332	13.2877	4.34251	73.3988	50.5134	57.9402	22.5902	51.3448	26.702	0	31.4922	43.3697	92.0198	58.4685	0	60.1476	66.6667	64.6086	0	0	0	65.7472
30.6543	45.1807	0	14.5578	0	0	0	0	0	20.3754	20.369	16.279	0	19.9683	0	0	0	21.1847	33.3333	0	19.5005	28.9217	0	0	0	0	21.2912	0	0	43.4689	55.705	0	0	11.6635	44.9062	17.8745	0	0	33.3333	0	0	18.7991	0	0	0	0	30.3922	13.065	18.7025	0
0	0	0	66.6667	26.3326	0	0	0	0	33.3333	0	0	0	25.3445	33.3333	0	0	62.3371	0	0	22.2139	33.3333	6.03835	54.6262	0	33.3333	0	26.9244	0	0	23.639	0	0	0	0	0	0	0	0	0	0	0	56.1145	0	0	0	14.1454	0	0	0
0	30.0981	0	0	0	0	0	0	33.3333	0	0	0	0	22.2072	14.7894	24.7783	52.384	0	0	33.3333	0	0	0	0	0	66.6667	0	0	0	0	0	0	49.5338	0	33.3333	0	0	26.6204	0	0	0	0	0	0	0	20.3077	0	20.3637	0	0
0	0	54.43	0	14.6689	0	0	0	0	33.3333	33.3333	20.5752	0	0	0	0	0	0	17.2122	23.0375	18.4173	0	0	0	28.6026	0	15.0636	18.8034	28.9299	0	0	15.127	0	33.3333	0	21.9761	0	10.5562	0	23.248	27.7397	19.476	0	20.2162	0	33.3333	0	16.2393	0	23.4747
39.6844	0	0	0	33.3333	24.7451	0	28.9196	33.3333	0	23.6181	0	44.7454	0	0	0	0	0	0	33.3333	0	13.4815	0	0	0	0	0	0	19.6806	0	0	0	0	33.3333	0	0	35.6602	0	19.1781	0	0	0	0	33.3333	0	0	59.5508	33.3333	64.839	33.3333
0	0	0	33.3333	0	33.3333	33.3333	11.8219	0	9.70599	33.3333	0	0	0	0	33.3333	0	0	66.6667	0	0	0	0	0	21.1263	0	51.4694	0	0	0	0	0	0	33.3333	0	33.3333	0	0	0	0	33.3333	0	10.5522	0	0	0	0	0	0	0
0	33.3333	33.3333	0	18.6645	33.3333	15.3169	0	33.3333	0	0	0	21.9213	7.98879	18.5439	0	0	0	0	0	0	0	0	33.3333	0	0	0	14.5299	33.3333	0	9.69428	0	0	0	0	0	33.3333	1.69233	66.6667	43.4187	0	33.3333	0	0	0	13.0256	13.3071	0	0	0
0	33.3333	12.2366	0	7.00073	0	0	38.1781	0	23.6273	0	12.7581	0	11.1261	0	33.3333	47.616	4.32956	0	5.73964	0	0	60.6283	10.2411	16.9378	0	0	0	0	0	0	18.2064	0	0	0	11.3572	10	14.8786	0	0	38.9269	13.8573	0	13.1172	0	0	0	0	0	14.9604
39.6226	3.23523	0	0	0	0	0	21.0804	0	0	9.71524	0	0	0	0	8.55502	0	0	0	0	14.916	0	0	1.79928	33.3333	0	33.4671	39.7423	18.0562	0	0	33.3333	8.53122	0	0	0	0	25.1677	14.1553	0	0	0	0	0	0	0	0	0	13.8654	0
0	0	0	0	0	0	0	0	0	0	0	0	0	0	0	0	0	0	0	0	11.1194	0	0	0	0	0	0	0	0	0	66.6667	0	8.60168	0	0	0	0	0	0	0	0	0	0	0	0	0	7.11588	30.0636	21.2956	28.2316
20.693	0	0	0	0	8.58825	51.3497	0	0	0	0	0	0	0	0	0	0	0	16.1211	4.55621	0	19.8519	0	0	0	0	0	0	0	0	0	33.3333	0	0	33.3333	0	21.0065	21.0848	0	0	0	0	33.3333	0	0	0	5.88081	0	0	0
16.6544	8.87213	0	13.3774	0	5.98653	0	0	28.4869	18.7694	43.1856	22.9917	25.4435	8.37114	0	33.7264	50.6206	9.65413	0	0	0	8.64568	13.0011	2.88727	30.3766	18.6753	33.5553	6.5799	18.8791	11.5704	0	14.6089	14.8481	30.2018	0	31.9835	0	0	33.8012	17.3767	33.3333	8.89992	28.4362	35.9867	21.5358	40.8151	0	2.97275	32.7368	37.6351
0	38.129	18.7386	47.3181	57.8428	0	26.8217	82.689	0	19.3358	0	14.4749	20.4427	22.3998	67.1008	0	0	7.78613	13.9697	7.75786	43.9589	17.5152	15.1609	0	0	26.9111	33.3333	26.9991	58.6504	15.5158	7.37604	15.0662	23.2835	0	14.3529	0	0	33.3333	27.134	0	23.995	0	24.9814	25.0597	22.8276	0	0	18.6218	0	0
0	0	42.5267	0	0	50.4336	0	0	0	8.59641	0	0	0	0	0	26.6385	0	0	0	35.9426	0	0	16.5222	12.67	0	0	0	0	0	16.784	4.67994	0	0	57.9752	26.0417	0	28.4149	49.433	0	59.9821	26.0904	41.1231	13.7608	0	0	19.0204	18.9012	0	0	0
28.8474	24.4612	0	0	0	0	66.6667	0	26.0938	0	0	0	0	25.7349	0	0	0	0	0	0	0	0	0	33.3333	17.0238	0	0	0	0	7.66769	0	24.5046	8.05632	0	0	10.8666	17.5703	0	28.1049	0	0	24.4334	0	0	8.79388	0	33.3333	13.4564	18.1948	33.3333
23.4674	0	0	24.4094	8.40174	0	0	0	10.9156	24.1965	16.4718	0	13.8956	11.3365	14.8604	14.5484	49.3794	39.1262	33.3333	8.69854	0	33.3333	18.2922	0	14.3272	14.658	0	34.1491	0	0	61.9867	0	9.55711	0	0	31.0202	33.3333	0	0	0	0	0	0	4.50361	22.1353	7.10204	0	0	4.67742	23.3377
21.1648	15.23	14.5948	0	13.9839	0	0	10.0924	0	25.8407	0	21.4548	11.9483	7.72787	15.0897	10.945	0	33.3333	52.697	24.9314	4.32238	0	16.8112	51.1094	21.0441	39.7556	8.03325	0	14.4542	34.3668	25.9573	24.0808	7.21939	0	0	0	0	0	6.1993	0	9.3383	0	0	27.0179	0	0	0	10.2532	0	0
0	0	0	0	0	15.1602	6.5116	0	0	0	15.8431	15.501	12.8906	0	0	0	0	0	0	0	17.4266	30.5444	0	0	0	0	12.3749	0	0	14.0952	0	0	0	3.13152	26.2721	0	0	17.2336	0	15.9566	0	22.169	27.9245	7.43206	0	25.8516	47.7655	0	0	0
0	0	0	0	19.7716	17.4245	0	0	24.9954	0	24.4996	18.8585	15.3792	13.6257	0	7.44692	0	0	0	0	24.736	0	20.2125	0	0	0	0	32.2719	8.01624	0	0	8.82876	10.4289	8.69142	0	0	4.9184	0	4.76061	0	0	0	0	0	12.0612	0	0	0	16.2201	0
0	13.3077	24.1399	14.8951	0	10.9952	0	7.21861	9.50825	0	0	0	0	10.8041	0	6.69481	0	10.1002	0	22.6696	9.55606	0	0	0	8.58631	0	8.12247	0	0	0	0	0	26.6067	0	0	26.1297	0	0	0	0	7.24292	3.37451	4.89717	0	12.6462	7.21088	0	54.6958	15.1386	5.69395
9.86592	0	0	0	0	0	0	0	0	3.26123	0	6.71917	0	0	2.94911	0	0	0	0	0	0	9.96143	0	0	8.64198	0	4.58069	0	0	0	0	12.9108	0	0	33.3333	0	15.763	0	0	6.68459	0	0	0	0	0	0	0	0	13.0323	0
0	0	0	0	0	0	4.9783	0	0	0	0	0	11.2889	0	0	0	5.04367	0	0	0	0	0	0	0	11.0159	0	0	0	6.87328	0	0	6.45967	0	4.45902	16.4723	2.98654	0	19.8382	0	0	0	0	0	0	0	0	5.7867	0	0	7.25154
3.81607	0	0	1.93498	0	4.25831	5.97947	4.66181	0	0	0	8.31627	0	0	3.70714	1.64154	0	4.27568	2.17336	0	5.17104	11.0297	4.56999	11.6035	0	10.5091	0	7.07771	0	6.54659	0	3.5229	2.88845	2.86401	0	0	0	9.99175	1.13551	0	0	5.08096	0	0	0	0	3.31913	0	0	19.0633
0	7.17501	3.64024	0	4.88391	0	0	0	3.31594	1.55072	2.05872	0	0	0	0	10.3342	0	5.86207	3.71055	0	5.59068	0	0	0	0	0	4.36164	0	5.49565	5.85543	0	0	0	4.65361	0	0	0	0	0	0	0	0	11.5959	0	0	33.3333	0	6.88731	0.805081	0
0	0	0	0	0	0	0	0	0	0	0	0	0	0	0	0	0	0	0	0	0	0	0	0	0	0	0	0	0	0	0	0	0	0	0	0	0	0	0	3.10359	0	0	0	0	0	0	0	0	0	0
0	0	0	0	0	0	0	0	0	0	0	0	0	0	0	0	0	0	0	0	0	0	0	0	0	0	0	0	0	0	0	0	0	0	0	0	0	0	0	0	0	0	0	0	0	0	8.41782	0	0	0
10.1288	0	12.0248	0	7.46216	0	11.5127	0	0	0	40.816	12.501	10.3262	7.83424	8.42455	22.9992	0	31.146	14.5484	10.0909	9.07533	88.9703	0	19.6616	22.3174	45.2955	18.7187	11.6812	4.39633	78.6432	33.3333	0	0	0	0	33.0887	25.9586	25.0619	4.54204	0	11.3844	33.3333	0	0	0	0	4.68675	33.3333	63.7409	0
0	23.558	0	20.5309	0	0	0	0	0	0	31.2746	0	0	33.3333	0	10.5439	0	58.7162	0	23.3896	0	0	0	47.6596	0	0	0	0	0	0	0	0	33.3333	16.459	0	0	0	0	0	0	0	0	4.8725	0	0	0	0	0	0	44.5965
52.7218	52.0741	37.9335	64.7317	87.6539	95.7417	33.3333	45.3382	63.3507	66.6667	0	60.1838	0	0	62.9595	0	94.9563	0	0	33.3333	80.1629	0	0	0	0	44.1954	36.9133	30.7978	56.6271	8.95476	66.6667	33.3333	0	28.6797	21.8329	30.3468	0	21.7666	0	0	66.6667	0	33.3333	33.3333	33.3333	0	0	0	11.0366	0
33.3333	0	29.6931	0	0	0	44.1962	50	33.3333	0	0	0	78.3849	58.8324	24.9088	31.6918	0	0	79.5677	23.2424	0	0	95.43	0	66.6667	0	33.3333	28.7911	26.6076	0	0	56.6841	63.7782	30.4693	61.6948	23.9169	50.4753	23.3416	94.3224	96.8964	0	61.5857	23.0909	66.6667	66.6667	66.6667	52.8741	59.7794	24.4174	29.0887
0	17.1929	16.7084	12.8025	0	0	0	0	0	31.7826	25.8507	18.9989	0	0	0	22.7895	0	0	0	9.94375	0	0	0	21.0753	0	0	6.67306	21.6521	0	0	0	0	0	12.4153	0	9.66106	23.5661	0	0	0	21.949	0	27.1074	0	0	0	24.9155	0	0	0
0	33.3333	29.1711	44.0048	18.9896	0	0	0	0	33.3333	0	0	0	33.3333	0	27.2666	0	64.5542	0	0	33.3333	35.3087	0	0	15.8604	22.1511	0	0	0	63.0152	37.6706	14.4738	0	0	0	0	0	0	0	0	0	0	12.2142	0	26.5845	33.3333	0	0	14.0367	0
0	0	0	0	33.3333	0	0	19.961	33.3333	0	0	20.0086	0	0	14.5873	0	0	0	66.6667	0	0	0	0	24.4466	0	0	0	0	0	0	33.3333	0	0	0	0	0	0	0	0	20.2337	0	33.3333	33.3333	19.2482	0	0	0	0	0	18.0773
0	0	0	0	0	15.5504	28.8854	0	16.1119	0	0	5.67499	52.016	33.3333	0	0	58.4484	0	0	33.3333	0	28.2531	26.1374	0	33.3333	0	0	50.8243	0	0	0	0	27.4002	13.8595	33.3333	0	0	33.3333	47.5156	33.3333	33.3333	0	0	0	0	0	0	27.318	24.7263	0
33.3333	33.3333	0	22.6619	0	33.3333	0	0	0	66.6667	11.8182	0	0	23.5347	33.3333	0	0	0	0	0	33.3333	0	0	0	0	68.9935	10.4132	0	0	24.9717	9.65206	18.8595	0	30.4455	26.4747	33.3333	0	0	0	0	48.6513	0	0	33.3333	6.74881	0	28.0059	0	0	55.8398
0	0	5.37509	0	14.3437	0	33.3333	13.39	0	0	0	0	0	0	18.746	0	0	35.4458	0	33.3333	33.3333	20.4718	0	8.88676	0	0	33.3333	0	66.6667	0	14.025	0	0	0	0	0	0	0	0	46.4329	0	0	0	47.4185	33.3333	0	11.2318	0	0	0
0	0	33.3333	0	0	0	16.0462	0	0	0	0	27.6583	0	0	0	0	0	0	0	0	0	0	0	0	0	0	0	0	0	0	0	33.3333	0	0	33.3333	0	0	9.9294	0	0	0	37.2993	21.1191	0	0	0	0	20.4934	33.3333	15.256
0	0	4.16222	0	0	17.783	0	0	0	0	0	13.3248	0	0	33.3333	6.06677	0	0	0	0	0	0	7.19598	0	50.8062	0	56.2535	0	0	8.36166	0	0	39.2665	19.4738	0	0	66.6667	33.3333	19.151	0	0	0	0	0	0	0	0	18.4641	19.2966	0
0	0	0	0	0	33.3333	0	50	17.2214	0	54.8485	0	14.6506	0	0	0	41.5516	0	0	0	0	15.9665	33.3333	0	0	0	0	49.1757	0	3.65148	0	33.3333	0	36.2212	6.85863	0	33.3333	0	0	0	0	0	0	0	0	0	5.32747	6.01538	8.60708	0
0	0	0	0	0	0	0	16.649	0	0	0	33.3333	0	0	0	0	0	0	0	0	0	0	0	33.3333	0	0	0	0	0	0	5.31897	0	0	0	0	0	0	0	0	0	0	10.1075	0	0	0	0	0	0	0	0
0	0	27.9582	0	0	0	21.7351	0	0	0	0	0	0	9.79868	0	0	0	0	33.3333	0	0	0	0	33.3333	0	8.85545	0	0	33.3333	0	0	0	0	0	0	0	0	23.4039	0	0	18.0153	19.2599	0	0	0	0	22.1016	27.7091	0	10.8268
40.0359	31.5171	19.0515	35.9545	45.7047	19.5466	18.9544	0	23.4621	34.146	33.4146	19.6373	25.8861	16.639	0	26.5869	39.6211	38.3988	31.496	33.521	76.6527	18.3524	24.6433	0	47.8617	33.6262	32.7623	24.9548	56.2075	28.4071	7.11901	0	53.4249	32.0729	50.2678	49.8031	0	30.484	47.1939	53.5357	0	0	34.8508	0	40.2306	40.0721	8.65385	0	13.2605	49.3605
0	19.3708	0	0	16.5232	28.9695	24.5426	53.3797	21.8911	20.4542	0	40.4597	17.0797	22.1934	29.7114	15.2392	0	23.979	14.4614	0	0	0	33.7202	0	18.5735	0	0	27.1173	0	20.2266	0	37.6028	0	24.4569	0	0	25.5167	0	0	23.9766	0	27.7112	14.7707	51.6191	7.18919	0	11.4616	0	17.1653	0
19.879	0	19.4848	26.4399	0	0	33.3333	0	0	0	19.5528	0	0	0	24.9554	9.77657	0	0	0	0	0	9.66141	0	0	0	0	23.8309	9.95991	0	0	15.0114	10.0887	23.7912	0	5.7384	0	33.3333	0	0	0	43.3224	0	0	29.1667	0	0	16.5025	30.6649	0	0
0	0	0	10.1465	0	0	0	0	0	0	0	0	28.3772	0	0	17.521	0	3.7488	0	0	0	29.1393	0	57.5246	3.66635	33.3333	19.8959	0	0	9.69525	24.2066	0	0	11.084	0	0	33.3333	0	0	0	25.9571	15.4336	37.0829	0	0	35.0672	18.8077	0	45.0849	42.6712
0	17.9137	24.7828	0	5.09705	6.80891	0	0	12.3418	8.44057	19.0044	0	12.4033	10.7983	0	7.34678	60.3789	9.50122	0	8.97095	0	0	0	33.3333	9.84879	16.631	0	22.8508	33.1127	0	12.2886	0	0	0	0	28.5535	0	16.9638	23.7887	0	0	14.7459	0	0	19.3304	14.2651	0	33.3333	0	0
14.6632	0	5.1735	0	0	6.27622	14.3789	34.482	27.0398	0	0	28.3942	16.2537	6.93496	0	0	0	0	7.11111	32.9174	18.0882	6.37132	23.0539	0	0	0	14.0084	8.90122	0	29.7099	0	23.2447	0	0	14.5962	21.6434	0	36.1827	0	11.657	0	0	0	0	0	0	19.9598	0	16.168	0
13.4543	31.1984	22.8324	0	11.7131	11.8267	0	0	0	0	0	11.5088	0	11.1399	22.9955	0	0	10.5896	32.7093	0	0	23.6719	0	0	8.58149	7.62205	0	0	0	0	18.3219	29.0639	13.2418	23.5098	11.9831	0	7.81666	0	0	0	0	17.8998	0	15.0475	0	0	5.87179	18.1458	0	0
0	0	8.67508	13.5644	14.6765	0	8.79074	12.1383	0	36.9592	13.7805	0	0	0	13.9597	12.7821	0	9.35429	0	11.6766	0	4.19407	13.5317	0	6.55712	0	0	6.21603	0	0	9.12675	0	0	0	4.7683	0	0	16.3695	26.4199	0	13.3349	24.2095	0	4.16667	28.1565	10.5956	0	0	0	0
11.9675	0	0	13.8948	6.28549	15.2921	0	0	15.2652	0	14.2477	0	0	32.2945	0	0	0	4.42822	14.2222	12.914	5.25914	0	5.05096	9.14205	4.91101	8.7874	0	0	0	11.9612	13.9257	0	9.54209	0	0	0	0	0	0	6.19394	10.0094	0	6.85593	0	0	0	0	17.8559	4.7236	7.96831
0	0	0	0	0	11.28	0	0	0	0	0	0	0	0	8.3779	10.7474	0	0	0	0	0	8.60964	0	0	0	0	9.50243	0	10.6798	0	0	0	0	8.87639	12.6462	0	0	0	2.5974	4.63676	7.37622	0	6.43968	0	5.09343	0	18.7427	0	3.5976	0
0	0	0	1.33645	0	0	3.9982	0	0	0	0	7.32259	5.44844	0	0	0	0	0	0	0	0	0	0	0	0	0	0	0	17.8717	0	0	20.4693	11.7932	0	0	0	3.46222	17.2864	0	0	0	0	0	33.3333	0	0	16.0623	0	7.90359	21.1874
0	0	33.3333	0	0	5.75315	0	0	0	0	0	0	0	1.12664	4.99476	3.32378	0	1.25823	0	3.66552	0	0	0	0	0	0	9.89362	0	0	0	0	0	0	8.67328	8.21123	0	4.21596	0	0	0	0	0	0	5.38586	0	3.229	0	0	0	0
0	4.40993	0	0	0	5.02616	0	21.3918	11.8931	0	14.4937	0	0	0	0	3.33403	7.8061	0.857668	0	0	0	6.11499	4.76648	10.0978	6.74863	0	8.52639	0	2.94669	1.41992	0	0	3.11368	0	0	2.32235	6.1446	11.7545	4.41807	2.25071	0	0	4.07107	3.80452	4.35046	0	0	12.2488	0	0
2.48283	0	0	0	0	0	2.7997	0	0	0	0	0	0	1.8669	4.13882	3.48214	0	2.19548	3.14725	0	7.58857	0	0	0	4.99171	1.44656	0	0	1.86298	0	0	0	3.32967	0	8.77944	2.54584	0	3.1728	0	0	0	4.64413	8.36935	0	1.44237	0	0	1.05782	0	1.69168
0	0	0	0	0	0	0	0	0	0	0	0	0	0	0	0	0	0	0	0	0	0	0	0	0	0	0	0	0	0	0	5.44837	0	3.79033	11.5772	0	0	0	0	0	0	0	10.9129	0	0	0	0	12.4736	0	3.22382
33.0579	10.7789	0	18.8111	18.4098	0	0	0	0	0	0	7.20832	13.2489	0	0	0	0	27.4379	0	0	0	7.50526	0	0	0	40.5935	0	0	0	34.7308	0	22.7664	0	21.0683	6.44078	0	0	0	0	0	13.2171	0	0	0	0	0	0	0	32.9181	20.7926
19.2816	47.2248	17.226	0	33.3333	0	17.851	7.58446	12.3869	15.0553	37.9492	0	0	0	28.3386	0	92.1939	15.8237	0	0	21.8938	0	0	25.9604	0	12.1019	0	0	12.1529	33.3333	0	0	0	0	0	0	0	0	0	0	0	0	0	0	0	0	0	0	0	0
15.7283	0	0	0	0	33.3333	30.5336	0	0	0	33.3333	33.3333	33.3333	0	0	29.8512	0	0	33.3333	29.6678	0	33.3333	33.3333	0	28.3416	0	0	100	0	0	0	0	21.5401	0	0	30.7875	0	24.8768	0	0	0	62.0225	24.964	0	94.2072	0	83.9377	9.708	0	53.1045
17.8805	22.5545	49.4407	46.5191	25.6509	55.8874	44.8175	40.4651	75.7201	58.5891	0	52.1358	47.9693	66.6667	62.5278	60.0089	0	37.1129	63.5194	66.6667	70.5176	33.3333	61.9002	33.3333	59.918	45.858	81.58	0	65.1658	12.2755	0	51.3159	30.0037	42.7587	40.4374	32.5573	29.1174	21.3307	95.5819	97.7493	53.4496	0	51.6827	57.4763	0	96.771	0	53.1353	18.7511	0
11.5689	15.032	0	33.3333	22.6059	0	0	30.5586	0	26.3556	14.2238	0	0	30.3398	0	0	0	15.3141	0	0	0	19.7131	0	30.6084	0	0	0	0	0	18.2405	100	0	30.2197	23.7093	24.5539	31.787	57.0598	21.5789	0	0	33.3333	33.3333	0	0	0	0	0	11.3766	40.4272	0
33.3333	0	25.368	0	0	0	0	0	0	0	0	0	0	0	16.1411	0	0	0	0	0	0	27.2717	0	0	0	23.5241	0	0	0	30.7902	0	0	0	0	0	0	0	0	0	0	0	10.1165	0	20.9766	0	0	15.2182	0	0	0
0	0	0	33.3333	0	33.3333	0	0	0	0	0	0	0	0	0	0	100	22.3896	0	0	0	0	0	0	0	0	0	20.037	0	0	0	0	0	0	0	0	30.2099	0	0	22.3341	0	9.68391	23.1539	0	33.3333	0	0	0	0	12.5583
0	0	0	0	33.3333	0	51.3169	0	20.3826	0	0	78.0337	0	0	0	23.7938	0	0	0	0	0	0	19.4191	0	0	0	43.8244	50.4998	0	22.4213	0	8.54782	0	22.1346	0	0	33.3333	0	33.3333	0	33.3333	0	33.3333	0	0	0	15.7564	0	0	9.81408
0	0	33.3333	0	0	0	20.7915	0	61.074	33.3333	0	0	0	0	6.66667	0	0	0	0	33.3333	0	0	0	0	33.3333	0	0	0	0	0	0	47.8967	35.7059	33.3333	70.5031	0	0	26.1065	26.0102	56.4782	33.3333	31.8632	0	45.69	0	66.6667	12.6643	0	28.7306	0
44.9886	0	0	0	0	0	0	50	0	0	0	0	11.9513	0	33.3333	0	0	33.3333	33.3333	33.3333	21.9894	0	66.6667	0	14.6714	24.6836	0	0	60.6921	0	33.3333	0	33.3333	33.3333	0	33.3333	0	20.0533	33.3333	0	0	0	0	0	66.6667	0	0	0	0	0
0	66.6667	0	0	0	24.763	0	0	0	0	33.3333	14.2041	0	6.99816	0	0	0	10.9437	0	0	33.3333	0	0	0	33.3333	33.3333	22.843	0	0	0	33.3333	0	0	11.1988	0	0	3.12346	33.3333	0	0	0	33.3333	0	0	0	33.3333	0	0	0	4.79599
21.6781	0	0	33.3333	0	33.3333	15.3497	50	12.9508	0	66.6667	0	0	33.3333	33.3333	41.1565	0	0	0	33.3333	33.3333	6.06162	13.9142	0	18.662	9.80926	17.8713	13.2963	17.0604	2.54317	0	39.7463	6.92834	0	0	0	0	7.22683	0	10.9992	33.3333	0	0	33.3333	0	0	50.9103	42.6311	33.3333	0
0	0	0	0	33.3333	0	0	0	5.59272	33.3333	0	7.76222	33.3333	0	0	0	0	0	33.3333	0	11.344	33.3333	0	33.3333	0	8.64971	0	0	22.2475	10.912	33.3333	0	24.0325	0	0	0	33.3333	0	0	10.1885	0	0	43.5127	0	0	0	0	0	33.3333	54.1083
0	0	0	0	0	0	12.5419	0	0	0	0	0	0	0	0	33.3333	0	0	0	0	0	33.3333	0	33.3333	0	0	0	0	0	0	0	0	0	0	29.4969	0	0	0	0	0	0	0	0	0	0	0	5.45084	0	0	0
0	0	7.96536	0	0	8.57037	0	0	0	0	0	0	21.382	26.3352	10.5256	1.71638	0	0	0	0	0	0	0	0	0	0	15.4612	16.1669	0	0	0	3.80924	0	0	0	0	0	13.28	7.32313	0	0	15.003	0	0	0	0	0	24.0355	4.60276	18.7233
28.9378	39.5288	12.253	25.1599	0	0	5.82121	0	25.3926	0	30.0224	27.9383	21.8167	26.0632	39.1779	0	0	33.7431	26.7057	19.6497	18.2349	15.3482	58.5783	0	19.9563	16.9739	23.3225	0	48.1541	20.5089	0	42.2873	33.3333	41.2244	45.8106	15.8634	25.3904	22.6295	24.4389	52.073	65.4091	17.6532	15.7342	40.4563	0	14.1184	5.36513	0	0	5.87992
0	19.6479	0	20.4554	20.8305	16.8417	28.8507	20.0556	48.5057	39.792	23.6283	7.54887	17.8872	0	0	22.2834	56.8038	8.36017	31.9205	42.143	21.5512	0	0	20.5033	10.0097	19.6605	30.2206	0	0	12.6113	32.2836	0	33.3333	0	0	15.3981	8.1982	20.6835	26.5057	26.4892	0	0	14.6976	0	91.9095	44.0318	13.5459	17.2791	0	17.0311
29.9986	0	20.4026	20.6975	20.5263	56.7894	20.7809	0	0	19.9408	10.2475	0	0	0	20.6168	33.3333	0	0	0	0	33.3333	21.0654	0	0	0	23.6005	22.2294	80.6814	13.4309	20.4812	7.83323	33.3333	33.3333	18.5035	0	30.3002	0	0	16.7161	0	0	15.1961	16.7788	54.9302	0	0	0	0	44.8038	27.4534
0	7.17233	21.57	0	33.3333	0	0	37.3237	0	0	0	0	17.9961	27.2285	6.49185	0	0	0	0	0	0	0	0	16.0913	33.3333	0	0	0	0	0	0	0	0	0	11.5327	0	16.2348	33.3333	8.89447	0	9.92605	0	0	0	0	15.3079	13.3466	33.8622	0	0
20.0461	0	4.92504	5.49041	6.89026	0	0	0	13.0086	9.84836	0	0	0	0	0	11.0499	0	24.9732	15.7882	18.98	7.11545	8.85279	21.1742	0	17.6406	10.7538	0	0	11.174	5.60933	25.5001	19.0513	0	18.6633	24.5025	0	0	12.6499	0	14.5936	0	7.20405	17.5991	0	0	17.0355	33.3333	0	33.3333	0
0	0	0	6.88192	0	0	0	0	0	0	18.1356	29.686	11.5167	33.3333	6.26128	24.6249	0	0	0	4.94037	0	16.0996	0	0	0	9.65844	10.0108	0	0	20.722	0	0	0	14.4253	0	0	33.0781	0	23.4449	0	0	33.3333	29.5728	0	0	0	5.44234	11.9465	0	16.3022
0	13.6854	0	12.8779	0	26.3689	12.5525	3.14313	5.15235	13.4752	0	19.8664	15.3372	0	8.33106	0	43.1962	0	25.5856	0	0	0	0	37.7645	10.9616	0	14.2166	14.6703	12.8268	12.8521	22.925	0	0	0	8.60912	35.4051	0	10.7039	0	0	14.9355	6.17247	0	0	0	5.59938	0	22.1808	21.8628	33.3333
0	19.9655	11.7634	2.68301	5.61259	0	31.9947	0	7.9407	16.9437	0	0	15.4461	6.10482	0	0	0	17.7363	0	6.18926	19.7652	17.9851	12.0182	0	0	9.73288	0	0	0	7.21513	0	0	0	0	0	0	17.0985	0	0	6.84415	0	0	0	0	8.09055	0	0	10.6237	0	0
12.6755	0	29.086	5.75391	12.8071	0	0	0	0	0	8.2612	0	0	7.27018	19.1211	8.70843	0	15.1872	0	0	0	20.6488	8.22935	16.3146	8.09848	9.62	0	4.64834	14.4142	0	11.4581	5.32812	0	0	0	0	0	0	0	0	9.72929	0	0	4.6135	0	0	14.3451	0	0	0
8.34195	0	0	0	0	0	0	39.4775	0	0	9.70503	14.9605	0	0	0	0	0	0	0	8.09767	0	0	0	9.32628	0	0	0	0	0	0	0	0	0	7.18349	9.54507	3.03312	0	0	0	0	0	20.4409	5.61748	0	0	3.90704	14.6216	4.10778	0	0
0	0	0	0	1.46475	0	9.52373	0	21.8706	2.36412	0	0	7.62657	0	0	8.16822	0	0	11.357	8.92825	8.37756	0	11.0459	0	10.9466	0	9.13934	3.58991	13.8321	0	0	17.7377	8.72225	11.0807	8.76554	0	4.93318	23.9349	14.854	4.12178	12.6289	0	7.23982	17.038	0	6.23635	0	0	37.9038	38.3092
1.43947	0	2.38923	0	0	0	0	9.54104	5.72443	0	0	7.78931	0	0	0	0	0	0	16.8768	0	0	6.02022	0	0	1.40301	0	19.9523	0	15.2169	0.547653	0	13.4832	16.0225	0	17.1322	0.715191	5.40943	0	0	0	0	0	0	14.13	10.9767	6.36012	0	0	0	21.5101
0	0	0	0	0	7.97223	0	0	0	4.37458	0	0	0	1.29026	0.397354	0	0	0.874295	0	0	0	18.3816	0	2.05326	8.48686	0	0	1.11567	0	1.18729	0	0	0	0	14.1834	0	5.72195	20.5063	8.60794	14.6428	0	28.096	0	0	4.34417	0	0	4.77204	0	0
0	0	9.34899	0	4.83289	0	0	0	0	0	0	2.73435	0	5.65046	0	0	0	0	0	0	14.575	0	0	2.79593	7.20339	2.78855	0	6.50109	0	0	0	0	0	0	0	0	0	0	13.6832	0	4.85717	0	0	0	0	13.5421	13.7225	14.6438	15.466	0
6.50213	7.25036	0	0	0	13.487	0	25.2517	12.8704	0	13.0762	12.0132	17.9889	14.102	0	13.3866	12.4353	2.57475	0	6.00407	0	0	15.5856	0	0	7.2338	9.01075	5.963	9.69078	4.51364	3.35706	17.8967	6.59355	17.896	11.2072	7.09426	0	9.53689	0	11.8136	8.44836	0	11.6607	12.4811	9.33313	2.92938	24.891	0	11.4368	8.33333
3.05108	0	2.46007	1.69336	5.98342	8.75953	4.68605	0	6.93574	28.3204	9.0593	3.63478	0	4.11373	5.24458	0	0	0	3.54497	7.98688	4.28636	2.45162	0	2.88739	0	2.37016	5.68632	4.27673	11.5775	3.38801	0	0	0	11.8717	0	0	0	0	0	10.6105	6.89179	18.5879	0	0	0	0	0	14.0153	0	0
0	0	0	0	0	0	0	0	0	0	0	0	0	0	0	0	0	0	0	0	0	0	0	0	0	0	0	0	0	0	0	0	0	0	0	0	14.9049	21.9965	0	0	0	0	0	0	0	0	0	0	0	0
30.7538	28.7821	0	0	0	0	0	0	0	0	0	0	0	0	0	0	87.5647	0	0	0	16.4148	0	0	0	0	0	0	0	0	0	0	0	0	0	0	0	0	11.1983	0	0	0	14.7454	0	0	0	0	0	0	26.2118	11.8232
58.2535	63.9675	85.8017	98.3066	87.7189	69.7813	85.7902	65.2073	31.0841	64.9409	50.9221	73.8284	56.2702	74.8435	66.6667	78.4452	0	96.551	40.6667	77.0808	56.3462	73.1466	73.3685	92.2634	71.9601	87.6075	56.2113	78.5536	49.6827	90.3634	96.6429	50.8824	68.6617	59.1515	32.5106	92.1906	69.0306	12.827	62.8548	58.8113	67.1738	38.5707	47.7662	56.3509	75.346	70.9321	61.3865	28.5613	8.98161	20.0241
0	0	0	0	0	0	0	0	21.5147	0	26.9425	0	18.1143	0	27.6914	0	0	0	27.5545	0	0	0	0	0	0	0	0	0	0	0	0	0	0	0	16.2012	0	0	0	0	0	0	0	33.3333	0	0	0	0	38.0076	0	0
0	0	0	0	0	0	0	0	0	0	0	0	0	0	0	0	0	0	0	0	6.2665	0	0	0	0	0	0	0	0	0	0	0	0	0	0	0	0	0	0	0	0	26.652	0	0	0	0	0	0	0	0
0	0	0	0	0	0	33.3333	50	21.7909	21.2868	0	0	13.219	0	0	15.329	0	0	0	22.414	0	51.9359	33.3333	0	0	0	0	33.3333	11.4358	0	0	9.05094	0	0	20.0011	18.9975	12.6698	43.5676	0	0	0	0	33.3333	0	0	0	33.3333	0	37.4961	11.4688
0	0	33.3333	0	0	0	29.726	0	0	0	0	0	0	0	0	0	0	0	33.3333	0	0	0	0	0	52.6857	0	0	0	0	0	33.3333	9.0306	0	48.897	0	0	60.8996	14.3662	0	22.3488	0	41.6609	66.6667	0	100	11.5077	54.927	62.0442	0	0
0	0	33.3333	33.3333	0	33.5523	33.3333	0	12.1523	33.3333	66.6667	59.9876	31.0838	14.1226	33.3333	0	100	0	33.3333	0	27.0668	33.3333	52.5138	33.3333	0	0	0	23.4802	0	0	0	33.3333	16.8301	22.1209	3.36254	0	0	0	39.0086	0	8.30818	0	0	36.7678	0	50.9942	0	0	0	0
0	33.3333	33.3333	0	33.3333	0	0	0	33.3333	0	0	0	20.1143	0	33.3333	84.671	0	0	0	0	0	0	0	0	0	44.1634	0	0	42.4288	0	0	0	9.00362	0	28.1231	0	0	0	0	0	34.7595	25.0058	0	33.3333	0	0	0	0	0	16.3842
33.3333	0	0	0	33.3333	0	0	0	11.5425	45.3799	33.3333	0	33.3333	0	0	0	0	0	0	50.4454	0	0	0	0	33.3333	0	33.3333	33.3333	0	0	0	24.2824	0	17.7697	0	33.3333	0	0	33.3333	66.6667	0	0	0	0	0	15.6724	0	33.3333	42.8699	26.6006
0	33.3333	0	0	33.3333	19.1475	3.60738	50	21.181	0	0	6.67904	0	0	0	0	0	0	33.3333	0	0	14.7307	14.1529	33.3333	0	0	28.5309	0	0	0	0	0	49.8366	0	0	47.6692	0	5.93427	15.5821	0	20.8071	0	0	29.8989	0	21.8257	11.7397	0	19.634	21.8645
0	0	0	0	0	13.9669	0	0	0	0	0	0	0	52.544	0	0	0	0	0	10.9193	33.3333	0	0	0	0	0	33.3333	9.85316	33.3333	0	0	24.3027	0	11.2125	36.8721	0	26.4306	0	12.0759	10.9846	0	6.68131	0	0	0	0	0	4.62247	0	16.9492
0	33.3333	0	0	0	0	0	0	0	0	0	0	2.24953	0	0	0	0	0	0	0	0	0	0	0	13.981	0	0	0	12.802	0	0	0	0	0	0	0	0	23.0991	0	0	0	0	0	0	0	0	0	0	0	0
0	0	0	0	0	0	0	0	0	0	0	0	0	0	33.3333	0	0	0	0	16.2213	0	0	0	0	0	22.5032	4.80242	0	0	0	0	0	24.3297	0	11.6411	0	0	13.0329	0	0	36.1252	0	0	0	0	0	0	0	0	6.73276
21.3246	12.1302	45.416	29.7549	31.4163	29.4545	53.6071	50	30.6936	68.2128	34.9547	12.5821	31.6083	57.2683	15.939	0	65.5547	0	51.6628	6.60931	32.4819	13.9818	18.6847	0	0	24.6606	36.7155	60.6532	29.9667	25.1305	0	29.7596	0	35.6198	50.1088	0	15.2585	25.6197	13.0967	24.349	0	1.8524	12.2773	33.3333	41.6412	43.461	12.2997	8.68869	26.0235	18.9292
41.328	50.0156	16.7061	65.1671	14.9098	24.8139	0	0	27.4775	0	33.3333	0	33.3333	0	24.5984	49.4798	0	73.7392	19.1074	0	0	18.9802	57.8173	0	21.7991	0	0	0	14.2895	0	10.8651	0	52.3674	0	0	80.2118	0	0	49.5659	66.6667	22.9306	0	29.9426	58.4644	0	28.3743	33.3333	13.2344	0	0
0	0	0	0	0	0	0	42.797	18.704	0	0	18.1095	22.9065	25.5103	21.2032	24.7679	0	0	0	25.2995	53.8805	19.4031	0	33.2571	53.942	29.35	25.9259	13.8777	0	26.0591	0	0	0	33.3333	20.5598	0	44.0281	0	20.2366	0	12.6268	38.0929	33.3333	0	26.0763	0	13.2221	20.2066	41.58	40.3307
0	21.2031	10.1655	0	20.2765	16.6453	0	0	0	12.9498	0	23.2962	0	0	0	0	0	0	0	48.7205	13.6376	10.1299	0	13.8995	0	0	0	0	24.5463	11.2389	0	45.6885	0	18.9931	0	0	0	29.4872	0	0	0	6.78232	0	0	0	12.18	0	0	0	0
0	0	0	0	5.73455	14.8616	0	0	17.269	13.8025	0	0	4.24791	0	17.3943	0	34.4453	0	0	0	0	0	8.12492	0	0	33.3333	19.1856	12.0227	12.1537	4.88855	33.4604	2.97353	0	0	0	11.982	0	0	0	0	33.3333	0	0	0	8.58025	0	9.78566	24.6446	0	0
37.3474	0	7.23487	0	6.8681	0	25.9662	0	5.85586	0	0	0	0	0	0	8.1142	0	9.75023	29.2298	0	0	7.95067	8.84934	0	11.5342	0	0	13.4465	0	0	0	0	33.3333	0	0	0	4.43286	0	0	0	0	5.97642	0	0	0	8.9407	0	13.1268	0	0
0	16.651	0	1.49959	0	0	0	7.20303	0	0	0	8.47491	0	9.39835	0	0	0	0	0	0	0	0	0	10.643	12.7246	3.98336	10.7655	0	0	0	0	0	8.4125	0	12.7735	0	23.6918	7.71365	17.1007	0	0	13.9371	21.0561	0	4.38077	4.95907	6.01198	0	0	21.7006
0	0	20.4776	3.5784	12.6889	0	0	0	0	0	19.7981	15.2239	7.9039	0	8.73491	17.6381	0	0	0	11.3369	0	0	0	8.25126	0	0	7.40741	0	19.0438	0	44.8323	0	5.88675	12.0538	0	3.89301	0	3.84615	0	8.98431	10.4027	0	3.39074	0	7.25699	2.08498	11.248	0	0	0
0	0	0	0	8.10581	0	20.4267	0	0	5.03486	11.9139	0	0	0	12.1302	0	0	5.92576	0	0	0	20.3327	0	19.4338	0	0	0	0	0	22.6829	0	4.05656	0	0	0	3.91321	12.5887	0	0	0	0	22.5973	0	0	0	0	0	20.099	25.0867	19.0395
0	0	0	0	0	14.2247	0	0	0	0	0	22.3135	0	7.82306	0	0	0	10.5848	0	8.0338	0	9.22157	6.52375	14.5153	0	8.67275	0	0	0	10	10.8422	17.5218	0	0	16.5579	0	0	0	0	0	20.7065	10.7615	0	8.20222	12.0645	0	14.0993	0	7.30983	0
28.4588	0	15.8228	20.0809	14.1249	7.94603	0	7.80555	48.537	12.5079	33.2687	0	56.5533	17.7995	0	22.0127	0	6.02532	27.6586	12.1131	18.2913	0	18.0404	7.17826	35.237	0	40.2727	16.7506	28.3548	0	0	22.5796	5.72229	37.5785	20.5405	16.3088	16.8428	22.7012	13.578	36.8936	0	16.1929	29.6049	25.0371	10.0557	27.8567	23.8329	20.3858	0	11.5576
0	9.86198	0	0	0	0	13.4227	0	0	7.99691	17.1619	2.14026	0	0	46.1058	0	46.8174	0	19.1086	21.4041	0	0	0	0	0	3.97385	0	48.2219	0	0	28.3689	0	18.158	0	0	0	8.07938	28.0507	0	0	19.0132	0	8.64841	33.3333	12.5038	10.8152	12.5333	10.302	33.3333	0
4.51597	18.5875	11.8324	18.2616	23.9736	12.584	10.1556	24.2486	19.6685	0	0	0	0	0	0	7.76183	0	0	0	0	33.3333	7.80177	5.08445	0	19.7669	0	0	0	37.9204	31.0268	0	0	37.8217	0	3.74228	15.0991	0	0	16.5425	0	19.0053	0	0	0	0	0	12.9766	0	0	13.9935
0	0	9.93778	0	0	12.2963	28.4787	0	0	0	0	10.6491	0	43.0018	0	3.01392	0	16.2304	0	6.10948	0	0	18.8181	34.5264	0	6.84143	5.42458	0	0	0	0	29.1074	0	0	0	0	0	0	0	21.4536	0	0	0	21.1874	0	0	0	0	13.4643	34.154
0	0	12.9086	6.739	31.6082	0	0	0	5.29704	42.9571	1.62991	15.9324	6.10119	9.48819	9.20197	10.1484	35.9575	0	15.8512	0	20.9955	0	28.2489	4.39122	0	1.02835	17.359	0	0	0	14.6843	13.945	0	35.2357	12.9349	14.4201	25.0861	24.0304	20.0864	0	9.04239	0	0	0	28.1743	5.26263	6.38821	16.3466	0	19.3398
0	0	21.501	0	0	0	23.1777	0	6.40647	0	16.1714	10.2081	0	0	7.89374	0	0	0	0	16.7627	0	33.3333	0	0	5.01267	0	0	4.79716	7.22138	0	11.5308	16.4496	8.89587	7.09596	0	0	0	0	19.7554	0	0	8.33144	0	0	33.3333	31.3827	0	0	33.3333	0
0	29.2628	0	0	0	20.7493	19.9106	19.4204	0	0	24.5453	0	16.8524	0	0	19.1449	0	0	0	11.9293	0	0	0	0	18.9355	0	8.7208	0	0	0	0	0	0	0	57.4653	0	33.2241	0	0	29.3603	28.6481	21.0049	9.38722	0	0	0	0	12.9475	19.8691	0
28.8174	0	17.8879	16.9259	9.35977	0	0	23.4629	13.6648	24.6499	0	15.2607	13.5126	0	14.0092	0	0	56.6945	27.2366	15.1108	18.4648	33.3333	15.2929	53.9041	13.5664	61.6645	28.2229	21.2046	0	19.6804	0	0	0	0	0	35.2588	0	7.64254	0	12.2925	0	33.3333	15.0805	12.146	0	9.30697	20.3567	0	0	20.9551
38.2079	42.2878	10.1096	37.9927	20.9336	46.4243	4.85468	0	6.42618	11.8882	0	45.8095	6.98052	29.7106	22.7893	37.9183	17.2251	21.0498	10.1449	16.5706	8.91509	25.5316	14.5152	0	7.48146	26.4919	0	9.02577	26.5035	49.2927	45.416	17.9184	29.4021	20.0898	0	18.9132	8.24726	17.5751	30.0377	0	24.2909	0	21.9812	8.29626	15.9329	15.3758	23.9122	40.0181	0	0
0	0	0	0	0	0	0	25.0626	0	0	7.22275	0	0	0	0	0	0	0	0	0	0	0	0	0	0	0	0	0	0	0	0	0	0	0	5.31706	0	8.52036	0	0	0	0	21.1375	15.2977	0	0	0	0	0	0	0
0	0	0	0	0	0	0	0	0	0	0	0	0	0	0	0	0	0	0	0	0	11.3773	0	0	0	0	0	0	0	0	0	0	0	0	2.03883	0	0	0	0	0	0	0	0	0	0	0	0	3.02411	0	0
44.4898	47.5466	16.0109	33.1655	32.5357	13.1993	0	0	26.0071	21.7044	56.1087	16.1167	5.24078	10.6567	26.1425	18.872	0	62.0262	38.6867	23.4571	11.995	13.7973	0	0	3.09219	61.8763	6.56682	8.13187	18.4615	57.1307	8.80223	6.87919	8.43359	4.02281	12.4593	9.52272	11.3129	0	2.0345	8.59151	0	0	14.8685	0	0	0	0	25.6936	12.4137	14.8616
0	0	28.962	0	0	0	16.4246	0	0	0	0	0	0	0	0	0	0	0	0	0	10.8393	33.3333	21.1083	33.3333	0	0	33.3333	0	12.8093	0	0	7.99374	0	12.7402	0	38.9969	17.253	12.0096	5.37531	6.30944	0	23.8225	0	0	12.8918	5.874	13.7645	0	0	0
0	20.2735	0	0	0	0	0	0	33.0668	24.3902	0	0	0	28.9648	0	17.9792	80.6747	0	0	0	0	0	14.6662	33.3333	22.2877	0	0	0	0	0	33.3333	0	0	8.86005	5.46591	0	0	21.1453	0	0	0	0	60.3062	0	0	0	23.3772	0	0	0
15.9209	32.1799	25.7044	66.8345	38.1102	66.6667	33.3333	46.1128	0	35.623	14.7752	52.8676	43.9149	25.3472	31.7961	22.5077	0	30.8287	14.4313	41.3424	54.6717	32.902	0	17.4569	0	28.9404	33.3333	0	0	28.7663	14.6518	10.023	12.9639	0	0	33.7345	0	0	0	0	0	0	11.8272	0	18.5672	0	28.2878	30.3092	19.6536	0
22.1769	0	24.9514	0	0	0	23.5924	26.8717	12.7076	0	0	15.1304	33.3333	22.6766	25.942	25.2869	0	0	33.3333	23.2953	0	0	33.3333	0	10.8186	0	17.0955	66.6667	28.3633	14.103	33.3333	0	33.3333	16.3869	0	0	46.4065	0	26.696	26.3966	0	66.6667	0	0	0	7.13615	0	15.5061	33.3333	0
17.4125	0	0	0	23.4333	20.1341	16.9087	0	0	8.94309	29.1161	0	0	0	0	0	0	0	0	0	13.8619	0	18.6671	0	44.3789	9.18333	0	25.2015	0	0	0	25.3396	30.2601	20.5932	13.4124	0	16.0803	0	27.958	27.0239	66.6667	0	0	0	33.3333	0	9.95609	25.467	22.4745	31.9829
0	0	4.37133	0	0	0	0	27.0155	0	7.5553	0	0	0	4.36851	0	0	19.3253	7.14507	0	3.97335	0	0	12.225	0	0	0	0	0	14.8718	0	0	23.3104	0	0	19.0454	0	0	39.302	31.2988	24.7418	0	0	0	22.7067	35.2076	27.4593	0	0	0	0
0	0	0	0	5.92071	0	0	0	17.5289	1.78404	0	0	17.5109	0	0	0	0	0	0	7.93198	0	8.59007	0	0	19.4226	0	0	0	25.4941	0	0	26.4541	15.0091	24.4733	7.46165	0	0	27.5431	0	0	0	9.5108	0	33.3333	0	33.3333	15.4876	0	0	33.3333
0	0	0	0	0	0	9.74097	0	10.6897	0	0	15.8853	0	7.98611	16.1195	15.3541	0	0	13.5488	0	8.63208	0	0	15.8764	0	0	9.67102	0	0	0	9.87929	0	0	12.9237	40.1165	17.7459	8.94722	0	6.63736	6.93677	33.3333	0	12.9981	43.96	0	26.1972	9.12678	0	12.1249	19.8222
63.4737	16.2222	43.2325	0	26.5464	54.6573	43.5075	0	0	51.7799	17.5335	3.0468	0	27.9805	0	16.5776	0	22.5036	15.2418	0	0	27.0622	55.3905	37.9884	0	43.8793	13.5802	21.8325	23.9445	40.9718	33.3871	16.1287	0	0	0	33.3333	17.0435	0	0	0	0	0	0	0	14.9517	0	21.1924	61.8189	17.585	0
0	47.4659	27.3338	60.8443	0	0	0	46.0147	0	0	33.3333	0	20.8198	12.2767	40.9696	0	84.4562	33.3333	33.3333	20.8438	17.1279	0	0	0	44.9271	33.3333	0	27.7293	14.1867	33.3333	0	0	33.3333	0	0	24.0514	21.1863	0	20.7345	5.76923	33.3333	17.4603	7.29072	0	33.3333	0	29.0753	0	0	14.9467
0	0	0	0	27.7003	0	0	0	19.0188	0	0	46.4899	38.5483	0	0	34.6762	0	33.3333	0	0	0	0	0	0	0	0	0	0	0	0	0	19.3084	0	9.48521	20.6695	0	33.3333	12.2928	0	33.3333	45.922	59.323	15.1318	0	33.3333	33.3333	0	0	12.4504	0
0	0	0	0	13.32	22.0018	0	0	56.8262	33.3333	18.4826	0	0	5.87985	0	0	0	0	5.72307	66.6667	66.6667	7.60389	0	31.0097	0	0	48.3686	0	0	0	2.31359	10	33.3333	0	0	0	0	57.1612	0	27.5641	0	0	0	0	0	0	14.2803	15.9172	19.9347	0
19.259	0	0	0	0	0	0	0	0	14.8867	18.8367	0	0	12.1985	0	0	0	0	0	0	16.2055	42.5706	8.56898	0	39.3768	0	0	17.1699	0	0	0	0	33.3333	66.6667	33.3333	0	0	0	0	0	0	15.873	0	0	18.3816	0	4.25801	0	0	33.3333
17.2672	17.1111	16.9477	18.9228	23.8422	0	15.5989	53.9853	7.28607	0	0	0	13.2098	0	33.3333	22.7965	0	0	0	0	0	0	0	18.0945	0	14.7963	19.7531	0	19.1467	9.77961	64.2993	14.025	0	23.8481	0	9.28191	0	0	33.3333	0	0	0	0	0	0	0	12.1409	0	0	33.3333
0	0	5.99958	12.6126	8.59112	23.3409	40.8936	0	0	0	0	33.3333	12.5136	0	12.1714	9.19403	15.5438	0	33.3333	0	0	0	32.0394	10.5837	13.7246	7.99105	18.2981	21.7675	9.38878	0	0	40.538	0	0	0	33.3333	28.4369	5.91711	0	33.3333	0	7.34371	52.3511	100	0	33.3333	19.053	6.60639	20.883	18.3866
0	11.5163	6.48654	0	0	0	0	0	9.84048	0	11.8138	17.13	14.9085	41.6645	13.5257	16.7557	0	10.8297	0	12.4896	0	12.3427	0	0	1.97148	0	0	11.5009	0	15.9152	0	0	0	0	45.9972	0	0	0	12.5988	0	20.7447	0	0	0	0	0	0	15.6575	15.7483	0
0	0	0	7.62025	0	0	0	0	0	0	0	0	0	0	0	0	0	0	0	0	0	10.4206	0	2.32363	0	0	0	0	0	0	0	0	0	0	0	0	0	0	0	0	0	0	0	0	0	0	0	0	0	0
0	7.68445	0	0	0	0	0	0	7.02845	0	0	0	0	0	0	0	0	0	12.3685	0	0	0	4.00105	0	0	0	0	0	33.3333	0	0	0	0	0	0	0	0	24.6289	0	0	0	0	25.2264	0	0	0	0	0	13.3986	0
19.9363	20.041	41.1372	6.98318	42.2434	39.6185	57.8208	66.6492	5.06141	62.6036	29.9078	61.158	24.1271	11.1563	18.8999	43.9571	0	23.8879	12.0445	15.4837	39.391	16.2099	11.3816	16.3997	26.3538	32.856	53.734	4.3344	18.2963	35.984	33.4233	26.8118	9.91144	19.4026	53.021	0	24.2791	0	0	25.435	13.7699	66.5838	4.23717	69.7419	20.6252	20.1577	17.1149	27.0039	3.82561	64.0802
12.9674	12.7868	23.888	46.2433	15.1006	0	0	0	26.6375	0	19.6141	0	18.9172	42.0544	0	0	30.0975	0	22.3829	26.5128	0	11.1637	33.9167	0	28.9152	16.2155	0	43.9	0	0	18.5072	14.2179	45.3653	18.1536	8.53689	19.7967	18.0864	33.3333	64.3583	0	25.1878	0	13.6796	0	20.853	66.6667	23.5508	15.9712	0	0
0	0	0	0	0	0	0	0	14.7004	0	0	8.43124	0	0	42.658	0	0	16.9744	18.9819	0	0	0	0	24.6882	0	0	0	0	0	0	0	0	0	14.7025	0	19.3447	0	0	27.9585	31.2344	33.3333	0	25.987	0	0.943171	0	14.0396	0	19.9891	0
0	9.48675	0	17.2006	0	10.5161	0	5.05691	10.5255	0	0	0	7.80869	0	0	10.8087	0	24.0456	18.7274	0	9.97991	0	0	16.4552	0	11.7526	18.6911	28.9989	38.8179	0	0	13.5802	12.1821	0	0	19.6859	14.6508	33.3333	0	0	0	0	21.3468	0	0	0	0	0	33.3333	0
33.3333	10.8825	12.5359	0	18.1517	0	0	0	0	0	0	0	0	11.6787	0	0	24.5874	0	10.9505	0	6.05181	8.87687	3.40113	0	17.1778	10.1466	17.9912	0	33.3333	16.7088	14.8261	0	0	0	13.6457	13.9886	0	0	0	13.7875	0	16.0634	15.9229	0	16.7055	13.1757	12.7763	14.3052	9.16703	14.6542
0	0	0	14.0848	6.27159	0	32.3943	0	0	7.45679	21.3009	13.8436	14.4161	5.18569	14.4334	0	0	25.8044	0	32.9645	0	11.8152	0	0	0	0	0	0	0	0	18.1626	0	4.02457	0	0	0	6.88282	33.3333	0	0	0	0	0	20.0266	0	0	0	0	0	10.6456
11.2061	34.8725	0	0	0	19.866	0	0	0	11.4498	18.4747	5.32135	19.0647	0	15.3716	9.22592	0	0	0	0	38.5925	18.3523	0	16.9337	11.4329	0	0	6.81718	0	15.5155	0	15.4367	0	32.5615	0	13.6474	15.2469	0	7.68317	0	0	17.3528	0	9.3021	12.4803	0	16.2184	17.3621	0	10.6199
13.3971	0	12.9936	0	0	17.782	9.78495	28.2939	0	18.4898	0	0	15.6662	22.177	8.63705	0	45.3151	0	14.3515	16.8914	0	0	32.7499	0	0	13.3983	9.58374	15.9495	0	22.543	15.0808	19.1154	17.2768	0	0	13.5367	0	0	0	15.7744	27.709	0	0	0	0	0	16.2999	0	0	0
0	2.40987	9.44534	6.33854	18.2327	12.2174	0	0	22.8078	0	10.7025	0	0	7.74788	0	36.0083	0	9.28778	0	0	5.98481	13.2928	18.5506	25.5233	6.05963	15.631	0	0	9.55242	9.24874	0	10.838	0	15.1797	24.7964	0	0	0	0	2.09897	0	0	6.83998	0.929424	15.2459	0	0	0	33.6849	0
9.15983	9.52064	0	9.14957	0	0	0	0	20.2673	0	0	11.2457	0	0	0	0	0	0	2.56137	8.14754	0	20.2893	0	0	10.0606	0	0	0	0	0	0	0	11.2398	0	0	0	20.854	0	0	11.6698	0	0	11.9865	0	13.1468	0	0	25.3576	0	0
0	0	0	0	0	0	11.7507	8.59117	0	0	0	0	0	0	0	0	0	0	0	0	0	0	0	0	0	0	23.9182	0	16.9923	0	0	8.07358	2.4585	0	13.3782	0	10.4203	30.3059	5.40714	0	4.17732	10.5824	0	3.75028	0	8.49917	0	0	0	19.5662
0	0	0	0	9.38713	24.6686	0	10.8397	0	0	0	8.52029	9.09267	0	4.81983	3.82855	0	0	19.2533	0	0	0	0	0	5.46987	0	0	4.22094	0	0	0	0	0	0	4.92154	1.97722	0	0	6.38914	19.7147	0	11.743	0	0	0	0	0	14.0999	0	0
3.91988	2.35648	2.88094	7.41477	0	0	16.3042	5.24181	0	0.689088	17.206	0	2.74888	2.80935	0	0	36.9082	0.862123	0	0	4.08473	0	2.5408	2.41692	7.76713	0	0	8.39099	10.6356	0	0	12.6018	0	15.2097	0	0.413673	0	0	0	0	16.559	0	0	3.02311	6.62074	14.7639	47.1272	0	11.4792	0
0	0	6.45338	0	0	0	8.64145	0	0	0	11.027	0	0	5.99231	0	0	0	0	0	0	0	2.14005	0	0	0	2.15701	3.8732	0	0	0	0	5.28746	0	0	0	7.7556	6.11492	0	12.7956	0	0	0	0	10.6398	0	0	0	0	7.37965	18.2292
0	0	0	0	0	0	0	0	0	0	0	0	0	0	0	0	0	0	0	0	0	0	0	0	0	0	0	0	8.59821	0	0	0	0	7.00861	26.0807	0	0	14.9072	2.65549	0	0	0	8.66902	8.75252	8.94805	0	0	25.7219	0	14.9058
0	0	0	0	0	0	0	0	0	0	0	0	0	0	0	0	0	0	0	0	0	0	0	0	0	0	14.6972	0	33.3333	0	0	0	0	14.5016	12.5545	0	0	12.3523	0	0	0	0	0	0	0	0	11.4455	0	0	0
42.1231	58.5597	26.6968	29.2529	39.0743	38.3761	21.5826	19.6005	0	9.40039	25.573	59.0926	6.76502	46.8783	28.7702	15.1875	63.0918	66.6745	31.8	18.7494	59.8293	18.6036	9.37822	0	55.625	66.9492	7.72328	58.2757	5.13447	81.8396	33.3333	20.4087	0	0	0	0	18.7669	0	0	0	0	33.3333	66.6667	0	0	0	0	33.3333	0	0
0	0	0	0	0	0	41.7211	19.9975	100	0	11.4392	0	28.348	0	15.0626	29.5048	0	0	28.9216	33.3333	0	33.3333	0	30.9164	0	0	0	29.1124	0	0	0	0	30.8748	0	28.4118	15.4386	0	0	24.2887	19.7588	79.2636	44.3413	0	20.8305	12.3961	0	0	0	28.4064	28.1584
16.6839	23.0798	46.115	29.9057	51.5386	13.915	0	0	0	66.6667	30.0667	0	29.226	27.341	0	0	0	0	9.31711	33.3333	16.3138	0	88.081	66.6667	0	0	49.7882	0	18.2156	0	33.3333	41.7375	66.6667	63.2801	14.6533	64.2758	22.9131	35.963	48.4639	60.5264	0	0	0	53.0038	60.0459	76.737	0	0	26.7811	15.1042
37.2731	16.0041	17.8539	33.4266	0	23.0403	0	35.7293	0	23.2439	4.68806	32.3871	23.8194	16.979	51.3474	51.4792	0	32.4634	10.708	14.584	19.7722	45.9231	0	0	31.138	30.8938	0	0	7.09046	18.1604	33.3333	11.891	0	0	0	10.1391	41.7849	6.47158	0	0	0	0	24.6643	0	11.9891	0	41.4273	26.8449	25.9537	4.03629
0	33.3333	0	0	0	0	0	0	0	0	0	0	0	0	0	0	75.6056	33.3333	0	0	0	0	0	33.3333	0	0	0	0	0	33.3333	33.3333	0	0	0	0	0	33.3333	0	0	0	0	0	22.8391	0	0	0	28.2213	0	0	0
26.4111	0	12.7287	0	20.2719	0	14.3994	0	16.6466	14.8752	0	33.3333	0	0	0	0	0	0	0	0	0	0	0	0	0	20.7987	19.2739	0	7.04508	0	33.3333	0	0	5.38373	0	0	0	0	0	0	0	52.4788	26.4544	0	16.4062	0	0	18.674	13.5987	0
0	0	23.3906	0	0	13.813	33.3333	0	0	0	0	0	0	33.3333	0	0	0	0	0	0	19.3653	0	0	0	20.5124	0	0	6.62589	0	0	0	0	54.2088	33.3333	44.6806	0	8.8486	0	0	47.9549	38.8214	0	0	0	33.3333	58.2689	12.2764	33.3333	0	7.04742
0	0	0	87.5652	33.3333	33.3333	15.9807	0	0	0	0	33.3333	94.6283	0	19.0832	0	0	0	61.1243	33.3333	0	0	26.7736	50.281	33.3333	0	0	0	0	0	18.2152	33.3333	0	14.0243	0	33.3333	0	35.6484	54.8914	33.3333	22.2031	0	0	100	0	0	0	0	33.3333	33.3333
33.3333	0	20.6047	0	0	0	0	0	27.3286	33.3333	0	0	0	33.3333	0	0	0	0	0	33.3333	0	0	0	0	0	18.7017	33.3333	5.86137	27.5019	33.3333	0	41.4757	0	0	0	33.3333	0	0	8.60946	0	0	0	33.3333	0	16.9271	33.3333	33.3333	25.1876	0	0
0	22.4822	0	0	13.0615	19.5203	5.53454	0	16.6867	18.4581	46.9951	0	0	0	30.6823	33.3333	24.3944	0	0	0	33.3333	33.3333	0	0	28.3373	0	0	33.3333	33.3333	33.3333	0	0	14.4329	27.9496	0	0	0	0	0	0	0	14.4933	0	0	33.3333	0	0	0	4.64345	0
40.2556	33.3333	0	0	0	33.3333	0	50	0	0	33.3333	0	5.37174	33.3333	0	33.3333	0	33.3333	33.3333	33.3333	13.968	0	0	0	0	12.5347	14.0594	20.8461	0	0	15.1181	0	0	19.3091	30.184	0	0	28.1993	11.7753	0	14.1317	19.2533	0	0	0	0	5.11202	0	0	45.3244
0	0	9.9427	12.4348	0	0	17.3526	0	6.00473	0	0	0	0	0	0	0	0	0	0	0	0	0	39.893	0	0	14.6316	0	0	32.1197	0	0	25.191	12.4579	0	25.1355	33.3333	0	33.3333	24.7239	18.7117	24.8438	0	6.87889	0	0	0	21.057	0	33.3333	0
0	10.8511	0	0	0	0	0	50	0	33.3333	0	0	0	0	0	0	0	0	0	0	0	0	0	0	0	0	0	0	0	0	0	0	0	0	0	0	57.8181	2.81896	0	0	0	13.7745	10.4942	0	0	8.3978	0	8.14577	0	0
0	0	0	0	0	0	13.3994	0	0	0	19.6716	0	0	0	16.9011	33.3333	0	0	5.54238	0	0	33.3333	0	16.3856	17.8169	0	0	0	0	0	0	0	18.9005	0	0	0	0	0	0	0	0	0	0	0	0	0	0	14.6593	15.0912	14.2949
40.2062	25.7855	34.5521	16.5164	16.2227	18.818	0	42.5173	25.6306	19.3236	33.3333	27.0896	35.4499	52.3094	28.0584	0	33.3474	81.0475	0	11.152	0	0	36.1969	37.9588	33.0889	50.5273	13.4919	25.1492	20.3786	35.4148	27.6031	20.0865	0	69.8458	0	70.528	20.8135	0	35.0214	53.4834	14.2541	25.2247	22.4755	22.2502	21.2889	26.9996	0	0	20.712	0
0	66.6667	17.5789	33.3333	54.293	42.1004	0	0	0	20.6545	33.3333	0	28.9665	0	23.1927	33.3981	0	0	20.9841	35.4589	25.406	0	28.5558	0	0	33.3333	52.4514	24.8123	14.2278	28.3503	15.9329	0	27.1122	0	21.6197	0	0	29.3446	33.3333	0	14.2973	4.30078	0	27.704	23.556	33.3333	15.7405	14.592	0	44.4768
0	0	0	6.01345	0	0	49.4154	0	23.6665	0	0	0	6.96743	0	20.6411	14.7183	0	0	66.6667	0	47.9926	23.0426	0	16.7827	11.8593	0	0	8.57545	0	0	0	48.071	66.6667	0	27.7973	0	0	33.3333	0	11.3508	26.6432	0	33.3333	19.8901	33.3333	0	0	11.6068	0	0
0	0	0	0	0	0	30.2161	0	23.4383	0	33.3333	4.15636	0	0	0	0	0	0	0	8.90231	0	16.4392	0	0	14.0077	0	0	0	33.3333	0	5.73021	0	0	0	19.4953	7.76848	63.2257	13.4579	17.5193	11.0568	0	7.62036	22.5666	18.3107	12.0444	33.3333	61.3107	22.2129	17.7062	0
22.3128	0	14.1519	27.3199	12.3737	0	0	0	0	29.0167	0	19.9293	0	0	0	3.62218	66.6526	10.3309	0	0	0	30.9396	24.2784	7.16763	0	7.82552	0	6.79427	12.9547	31.2519	6.11612	0	0	10.4274	0	17.6078	0	0	0	0	19.0792	0	0	0	0	6.33377	0	4.426	0	33.3333
37.481	0	8.82771	0	0	11.2945	0	13.6968	0	0	0	2.7815	0	27.6059	12.6922	0	0	8.62154	0	13.7059	14.8205	10.2908	0	16.5506	7.63446	0	34.0566	0	19.1055	1.82073	0	14.1702	0	12.2611	0	0	0	9.02299	14.126	0	8.66893	0	0	5.62935	0	0	17.5929	0	0	0
0	0	12.1342	0	17.1106	0	5.85305	0	0	12.6788	0	16.2626	0	12.8538	15.4155	8.14593	0	0	0	30.7809	0	2.39378	4.77753	13.2055	14.0841	0	0	7.63824	0	0	33.3333	0	0	7.46572	0	0	0	0	0	18.6658	0	9.07173	0	6.21567	9.77737	0	0	14.3154	3.99137	22.1898
0	4.17215	0	16.8169	0	0	0	32.9007	9.66688	0	0	13.404	4.36686	0	0	0	0	0	12.3493	0	7.92736	16.8941	0	0	0	8.3138	0	8.52103	0	3.16232	0	17.6723	0	0	5.53598	4.09576	3.38471	0	0	5.44323	0	21.4122	0	0	0	0	5.35594	11.1204	0	0
0	0	5.82842	0	0	0	3.11725	10.8853	0	0	0	0	0	7.23087	0	10.0978	0	0	0	0	3.85356	0	0	0	0	0	0	0	0	0	11.2843	0	6.22117	0	0	0	12.5761	0	0	0	6.6901	0	10.7668	0	0	0	0	21.7265	24.2571	0
0	3.37571	6.92669	0	0	27.7872	11.3982	0	17.5977	18.3264	0	16.3766	24.2493	0	0	30.0177	0	0	0	0	0	0	6.19137	8.33471	19.3257	0	0	18.5095	0	0	0	0	0	0	25.5517	0	0	14.8411	0	0	10.3671	32.3702	10.8578	0	0	0	0	0	33.3333	0
29.211	43.7202	9.72973	24.3204	0	0	15.2686	18.4966	14.2476	31.797	17.4792	5.84011	14.8426	24.8795	27.5586	0	0	0	18.6882	0	16.0429	3.10557	23.4733	4.41088	9.46626	10.032	36.2373	4.39179	6.77412	36.6511	45.5716	35.7117	26.4874	15.4029	7.78739	17.9204	17.0395	3.85751	46.0925	54.7879	8.25817	11.9447	7.32883	28.7769	4.42164	39.6209	16.118	10.0191	0	11.3235
14.9912	0	22.4109	12.8814	38.7284	0	0	34.111	14.96	0	9.57411	17.0645	0	0	21.281	17.575	0	33.6944	23.7825	0	9.78876	17.8802	0	22.4369	13.7152	0	0	8.50504	56.357	19.1198	0	0	0	0	0	0	15.4453	19.4478	0	0	20.5213	23.3939	0	21.2954	0	12.8394	36.7893	20.5826	0	49.8462
10.1121	0	0	17.1868	0	22.0599	0	0	0	10.8681	22.9047	0	13.3375	21.621	0	0	93.3086	21.249	13.1514	67.3083	13.3193	5.04767	5.95032	0	0	0	0	31.765	0	0	0	22.8764	14.8917	47.619	0	36.9057	0	14.1083	0	0	0	18.6052	12.3164	5.69315	55.4399	0	0	0	32.3822	0
0	11.9409	0	0	26.6779	0	34.6311	0	19.0857	9.86083	0	0	21.037	0	0	0	0	0	0	0	0	0	11.9684	13.5798	0	36.3686	27.6613	0	11.9832	0	0	0	19.1507	0	71.5555	0	33.3333	0	22.5511	0	8.38813	0	8.111	0	0	0	0	4.61502	0	0
21.5839	0	33.3333	7.74642	0	3.28076	0	0	5.95599	29.4995	8.4712	24.6496	3.14843	0	0	14.6691	0	0	0	0	3.83061	11.4547	18.49	0	25.9758	0	0	0	0	0	0	0	7.15303	27.1074	0	15.413	14.6776	0	0	0	0	5.69934	7.13565	0	0	3.90484	0	14.1979	19.524	30.2863
3.66113	0	16.3345	0	0	10.7725	0	0	0	0	0	0	0	17.9594	14.9313	0	0	20.353	9.20871	0	0	0	27.383	19.819	0	0	0	24.8283	10.3096	8.53789	0	21.6505	0	0	0	0	0	0	0	10.0738	25.0752	2.16313	0	0	0	0	0	18.6992	0	0
0	0	10.9225	0	11.7055	41.326	0	31.5034	0	0	15.8542	0	0	11.7124	36.229	22.9871	0	12.6192	0	0	43.5586	41.8973	8.82871	0	17.5093	0	16.3378	0	0	0	0	14.6724	0	2.74361	0	15.466	16.2938	33.2561	17.4919	15.551	24.9452	0	17.8935	25.2155	0	16.5891	0	9.86478	0	0
0	11.9761	0	21.7185	18.8079	0	18.3718	15.889	33.3333	9.30472	0	19.1125	0	0	0	0	0	0	14.6451	22.2526	0	0	0	19.7535	33.3333	18.1643	0	0	0	0	23.0687	0	0	0	0	14.295	0	0	0	19.5874	12.812	14.7281	0	19.0191	0	27.0458	0	0	17.6035	0
20.4407	32.3628	7.26914	16.1466	0	22.5608	31.7284	0	12.4174	8.66986	25.7167	33.3333	15.3423	23.8277	0	44.7688	6.69145	12.0843	20.5241	10.4392	13.4598	20.6145	0	10.8964	0	35.435	14.0916	10.4888	14.576	35.6912	31.3597	5.08906	32.3173	0	20.6571	0	3.2105	0	13.8645	0	0	19.2255	47.2146	0	40.1385	0	47.0927	19.1354	16.6809	0
0	0	0	0	4.08015	0	0	0	0	0	0	0	32.2921	0	0	0	0	0	0	0	0	0	3.90621	9.10344	0	0	5.67204	20.0211	0	0	0	0	0	7.12709	0	0	0	29.3303	0	0	0	4.24009	0	0	0	0	0	2.88592	13.8093	8.54405
0	0	0	0	0	0	0	0	0	0	0	0	0	0	0	0	0	0	0	0	0	0	0	0	4.04195	0	0	0	0	0	0	5.23372	0	0	0	0	16.5338	0	0	0	3.09526	0	0	0	0	0	0	6.48481	1.0792	0
0	0	0	0	0	0	0	0	0	0	0	0	0	0	0	0	0	0	0	0	0	0	0	0	0	0	0	0	18.7172	0	0	0	0	2.81594	0	0	0	0	0	0	0	0	26.14	0	0	5.01881	0	0	0	0
0	0	0	0	0	0	0	0	0	0	0	0	0	0	16.822	0	11.4961	0	0	0	0	0	0	0	14.9992	0	0	0	0	0	0	11.3486	19.5734	0	16.3136	0	0	22.063	6.49922	3.41108	0	0	0	0	0	0	33.3333	11.0535	0	14.5059
15.1917	31.4143	28.6477	22.9511	8.04293	66.6667	7.53523	16.9421	36.1954	3.37713	57.1094	0	10.9957	12.9037	6.69675	20.6048	0	57.6138	25.708	18.8698	19.6296	72.3506	3.63909	36.439	18.7656	66.8573	15.8689	37.1748	19.8051	72.9301	27.3049	14.5704	0	17.1292	0	34.4643	28.4933	0	0	0	0	16.9996	0	12.6368	0	0	0	0	9.08878	6.65327
0	0	0	0	0	0	27.1029	0	0	0	0	6.06759	0	0	0	0	0	0	18.744	0	0	0	12.23	0	0	0	12.8482	0	0	0	0	0	15.6726	0	0	0	0	0	0	0	0	14.7875	13.6692	15.75	0	7.78012	0	0	24.5507	0
19.3789	21.294	0	14.3982	0	0	0	0	0	14.4419	0	0	0	0	0	22.4977	0	0	0	0	0	0	0	0	0	0	0	0	0	0	0	0	0	0	57.9736	0	0	0	22.4832	0	0	0	33.3333	0	0	0	14.2375	0	0	0
33.3333	35.2524	14.5409	21.204	38.7374	33.3333	17.3377	50	41.5092	33.3333	20.4188	66.6667	12.4711	33.3333	20.5686	4.83227	0	20.7514	0	33.3333	46.788	16.5111	33.3333	33.3333	0	33.1427	36.5277	11.4648	14.6162	9.95878	19.6552	13.304	39.7946	0	8.20206	4.73446	54.9729	53.894	26.8341	0	49.5451	0	19.7791	0	33.3333	33.3333	0	25.9004	23.1654	33.3333
18.1416	0	23.4781	26.0586	33.3333	0	25.7981	33.0579	22.2953	0	6.66667	27.2657	61.8861	0	26.6366	0	88.5039	21.6348	24.6446	47.7969	0	11.1383	0	10.5447	0	0	0	24.0855	46.8616	17.1111	53.0399	21.9847	13.7599	27.2871	0	6.54026	0	0	0	66.6667	0	68.213	7.07837	17.5833	0	33.3333	19.0959	26.8485	42.116	0
0	0	33.3333	0	0	0	15.9957	0	0	48.8477	15.8051	0	0	26.8308	0	0	0	0	20.3945	0	0	0	29.6942	0	14.5678	0	34.7552	27.2749	0	0	0	27.6123	0	52.7677	17.5107	33.3333	0	24.043	44.1835	29.9223	47.3597	0	0	54.0299	66.6667	20.5344	33.3333	0	0	45.5075
13.9544	12.0393	0	15.3881	19.8864	0	6.23039	0	0	0	0	0	14.6471	26.9321	29.2761	52.0652	0	0	10.509	0	33.5824	0	21.1033	19.683	47.6255	0	0	0	0	0	0	5.9462	11.1995	0	0	20.9277	0	0	0	0	0	0	0	0	0	0	0	29.7127	0	0
33.3333	66.6667	0	21.4616	7.52984	61.0409	0	0	23.4943	0	7.33652	25.4557	0	0	23.987	0	0	56.9285	0	18.8531	0	13.432	0	11.862	0	76.0601	0	0	8.43489	66.6667	31.5714	0	13.8645	0	4.09605	20.0767	52.1708	0	0	0	0	31.6869	31.8098	0	0	0	9.35454	0	12.2749	0
18.7263	0	33.3333	0	0	0	14.5016	40.9449	33.3333	0	13.1762	10.8505	33.3333	14.189	19.4911	0	0	0	20.8426	0	0	21.9586	0	0	0	0	0	0	13.5285	33.3333	0	0	0	0	13.9691	0	25.8474	9.16667	0	12.4247	0	0	0	0	0	33.3333	0	23.2565	15.9299	0
0	0	0	0	0	0	0	0	0	31.6378	0	0	12.3921	0	0	12.7035	0	23.902	0	55.6244	23.7773	33.3333	18.8863	28.3637	0	0	16.0659	28.0608	0	0	0	27.0013	33.3333	29.1953	16.9352	0	0	16.3525	36.2703	25.6596	39.2891	0	33.3333	51.0953	20.8012	18.7041	48.0153	19.1584	0	3.17992
0	0	33.3333	27.5063	33.3333	33.3333	0	0	0	0	6.31123	0	0	0	0	0	0	0	0	0	0	0	33.3333	0	34.7758	4.57277	13.6355	16.0145	9.53405	0	0	33.3333	0	0	29.2373	0	0	18.1876	0	0	0	0	11.6101	23.2336	33.3333	0	0	0	0	33.3333
24.0441	0	0	9.79122	11.99	0	9.87414	20.6422	14.539	13.1609	20.1571	22.9883	0	11.9596	8.25	23.7644	0	0	33.3333	0	0	2.57842	0	0	33.3333	0	0	33.3333	0	0	27.4784	0	33.3333	0	0	33.3333	0	10.5903	0	0	0	39.819	17.2502	0	0	33.3333	0.536327	10.0768	10.4153	33.3333
0	0	0	0	0	0	33.3333	0	0	19.6993	19.6856	0	17.0591	0	13.8423	0	0	0	28.9887	14.4802	0	2.80674	0	33.3333	17.5987	0	6.8438	0	53.1382	0	0	26.0908	11.2208	0	0	0	0	0	33.3333	21.1459	0	17.5814	0	0	0	0	12.5749	0	0	0
14.607	0	0	17.6988	33.3333	0	18.8318	0	0	15.3296	0	0	20.9412	0	9.3463	20.6299	100	0	0	11.0423	33.3333	0	14.4471	0	0	0	8.59883	22.5914	0	0	16.5212	6.33208	0	48.8676	0	0	0	16.9808	0	20.9086	4.97843	0	0	0	12.5321	14.6292	0	33.3333	37.7316	0
0	0	33.3333	23.5421	0	5.6258	0	38.4129	22.3775	20.1725	0	21.7403	0	33.3333	0	33.3333	0	19.1695	0	0	9.55599	0	0	21.4713	14.2921	19.3671	0	0	15.3644	0	13.52	0	0	0	0	13.2567	7.48593	28.7221	17.4208	19.8611	44.7799	0	0	15.5714	0	0	0	0	21.0585	0
0	0	0	0	0	0	0	0	6.25585	0	0	0	0	0	0	9.56893	0	0	0	0	0	8.56795	33.3333	4.96959	0	0	18.8003	0	0	0	0	0	0	21.9371	19.3643	0	0	0	12.9756	0	0	0	5.99661	0	0	0	0	0	0	0
9.28928	0	0	0	13.8135	0	23.4592	0	0	0	33.3333	18.9652	16.2742	7.18478	25.0833	0	0	0	16.8354	0	33.3333	17.3229	0	0	0	0	36.0557	0	0	0	10.9091	7.24258	8.24805	0	16.3982	0	14.4959	0	0	0	10.9525	10.9127	0	10.0997	33.3333	0	29.5189	14.175	2.58986	30.1534
0	47.7717	48.3803	11.7206	26.6958	41.1641	17.8184	7.2486	38.078	27.2895	4.72088	0	0	10.9509	0	49.4507	51.9084	0	11.2227	0	39.0662	0	17.8357	20.3206	0	24.8816	0	24.4286	0	43.0625	0	5.05442	20.5206	18.0154	33.3333	19.3967	24.1762	0	14.5077	34.1474	0	26.0914	39.3	0	45.9646	51.5817	0	31.3774	0	20.4718
25.0361	0	9.25401	20.1407	0	0	0	0	0	0	0	0	42.2076	0	0	0	0	20.4078	33.3333	19.8981	0	18.3472	0	4.32645	51.4115	22.1921	0	0	31.5756	0	0	3.35083	0	33.3333	0	0	16.4506	6.02693	0	33.3333	14.9335	0	12.866	16.1684	0	0	0	0	0	0
26.8966	0	0	27.9969	0	0	0	31.9898	0	25.3636	16.7243	35.0256	0	0	25.9318	0	0	21.9727	33.3333	47.3608	0	0	55.8225	0	22.6333	20.1408	13.0435	0	0	0	21.7941	4.68548	33.3333	0	3.70804	10.6081	0	52.7973	54.1032	16.8766	0	0	0	33.3333	0	0	22.7551	0	9.7961	40.2619
33.3333	18.6022	0	0	39.3531	19.8716	24.8156	20.1378	0	18.0595	48.675	27.4722	33.3333	55.7158	28.6898	31.1467	0	33.3333	0	0	22.2901	28.49	0	28.4591	0	0	33.3333	22.7696	0	0	54.5439	43.5742	0	31.3098	0	50.6786	33.3333	0	0	12.5329	33.3333	35.6532	10.9678	33.3333	0	41.0511	23.8082	37.5485	38.9446	0
0	27.4321	7.30906	21.6127	0	0	0	0	32.3459	0	0	0	9.75988	23.0801	0	14.0907	48.0916	0	22.1106	0	13.7419	32.7919	0	29.0069	0	19.593	0	33.3333	25.581	21.311	0	0	9.40844	0	13.9258	0	0	9.70453	0	0	0	0	20.4674	0	0	0	16.0199	8.39687	0	6.45747
8.29719	0	12.3027	5.33643	15.3656	13.9523	0	0	0	0	0	24.4521	0	0	6.0204	0	0	6.33905	0	0	0	0	15.4976	10.484	6.63055	0	33.3333	0	17.6983	27.4998	0	23.5934	5.04945	0	0	0	0	0	0	0	39.0651	13.3109	0	0	42.8345	0	0	0	0	0
0	0	0	0	18.5855	10.5331	33.3333	18.0102	17.646	7.96974	0	0	0	0	0	5.31186	0	11.3606	0	13.4352	12.8163	0	0	0	0	0	0	0	0	0	0	0	0	0	0	0	9.15709	0	0	3.10975	0	0	4.92956	17.1649	0	7.36715	0	0	7.03961	26.4048
6.43678	6.19411	0	0	0	14.4788	0	22.6136	11.9301	0	13.2708	0	0	10.2533	11.767	0	0	0	0	0	0	4.84336	0	4.87428	13.8163	13.1925	0	0	0	2.29315	12.1228	0	0	17.3415	49.0328	19.3165	0	13.8694	12.5635	0	0	0	0	0	11.2009	0	20.1034	0	0	6.4041
0	0	0	13.1926	0	0	8.51777	0	0	0	0	13.0501	14.6992	0	0	0	0	0	0	9.62373	0	0	10.8442	2.52874	0	0	0	8.90472	7.75236	0	0	0	0	0	0	0	16.8828	0	0	0	0	24.9445	0	0	0	0	0	0	23.5372	0
0	0	22.7539	0	0	0	15.515	0	0	21.3176	16.609	0	0	0	27.591	0	0	6.58647	0	9.68213	12.0855	15.5276	0	0	5.50826	0	20.2899	10.5637	17.3928	5.83355	11.5393	19.7416	31.6882	0	0	0	0	17.6019	18.8257	0	12.668	0	11.4693	0	0	0	17.3134	22.6772	20.6824	0
10.7432	17.6084	9.88466	17.6758	25.4221	12.2477	0	49.0913	12.9885	5.9901	0	8.65237	28.5337	15.1871	0	4.3034	0	0	7.07505	5.31782	15.681	9.96728	13.0131	20.8051	0	0	36.0505	0	23.4257	0	6.15023	20.2525	5.699	11.9837	26.2126	22.347	11.2522	8.6237	15.9534	27.4022	32.6027	15.7179	12.5553	29.4349	12.6147	10.4257	0	6.37615	14.9485	19.3292
10.6184	25.2146	0	0	0	21.5248	0	0	0	0	11.536	0	0	15.6952	13.7774	10.2618	0	0	0	10.3169	0	0	0	5.90212	19.5498	17.1485	0	13.2441	0	2.13465	7.31383	0	0	0	6.27204	0	35.1082	0	0	15.1581	0	24.6427	0	0	0	0	0	0	0	0
17.2432	0	8.70477	7.94326	0	0	29.8285	0	26.0045	0	0	0	0	16.4385	0	21.8986	36.3356	30.2388	53.2803	5.20011	22.0518	0	0	0	0	12.9869	0	0	0	0	6.04096	0	0	54.675	0	4.9756	0	28.8994	10.6476	0	5.20177	0	0	0	24.3683	0	11.5779	0	0	19.5414
0	0	46.1822	0	9.2605	4.89312	0	0	0	0	17.6486	0	0	0	12.812	0	0	0	11.6561	0	0	7.39609	11.4103	14.7733	0	0	0	32.1466	17.3196	26.1066	7.87167	17.1874	49.4531	8.02792	16.9457	8.99651	19.3565	0	0	16.3973	0	16.7836	0	24.4364	29.2902	33.3333	19.6731	17.7199	20.0904	8.92698
0	0	0	12.0307	13.8746	8.97581	18.2408	0	42.1743	33.3333	33.3333	32.5973	0	13.5368	15.0197	0	0	0	0	0	22.6645	0	36.9154	0	0	4.45991	33.3333	20.0892	0	7.69704	0	52.9345	0	0	27.0613	0	0	0	41.5	7.88076	18.5921	0	27.6087	0	0	33.3333	0	0	0	0
0	0	0	25.3901	0	0	0	28.0417	0	57.9739	8.16868	25.6629	30.673	3.22755	0	8.54922	0	0	0	23.0164	8.25355	33.3333	0	27.4312	66.6667	0	17.7278	0	10.8578	0	0	0	0	10.0868	0	0	14.9017	33.3333	0	0	15.2886	0	0	12.2825	0	12.812	26.5914	0	33.3333	16.4085
22.715	0	5.05156	0	36.6365	0	0	0	0	0	0	16.0029	21.4554	0	0	23.0715	0	0	14.6022	56.1487	0	0	0	22.2835	13.7836	20.3464	0	0	0	0	46.6038	0	18.4279	0	7.12071	49.6906	7.43176	24.7096	22.6857	0	0	26.306	14.7232	8.89695	0	0	28.4974	26.9572	31.6278	13.792
38.6803	57.1769	10.5998	0	14.8062	52.3585	36.8382	22.867	0	0	15.6847	0	19.3379	14.4106	33.3333	0	0	69.7612	0	0	11.2816	49.3033	16.7382	0	0	18.7112	0	17.8974	33.3333	39.1506	0	0	10.5326	0	0	0	0	0	0	17.3597	12.5494	0	17.5824	0	0	0	3.51526	15.6134	0	0
0	0	19.577	36.9602	0	0	15.0925	0	18.8327	0	13.6286	17.0844	0	16.8948	25.0576	31.9154	63.6644	0	13.3863	0	20.0676	0	21.923	8.80474	0	26.347	12.8884	16.6227	15.0635	24.9111	26.0195	0	0	0	16.3876	13.9904	9.22495	0	9.21325	15.802	15.7655	16.5498	21.4756	0	33.7268	10.0956	0	33.3333	0	22.002
0	0	0	0	0	0	0	0	0	2.7027	0	0	0	4.60947	0	0	0	0	0	0	0	0	0	0	0	0	0	0	0	0	0	9.62567	15.8874	15.2266	0	0	2.72464	4.43389	0	0	0	0	6.05487	24.9492	0	0	10.1449	0	0	0
0	0	0	0	0	0	0	0	0	0	0	0	0	0	0	0	0	0	0	0	0	0	0	0	4.64744	0	10.7011	9.80651	0	0	0	11.0589	0	10.542	0	0	0	13.7376	0	0	0	0	0	0	0	0	0	0	0	0
0	0	0	0	0	0	0	0	0	0	0	0	0	0	0	0	0	0	0	0	0	0	0	0	3.2771	8.2875	0	0	0	0	13.0885	0	0	0	25.1329	0	0	25.6047	0	0	0	0	0	0	0	0	0	16.2512	0	0
33.3333	75.1436	44.536	18.3878	24.8068	26.9644	12.465	12.9625	9.15513	22.4397	28.7244	28.8911	7.57285	23.3253	5.48044	0	63.3086	26.2	22.054	6.99563	0	46.2403	21.1479	62.3495	0	26.7992	21.4501	11.8909	10.4262	50.7506	5.25357	0	15.6514	0	0	29.0757	52.6131	0	9.73069	15.897	12.5865	0	11.0155	0	0	0	0	0	0	40.8895
33.3333	0	33.3333	0	33.3333	0	19.6565	0	20.6371	17.2068	11.3221	0	0	0	0	0	0	33.3333	0	18.797	0	0	15.371	0	0	0	0	0	16.7174	33.3333	0	0	30.6716	24.5697	11.739	0	0	18.2458	0	8.3983	0	27.5861	0	0	0	0	42.662	13.0896	34.4648	0
33.3333	0	0	33.3333	33.3333	22.0504	0	0	0	0	0	0	33.3333	0	19.4436	46.5133	0	0	23.9027	0	66.6667	0	0	0	0	58.3792	20.9452	11.0947	6.69022	0	22.3237	30.733	0	0	10.7048	10.673	19.4864	6.93069	0	0	0	0	33.3333	22.5771	0	0	29.3879	0	25.4885	19.3955
0	24.8564	22.1307	33.3333	8.5265	39.7023	0	70.6639	20.8054	39.1158	0	22.7606	0	23.4286	0	33.3333	0	27.976	0	33.3333	19.6152	33.3333	0	8.89578	56.8664	0	0	44.9692	5.00381	0	9.68156	0	17.3582	0	0	0	0	0	0	0	18.7374	54.869	22.3179	0	62.9057	0	0	59.1042	0	0
0	0	0	0	0	0	40.5219	0	19.8761	16.1265	24.2314	22.1807	59.0938	19.9128	27.8529	0	19.6765	7.1333	0	26.3377	0	0	45.5188	19.6262	0	6.53415	12.3882	0	16.616	15.9161	0	9.68642	0	33.3333	0	2.40308	10.2295	0	56.936	33.0069	12.8365	0	33.3333	0	0	24.0005	18.0184	0	0	0
0	0	0	0	0	0	20.8683	0	0	0	21.3783	0	0	0	33.3333	11.6107	0	0	33.3333	14.5363	0	0	17.9623	0	9.13458	0	11.8832	0	26.6431	0	0	23.181	20.4671	15.3602	8.2004	9.64083	17.671	15.0347	0	27.3802	0	0	0	66.6667	3.76092	33.3333	0	0	18.7077	0
0	0	0	0	0	11.2829	0	0	16.9983	0	0	15.5949	0	0	13.8898	8.54271	17.0148	0	20.71	0	0	0	0	0	0	0	22.6322	22.2386	17.9033	0	0	0	15.8516	0	44.2229	27.9502	0	0	33.3333	0	29.0208	0	0	10.7563	0	33.3333	5.9862	0	7.84482	39.7149
0	0	0	14.9455	0	0	6.48826	16.3737	12.5279	5.11126	14.3437	10.5727	0	33.3333	0	0	0	5.35729	0	0	13.7181	20.4264	0	9.12852	26.0745	0	0	0	0	0	49.6527	25.3407	0	16.1947	0	20.2572	0	20.4464	0	15.3176	26.8188	17.5449	0	0	33.3333	9.33286	3.94542	11.555	13.4942	0
6.67923	59.0034	47.6491	34.0205	51.4198	0	10.579	0	24.5211	0	0	0	47.9183	10.5927	0	0	0	62.5	0	40.5526	33.3333	35.3441	18.7378	19.5807	0	0	0	33.3333	0	47.6499	0	0	0	10.7863	0	13.9489	31.3748	0	20.3704	0	0	44.6653	13.2161	0	26.0624	0	22.2503	52.544	0	0
29.0025	0	16.5072	0	20.2965	50.89	0	0	0	15.0725	40.3176	33.3333	0	19.1088	0	0	35.1434	0	27.2541	0	21.7025	0	47.2433	12.6732	0	39.7363	18.8172	14.6695	0	0	0	0	38.119	0	12.2999	0	33.3333	0	0	28.6811	29.4065	0	10.0705	13.2666	0	0	19.388	0	8.54989	30.2084
0	0	0	0	0	23.7047	18.0171	0	0	18.5821	0	0	0	0	29.3773	6.07105	0	0	22.4721	0	0	0	0	0	26.56	20.8846	0	8.22908	0	9.74268	23.8817	33.3333	0	14.1372	0	33.3333	0	15.334	1.70671	0	0	0	0	0	0	33.3333	18.5932	0	14.3689	0
40.9225	18.7607	0	27.6265	0	0	0	50	6.04817	0	12.1549	4.67873	0	22.7406	16.0613	22.5294	0	0	33.3333	33.3333	0	8.95387	0	33.3333	7.12315	26.9303	13.257	0	13.9971	0	0	33.3333	26.4726	0	21.6545	19.3844	8.90281	0	46.2963	0	20.189	12.8362	0	26.219	34.0866	0	0	0	0	0
0	16.6416	16.8261	0	0	0	24.4962	50	0	0	0	13.3015	21.6375	33.3333	0	18.4058	0	33.3333	0	0	23.0294	0	14.5955	12.899	0	0	0	0	33.3333	24.3972	0	27.4117	5.44438	0	0	0	0	66.6667	0	24.3006	0	0	0	0	0	33.3333	0	0	0	0
0	0	0	17.5332	0	0	15.0381	0	33.3333	61.8288	9.29994	18.5486	0	0	0	8.26975	0	0	0	0	0	25.036	0	7.88161	7.57371	12.4487	0	18.6639	17.4185	4.44088	0	0	0	22.5471	54.3668	0	0	0	8.63002	24.0784	33.3333	33.3333	21.8784	0	15.0968	0	11.083	16.8094	15.4427	44.5558
0	0	10.9402	9.24939	7.64228	9.62861	0	0	0	0	0	0	30.4442	14.2245	17.4236	10.8039	27.1758	0	10.8612	0	11.6309	0	19.4234	0	0	0	47.8495	0	19.3362	13.7694	66.6667	0	12.2427	0	0	0	0	0	0	0	3.92683	0	25.6178	27.1811	24.7542	0	0	8.10998	18.9645	9.63316
14.8378	5.59426	8.0774	0	4.3667	0	24.1534	0	2.76409	0	17.0492	20.0319	0	0	0	0	0	0	0	0	0	0	0	0	0	0	0	0	0	0	0	5.9216	17.7213	52.5295	0	33.3333	0	17.9993	0	13.685	0	9.16514	0	33.3333	0	33.3333	28.6855	0	0	0
0	0	0	0	10.8802	0	0	0	33.3333	4.5166	21.1784	10.1061	0	0	0	0	0	4.16667	6.07923	0	0	11.0994	0	0	16.8973	0	0	25.1043	0	0	0	0	0	0	0	0	26.389	0	0	0	13.1444	0	5.95435	0	0	0	0	16.5239	0	0
8.55796	0	0	11.5703	5.39455	15.7767	7.7163	0	0	0	0	0	0	0	37.1379	33.9201	37.6808	0	0	26.1141	10.3039	19.5667	0	13.6322	41.8458	0	20.0764	0	15.9148	0	9.45166	0	0	0	11.6788	0	0	0	22.9966	9.25495	0	0	23.2628	0	0	0	0	6.01266	42.6741	15.6026
23.2962	14.4049	37.0021	16.7625	0	13.7894	0	0	38.7441	33.3679	2.50951	21.8672	22.5386	50.1165	0	15.562	0	20.487	34.7668	0	23.9669	19.2856	30.3126	0	0	38.2386	15.2959	30.061	2.94867	17.4275	0	14.1856	0	0	28.6071	47.1181	0	22.3797	11.9886	30.3672	20.5112	33.742	0	13.4747	37.0116	33.3333	0	0	5.68338	26.4075
35.9589	0	0	22.2169	23.2949	27.1484	13.7123	58.6648	0	0	0	30.7764	0	0	21.8738	0	0	0	0	13.6641	0	0	0	0	15.7474	25.125	24.8875	0	0	26.784	0	12.0708	29.7097	30.3131	0	22.5054	0	0	27.5646	8.87906	12.18	0	0	13.1183	0	62.179	37.4835	0	0	0
0	50.6485	22.0863	16.6347	19.3509	0	17.0862	0	0	0	5.96348	0	24.6916	13.1744	0	0	0	0	0	21.2538	16.8353	0	8.88434	15.4459	0	0	0	0	28.1996	23.9419	34.7407	26.2363	0	0	33.3333	0	40.0427	44.7732	0	0	0	11.1807	37.0311	12.0254	29.6763	0	20.1669	8.12633	13.1455	0
0	0	23.9857	6.53103	0	0	29.335	0	0	33.3333	24.2493	0	0	0	0	17.7713	0	59.7315	0	20.0581	12.126	26.9569	8.51301	29.374	0	0	0	25.3085	21.9332	0	33.3333	0	0	33.3333	0	0	25.4172	0	21.3447	7.37463	28.4005	15.7631	0	19.8586	0	0	0	23.5353	4.31662	38.1748
16.2475	0	0	0	0	6.18498	0	0	12.6068	0	37.3003	15.0286	36.0417	26.1362	54.6541	0	0	0	45.5008	0	0	0	0	0	8.48854	10.3481	0	15.1149	0	0	0	21.2625	43.011	11.5741	14.2408	6.1707	0	1.81091	0	0	7.59494	0	0	6.75269	4.36771	0	0	22.1288	19.1744	12.6669
0	24.9322	0	11.1164	35.3826	4.59	0	31.9769	17.8675	33.2988	0	0	4.60211	0	0	15.3543	0	0	0	31.7488	22.8959	33.7402	21.392	7.89651	33.3333	3.91775	51.3708	0	0	0	17.7125	3.42803	4.71304	7.6941	0	0	0	9.22481	0	25.026	0	15.7237	21.571	21.3079	16.9725	0	29.1832	0	5.06103	0
0	10.0143	0	0	0	33.3333	0	0	0	0	0	0	0	10.573	0	0	100	6.21245	8.65205	0	0	0	13.0419	17.8874	14.8333	8.11242	0	21.4908	22.3143	7.67378	0	0	0	0	17.0867	10.8279	16.5383	2.39678	5.76874	28.3531	0	22.1527	0	0	0	0	0	25.207	0	14.9391
10.0371	0	11.247	26.7384	13.9824	0	0	0	10.0701	0	24.9269	0	0	0	9.84222	33.3333	0	13.569	0	0	2.33435	3.26103	0	13.3567	9.09742	8.20831	8.44588	0	19.4705	0	3.64928	22.8167	9.7954	12.5553	0	0	0	19.4146	0	0	31.3133	0	0	0	11.972	0	0	0	0	0
0	0	0	0	0	0	39.8665	9.35836	0	0	0	20.8617	8.08639	0	0	0	0	0	11.0803	0	11.4041	9.82936	17.8561	16.0394	0	6.04978	0	8.02481	5.13377	15.9407	0	0	12.7708	4.53006	0	13.3779	18.0018	0	33.3333	0	0	1.43795	8.31213	0	0	0	0	11.2046	15.1268	7.81173
14.4602	0	5.67886	0	7.98911	14.9539	0	0	20.7115	0	5.05051	11.4661	4.03963	0	13.6299	17.979	0	0	0	13.2752	10.4375	6.92693	0	0	18.5	0	0	0	0	8.23207	10.5641	0	0	0	6.73203	0	0	0	0	0	0	0	33.0857	13.4624	0	4.4877	13.1664	9.79801	37.4922	0
0	6.36325	3.31998	11.5981	0	0	0	0	0	34.8545	0	10.9404	0	15.9972	23.378	0	0	5.71304	21.5316	14.8268	0	0	0	0	0	13.3326	22.6289	0	0	0	14.0661	24.0195	0	1.7205	0	7.78824	0	5.7726	3.45384	15.664	13.5468	1.33527	0	16.3127	27.5942	14.9133	0	0	0	13.3849
16.2078	13.5891	10.6325	0	12.7478	23.9923	0	27.2134	12.4703	0	0	0	0	25.853	0	16.8776	66.034	0	7.91503	0	0	0	34.7098	0	0	0	0	35.831	0	0	0	13.4272	45.3841	0	14.7491	17.4306	0	12.0993	0	26.524	0	6.36425	0	14.1348	0	16.4783	3.13195	17.6746	0	0
0	0	0	23.4022	0	14.8604	19.7311	21.4877	10.8194	0	22.598	0	30.5765	26.814	0	23.3378	0	36.064	0	0	16.4995	20.4664	0	0	15.7262	0	0	22.6651	60.6376	12.489	0	0	14.0701	25.8581	24.4214	8.74403	6.36895	9.25369	27.1655	0	33.3333	11.2233	22.1232	13.5823	0	0	0	0	17.0026	10.7137
31.5641	52.7801	25.4081	12.9376	39.1141	24.8764	0	0	20.8995	30.2029	18.3936	0	21.5894	0	39.0206	0	0	0	12.8014	10.2564	31.895	10.6685	0	27.7929	20.456	38.9935	44.2188	0	0	0	22.9097	12.8909	0	40.2011	0	0	0	0	20.1221	0	28.7866	12.0481	29.8087	3.13668	10.6413	2.0808	0	44.2584	0	6.89335
0	0	0	21.7352	0	0	55.9038	0	0	0	0	0	0	4.63768	0	25.5278	0	12.266	0	24.7452	0	14.9705	33.3333	22.6128	0	0	0	0	0	35.9068	13.2669	0	0	0	9.24113	16.4437	33.1875	24.1147	0	14.0509	0	0	0	0	15.2074	7.61985	67.7556	0	55.8577	20.6096
0	4.71623	38.5205	0	0	10.3175	0	22.7866	20.863	7.32058	0	41.7408	15.523	0	0	0	13.4638	0	0	22.5954	0	0	0	0	0	0	19.1404	0	13.2705	0	9.84085	19.9061	18.0634	0	8.91194	15.9027	0	30.3876	16.185	0	0	7.90444	0	19.751	0	0	0	0	0	0
17.1255	3.44149	0	20.3957	0	0	0	0	12.4338	0	25.4453	0	0	0	14.6571	0	0	0	25.4183	0	0	0	0	23.186	22.18	0	0	30.8356	14.0587	0	16.0735	9.31387	19.2632	0	33.3333	0	26.9644	0	0	28.5015	12.2226	26.9691	15.3578	25.5801	5.54213	36.8612	0	0	0	22.6196
21.7739	0	0	0	27.5525	0	13.6023	0	0	0	14.9398	33.3333	26.9138	0	12.989	16.4557	0	30.6027	0	0	16.8338	41.0277	0	10.7206	17.6071	0	0	0	0	0	0	20.4425	0	15.875	0	24.5893	0	0	19.8623	0	0	0	0	0	34.2396	0	18.6234	15.6587	16.3307	13.0551
13.3286	19.1098	22.1189	9.93113	20.5855	17.7979	10.7629	28.5123	22.5139	27.622	18.6233	13.9854	0	19.2178	9.95536	17.8011	20.5022	15.3543	32.3336	18.988	34.7717	12.8669	10.8342	15.6877	24.0307	47.6739	0	10.6682	0	51.6042	23.843	0	3.21919	16.3452	9.34313	9.10142	16.769	0	13.2112	0	12.1106	34.1555	32.7103	0	0	10.8002	10.4891	22.4083	10.809	0
0	0	0	0	0	8.15545	0	0	0	0	0	0	5.39727	7.48038	0	0	0	0	0	8.58809	0	0	21.1226	0	0	0	14.0119	0	12.0332	0	0	0	0	0	0	0	16.7102	18.3721	0	15.2596	0	0	0	7.50246	6.7754	11.2464	0	0	0	12.7238
0	0	0	0	0	0	0	0	0	0	0	0	0	0	0	0	0	0	0	0	0	0	0	0	0	0	0	0	14.9192	0	0	0	0	0	0	0	16.9165	11.0983	0	0	0	0	0	0	0	0	0	0	0	0
0	0	0	0	0	0	0	10.7335	0	0	0	0	12.6137	0	0	0	0	0	0	0	0	0	0	0	0	0	0	0	8.22996	0	0	0	0	0	23.7456	0	0	0	0	0	19.7425	6.94048	0	0	10.4465	0	0	0	11.1636	23.868
31.7404	13.1368	13.0716	11.5667	16.1585	34.4459	31.1994	0	43.8788	0	17.4568	32.9986	7.30412	9.92397	21.7252	27.7029	0	45.8764	25.8786	13.9193	27.064	42.6286	10.6833	51.8024	3.61111	39.2459	16.5852	0	0	41.8285	29.4453	9.44308	21.5453	9.08863	11.0774	13.5546	8.06547	0	0	13.5426	8.37527	0	0	0	0	0	0	11.2789	0	0
0	15.3436	0	13.1792	0	0	0	18.2918	0	8.04217	16.6723	0	0	0	13.406	0	0	0	0	0	0	23.0941	20.5492	0	24.6622	0	0	0	0	0	0	11.7884	7.43757	0	0	13.0745	0	12.4198	0	12.6798	0	0	52.6652	15.7683	0	5.88956	0	0	0	6.33502
0	0	21.3233	0	9.10408	0	0	0	0	37.3445	0	0	14.2051	26.133	0	0	0	0	0	52.6792	0	0	9.72034	0	0	4.56099	35.677	36.3856	0	33.3333	40.612	11.4946	0	0	9.82651	33.3333	16.4168	33.3333	0	0	8.93018	0	0	0	5.10749	0	50.5701	0	0	0
61.8621	53.5298	33.3333	43.5228	38.0826	30.0732	0	22.7297	6.48438	0	33.3333	0	36.1609	28.6804	7.00463	5.06569	0	40.5889	7.19685	0	60.3721	0	0	0	9.0404	32.5141	0	33.3333	32.2528	24.8381	20.4953	23.8903	0	0	22.2559	0	33.3333	6.73114	0	0	0	61.4339	33.3333	0	33.3333	8.47157	0	0	12.5814	3.06984
0	0	0	20.1542	3.45327	0	43.3643	8.08488	0	25.2912	32.5375	67.0014	0	23.4094	23.7765	26.7918	0	13.5347	0	0	0	14.8877	0	48.1976	19.5441	0	23.5337	0	11.8399	0	0	0	36.895	14.8837	14.7895	10.8135	25.2679	20.9135	33.3333	9.85226	19.7862	13.1679	0	0	0	0	33.3333	55.3878	66.6667	33.6568
0	0	32.2718	0	0	0	0	0	24.2531	15.9698	0	0	0	0	19.9273	21.3681	100	0	20.0168	33.4015	12.5639	19.3896	12.7841	0	0	0	6.14667	12.754	0	0	9.44742	21.5449	0	33.3333	0	0	0	0	66.6667	0	40.6446	5.23276	14.0015	33.3333	51.1127	33.3333	0	0	0	6.3955
0	0	0	0	0	21.7479	0	16.5368	11.4371	13.3523	0	0	10.588	7.20036	0	19.0715	0	0	46.9078	0	0	0	46.2631	0	29.353	0	18.0574	17.5271	26.1839	0	0	21.8387	0	29.864	0	19.7788	0	0	0	35.865	0	0	0	50.8984	0	24.8618	0	33.3333	0	26.6748
6.39745	17.9898	0	11.5771	33.2016	13.733	25.4364	23.6233	13.9466	0	0	0	19.1282	4.65294	14.1603	0	0	0	0	0	0	0	0	0	13.7892	23.679	0	0	6.57429	0	0	0	34.1222	12.8303	18.305	9.4454	0	15.5039	0	28.0604	2.5212	13.2249	0	0	0	27.4438	16.0966	0	9.58832	0
12.8551	27.3722	20.5927	0	5.19555	27.8092	6.10998	0	9.73526	0	34.5199	30.1854	9.12951	6.20049	16.272	0	0	58.6943	0	1.48198	17.7984	27.358	0	42.2427	0	24.3379	15.6366	33.3333	0	48.9069	50.6237	18.3582	0	0	16.8411	12.3765	0	0	22.205	0	23.2475	16.586	3.24379	0	14.6506	0	16.2744	0	6.74633	0
16.0378	20.0614	0	31.4676	0	0	13.7168	0	8.48428	12.1143	27.7537	0	0	24.2085	14.5289	26.8155	0	0	0	0	18.9114	18.2696	13.8186	27.3693	4.61075	16.9856	0	0	21.7364	0	0	0	11.2419	0	6.62202	18.8561	58.8186	21.9111	10.2698	0	33.3333	20.0821	9.09323	23.7708	0	0	0	18.5366	0	0
17.1466	0	33.3333	0	22.9275	0	0	0	0	0	0	10.7076	15.2539	0	0	26.4333	0	33.3333	0	39.4256	0	0	0	0	0	0	0	0	5.30793	28.5243	0	0	0	46.8988	0	0	0	0	0	0	0	0	16.7089	0	0	0	29.8497	0	11.9543	0
0	0	0	54.6301	0	49.5048	0	29.1686	15.9075	18.768	6.65519	0	0	45.7298	9.74142	0	81.1713	0	48.8972	0	0	33.3333	0	0	0	0	40.6638	33.3333	0	0	0	0	0	0	33.3333	7.66386	0	0	0	46.9393	0	0	16.7033	0	33.3333	14.34	0	33.4046	24.3429	48.4033
0	33.3333	33.3333	0	13.3409	0	46.8399	0	41.0648	0	0	0	0	0	17.7372	0	0	0	0	14.7528	14.8635	0	0	0	37.9659	7.79643	0	0	0	0	12	23.6463	8.37102	15.9228	16.4922	0	0	20.7572	29.7276	0	33.3333	16.7473	7.60849	17.3402	2.95626	0	7.40879	0	7.49315	0
20.4783	0	12.7406	0	0	0	33.3333	50	0	0	0	21.2932	24.2038	0	0	0	0	0	33.3333	0	0	0	0	17.3731	0	42.3287	17.999	0	25.4955	0	0	6.15093	19.1532	0	26.7113	0	6.69387	24.8069	0	0	0	0	0	24.9121	0	0	0	0	0	17.0969
16.1867	5.96115	0	0	33.3333	5.5241	0	0	0	54.5524	15.4332	22.6257	0	14.7363	0	6.90002	0	7.97236	0	0	0	5.97532	0	0	28.7226	0	0	33.3333	0	13.984	8.74793	0	22.0914	19.7679	0	14.4772	0	19.9487	0	0	10.0858	28.9362	0	0	0	18.9933	0	20.1044	0	18.2633
0	0	0	0	10.4058	3.67369	0	0	7.69055	0	15.6381	0	51.4128	0	41.7204	6.51783	18.8287	0	0	17.0986	29.9569	15.0637	52.848	7.0508	0	0	0	0	28.0254	8.58484	11.6384	27.7492	0	17.4106	0	46.6263	0	0	33.3333	33.3333	0	13.2513	0	0	0	33.3333	9.65011	0	30.3694	0
0	0	0	0	14.7968	0	0	20.8314	0	0	0	15.1881	0	9.12481	0	0	0	0	0	27.241	0	0	0	0	14.2338	0	25.7006	0	7.06296	0	16.99	8.82423	0	0	0	0	0	0	0	0	0	0	46.6423	0	15.7265	33.3333	36.817	0	0	16.2365
17.2956	13.2719	0	13.9023	0	13.4882	0	0	17.1175	14.5653	0	0	0	0	0	33.3333	0	0	17.7695	0	18.4698	0	33.3333	5.96405	14.4669	8.55135	0	0	12.3718	0	0	15.2712	39.1425	0	0	0	34.4875	12.5761	4.46429	19.7273	0	4.39711	0	33.9769	0	0	0	27.9543	19.0939	0
14.9721	37.5241	25.0559	32.2217	0	0	13.6541	0	0	3.92157	19.1538	18.273	33.3333	21.3609	1.70262	0	0	62.8902	0	17.4135	0	0	0	15.9337	15.6956	26.6531	0	0	5.25459	0	0	0	0	22.569	28.5031	5.3351	0	0	15.2278	5.01416	10.1801	16.0051	0	0	17.6288	6.6121	0	0	9.19887	11.9223
27.6799	0	19.3645	0	17.8124	19.7417	24.8886	0	0	0	0	42.404	17.0434	15.4952	12.6231	45.756	0	0	29.942	0	21.8946	12.252	15.9554	0	0	0	52.4779	51.6127	14.5114	70.1847	0	0	0	22.3181	18.3048	59.5764	0	43.2064	0	20.9635	12.3898	18.7051	0	0	31.6699	51.3099	21.6688	7.14729	23.2555	13.9872
0	0	19.0698	29.5133	13.6483	5.96861	0	9.96055	21.645	22.1115	21.2745	0	0	10.4653	0	0	51.7365	0	0	19.9393	18.8745	30.641	10.8844	18.2998	0	0	0	0	0	0	38.2381	33.525	0	0	31.9024	19.4297	33.6698	0	6.61408	0	33.3333	4.91873	40.3104	33.3333	0	0	29.7307	0	0	13.8965
0	19.6264	0	0	0	33.3333	0	25.7832	0	19.2064	32.2587	0	0	0	24.3909	0	0	32.3258	19.3607	22.6949	0	0	0	0	0	0	18.3351	8.64505	33.3333	0	0	33.3333	54.7134	29.2775	0	0	21.4673	0	0	28.3192	0	0	0	11.5985	0	13.9945	33.3333	22.4797	0	0
0	0	0	0	7.8262	0	0	0	33.3333	0	0	15.0603	0	10.4667	0	0	0	0	0	0	33.3333	10.8926	0	42.3004	53.0276	25.6099	0	0	0	0	0	0	33.3333	9.35252	0	0	0	0	0	0	0	0	0	33.3333	18.6957	0	0	33.3333	24.1345	0
18.3613	9.8881	13.9689	0	33.3333	0	0	0	11.6883	13.8434	0	18.6397	0	0	0	0	0	0	0	15.9199	0	13.3786	0	0	0	0	0	0	11.6865	5.10407	39.3178	14.7503	0	0	0	7.09024	0	0	43.3859	33.3333	6.07708	24.2472	22.1516	0	15.7046	0	0	26.186	24.2885	40.7572
33.3333	27.743	22.541	15.4769	19.685	40.9564	18.8791	0	33.3333	21.4271	22.5309	0	49.6233	34.8405	26.298	0	0	0	12.016	10.6384	25.8975	0	64.0952	15.0336	0	13.9375	3.77929	24.2143	28.0787	0	22.4441	18.3913	11.9533	11.0153	15.0285	0	14.6684	13.4501	21.8373	9.52982	1.25681	14.2675	0	0	8.41167	8.86468	3.60262	10.8536	10.0778	14.3863
5.65348	5.21842	0	22.788	0	0	12.946	64.2562	0	19.4899	0	0	0	0	14.7015	11.7647	48.2635	4.78402	30.1777	13.3941	0	25.133	0	0	31.2768	13.7799	0	0	0	12.7291	0	0	0	5.46763	6.26125	8.56849	18.3284	10.0102	0	0	0	0	0	0	0	19.2188	11.6645	0	0	0
0	0	0	0	7.69472	0	0	0	0	0	4.78214	0	0	7.37143	0	19.3464	0	0	0	0	0	0	0	8.4326	0	20.0196	0	0	7.13538	0	0	0	0	0	0	0	11.866	33.3333	0	0	21.8964	0	0	0	0	0	0	0	0	0
0	0	0	0	0	0	29.6323	0	0	0	0	5.62298	0	0	20.2839	23.1328	0	0	8.5036	0	0	7.70281	9.06502	0	0	0	25.4077	15.528	0	11.9821	0	0	0	0	0	0	0	0	12.9349	2.84001	14.8665	21.8564	37.538	21.7348	7.88945	0	0	0	9.04488	5.05051
0	0	0	7.41943	11.292	38.7095	0	0	12.6774	11.2392	34.5707	3.55167	31.8947	0	16.0487	0	0	42.2408	12.2605	44.6166	2.69401	6.85528	23.3818	24.7711	0	0	0	0	0	0	0	22.9956	21.2025	2.6517	31.2417	21.9575	6.427	0	24.1519	39.8141	7.29822	0	0	0	0	14.1988	34.2427	0	18.8145	16.6839
43.3629	23.9871	12.7072	0	18.2875	19.2434	0	31.1952	0	0	0	0	21.8945	11.8609	0	40.5899	0	15.7397	8.13631	0	0	0	0	0	35.8922	21.5579	0	20.0074	19.928	31.5977	50.6541	14.7331	0	31.4422	20.2885	34.3138	0	25.0079	9.09951	0	0	0	7.19463	8.42259	5.7757	23.2199	0	17.4902	11.8262	38.1418
0	28.6133	33.3333	33.3333	11.6792	0	16.951	43.4402	22.0085	17.2727	0	32.6387	0	0	24.3244	0	0	0	0	17.5939	35.1574	37.1044	9.40332	21.8902	0	34.6273	29.8147	15.7275	20.0917	0	0	14.2517	43.8704	4.13159	0	0	10.6753	0	11.482	0	0	43	5.28912	35.9778	54.9143	15.3027	0	25.4421	0	10.6687
0	0	22.7163	23.43	10.7828	0	0	0	0	0	33.3333	0	0	51.2741	0	0	54.9917	0	25.3833	0	0	0	15.1932	0	17.0862	0	15.8156	10.2805	19.0449	0	0	0	12.1308	0	0	0	16.7979	9.23334	9.18141	0	28.4314	0	5.27987	15.2548	0	12.0438	22.5877	0	7.32484	0
19.1919	0	0	0	0	13.0655	24.3636	0	18.2898	2.96213	0	0	12.3692	7.05035	3.44132	0	0	0	0	2.78746	6.76518	0	8.69448	5.47022	0	0	4.12768	0	0	8.44786	9.15387	10.0358	0	3.16849	0	0	17.309	26.6217	9.09005	32.2593	10.042	0	8.99661	8.09644	9.35399	0	0	10.8118	11.8441	0
0	10.4341	0	25.9139	0	7.56318	0	0	0	16.0606	0	18.7074	0	0	0	12.0328	0	0	8.69131	14.5079	2.97531	0	9.95154	0	6.91266	0	0	4.03387	6.77679	0	6.10602	0	0	0	0	5.25999	9.81322	4.8939	20.5192	4.4914	15.5597	6.85185	0	0	0	0	0	0	0	16.503
19.7181	0	20.6261	9.90329	0	0	0	0	0	0	0	18.2273	0	15.3926	0	11.9663	0	0	21.0728	0	0	33.3333	0	20.9467	13.1334	16.2173	0	0	14.2884	0	0	29.4194	0	12.9999	34.6786	11.3758	0	0	0	0	0	33.3333	28.0442	11.5375	0	18.0307	20.0668	16.835	0	0
0	9.34628	0	0	11.2585	16.5375	0	0	11.3249	0	32.096	6.6524	11.0083	0	42.3423	16.2766	45.0083	42.0195	0	0	12.5463	0	15.2355	0	17.641	11.7755	0	49.9507	19.8702	11.3404	34.086	8.56442	0	32.056	0	15.4298	0	0	0	8.17675	0	0	17.1421	20.7109	0	17.2041	7.69332	10.1667	11.0005	4.74295
17.727	27.6192	10.617	0	36.7	4.88095	58.6854	25.3646	35.6995	19.132	0	11.0742	11.3945	14.422	13.8434	7.21734	0	0	7.95003	20.4941	39.8618	22.707	18.1401	26.9217	9.33448	15.8221	3.51862	0	0	48.614	0	0	22.7963	0	0	11.6631	38.9776	34.2432	15.1438	4.22042	0	16.8148	28.0535	0	11.7523	0	0	19.2542	21.5071	13.2596
0	0	0	0	0	0	0	0	0	33.3333	0	9.14821	11.4388	0	0	11.9171	0	0	16.5057	0	0	0	0	0	0	0	46.7234	0	0	0	0	0	0	13.5501	13.7913	0	0	0	1.33212	11.038	38.6687	0	0	0	18.2037	0	15.4095	0	17.6827	0
0	0	0	0	0	0	0	0	0	0	0	0	0	12.8423	0	0	13.6525	0	0	0	0	13.033	0	0	0	0	0	0	0	0	0	17.1318	0	0	18.2936	0	0	16.2095	2.52633	0	0	5.95719	0	0	0	5.36769	0	0	0	24.3501
3.36391	0	0	0	2.95898	5.77079	0	21.0933	1.33103	17.7576	0	0	9.15283	0	0	0	0	0	7.09315	7.82147	0	13.3028	4.44511	0	4.92589	0	0	0	17.3574	0	2.65313	0	8.79335	0	21.5806	0	12.9701	0	6.78543	2.93781	0	3.02507	15.8527	2.42099	0	0	0	5.53732	10.8638	0
0	3.46021	12.1832	11.4589	0	0	2.95359	0	0	0	0	5.51065	2.94273	0	0	0	0	8.37214	0	0	15.2792	0	0	0	16.7491	0	4.53319	4.00111	0	0	0	0	3.16274	4.53142	0	0	0	0	4.45261	0	10.5371	0	6.41444	0	13.5993	0	0	15.9315	0	0
0	0	6.13736	0	0	9.53413	11.2242	0	0	0	0	0	0	0	0	0	0	0	0	0	0	0	0	0	0	0	0	0	12.1762	0	0	25.7144	0	16.2225	18.7926	0	0	4.83638	0	0	0	0	0	5.67633	0	0	0	0	4.72276	0
0	0	0	0	0	0	0	0	0	0	0	0	0	0	0	0	18.8907	0	13.5833	0	9.25228	0	0	0	0	0	9.98077	0	0	0	0	0	9.88669	22.1103	0	11.77	5.70342	0	0	0	0	0	0	16.9554	0	0	9.63979	0	25.2987	0
0	46.4586	12.7283	12.883	15.2132	0	9.95164	0	31.5124	0	14.5727	0	16.3687	0	0	7.42589	0	40.9606	42.5253	28.1489	23.9666	25.9432	4.0135	28.9338	23.604	45.0458	0	0	15.9816	14.7707	31.4657	11.5785	20.9125	0	11.7963	12.9594	0	33.3333	0	0	15.8029	0	0	0	0	0	12.5049	7.48057	0	6.21809
0	0	0	0	30.3743	12.4081	0	0	0	0	33.3333	0	0	0	0	0	0	0	0	0	0	0	0	0	0	0	31.2112	0	0	0	0	0	0	0	11.7527	0	0	33.3333	0	0	6.02118	0	9.68992	10.9302	30.1754	0	0	27.3584	20.5835	0
0	0	0	30.7585	0	52.6045	0	28.9067	0	0	33.3333	33.3333	33.3333	33.3333	0	33.3333	0	0	19.75	0	32.0985	0	28.8882	16.5392	16.5842	0	0	62.6656	0	33.3333	0	0	0	40.025	0	0	27.6299	0	55.4286	63.7289	0	0	0	0	0	0	0	27.796	22.4696	48.9056
63.3028	29.9144	68.9512	44.8996	51.4534	0	75.8705	50	67.1565	48.9091	18.7606	61.156	38.2024	53.8244	100	30.8692	67.4567	50.6673	17.0483	64.0296	19.4035	15.7688	62.6532	21.1936	38.1368	54.9542	0	33.3333	54.4849	33.3333	40.924	16.2015	57.2448	17.1108	17.7842	54.8966	25.1285	0	30.807	33.3333	50.8637	30.3083	68.0429	0	56.2253	94.6323	0	15.8962	8.02708	20.5262
33.3333	20.1668	0	0	0	19.6825	0	0	0	33.3333	0	0	0	0	0	28.3715	0	0	0	0	0	31.9521	0	33.3333	0	0	54.2749	0	0	18.5626	24.9571	29.3737	0	0	0	20.374	28.5681	12.2875	0	0	16.7751	60.7095	0	64.0171	0	0	77.8553	0	8.03465	0
0	0	0	0	0	0	0	0	0	0	0	0	0	0	0	0	0	0	47.8197	0	0	21.0046	0	0	0	33.3333	0	24.7189	0	0	0	0	0	0	0	0	0	13.3825	0	0	0	0	8.96309	0	0	0	0	0	16.5957	0
0	35.6949	0	0	16.2753	0	0	0	0	32.4911	0	26.1068	19.3287	33.3333	0	6.80464	0	20.3422	0	0	0	0	0	15.4402	0	33.3333	0	0	0	0	13.7216	0	0	0	7.19113	25.106	20.2284	0	0	50.5534	13.6046	0	0	0	33.3333	0	0	0	33.3333	6.55971
24.8464	0	33.3333	16.8734	0	0	6.13351	18.5549	11.2625	0	24.9228	0	0	0	29.5793	0	24.4768	14.4067	18.1151	48.833	59.4917	0	12.6775	0	17.3843	33.3333	14.45	7.7147	0	14.9766	29.9064	0	15.3038	18.9367	8.65385	0	10.391	0	33.3333	0	11.3848	17.7835	57.7036	11.0182	0	0	0	31.5022	33.3333	0
0	0	33.3333	0	0	16.4256	0	34.1029	0	6.73702	10.1412	33.3333	0	10.4987	7.0657	0	0	0	0	0	0	8.65753	0	0	0	0	4.81576	33.3333	6.12204	0	0	19.5763	0	0	0	0	0	0	0	2.30984	3.87656	20.0922	0	0	0	33.3333	33.3333	0	16.7376	26.3533
33.3333	8.41087	0	0	50.3914	24.9092	0	0	0	0	0	8.38933	21.486	0	0	36.8515	0	0	0	0	0	0	33.3333	0	33.3333	0	0	0	0	0	52.9451	24.2376	33.3333	17.3137	26.1422	26.4574	0	0	33.3333	0	0	0	33.3333	0	33.3333	44.3458	33.3333	0	0	0
0	13.707	11.6113	33.3333	0	33.3333	60.5332	0	59.9337	0	0	0	1.39565	33.3333	15.7391	0	0	0	9.60307	18.9251	0	0	20.6558	0	33.3333	0	18.0909	0	31.9389	18.3567	0	0	0	8.91252	33.3333	33.3333	0	33.3333	33.3333	16.1133	17.4398	0	0	22.3151	0	0	0	0	0	26.7736
0	33.3333	0	0	33.3333	0	25.3269	0	0	20.2937	0	0	0	0	3.83436	0	56.2329	18.9267	15.2182	18.3759	33.3333	35.7352	33.3333	0	15.9491	0	36.0542	4.54876	0	0	0	33.3333	0	0	24.6795	0	69.3805	7.45714	0	31.0235	0	41.9244	0	0	33.3333	0	33.3333	35.1645	0	0
33.3333	8.85394	0	33.3333	0	8.42417	0	0	22.0708	0	25.8042	7.2265	24.4563	0	26.2676	0	0	12.9911	9.24393	0	7.17494	0	0	17.8931	0	0	0	0	0	33.3333	3.42695	0	33.3333	0	0	0	0	19.9509	0	0	14.3028	0	0	0	0	22.3209	0	0	0	0
0	0	0	0	0	0	0	0	6.73295	0	0	24.944	0	22.8346	0	8.85074	0	0	0	0	0	34.6027	0	33.3333	0	0	0	0	20.2942	0	0	9.09577	0	17.6347	0	6.87593	0	0	0	0	0	0	0	0	0	0	0	33.3333	0	22.2127
8.48694	0	21.722	16.4599	0	16.9077	8.00642	47.3422	0	40.4783	39.1319	0	0	0	17.5139	47.4931	19.2903	0	0	13.8661	0	0	0	0	0	0	26.5892	29.6843	41.6449	0	0	13.7571	18.0296	37.2024	0	8.22731	0	25.8762	0	0	39.3914	20.1999	0	0	0	0	0	0	0	18.1006
0	41.3753	30.9738	0	25.6092	26.4869	9.6563	0	34.7329	4.97614	0	19.5678	17.4227	17.3842	0	0	0	0	19.5358	33.3333	0	8.4835	37.6908	11.3007	10.7809	51.0663	0	0	0	17.1964	10.7053	0	24.7943	0	49.0065	0	13.8004	8.07027	44.7571	42.7462	0	22.26	25.1875	74.298	21.7701	31.8762	0	0	13.1148	0
14.7726	18.6443	0	11.9188	0	0	14.7998	0	0	0	0	27.8673	0	0	16.8481	10.9139	30.0452	42.6437	45.7894	0	18.094	9.07824	0	14.9346	9.70912	0	10.2253	26.5344	7.99752	33.983	16.5766	27.7953	0	26.7961	0	60.0175	35.1332	10.4401	33.3333	33.3333	0	0	0	0	24.9083	23.6942	22.9947	39.8284	0	20.7862
13.2342	0	0	39.2243	21.8661	0	0	0	10.4377	28.2257	0	0	18.6356	7.62766	0	0	0	0	0	26.8274	19.2275	0	0	9.29374	0	20.7065	0	0	32.8131	0	19.138	0	22.6965	0	0	0	0	0	0	0	22.015	0	12.9419	0	0	14.0548	13.6655	0	42.0172	36.8494
12.3804	0	0	0	14.964	65.0544	33.3333	7.22493	0	11.3935	23.0259	0	20.5108	0	20.625	0	0	24.1426	0	16.4331	0	6.86531	18.1818	22.0326	51.2676	0	22.1117	33.3333	0	0	0	0	33.3333	11.3918	21.1234	0	0	0	0	0	0	16.6847	13.8803	0	18.4944	0	11.0507	0	0	0
0	19.2756	33.3333	38.6903	0	0	23.677	38.3309	0	0	14.3758	24.9941	15.9107	33.3333	49.8186	5.26234	0	0	0	0	33.3333	26.8437	0	0	0	7.09297	33.3333	0	10.4567	16.1369	0	0	0	13.2103	0	0	18.0637	31.2377	21.9096	1.52772	5.68024	11.0733	21.6535	9.07021	22.7872	0	0	9.03311	0	0
18.5608	0	16.2646	0	0	0	0	0	17.3699	14.7124	13.5946	5.00407	0	12.3041	0	44.189	0	0	13.7976	0	29.3451	0	0	18.3987	0	0	23.108	33.3333	0	15.4428	0	33.3333	8.53902	0	0	31.3357	0	0	0	0	11.3183	33.3333	20.3914	14.8101	0	9.63911	28.349	14.4048	0	0
0	6.01574	0	10.1667	0	0	18.5335	18.4105	14.5639	5.1076	12.6088	13.7655	12.8225	18.3467	0	0	0	24.023	20.8773	0	0	0	20.8019	24.0396	23.6242	2.97994	0	6.79896	0	5.13633	39.3848	38.8714	0	3.05562	0	0	0	0	0	10.0684	0	0	0	0	0	8.20309	0	0	8.00254	22.2724
20.9529	14.6891	19.4283	0	26.0934	8.45874	0	0	22.8956	0	0	0	0	0	12.7083	17.1571	69.9548	9.19071	0	6.50589	0	48.7293	15.1515	0	4.61814	5.52746	3.37753	0	0	0	14.1954	0	10.6368	42.0645	17.455	0	24.2144	0	0	0	27.6531	0	0	0	3.61495	12.5326	0	24.3002	30.0334	20.092
20.0991	0	0	0	11.4672	0	0	0	0	0	0	0	0	0	0	22.4777	0	0	0	0	0	0	0	0	0	12.6269	0	0	48.7327	0	0	0	0	3.48161	0	0	0	10.1754	0	0	33.3333	0	5.9453	0	8.42502	0	0	12.4334	0	0
0	0	0	0	0	0	0	36.0336	0	35.5846	36.395	8.80119	14.6977	11.004	0	0	0	0	0	16.9002	0	0	8.17392	0	0	0	7.84407	0	0	12.1046	0	0	0	0	12.4151	8.64678	8.78827	40.0766	0	12.3243	0	16.6486	0	1.82163	0	0	23.94	0	6.83206	0
19.5385	45.8296	0	5.24584	0	26.3389	55.896	0	42.948	21.562	0	7.7791	10.882	16.9227	0	10.7062	0	0	36.3045	24.3239	21.9651	17.9101	0	38.9625	22.2296	37.6091	42.2622	11.0302	0	0	9.6514	0	25.2428	0	9.18185	0	5.97654	0	0	33.7073	32.6422	0	0	38.8159	23.6403	16.5955	8.85483	10.2564	4.13862	25.0998
15.6088	0	61.9624	27.1752	19.1549	18.7027	0	0	0	0	0	0	0	0	17.4788	0	0	59.7375	12.5231	0	0	0	0	0	0	0	0	13.9276	38.4407	15.094	35.0669	26.7078	0	14.9835	21.5162	26.8448	0	0	15.3038	11.7138	8.32025	15.6962	0	0	18.6198	22.9066	7.91544	0	0	37.8885
[truncated: 269 more rows]
[truncated: 99 more columns]

## Sheet: ENDO1234_v_BN_
						Cut Off lower	Cut Off primary	c-0 val	c-o mult	stdev	mean					1	2	3	4	5	6	7	8	9	10	11	12	13	14	15	16	17	18	19	20	21	22	23	24	25	26	27	28	29	30	31	32	33	34
[truncated: 1,869 more rows]
[truncated: 6 more columns]

[truncated: 13 more sheets: ENDO1234 v BN, OV34_v_endo34, ov_34_v_34_endo_lcq1, OV12_V_Endo_12, ov12_v__endo12, Endo12_V_Endo34_, endo12vendo34, Endo34_v_bn_, endo34vBN_, ENDO12_V_BN__, endo12vbn_, oV_1234_v_en_1234, ov1234vendo1234]
