# Supplementary material for: The Role of Insulin-like Peptide in Maintaining Hemolymph Glucose Homeostasis in the Pacific White Shrimp Litopenaeus vannamei
Source: Int J Mol Sci. 2022 Mar 17;23(6):3268. doi: 10.3390/ijms23063268 (PMC8948857; doi:10.3390/ijms23063268)
Supplement: Supplementary file 1 [file ijms-23-03268-s001.zip › Supplementary SB. File SB5. Peak list for MSMS analysis of sera.xlsx]

## Sheet: Sheet1
M/z_peak	test		injection file		M/z_peak	test		injection file		M/z_peak	test	isolation order	injection file
509	Endometrial Cancer stages IIIC & IV vs Benign Gynecology	1	1		505	Endometrial Cancer stages I & II vs Endometrial Cancer stages IIIC & IV	1	1		506	Endometrial Cancer stages I & II vs Benign Gynecology	1	1
514	Endometrial Cancer stages IIIC & IV vs Benign Gynecology	2	1		506	Endometrial Cancer stages I & II vs Endometrial Cancer stages IIIC & IV	2	1		521	Endometrial Cancer stages I & II vs Benign Gynecology	2	1
525	Endometrial Cancer stages IIIC & IV vs Benign Gynecology	3	1		511	Endometrial Cancer stages I & II vs Endometrial Cancer stages IIIC & IV	3	1		525	Endometrial Cancer stages I & II vs Benign Gynecology	3	1
577	Endometrial Cancer stages IIIC & IV vs Benign Gynecology	4	1		517	Endometrial Cancer stages I & II vs Endometrial Cancer stages IIIC & IV	4	1		528	Endometrial Cancer stages I & II vs Benign Gynecology	4	1
579	Endometrial Cancer stages IIIC & IV vs Benign Gynecology	5	1		520	Endometrial Cancer stages I & II vs Endometrial Cancer stages IIIC & IV	5	1		541	Endometrial Cancer stages I & II vs Benign Gynecology	5	1
601	Endometrial Cancer stages IIIC & IV vs Benign Gynecology	6	1		532	Endometrial Cancer stages I & II vs Endometrial Cancer stages IIIC & IV	6	1		549	Endometrial Cancer stages I & II vs Benign Gynecology	6	1
603	Endometrial Cancer stages IIIC & IV vs Benign Gynecology	7	1		535	Endometrial Cancer stages I & II vs Endometrial Cancer stages IIIC & IV	7	1		558	Endometrial Cancer stages I & II vs Benign Gynecology	7	1
614	Endometrial Cancer stages IIIC & IV vs Benign Gynecology	8	1		549	Endometrial Cancer stages I & II vs Endometrial Cancer stages IIIC & IV	8	1		559	Endometrial Cancer stages I & II vs Benign Gynecology	8	1
631	Endometrial Cancer stages IIIC & IV vs Benign Gynecology	9	1		559	Endometrial Cancer stages I & II vs Endometrial Cancer stages IIIC & IV	9	1		584	Endometrial Cancer stages I & II vs Benign Gynecology	9	1
661	Endometrial Cancer stages IIIC & IV vs Benign Gynecology	10	1		562	Endometrial Cancer stages I & II vs Endometrial Cancer stages IIIC & IV	10	1		603	Endometrial Cancer stages I & II vs Benign Gynecology	10	1
662	Endometrial Cancer stages IIIC & IV vs Benign Gynecology	11	1		589	Endometrial Cancer stages I & II vs Endometrial Cancer stages IIIC & IV	11	1		618	Endometrial Cancer stages I & II vs Benign Gynecology	11	1
680	Endometrial Cancer stages IIIC & IV vs Benign Gynecology	12	1		617	Endometrial Cancer stages I & II vs Endometrial Cancer stages IIIC & IV	12	1		638	Endometrial Cancer stages I & II vs Benign Gynecology	12	1
692	Endometrial Cancer stages IIIC & IV vs Benign Gynecology	13	1		627	Endometrial Cancer stages I & II vs Endometrial Cancer stages IIIC & IV	13	1		649	Endometrial Cancer stages I & II vs Benign Gynecology	13	1
702	Endometrial Cancer stages IIIC & IV vs Benign Gynecology	14	1		636	Endometrial Cancer stages I & II vs Endometrial Cancer stages IIIC & IV	14	1		665	Endometrial Cancer stages I & II vs Benign Gynecology	14	1
703	Endometrial Cancer stages IIIC & IV vs Benign Gynecology	15	1		667	Endometrial Cancer stages I & II vs Endometrial Cancer stages IIIC & IV	15	1		683	Endometrial Cancer stages I & II vs Benign Gynecology	15	1
710	Endometrial Cancer stages IIIC & IV vs Benign Gynecology	16	1		691	Endometrial Cancer stages I & II vs Endometrial Cancer stages IIIC & IV	16	1		733	Endometrial Cancer stages I & II vs Benign Gynecology	16	1
745	Endometrial Cancer stages IIIC & IV vs Benign Gynecology	17	1		692	Endometrial Cancer stages I & II vs Endometrial Cancer stages IIIC & IV	17	1		761	Endometrial Cancer stages I & II vs Benign Gynecology	17	1
768	Endometrial Cancer stages IIIC & IV vs Benign Gynecology	18	1		703	Endometrial Cancer stages I & II vs Endometrial Cancer stages IIIC & IV	18	1		763	Endometrial Cancer stages I & II vs Benign Gynecology	18	1
781	Endometrial Cancer stages IIIC & IV vs Benign Gynecology	1	2		708	Endometrial Cancer stages I & II vs Endometrial Cancer stages IIIC & IV	1	2		781	Endometrial Cancer stages I & II vs Benign Gynecology	1	2
848	Endometrial Cancer stages IIIC & IV vs Benign Gynecology	2	2		718	Endometrial Cancer stages I & II vs Endometrial Cancer stages IIIC & IV	2	2		830	Endometrial Cancer stages I & II vs Benign Gynecology	2	2
855	Endometrial Cancer stages IIIC & IV vs Benign Gynecology	3	2		733	Endometrial Cancer stages I & II vs Endometrial Cancer stages IIIC & IV	3	2		836	Endometrial Cancer stages I & II vs Benign Gynecology	3	2
861	Endometrial Cancer stages IIIC & IV vs Benign Gynecology	4	2		749	Endometrial Cancer stages I & II vs Endometrial Cancer stages IIIC & IV	4	2		841	Endometrial Cancer stages I & II vs Benign Gynecology	4	2
868	Endometrial Cancer stages IIIC & IV vs Benign Gynecology	5	2		754	Endometrial Cancer stages I & II vs Endometrial Cancer stages IIIC & IV	5	2		843	Endometrial Cancer stages I & II vs Benign Gynecology	5	2
879	Endometrial Cancer stages IIIC & IV vs Benign Gynecology	6	2		759	Endometrial Cancer stages I & II vs Endometrial Cancer stages IIIC & IV	6	2		861	Endometrial Cancer stages I & II vs Benign Gynecology	6	2
888	Endometrial Cancer stages IIIC & IV vs Benign Gynecology	7	2		774	Endometrial Cancer stages I & II vs Endometrial Cancer stages IIIC & IV	7	2		867	Endometrial Cancer stages I & II vs Benign Gynecology	7	2
897	Endometrial Cancer stages IIIC & IV vs Benign Gynecology	8	2		784	Endometrial Cancer stages I & II vs Endometrial Cancer stages IIIC & IV	8	2		868	Endometrial Cancer stages I & II vs Benign Gynecology	8	2
900	Endometrial Cancer stages IIIC & IV vs Benign Gynecology	9	2		833	Endometrial Cancer stages I & II vs Endometrial Cancer stages IIIC & IV	9	2		871	Endometrial Cancer stages I & II vs Benign Gynecology	9	2
907	Endometrial Cancer stages IIIC & IV vs Benign Gynecology	10	2		836	Endometrial Cancer stages I & II vs Endometrial Cancer stages IIIC & IV	10	2		878	Endometrial Cancer stages I & II vs Benign Gynecology	10	2
951	Endometrial Cancer stages IIIC & IV vs Benign Gynecology	11	2		841	Endometrial Cancer stages I & II vs Endometrial Cancer stages IIIC & IV	11	2		879	Endometrial Cancer stages I & II vs Benign Gynecology	11	2
956	Endometrial Cancer stages IIIC & IV vs Benign Gynecology	12	2		850	Endometrial Cancer stages I & II vs Endometrial Cancer stages IIIC & IV	12	2		897	Endometrial Cancer stages I & II vs Benign Gynecology	12	2
971	Endometrial Cancer stages IIIC & IV vs Benign Gynecology	13	2		854	Endometrial Cancer stages I & II vs Endometrial Cancer stages IIIC & IV	13	2		901	Endometrial Cancer stages I & II vs Benign Gynecology	13	2
983	Endometrial Cancer stages IIIC & IV vs Benign Gynecology	14	2		867	Endometrial Cancer stages I & II vs Endometrial Cancer stages IIIC & IV	14	2		906	Endometrial Cancer stages I & II vs Benign Gynecology	14	2
1002	Endometrial Cancer stages IIIC & IV vs Benign Gynecology	15	2		873	Endometrial Cancer stages I & II vs Endometrial Cancer stages IIIC & IV	15	2		907	Endometrial Cancer stages I & II vs Benign Gynecology	15	2
1012	Endometrial Cancer stages IIIC & IV vs Benign Gynecology	16	2		888	Endometrial Cancer stages I & II vs Endometrial Cancer stages IIIC & IV	16	2		940	Endometrial Cancer stages I & II vs Benign Gynecology	16	2
1014	Endometrial Cancer stages IIIC & IV vs Benign Gynecology	17	2		906	Endometrial Cancer stages I & II vs Endometrial Cancer stages IIIC & IV	17	2		943	Endometrial Cancer stages I & II vs Benign Gynecology	17	2
1016	Endometrial Cancer stages IIIC & IV vs Benign Gynecology	18	2		942	Endometrial Cancer stages I & II vs Endometrial Cancer stages IIIC & IV	18	2		951	Endometrial Cancer stages I & II vs Benign Gynecology	18	2
1018	Endometrial Cancer stages IIIC & IV vs Benign Gynecology	1	3		943	Endometrial Cancer stages I & II vs Endometrial Cancer stages IIIC & IV	1	3		959	Endometrial Cancer stages I & II vs Benign Gynecology	1	3
1022	Endometrial Cancer stages IIIC & IV vs Benign Gynecology	2	3		956	Endometrial Cancer stages I & II vs Endometrial Cancer stages IIIC & IV	2	3		962	Endometrial Cancer stages I & II vs Benign Gynecology	2	3
1030	Endometrial Cancer stages IIIC & IV vs Benign Gynecology	3	3		972	Endometrial Cancer stages I & II vs Endometrial Cancer stages IIIC & IV	3	3		971	Endometrial Cancer stages I & II vs Benign Gynecology	3	3
1045	Endometrial Cancer stages IIIC & IV vs Benign Gynecology	4	3		1002	Endometrial Cancer stages I & II vs Endometrial Cancer stages IIIC & IV	4	3		986	Endometrial Cancer stages I & II vs Benign Gynecology	4	3
1060	Endometrial Cancer stages IIIC & IV vs Benign Gynecology	5	3		1043	Endometrial Cancer stages I & II vs Endometrial Cancer stages IIIC & IV	5	3		994	Endometrial Cancer stages I & II vs Benign Gynecology	5	3
1062	Endometrial Cancer stages IIIC & IV vs Benign Gynecology	6	3		1044	Endometrial Cancer stages I & II vs Endometrial Cancer stages IIIC & IV	6	3		1017	Endometrial Cancer stages I & II vs Benign Gynecology	6	3
1081	Endometrial Cancer stages IIIC & IV vs Benign Gynecology	7	3		1049	Endometrial Cancer stages I & II vs Endometrial Cancer stages IIIC & IV	7	3		1022	Endometrial Cancer stages I & II vs Benign Gynecology	7	3
1090	Endometrial Cancer stages IIIC & IV vs Benign Gynecology	8	3		1060	Endometrial Cancer stages I & II vs Endometrial Cancer stages IIIC & IV	8	3		1045	Endometrial Cancer stages I & II vs Benign Gynecology	8	3
1092	Endometrial Cancer stages IIIC & IV vs Benign Gynecology	9	3		1076	Endometrial Cancer stages I & II vs Endometrial Cancer stages IIIC & IV	9	3		1049	Endometrial Cancer stages I & II vs Benign Gynecology	9	3
1097	Endometrial Cancer stages IIIC & IV vs Benign Gynecology	10	3		1085	Endometrial Cancer stages I & II vs Endometrial Cancer stages IIIC & IV	10	3		1050	Endometrial Cancer stages I & II vs Benign Gynecology	10	3
1125	Endometrial Cancer stages IIIC & IV vs Benign Gynecology	11	3		1087	Endometrial Cancer stages I & II vs Endometrial Cancer stages IIIC & IV	11	3		1053	Endometrial Cancer stages I & II vs Benign Gynecology	11	3
1167	Endometrial Cancer stages IIIC & IV vs Benign Gynecology	12	3		1097	Endometrial Cancer stages I & II vs Endometrial Cancer stages IIIC & IV	12	3		1065	Endometrial Cancer stages I & II vs Benign Gynecology	12	3
1168	Endometrial Cancer stages IIIC & IV vs Benign Gynecology	13	3		1107	Endometrial Cancer stages I & II vs Endometrial Cancer stages IIIC & IV	13	3		1089	Endometrial Cancer stages I & II vs Benign Gynecology	13	3
1175	Endometrial Cancer stages IIIC & IV vs Benign Gynecology	14	3		1120	Endometrial Cancer stages I & II vs Endometrial Cancer stages IIIC & IV	14	3		1090	Endometrial Cancer stages I & II vs Benign Gynecology	14	3
1188	Endometrial Cancer stages IIIC & IV vs Benign Gynecology	15	3		1142	Endometrial Cancer stages I & II vs Endometrial Cancer stages IIIC & IV	15	3		1107	Endometrial Cancer stages I & II vs Benign Gynecology	15	3
1195	Endometrial Cancer stages IIIC & IV vs Benign Gynecology	16	3		1157	Endometrial Cancer stages I & II vs Endometrial Cancer stages IIIC & IV	16	3		1114	Endometrial Cancer stages I & II vs Benign Gynecology	16	3
1197	Endometrial Cancer stages IIIC & IV vs Benign Gynecology	17	3		1162	Endometrial Cancer stages I & II vs Endometrial Cancer stages IIIC & IV	17	3		1122	Endometrial Cancer stages I & II vs Benign Gynecology	17	3
1211	Endometrial Cancer stages IIIC & IV vs Benign Gynecology	18	3		1167	Endometrial Cancer stages I & II vs Endometrial Cancer stages IIIC & IV	18	3		1125	Endometrial Cancer stages I & II vs Benign Gynecology	18	3
